# Supplementary material for: A cross-shaped organic framework: a multi-functional template arranging chromophores
Source: Royal Society of Chemistry journal article supplement (doi:10.1039/d4qo01808g), 2024-12-04

## **Supporting information**

### **Cross-Shaped Organic Framework; a Multi-Functional Template Arranging Chromophores**

C.C.E. Kroonen, A. D'Addio, A. Prescimone, D. Haussinger, M. Mayor\*

## Table of Contents

|                                                     |    |
|-----------------------------------------------------|----|
| General.....                                        | 3  |
| Synthesis.....                                      | 4  |
| Experimental procedure $C_{Br_2I_2}$ .....          | 4  |
| Experimental procedures Chromophore library.....    | 6  |
| Procedure template cleavage.....                    | 11 |
| Physico-Chemical analysis.....                      | 12 |
| Characterization $C_{Br_2I_2}$ .....                | 12 |
| Characterization chromophores.....                  | 14 |
| Optical analysis.....                               | 14 |
| Chiral-analysis.....                                | 18 |
| FRET-System.....                                    | 30 |
| Crystallographic data.....                          | 31 |
| <i>(rac)</i> - $C_{Br_2I_2}$ (CCDC – 2378892).....  | 31 |
| <i>(P)</i> - $C_{Br_2I_2}$ (CCDC – 2378893).....    | 33 |
| <i>(rac)</i> - $C_{Br_2BY_2}$ (CCDC – 2378894)..... | 35 |
| Geometry optimized structures.....                  | 37 |
| References.....                                     | 52 |
| NMR, IR and HR-ESI-MS spectra.....                  | 53 |

## General

All chemicals and solvents were purchased from SigmaAldrich, Acros, Apollo Scientific, Alfa Aesar and Fluorochem and used as received. NMR solvents were obtained from CIL Cambridge Isotope Laboratories, Inc., Acros, Sigma-Aldrich, or Apollo Scientific. Dry solvents were used as crown capped and purchased from Acros and Sigma-Aldrich. Column chromatography was performed manually or on a Biotage Isolera using SilicaFlashR P60 from Silicycle with particle size of 40-63  $\mu\text{m}$  (230-400 mesh) as stationary phase. TLC was performed with silica gel 60 F254 glass plates purchased from Merck. Recycling size-exclusion chromatography (SEC or GPC) was performed with a Shimadzu Prominence System equipped with SDV preparative columns from Polymer Standards Service (two Shodex columns in series, 20 $\times$ 600 mm each, exclusion limit: 30 000  $\text{g mol}^{-1}$ ) with chloroform as solvent. NMR experiments were performed on Bruker Avance III NMR spectrometers operating at 250, 400 or 500 MHz proton frequencies. The instruments were equipped with a direct-observe 5 mm BBFO smart probe (250, 400 MHz), or an indirect-detection 5 mm BBI probe (500, 600 MHz). All probes were equipped with actively shielded z-gradients (10 A). The chemical shifts are reported in ppm relative to TMS or referenced to residual solvent peak and the J values are given in Hz. Infrared spectra were recorded neat with an ATR equipped Shimadzu IRTacer-100. High-resolution mass spectra (HR-MS) were measured with a Bruker Maxis 4G ESI-TOF instrument. CD measurements were performed on a JASCO J-1500 CD Spectrophotometer in a 1 cm quartz glass cuvette. Quantum yields were recorded on an Absolute PL Quantum Yield Spectrometer: Hamamatsu Quantaaurus QY - C11347. Fluorescence lifetime measurements were performed on a Compact Fluorescence Lifetime Spectrometer: Hamamatsu Quantaaurus Tau - 11367. For analytical HPLC, a Shimadzu LC-20AT HPLC was used, equipped with a diode-array UV/Vis detector (SPD-M20 A VP from Shimadzu,  $\lambda=200\text{--}600$  nm) and a column oven Shimadzu CTO-20AC. For preparative HPLC, a Shimadzu LC-20AP HPLC was used equipped with a diode-array UV/Vis detector (SPD-M20 A VP from Shimadzu,  $\lambda=200\text{--}600$  nm). The used column for analytical separation on chiral stationary phase was a Chiralpak IG, IA, IC or IBN-5; 5  $\mu\text{m}$ , 4.6 $\times$ 250 mm, Daicel Chemical Industries Ltd and for preparative separation, Chiralpak IG, 5  $\mu\text{m}$ , 30 $\times$ 250 mm, Daicel Chemical Industries Ltd. DFT calculations<sup>[1]</sup>; Geometries were optimized either using Gaussian 09 or Gaussian 16 and stationary points were analyzed by subsequent frequency analysis.  $\text{C}_{\text{Br}212}$  was optimized at the B3LYP/3-21G level of theory while all other structures were optimized at the B3LYP/6-31G(d,p) level of theory. The initial guess was obtained from the crystallographic data and the *P* isomer was optimized. From the resulting geometry all initial guesses were modeled. CD spectra were simulated by calculation of rotary strengths at the TD-cam-B3LYP/6-31G(p,d) level of theory of the 50 lowest singlet transitions except for (*P*)- $\text{C}_{\text{Br}212}$  where we used the 3-21G basis set.<sup>[2]</sup> The simulated spectrum was fitted using SpecDis.<sup>[3]</sup>

## Synthesis

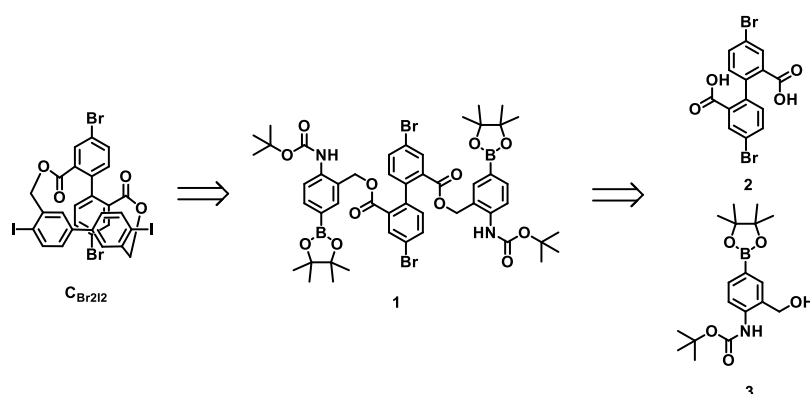

**Scheme S1:** Molecular design and retro-synthetic analysis of universal cross-shaped building block **C<sub>Br212</sub>**.

### Experimental procedure **C<sub>Br212</sub>**

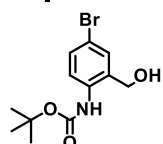

**Compound 5:** To a stirred solution of (2-amino-5-bromophenyl)methanol **4** (5.01 gr, 1 equiv.) in dry THF (82.5 mL) was added DIPEA (6 mL, 1.5 equiv.) at 0°C. A solution of di-tert-butyl dicarbonate (5.9 mL, 1.1 equiv.) in dry THF was added dropwise after which the reaction was allowed to warm to room temperature and where it was stirred for 18 hours. The mixture was diluted with EtOAc and washed with 0.1 M HCl 3 times. The organic phase was collected, dried with sodium sulfate and concentrated in vacuo. The crude was purified by column chromatography (SiO<sub>2</sub>, cyclohexane:ethyl acetate 8:2 v/v) obtaining the boc-protected amine as a white solid (5.00 gr, 66 %).

**TLC:**  $R_f = 0.15$  (SiO<sub>2</sub>, cyclohexane: ethyl acetate 8:2 v/v)

**<sup>1</sup>H-NMR:** (500 MHz, CD<sub>2</sub>Cl<sub>2</sub>):  $\delta$  7.85 (d,  $J = 8.7$  Hz, 1H), 7.67 (s, 1H), 7.40 (dd,  $J = 8.8, 2.4$  Hz, 1H), 7.31 (d,  $J = 2.4$  Hz, 1H), 4.64 (d,  $J = 5.7$  Hz, 2H), 2.32 – 2.27 (m, 1H), 1.50 (s, 9H).

**<sup>13</sup>C-NMR {1H}:** (126 MHz, CD<sub>2</sub>Cl<sub>2</sub>):  $\delta$  153.31, 137.89, 131.96, 131.80, 131.29, 122.63, 115.42, 80.94, 63.95, 28.42.

**HR-ESI-MS:**  $m/z$  calculated for C<sub>12</sub>H<sub>16</sub>BrNNaO<sub>3</sub> [M+Na]<sup>+</sup>; 324.0206 found 324.0203.

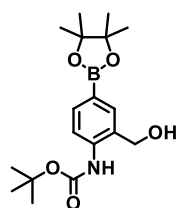

**Compound 3:** Protected amine **5** (2.0 gr, 1 equiv.), B<sub>2</sub>Pin<sub>2</sub> (1.94 mg, 1.15 equiv.) and KOAc (1.30 gr, 2 equiv.) were added to a 100 mL *Schlenk* tube and cycled between vacuum and argon 3 times. 40 mL dry dioxane was added and the mixture was degassed for 15 min. Pd(dddppf)Cl<sub>2</sub> (5 mol%) was added, the tube was sealed and heated to 90°C. After 16 hours the reaction was cooled, filtered over silica and flushed down with EtOAc. The volatiles were removed under reduced pressure and the crude is subjected to column chromatography (SiO<sub>2</sub>, cyclohexane: ethyl acetate 9:1 to 3:1 v/v) obtaining the product in the as a white fluffy solid (2.27 gr, 98 %).

**TLC:**  $R_f = 0.15$  (SiO<sub>2</sub>, cyclohexane: ethyl acetate 6:4 (v/v)).

**<sup>1</sup>H-NMR:** (500 MHz, CD<sub>2</sub>Cl<sub>2</sub>)  $\delta$  8.00 (d,  $J = 8.2$  Hz, 1H), 7.89 (s, 1H), 7.68 (dd,  $J = 8.1, 1.6$  Hz, 1H), 7.55 (d,  $J = 1.5$  Hz, 1H), 4.71 (s, 2H), 2.00 (s, 1H), 1.51 (s, 9H), 1.31 (s, 12H).

**<sup>13</sup>C-NMR {1H}:** (126 MHz, CD<sub>2</sub>Cl<sub>2</sub>)  $\delta$  153.15, 141.71, 136.10, 135.67, 127.66, 119.37, 84.13, 80.76, 64.77, 28.45, 25.07.

**HR-ESI-MS:**  $m/z$  calculated for C<sub>18</sub>H<sub>29</sub>BNO<sub>5</sub> [M+H]<sup>+</sup>; 350.2137 found 350.2132.

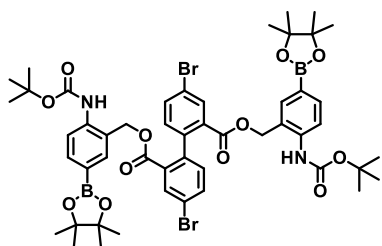

**Compound 1:** To a solution of **3** (2.0 gr, 2.05 equiv.) and Diacid **2** (1.11 gr, 1 equiv.) in dry DCM/DMF (23:4.4 mL) were added, *N,N'*-dicyclohexylcarbodiimide (1.27 gr, 2.2 equiv.) and finally 4-(dimethylamino)pyridine (35 mg, 0.1 equiv.) at room temperature under inert atmosphere. The reaction mixture was stirred at room temperature for 4 hours before it was filtered through a pad of celite and flushed down with DCM. The organic phase was washed

with water (3 times), dried over sodium sulfate and solvents were removed under vacuum. The crude was purified by flash column chromatography on silica gel (cyclohexane : ethyl acetate 9:1→8:2 v/v) obtaining the product as a white fluffy solid (2.87 gr, 97 %), which was used in the next step without further purification. **TLC:**  $R_f = 0.27$  (SiO<sub>2</sub>, cyclohexane: ethyl acetate 6:4 (v/v)).

**<sup>1</sup>H-NMR:** (500 MHz, CD<sub>2</sub>Cl<sub>2</sub>)  $\delta$  7.96 (d,  $J = 2.1$  Hz, 2H), 7.88 (d,  $J = 8.2$  Hz, 2H), 7.73 (dd,  $J = 8.3, 1.6$  Hz, 2H), 7.51 (d,  $J = 1.5$  Hz, 2H), 7.45 (dd,  $J = 8.2, 2.2$  Hz, 2H), 7.05 (s, 2H), 6.87 (d,  $J = 8.1$  Hz, 2H), 5.02 (d,  $J = 1.3$  Hz, 4H), 1.50 (s, 18H), 1.33 (d,  $J = 3.6$  Hz, 24H).

**<sup>13</sup>C-NMR {1H}:** (126 MHz, CD<sub>2</sub>Cl<sub>2</sub>)  $\delta$  165.63, 152.47, 140.65, 140.32, 137.85, 136.45, 134.64, 132.91, 131.51, 130.39, 122.88, 121.36, 120.13, 83.80, 80.62, 64.39, 28.05, 24.71.

**HR-ESI-MS:**  $m/z$  calculated for C<sub>50</sub>H<sub>61</sub>B<sub>2</sub>Br<sub>2</sub>N<sub>2</sub>O<sub>12</sub> [M+Na]<sup>+</sup>; 1061.2774 found 1061.2778.

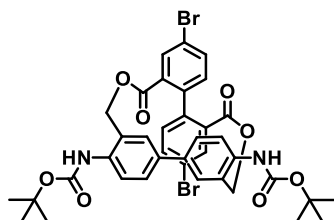

**Compound C<sub>Br<sub>2</sub>NBoc<sub>2</sub></sub> 1** (3.44 gr, 1 equiv.), PdCl<sub>2</sub>PPh<sub>3</sub> (459 mg, 20 mol %) and boric acid (1.20 gr, 6 equiv.) were dissolved a 600 mL toluene/150 mL MeOH mixture. The solution was stirred vigorously for 15 minutes, followed by the addition of 150 mL H<sub>2</sub>O and KF (1.88 gr, 10 equiv.). The reaction mixture was allowed to stir at room temperature for 7 hours open to the air. The mixture was portioned between toluene and water, followed by subsequent extraction of the aqueous phase with

toluene. The combined organic layers were dried over sodium sulfate and concentrated in vacuo. The crude reaction mixture was purified by column chromatography (SiO<sub>2</sub>, cyclohexane: ethyl acetate 9:1→8:2→1:1 v/v) obtaining the product as an off-white powder (1.69 gr, 61 %). **TLC:**  $R_f = 0.17$  (SiO<sub>2</sub>, cyclohexane: ethyl acetate 6:4 (v/v)).

**<sup>1</sup>H-NMR:** (500 MHz, CD<sub>2</sub>Cl<sub>2</sub>)  $\delta$  8.44 – 8.41 (m, 2H), 7.77 – 7.73 (m, 2H), 7.43 (s, 4H), 7.21 – 7.18 (m, 2H), 6.94 (s, 2H), 6.22 (s, 2H), 5.67 (d,  $J = 14.2$  Hz, 2H), 5.04 (d,  $J = 14.3$  Hz, 2H), 1.50 (s, 18H).

**<sup>13</sup>C-NMR {1H}:** (126 MHz, CD<sub>2</sub>Cl<sub>2</sub>)  $\delta$  164.66, 153.60, 143.45, 137.50, 135.42, 134.19, 133.41, 132.99, 130.24, 128.64, 125.51, 125.31, 124.82, 121.63, 81.07, 62.80, 28.40.

**HR-ESI-MS:**  $m/z$  calculated for C<sub>38</sub>H<sub>36</sub>Br<sub>2</sub>N<sub>2</sub>NaO<sub>8</sub> [M+Na]<sup>+</sup>; 829.0731 found 829.0725.

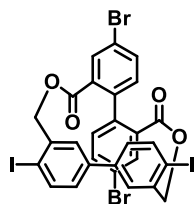

**Compound C<sub>Br<sub>2</sub>I<sub>2</sub></sub>:** To a solution of p-TsOH·H<sub>2</sub>O (579 mg, 6 equiv.) in 2.5 mL toluene and 2.5 mL ACN was added C<sub>Br<sub>2</sub>Nboc<sub>2</sub></sub> (400 mg, 0.495 mmol, 1 equiv.). The mixture was stirred for 4 hours, until full deprotection was observed (LC-MS). The white suspension was cooled to -15°C before a solution of NaNO<sub>2</sub> (137 mg, 4 equiv.) and KI (411 mg, 5 equiv.) in 0.75 mL water was added dropwise. The mixture was stirred on ice for 10 minutes before it was warmed to room temperature. After stirring 1 hour the reaction mixture was diluted with water, sat NaHCO<sub>3</sub> and 40% aq. NaHSO<sub>3</sub>, followed by extraction with toluene. The organics were collected, combined, dried with Na<sub>2</sub>SO<sub>4</sub> and concentrated. The resulting crude was purified by column chromatography (Cyclohexane:CH<sub>2</sub>Cl<sub>2</sub> 9:1 --> 1:1) obtaining the product in the 1st fraction as a white solid (256 mg, 62 %).

**TLC:**  $R_f = 0.18$  (SiO<sub>2</sub>, cyclohexane: dichloromethane 9:1).

**<sup>1</sup>H-NMR:** (500 MHz, CD<sub>2</sub>Cl<sub>2</sub>)  $\delta$  8.44 (d,  $J = 2.1$  Hz, 2H), 7.84 (d,  $J = 8.1$  Hz, 2H), 7.76 (dd,  $J = 8.3, 2.1$  Hz, 2H), 7.20 (d,  $J = 8.2$  Hz, 2H), 7.18 – 7.15 (m, 2H), 6.77 – 6.76 (m, 2H), 5.49 (dt,  $J = 14.8, 1.0$  Hz, 2H), 4.98 (dt,  $J = 14.7, 0.8$  Hz, 2H).

**<sup>13</sup>C-NMR {1H}:** (126 MHz, CD<sub>2</sub>Cl<sub>2</sub>)  $\delta$  164.31, 143.48, 140.60, 139.71, 138.61, 135.64, 134.24, 132.95, 128.34, 126.80, 126.09, 121.69, 93.35, 70.45.

**HR-ESI-MS:**  $m/z$  calculated for C<sub>28</sub>H<sub>16</sub>Br<sub>2</sub>I<sub>2</sub>NaO<sub>4</sub> [M+Na]<sup>+</sup>; 850.7397 found 850.7389.

**FT-IR (ATR)**  $\tilde{\nu}$  [cm<sup>-1</sup>]: 3070 (w), 2906 (w), 1729 (s), 1583 (m), 1551 (m), 1462 (w), 1438 (w), 1424 (w), 1369 (m), 1274 (m), 1229 (s), 1140 (m), 1090 (m), 1073 (s), 1011 (w), 1003 (m), 984 (w), 964 (w), 897 (w), 872 (w), 826 (s), 810 (s), 786 (s), 724 (s), 704 (m), 694 (m), 670 (w), 654 (w), 581 (w), 565 (w), 546 (m), 531 (m), 497 (m), 418 (m).

## Experimental procedures Chromophore library

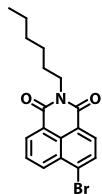

**NI-Br:** 4-bromo-1,8-naphthalic anhydride (1.07 g, 1 equiv.) was treated with n-hexylamine (0.35 mL, 4.83 mmol, 1.25 equiv.) in ethanol (25 mL). The mixture was heated at reflux for 16 hours before cooled down to room temperature. Hydrochloric acid (2M, 10 mL) was added and the mixture was diluted with EtOAc. Phases were separated and the organic phase was collected, dried and concentrated. The crude was purified by silica column chromatography (cyclohexane:CH<sub>2</sub>Cl<sub>2</sub> 7:3 → 1:1 v/v) obtaining the product as a yellow solid (1.3 gr, 93 %).

**TLC:** R<sub>f</sub> = 0.20 (SiO<sub>2</sub>, cyclohexane: dichloromethane 7:3)

**<sup>1</sup>H-NMR:** (400 MHz, CD<sub>2</sub>Cl<sub>2</sub>)  $\delta$  8.61 (dd, *J* = 7.3, 1.1 Hz, 1H), 8.56 (dd, *J* = 8.5, 1.1 Hz, 1H), 8.37 (d, *J* = 7.9 Hz, 1H), 8.04 (d, *J* = 7.9 Hz, 1H), 7.85 (dd, *J* = 8.5, 7.3 Hz, 1H), 4.15 – 4.09 (m, 2H), 1.70 (p, *J* = 7.4 Hz, 2H), 1.45 – 1.27 (m, 6H), 0.92 – 0.86 (m, 3H).

**<sup>13</sup>C-NMR {1H}:** (101 MHz, CD<sub>2</sub>Cl<sub>2</sub>)  $\delta$  163.83, 163.80, 133.37, 132.10, 131.49, 131.32, 130.99, 130.27, 129.37, 128.47, 123.71, 122.89, 40.84, 31.96, 28.36, 27.18, 22.99, 14.22.

**HR-ESI-MS:** *m/z* calculated for C<sub>18</sub>H<sub>18</sub>BrNNaO<sub>2</sub> [M+Na]<sup>+</sup>; 382.0413 found 382.0412.

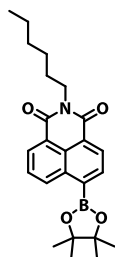

**NI-BPin:** NI-Br (768 mg, 1 equiv.), B<sub>2</sub>Pin<sub>2</sub> (650 mg, 1.2 equiv.) and KOAc (418 mg, 2 equiv.) were added to a 25 mL *Schlenk* tube and cycled between vacuum and argon 3 times. The solids were dispersed in 12 mL dry dioxane followed by degassing with argon for 15 minutes. PdCl<sub>2</sub>(dppf) (78 mg, 5 mol %) was added, the tube sealed and heated to 85 °C for 4 hours. The reaction mixture was cooled down, filtered over a celite pad and the filtrate was concentrated under reduced pressure. The crude was plugged over silica with dichloromethane, obtaining the product as a white-greenish solid (900 mg, 99 %).

**<sup>1</sup>H-NMR:** (500 MHz, CD<sub>2</sub>Cl<sub>2</sub>)  $\delta$  9.12 (dd, *J* = 8.5, 1.1 Hz, 1H), 8.61 – 8.49 (m, 2H), 8.27 (d, *J* = 7.3 Hz, 1H), 7.83 – 7.74 (m, 1H), 4.17 – 4.09 (m, 2H), 1.70 (p, *J* = 7.4 Hz, 2H), 1.44 (s, 12H), 1.43 – 1.28 (m, 6H), 0.95 – 0.86 (m, 3H).

**<sup>13</sup>C-NMR {1H}:** (101 MHz, CD<sub>2</sub>Cl<sub>2</sub>)  $\delta$  164.48, 164.46, 135.97, 135.64, 135.14, 130.91, 129.80, 128.24, 127.37, 125.32, 123.26, 85.01, 40.73, 31.99, 28.40, 27.22, 25.15, 23.00, 14.23.

**HR-ESI-MS:** *m/z* calculated for C<sub>24</sub>H<sub>31</sub>BNO<sub>4</sub> [M+H]<sup>+</sup>; 408.2345 found 408.2341.

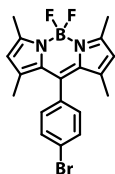

**BY-Br:** At room temperature, a solution of TFA (22  $\mu$ L) in 2 mL of dry-DCM was added to a degassed mixture of 2,4-dimethylpyrrole (0.45 mL, 2.25 equiv.) and 3,5-dibromobenzaldehyde (359 mg, 1 equiv.) in 97 mL dry-DCM under argon atmosphere. The mixture was stirred for 3 hours before it was cooled to 0 °C and a mixture of DDQ (460 mg, 1 equiv.) in 28 mL dry-DCM was added dropwise. After full addition the mixture was heated to room temperature and was stirred for one hour. Et<sub>3</sub>N (3.9 mL, 14 equiv.) was added and the mixture was cooled on ice before BF<sub>3</sub>·Et<sub>2</sub>O (3.9 mL) was added slowly. The reaction was stirred for an additional 2 hours at room temperature. The mixture was washed with sat. Na<sub>2</sub>CO<sub>3</sub> (twice) and the organics were collected, dried over Na<sub>2</sub>SO<sub>4</sub> and evaporated to dryness. The crude product was subjected to silica column chromatography (cyclohexane:CH<sub>2</sub>Cl<sub>2</sub> 6:4) obtaining the product as a red-solid (230 mg, 29 %).

**<sup>1</sup>H-NMR:** (400 MHz, CD<sub>2</sub>Cl<sub>2</sub>)  $\delta$  7.67 (d, *J* = 8.4 Hz, 2H), 7.21 (d, *J* = 8.4 Hz, 2H), 6.03 (s, 2H), 2.51 (s, 6H), 1.43 (s, 6H).

**<sup>13</sup>C-NMR {1H}:** (101 MHz, CD<sub>2</sub>Cl<sub>2</sub>)  $\delta$  156.19, 143.61, 140.73, 134.30, 132.88, 131.58, 130.39, 123.63, 121.76, 14.81, 14.73.

**<sup>19</sup>F-NMR {1H}:** (376 MHz, CD<sub>2</sub>Cl<sub>2</sub>, not referenced)  $\delta$  -146.27 (dd, *J* = 65.8, 33.0 Hz).

**<sup>11</sup>B NMR:** (128 MHz, CD<sub>2</sub>Cl<sub>2</sub>, not referenced)  $\delta$  0.69 (t, *J* = 32.9 Hz).

**HR-ESI-MS:**  $m/z$  calculated for  $C_{19}H_{18}B_2F_2N_2Na$   $[M+H]^+$ ; 425.0610 found 425.0604.

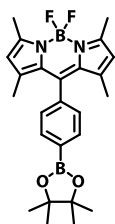

**BY-Bpin: BY-Br** (160 mg, 1 equiv.),  $B_2Pin_2$  (170 mg, 1.5 equiv.) and KOAc (85 mg, 2 equiv.) were added to a 5 mL *Schlenk* tube and cycled between vacuum and argon 3 times. The solids were dispersed in 2.5 mL dry dioxane followed by degassing for 15 minutes.  $PdCl_2(dppf)$  (25 mg, 7 mol %) was added, the tube sealed and heated to 85 °C for 20 hours. The reaction mixture was cooled down, filtered over a silica pad and the filtrate was concentrated under reduced pressure. The obtained crude was plugged over silica with dichloromethane and the obtained solid was washed with heptane, yielding the product as a red-solid (150 mg, 83 %).

**$^1H$ -NMR:** (400 MHz,  $CD_2Cl_2$ )  $\delta$  7.88 (d,  $J = 7.8$  Hz, 2H), 7.31 (d,  $J = 7.9$  Hz, 2H), 6.01 (s, 2H), 2.50 (s, 6H), 1.38 (s, 6H), 1.36 (s, 12H).

**$^{13}C$ -NMR {1H}:** (101 MHz,  $CD_2Cl_2$ )  $\delta$  143.80, 139.08, 138.04, 135.69, 127.77, 121.49, 84.50, 25.25, 14.70, 14.64.

**$^{19}F$ -NMR {1H}:** (376 MHz,  $CD_2Cl_2$ , not referenced)  $\delta$  -146.28 (dd,  $J = 65.9, 33.1$  Hz).

**$^{11}B$  NMR:** (128 MHz,  $CD_2Cl_2$ , not referenced)  $\delta$  30.38, 0.71 (t,  $J = 32.9$  Hz).

**HR-ESI-MS:**  $m/z$  calculated for  $C_{25}H_{30}B_2F_2N_2NaO_2$   $[M+Na]^+$ ; 473.2362 found 473.2357.

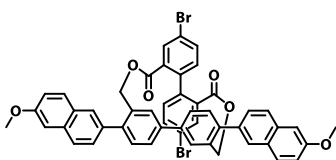

**Compound  $C_{Br_2Naph_2}$ :  $C_{Br_2}$**  (30.2 mg, 1. equiv.), 6-Methoxy-naphthalene boric acid (16.4 mg, 2.2 equiv) and  $K_2CO_3$  (25.0 mg, 5 equiv.) were added to a 10 mL *Schlenk* tube and dispersed in 4 mL of a 4:1:4 mixture of toluene:EtOH:H<sub>2</sub>O. The mixture was degassed with argon for 15 minutes, before  $PdCl_2(dppf)$  (10 mol%) was added. The tube was sealed and heated at 60 °C for 17 hours. The reaction was cooled to r.t. and extracted with  $CH_2Cl_2$ .

Organic phases were dried with  $Na_2SO_4$ , filtered and concentrated under reduced pressure. The crude was purified by column chromatography ( $SiO_2$ , cyclohexane: $CH_2Cl_2$  8:2  $\rightarrow$  1:1) obtaining the product (21.3 mg, 62 %) as a white solid.

**TLC:**  $R_f = 0.24$  ( $SiO_2$ , cyclohexane: dichloromethane 1:1).

**$^1H$ -NMR:** (500 MHz,  $CD_2Cl_2$ ):  $\delta$  8.39 (d,  $J = 2.1$  Hz, 2H), 7.85 (d,  $J = 8.4$  Hz, 2H), 7.80 (d,  $J = 8.9$  Hz, 2H), 7.75 (d,  $J = 2.0$  Hz, 3H), 7.73 (d,  $J = 2.1$  Hz, 1H), 7.67 (dd,  $J = 7.9, 2.0$  Hz, 2H), 7.47 (dd,  $J = 8.3, 1.8$  Hz, 2H), 7.43 (d,  $J = 7.8$  Hz, 2H), 7.32 (d,  $J = 1.9$  Hz, 2H), 7.25 – 7.16 (m, 6H), 5.90 (d,  $J = 14.0$  Hz, 2H), 4.96 (d,  $J = 14.0$  Hz, 2H), 3.95 (s, 6H).

**$^{13}C$ -NMR {1H}:** (126 MHz,  $CD_2Cl_2$ ): (126 MHz,  $CD_2Cl_2$ )  $\delta$  165.00, 158.50, 143.66, 139.65, 139.54, 135.41, 135.18, 134.77, 134.25, 134.14, 132.80, 131.00, 129.91, 129.13, 128.94, 128.14, 128.08, 127.31, 125.93, 125.09, 121.53, 119.71, 106.00, 64.46, 55.76.

**HR-ESI-MS:**  $m/z$  calculated for  $C_{50}H_{34}Br_2NaO_6$   $[M+Na]^+$ ; 911.0614 found 911.0605.

**FT-IR (ATR)**  $\tilde{\nu}$  [ $cm^{-1}$ ]: 3060 (w), 2967 (m), 2902 (m), 2837 (w), 1725 (s), 1633 (w), 1605 (m), 1554 (w), 1495 (m), 1463 (w), 1388 (m), 1372 (m), 1269 (m), 1232 (s), 1204 (s), 1145 (m), 1082 (m), 1070 (s), 1031 (m), 1003 (m), 916 (w), 892 (w), 856 (w), 830 (m), 806 (m), 787 (m), 716 (w), 675 (w), 654 (w), 569 (w), 548 (w), 522 (w), 476 (m).

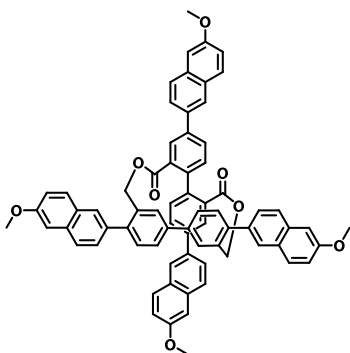

**Compound  $C_{Naph_4}$ : Route 1 (two-fold Suzuki):** A 5 ml *Schlenk* tube was charged with  $C_{Br_2Naph_2}$  (21.3 mg, 1 equiv.), Methoxy-naphthalene boric acid (11.6 mg, 2.4 equiv.) and  $K_2CO_3$  (16.4 mg, 5 equiv.) in 2.5 mL of a mixture of toluene:EtOH:H<sub>2</sub>O (4/1/4 v/v/v). The mixture was degassed for 15 min with argon and  $PdCl_2(dppf)$  (10 mol %) was added. The reaction mixture was heated at 85 °C for 24 hours. After completion the mixture was cooled down and extracted with  $CH_2Cl_2$ . The combined organic layers were dried over  $Na_2SO_4$  and evaporated under reduced pressure. The crude product was purified by a column chromatography ( $SiO_2$ , cyclohexane:DCM; 1:1 v/v) collecting the 2<sup>nd</sup> peak. After concentration the solid was triturated with diethylether yielding the product as a white solid (13.2 mg, 47 %).

**Route 2 (four-fold Suzuki):** A 10 mL *Schlenk* tube was charged with **C<sub>Br<sub>2</sub>I<sub>2</sub></sub>** (29.8 mg, 1 equiv.), 6-methoxy naphthalene boric acid (40.2 mg, 5.5 equiv.) and K<sub>2</sub>CO<sub>3</sub> (40 mg, 8 equiv.). The solids were dispersed in a 6 mL mixture of toluene/EtOH/H<sub>2</sub>O v/v/v 4:1:1 and the solution was degassed with Argon for 15 minutes. PdCl<sub>2</sub>(dppf) 20 mol% was added, the tube sealed and the mixture was heated to 85°C for 16 hours. After completion the mixture was cooled to r.t. diluted with toluene and washed with water. Organics were concentrated in vacuo and the crude was purified by silica column chromatography (cyclohexane:DCM; 1:1 v/v) obtaining the product as a white solid (21 mg, 56 %).

**TLC:** R<sub>f</sub> = 0.19 (SiO<sub>2</sub>, cyclohexane:dichloromethane 4:6).

**<sup>1</sup>H-NMR:** (500 MHz, THF-d<sub>8</sub>) δ 8.64 (d, *J* = 2.0 Hz, 2H), 8.15 (s, 2H), 8.02 (dd, *J* = 8.0, 2.0 Hz, 2H), 7.87 – 7.79 (m, 12H), 7.68 (dd, *J* = 7.9, 1.7 Hz, 2H), 7.49 (d, *J* = 8.4 Hz, 4H), 7.45 (d, *J* = 8.0 Hz, 2H), 7.40 (d, *J* = 7.8 Hz, 2H), 7.29 (d, *J* = 2.4 Hz, 2H), 7.24 (d, *J* = 2.4 Hz, 2H), 7.19 – 7.11 (m, 4H), 5.96 (d, *J* = 14.4 Hz, 2H), 5.01 (d, *J* = 14.3 Hz, 2H), 3.92 (s, 6H), 3.90 (s, 6H).

**<sup>13</sup>C-NMR {1H}:** (126 MHz, THF-d<sub>8</sub>) δ 166.32, 159.38, 159.32, 145.36, 141.13, 140.32, 140.22, 136.11, 136.04, 135.43, 135.19, 132.98, 131.33, 131.17, 130.64, 130.51, 130.45, 130.09, 128.76, 128.72, 128.56, 128.38, 127.89, 126.57, 126.51, 126.44, 125.28, 120.25, 120.16, 106.47, 55.70, 55.67.

**HR-ESI-MS:** *m/z* calculated for C<sub>72</sub>H<sub>52</sub>NaO<sub>8</sub> [M+Na]<sup>+</sup>; 1067.3554 found 1067.3553.

**FT-IR (ATR)**  $\tilde{\nu}$  [cm<sup>-1</sup>]: 3065 (w), 2996(w), 2955 (m), 2935 (m), 2842 (w), 1724 (s), 1632 (w), 1604 (m), 1495 (s), 1465 (w), 1452 (w), 1391 (w), 1375 (w), 1304 (w), 1271 (w), 1251 (m), 1225 (s), 1203 (s), 1153 (m), 1071 (s), 1033 (m), 1005 (w), 916 (w), 891 (w), 840 (m), 834 (w), 808 (w), 796 (w), 788 (w), 684 (w), 522 (w), 473 (m).

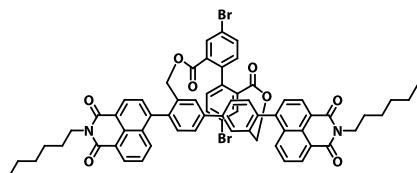

**Compound C<sub>Br<sub>2</sub>NI<sub>2</sub>: Racemate synthesis:</sub>** A 10 mL *Schlenk* tube was charged with **C<sub>Br<sub>2</sub>I<sub>2</sub></sub>** (60 mg, 1 equiv.), **NI-Bpin** (63.5 mg, 2.05 equiv.) and K<sub>2</sub>CO<sub>3</sub> (50 mg, 5 equiv.). The solids were dispersed in a 5 mL mixture of THF/H<sub>2</sub>O 4:1 and the solution was degassed with Argon for 15 minutes. PdCl<sub>2</sub>(dppf) 10 mol% was added, the

tube sealed and the mixture heated to 55°C for 4.5 hours. After completion the mixture was cooled to r.t. diluted with EtOAc and water. The phases were separated and the organics were concentrated in vacuo. The crude was purified by silica column chromatography (cyclohexane:CH<sub>2</sub>Cl<sub>2</sub> 4:6) collecting the 1<sup>st</sup> band. The obtained solid was triturated with DCM/MeOH to obtain the product (50 mg, 61 %) as an ivory white solid.

**Enantiopure synthesis (P)-C<sub>Br<sub>2</sub>NI<sub>2</sub>:</sub>** A 5 mL *Schlenk* tube was charged with (P)- **C<sub>Br<sub>2</sub>I<sub>2</sub></sub>** (28.7 mg, 1 equiv.), **NI-Bpin** (29.6 mg, 2.05 equiv.) and K<sub>2</sub>CO<sub>3</sub> (23.9 mg, 5 equiv.). The solids were dispersed in a 2.5 mL mixture of THF/H<sub>2</sub>O 4:1 and the solution was degassed with Argon for 15 minutes. PdCl<sub>2</sub>(dppf) 10 mol% was added, the tube sealed and the mixture heated to 55°C for 6 hours. After completion the mixture was cooled to r.t. diluted with EtOAc and water. The phases were separated and the organics were dried over Na<sub>2</sub>SO<sub>4</sub>, filtered and concentrated in vacuo. The crude was purified by silica column chromatography (cyclohexane:CH<sub>2</sub>Cl<sub>2</sub> 4:6) collecting the 3<sup>rd</sup> band. The obtained solid was subjected to GPC (chloroform) obtaining the product (20 mg, 51 %) as an ivory white solid.

**TLC:** R<sub>f</sub> = 0.18 (SiO<sub>2</sub>, Cyclohexane:CH<sub>2</sub>Cl<sub>2</sub>4:6)

**<sup>1</sup>H-NMR:** (500 MHz, CD<sub>2</sub>Cl<sub>2</sub>) δ 8.72 – 8.65 (m, 2H), 8.65 – 8.57 (m, 2H), 8.37 (dd, *J* = 8.7, 2.1 Hz, 1H), 8.32 (dd, *J* = 7.5, 2.1 Hz, 1H), 8.05 (ddd, *J* = 8.3, 7.1, 1.1 Hz, 1H), 7.91 – 7.82 (m, 2H), 7.81 – 7.76 (m, 3H), 7.75 – 7.66 (m, 4H), 7.51 – 7.38 (m, 4H), 7.12 (td, *J* = 8.2, 1.7 Hz, 2H), 5.70 (t, *J* = 14.5 Hz, 1H), 5.50 (dd, *J* = 18.4, 14.0 Hz, 1H), 4.57 (dd, *J* = 18.4, 14.2 Hz, 1H), 4.44 (dd, *J* = 14.0, 9.4 Hz, 1H), 4.24 – 4.15 (m, 4H), 1.80 – 1.70 (m, 4H), 1.49 – 1.41 (m, 4H), 1.41 – 1.31 (m, 8H), 0.91 (t, *J* = 7.0 Hz, 6H).

**<sup>13</sup>C-NMR {1H}:** (151 MHz, CD<sub>2</sub>Cl<sub>2</sub>) δ 164.90, 164.83, 164.78, 164.73, 164.38, 164.33, 164.19, 144.16, 143.92, 143.67, 143.56, 141.02, 140.84, 140.72, 140.55, 135.97, 135.94, 135.90, 135.84, 135.62, 135.58, 134.07, 132.84, 132.70, 132.45, 132.40, 132.24, 131.58, 131.44, 131.18, 131.09, 130.90, 130.79, 130.71, 128.90, 128.69, 128.61, 128.55, 128.23, 128.21, 127.80, 127.73, 127.09, 126.47, 126.44, 125.84, 125.47, 125.25, 123.63, 123.16, 121.53, 63.96, 63.92, 63.84, 63.80, 40.79, 32.00, 28.43, 27.21, 23.01, 14.24.

**HR-ESI-MS:** *m/z* calculated for C<sub>64</sub>H<sub>53</sub>Br<sub>2</sub>N<sub>2</sub>O<sub>8</sub> [M+H]<sup>+</sup>; 135.2163 found 135.2164.



**FT-IR (ATR)**  $\tilde{\nu}$  [cm<sup>-1</sup>]: 3065 (w), 2958 (m), 2927 (m), 2853 (m), 1729 (m), 1699 (s), 1657 (s), 1616 (w), 1589 (m), 1464 (w), 1386 (w), 1353 (s), 1293 (w), 1274 (w), 1228 (s), 1176 (w), 1147 (w), 1092 (m), 1069 (m), 1002 (w), 822 (m), 784 (s), 759 (m).

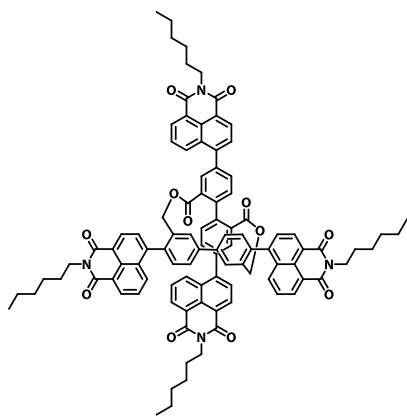

**Compound C<sub>Ni4</sub>: Racemate synthesis:** C<sub>Br<sub>2</sub>l<sub>2</sub></sub> (19 mg, 1 equiv.), **NI-Bpin** (60 mg, 6 equiv.) and K<sub>2</sub>CO<sub>3</sub> (30 mg, 10 equiv.) were added to a 10 mL *Schlenk*. 4 mL of a 4:1:1 mixture of toluene/EtOH/H<sub>2</sub>O was added the solution was degassed with Argon for 15 minutes. PdCl<sub>2</sub>(dppf) 20 mol% was added, the tube sealed and the mixture heated to 85 °C for 18 hours. After completion the mixture was cooled to r.t. diluted with toluene and water. The phases were separated and the organics were concentrated in vacuo. The crude was subjected to silica column chromatography (cyclohexane:CH<sub>2</sub>Cl<sub>2</sub> 4:6 → 0:10) collecting the band. The obtained solid after concentration was purified by GPC with chloroform as mobile phase obtaining the product (10 mg, 27 %) as a white solid.

as a white solid.

**Enantiopure synthesis (P)-C<sub>Ni4</sub>:** (P)-C<sub>Br<sub>2</sub>Ni<sub>2</sub></sub> (15 mg, 1 equiv.), **NI-Bpin** (17 mg, 3 equiv.) and K<sub>2</sub>CO<sub>3</sub> (10 mg, 5 equiv.) were added to a 5 mL *Schlenk* flask. 1.25 mL of a 4:1 mixture of dioxane/H<sub>2</sub>O was added followed by degassing with Argon for 15 minutes. PdCl<sub>2</sub>(dppf) 10 mol% was added, the tube sealed and the mixture heated to 85 °C for 16 hours. After completion the mixture was cooled to r.t. diluted with EtOAc and water. The phases were separated and the organics were concentrated in vacuo. The crude was subjected to silica column chromatography (CH<sub>2</sub>Cl<sub>2</sub> isocratic). The obtained solid after concentration was purified by GPC with chloroform as mobile phase obtaining the product (2.5 mg, 12 %) as a white solid. **TLC:** R<sub>f</sub> = 0.15 (SiO<sub>2</sub>, CH<sub>2</sub>Cl<sub>2</sub>).

**<sup>1</sup>H-NMR:** (500 MHz, CD<sub>2</sub>Cl<sub>2</sub>) δ 8.69 – 8.59 (m, 6H), 8.50 – 8.42 (m, 3H), 8.34 (dd, *J* = 8.4, 5.5 Hz, 2H), 7.95 (ddd, *J* = 8.3, 6.2, 1.1 Hz, 1H), 7.92 – 7.64 (m, 13H), 7.63 – 7.54 (m, 4H), 7.49 (ddd, *J* = 9.8, 8.4, 7.3 Hz, 1H), 7.45 – 7.39 (m, 2H), 5.77 (dd, *J* = 14.4, 7.8 Hz, 1H), 5.57 (dd, *J* = 14.6, 9.3 Hz, 1H), 4.60 (t, *J* = 14.0 Hz, 1H), 4.48 (dd, *J* = 14.4, 4.7 Hz, 1H), 4.17 (q, *J* = 7.0 Hz, 8H), 1.73 (p, *J* = 7.4 Hz, 8H), 1.43 (t, *J* = 6.7 Hz, 8H), 1.41 – 1.31 (m, 16H), 0.94 – 0.88 (m, 12H).

**<sup>13</sup>C-NMR {1H}:** (151 MHz, CD<sub>2</sub>Cl<sub>2</sub>) δ 165.93, 165.87, 165.83, 165.77, 164.37, 164.36, 164.29, 164.25, 164.18, 164.13, 145.63, 145.59, 145.47, 145.44, 145.35, 145.31, 144.14, 143.84, 140.87, 140.73, 140.61, 140.46, 138.58, 138.54, 135.98, 135.96, 135.92, 135.90, 135.84, 135.81, 135.78, 133.99, 132.69, 132.64, 132.35, 132.21, 131.89, 131.76, 131.43, 131.37, 131.22, 131.10, 131.05, 131.02, 130.86, 130.67, 130.23, 129.07, 128.86, 128.71, 128.65, 128.51, 128.18, 127.79, 127.56, 127.53, 127.50, 127.45, 126.81, 126.46, 126.41, 126.04, 125.36, 125.32, 125.19, 123.65, 123.63, 123.60, 123.52, 123.13, 123.12, 122.90, 122.87, 122.83, 63.90, 63.82, 40.77, 31.98, 28.41, 27.22, 27.19, 23.00, 14.23.

**HR-ESI-MS:** *m/z* calculated for C<sub>200</sub>H<sub>176</sub>N<sub>8</sub>Na<sub>2</sub>O<sub>24</sub> [2M+2Na]<sup>2+</sup>; 1559.6291 found 1559.6321.

**FT-IR (ATR)**  $\tilde{\nu}$  [cm<sup>-1</sup>]: 3072 (w), 2954 (m), 2928 (m), 2858 (m), 1725 (m), 1700 (s), 1657 (s), 1616 (w), 1589 (m), 1441 (w), 1386 (w), 1349 (s), 1300 (w), 1228 (s), 1179 (w), 1153 (w), 1095 (w), 1069 (m), 1003 (w), 843(w), 824 (w), 782 (s), 757 (m), 651 (w) 586 (w).

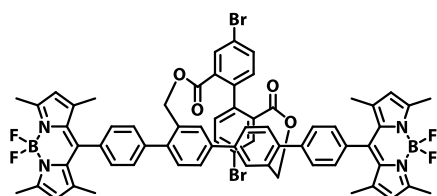

**Compound C<sub>Br<sub>2</sub>BY<sub>2</sub></sub>:** A 10 mL *Schlenk* tube was charged with C<sub>Br<sub>2</sub>l<sub>2</sub></sub> (63 mg, 1 equiv.), **BY-Bpin** (71 mg, 2.05 equiv.) and K<sub>2</sub>CO<sub>3</sub> (70 mg, 7 equiv.). The solids were dispersed in a 5 mL mixture of THF/H<sub>2</sub>O 4:1 and the solution was degassed with Argon for 15 minutes. PdCl<sub>2</sub>(dppf) 12 mol% was added, the tube sealed and the mixture heated to 55°C for 4 hours. The mixture was cooled to r.t. and the orange precipitate was filtered and washed with water and methanol, yielding the product (85 mg, 90 %).

**<sup>1</sup>H-NMR:** (500 MHz, CD<sub>2</sub>Cl<sub>2</sub>) δ 8.42 (d, *J* = 2.1 Hz, 2H), 7.76 (dd, *J* = 8.3, 2.1 Hz, 2H), 7.68 (dd, *J* = 7.9, 1.8 Hz, 2H), 7.51 (d, *J* = 8.3 Hz, 4H), 7.42 (dd, *J* = 8.1, 4.8 Hz, 6H), 7.26 (d, *J* = 1.3 Hz, 2H), 7.19 (d, *J* = 8.3 Hz, 2H), 6.06 (s, 4H), 5.83 (d, *J* = 14.2 Hz, 2H), 4.88 (d, *J* = 14.1 Hz, 2H), 2.53 (s, 12H), 1.51 (s, 12H).

**<sup>13</sup>C-NMR {1H}:** (151 MHz, CD<sub>2</sub>Cl<sub>2</sub>) δ 164.89, 155.92, 143.64, 141.82, 140.78, 139.81, 138.66, 135.53, 134.65, 134.28, 134.15, 132.80, 131.76, 130.76, 130.19, 128.73, 128.68, 125.50, 125.08, 121.64, 121.57, 64.26, 14.73, 14.69.

**<sup>19</sup>F-NMR {1H}:** (376 MHz, CD<sub>2</sub>Cl<sub>2</sub>, not referenced) -146.24 (dd, *J* = 66.3, 32.7 Hz)

**<sup>11</sup>B NMR:** (128 MHz, CD<sub>2</sub>Cl<sub>2</sub>, not referenced) 0.75 (t, *J* = 33.0 Hz)

**HR-ESI-MS:** *m/z* calculated for C<sub>132</sub>H<sub>105</sub>B<sub>4</sub>Br<sub>4</sub>F<sub>8</sub>N<sub>8</sub>O<sub>8</sub> [2M+H]<sup>+</sup>; 2441.5087 found 2441.5071.

**FT-IR (ATR)**  $\tilde{\nu}$  [cm<sup>-1</sup>]: 2980 (m), 2920 (m), 1729 (s), 1545 (s), 1513 (s), 1468 (m), 1437 (w), 1409 (m), 1373 (w), 1307 (w), 1234 (m), 1192 (s), 1154 (m), 1077 (s), 1053 (m), 1003 (w), 976 (s), 899 (w), 822 (m), 787 (m), 773 (w), 718 (s), 643 (w), 582 (w), 478 (s).

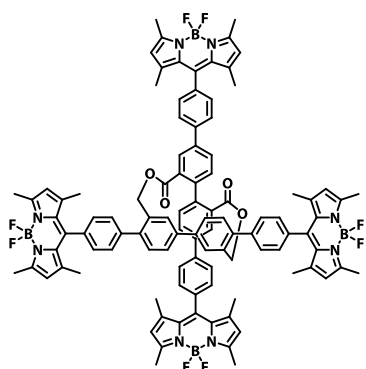

**Compound C<sub>BY4</sub>:** To a 5 mL *Schlenk* tube was added C<sub>Br<sub>2</sub>BY<sub>2</sub></sub> (21 mg, 1 equiv.), **BY-Bpin** (19 mg, 2.5 equiv.), K<sub>2</sub>CO<sub>3</sub> (20 mg, 10 equiv.) and 2.5 mL dioxane/H<sub>2</sub>O (4/1). The suspension was degassed with Argon, followed by the addition of PdCl<sub>2</sub>(dppf) (10 mol%). The tube was sealed and heated at 90 °C for 24 hours. The mixture was cooled and partitioned between CH<sub>2</sub>Cl<sub>2</sub> and water. The organics were collected, dried over sodium sulphate and concentrated. The crude was purified by silica column chromatography (cyclohexane:CH<sub>2</sub>Cl<sub>2</sub> 2:8 → 0:10) obtaining the product (6 mg, 21 %) as a red solid.

**TLC:** R<sub>f</sub> = 0.15 (SiO<sub>2</sub>, dichloromethane 100 %)

**<sup>1</sup>H-NMR:** (500 MHz, CD<sub>2</sub>Cl<sub>2</sub>) δ 8.66 (d, *J* = 1.9 Hz, 2H), 8.01 (dd, *J* = 8.0, 2.0 Hz, 2H), 7.92 – 7.87 (m, 4H), 7.67 (dd, *J* = 7.9, 1.7 Hz, 2H), 7.53 – 7.49 (m, 6H), 7.45 – 7.39 (m, 10H), 7.34 (s, 2H), 6.04 (d, *J* = 13.9 Hz, 8H), 5.87 (d, *J* = 14.6 Hz, 2H), 4.96 (d, *J* = 14.4 Hz, 2H), 2.53 (s, 12H), 2.52 (s, 12H), 1.51 (s, 12H), 1.46 (s, 12H).

**<sup>13</sup>C-NMR {1H}:** (151 MHz, CD<sub>2</sub>Cl<sub>2</sub>) δ 165.93, 155.93, 155.87, 145.04, 143.70, 143.62, 141.83, 141.79, 140.84, 140.63, 139.82, 139.61, 138.46, 134.82, 134.65, 134.40, 132.16, 131.75, 131.72, 130.85, 130.74, 130.13, 129.74, 129.15, 128.73, 128.05, 127.60, 125.19, 124.95, 121.65, 121.57, 64.18, 14.75, 14.73, 14.71, 14.69.

**<sup>19</sup>F-NMR {1H}:** (376 MHz, CD<sub>2</sub>Cl<sub>2</sub>, not referenced) δ -146.25 (dd, *J* = 65.7, 32.1 Hz)

**<sup>11</sup>B NMR:** (128 MHz, CD<sub>2</sub>Cl<sub>2</sub>, not referenced) δ 0.73 (t, *J* = 32.9 Hz)

**HR-ESI-MS:** *m/z* calculated for C<sub>208</sub>H<sub>176</sub>B<sub>8</sub>F<sub>16</sub>N<sub>16</sub>Na<sub>2</sub>O<sub>8</sub> [2M+2Na]<sup>2+</sup>; 1731.7104 found 1731.7131.

**FT-IR (ATR)**  $\tilde{\nu}$  [cm<sup>-1</sup>]: 2972 (m), 2924 (m), 1719 (s), 1543 (s), 1511 (s), 1473 (m), 1442 (w), 1409 (m), 1372 (w), 1304 (s), 1229 (w), 1193 (m), 1158 (m), 1121 (w), 1076 (s), 1054 (m), 1006 (w), 976 (s), 821 (m), 797 (w), 770 (w), 715 (m), 643 (w), 582 (w), 479 (s).

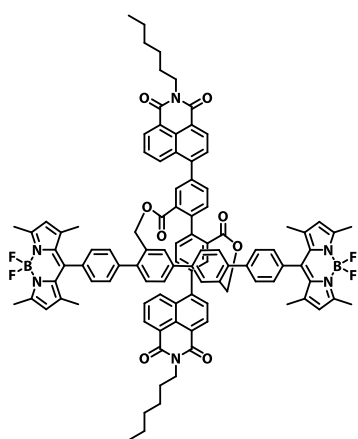

**Compound C<sub>Ni<sub>2</sub>BY<sub>2</sub></sub>:** A 5 mL *Schlenk* tube was charged with C<sub>Br<sub>2</sub>BY<sub>2</sub></sub> (16 mg, 1 equiv.), **Ni-Bpin** (17 mg, 2.5 equiv.) and K<sub>2</sub>CO<sub>3</sub> (14 mg, 6 equiv.). The solids were dispersed in a mixture of dioxane (1.8 mL, DMF (0.2 mL) and H<sub>2</sub>O (0.5 mL) and the solution was degassed with argon. PdCl<sub>2</sub>(dppf) 10 mol% was added, the tube sealed and the mixture heated to 90°C for 16 hours. The mixture was cooled to r.t. diluted with EtOAc and water. The phases were separated and the organics were washed with brine two times, before dried over sodium sulphate and concentrated in vacuo. The crude was purified by silica column chromatography (cyclohexane:CH<sub>2</sub>Cl<sub>2</sub>:EtOAc 2:8:0 → 0:9:1) obtaining the product as an orange solid (13 mg, 61 %).

**TLC:** R<sub>f</sub> = 0.38 (SiO<sub>2</sub>, dichloromethane 100 %)

**<sup>1</sup>H-NMR:** (500 MHz, CD<sub>2</sub>Cl<sub>2</sub>) δ 8.65 (d, *J* = 7.5 Hz, 2H), 8.63 (dd, *J* = 7.3, 1.0 Hz, 2H), 8.52 (d, *J* = 1.9 Hz, 2H), 8.38 (dd, *J* = 8.5, 1.0 Hz, 2H), 7.88 – 7.85 (m, 4H), 7.77 (dd, *J* = 8.5,

7.3 Hz, 2H), 7.69 (dd,  $J = 7.9, 1.6$  Hz, 2H), 7.63 (d,  $J = 7.9$  Hz, 2H), 7.50 (d,  $J = 8.1$  Hz, 4H), 7.43 – 7.38 (m, 8H), 6.04 (s, 4H), 5.89 (d,  $J = 14.5$  Hz, 2H), 4.92 (d,  $J = 14.4$  Hz, 2H), 4.20 – 4.13 (m, 4H), 2.52 (s, 12H), 1.73 (p,  $J = 7.5$  Hz, 4H), 1.48 (s, 12H), 1.46 – 1.31 (m, 12H), 0.93 – 0.86 (m, 6H).

**$^{13}\text{C-NMR}$  {1H}**: (101 MHz,  $\text{CD}_2\text{Cl}_2$ )  $\delta$  165.93, 164.42, 164.22, 145.55, 145.48, 143.62, 141.78, 140.77, 139.84, 139.81, 139.73, 138.64, 134.70, 134.43, 133.91, 132.72, 132.47, 131.88, 131.76, 131.37, 130.89, 130.82, 130.34, 130.14, 129.10, 128.76, 128.56, 127.61, 127.57, 125.51, 125.07, 123.63, 122.86, 121.67, 64.20, 40.79, 32.00, 28.42, 27.22, 23.00, 14.73, 14.68, 14.23.

**$^{19}\text{F-NMR}$  {1H}**: (376 MHz,  $\text{CD}_2\text{Cl}_2$ , not referenced)  $\delta$  -146.26 (dd,  $J = 65.6, 30.5$  Hz)

**$^{11}\text{B NMR}$** : (128 MHz,  $\text{CD}_2\text{Cl}_2$ , not referenced)  $\delta$  0.73 (t,  $J = 33.0$  Hz)

**HR-ESI-MS**:  $m/z$  calculated for  $\text{C}_{204}\text{H}_{176}\text{B}_4\text{F}_8\text{N}_{12}\text{Na}_2\text{O}_{16}$   $[2\text{M}+2\text{Na}]^{2+}$ ; 1645.6713 found 1645.6731.

**FT-IR (ATR)**  $\tilde{\nu}$  [ $\text{cm}^{-1}$ ]: 3037 (w), 2958 (m), 2928 (m), 2858 (m) 1734 (m), 1704 (s), 1663 (s), 1592 (m), 1546 (s), 1514 (s), 1477 (m), 1442 (w), 1410 (w), 1388 (w), 1360 (m), 1308 (m), 1236 (m), 1187 (s), 1158 (s), 1121 (w), 1077 (m), 1052 (w), 975 (s), 837 (w), 819 (w), 786 (s), 772 (m), 760 (m), 718 (m), 643 (w), 586 (w), 479 (s).

### Procedure template cleavage

Chromophore **C<sub>chromophore4</sub>** was dissolved in a THF/MeOH (5/1) mixture [ $c \sim 10^{-6}$ ]. To the solution 2M LiOH (20 vol %) solution was added and stirred at room temperature overnight.  $\text{CH}_2\text{Cl}_2$  and conc. HCl were added and the phases were separated. The organics were collected, dried over sodium sulphate, and concentrated under reduced pressure. The obtained solids were taken up in  $\text{CH}_2\text{Cl}_2$  and fluorescence spectra were recorded.

# Physico-Chemical analysis

## Characterization $C_{Br_2I_2}$

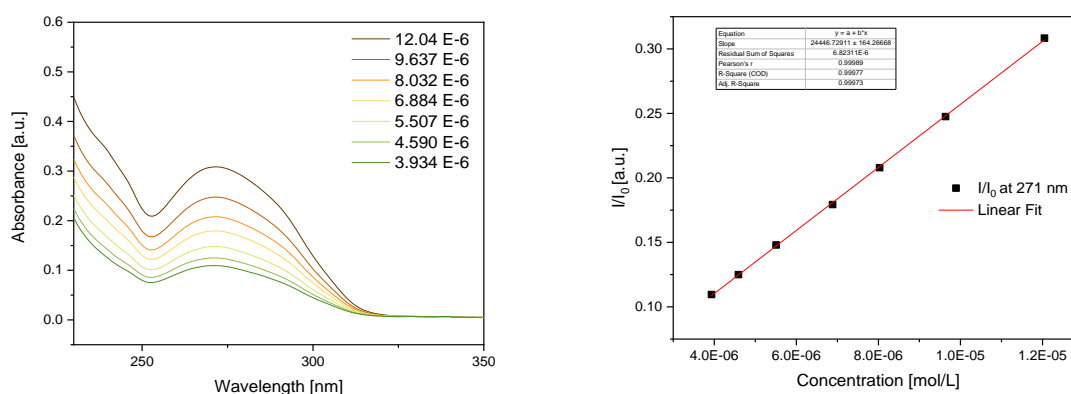

**Figure S1:** Dilution series of the absorption (left) and linear regression (right) of the absorption at 271 nm versus concentration of  $C_{Br_2I_2}$  in  $CH_2Cl_2$ .

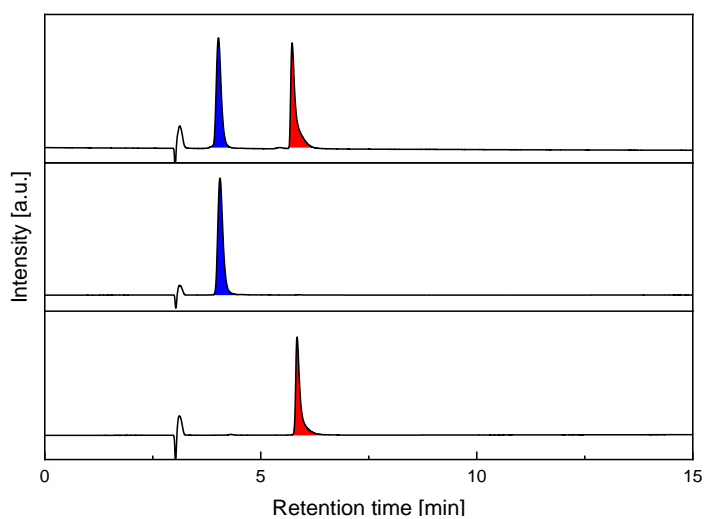

**Figure S2:** HPLC chromatogram of  $rac-C_{Br_2I_2}$  (top) and its respective preparative isolated enantiomers (E1, middle and E2, bottom). IG-column,  $CH_2Cl_2$ /heptane 1/1, 20 °C.

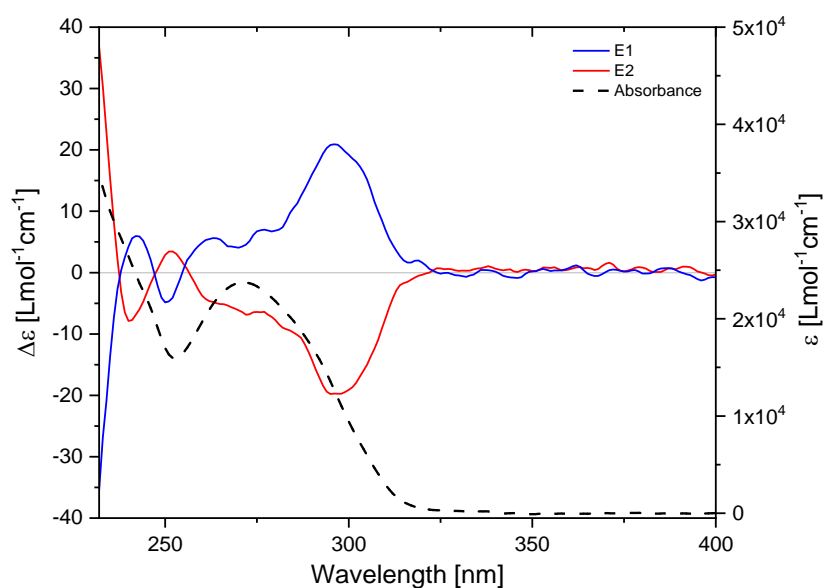

**Figure S3:** Absorptivity and CD-spectra of the first eluting E1 and second eluting E2 enantiomer of  $C_{Br_2}$  in  $CH_2Cl_2$ .

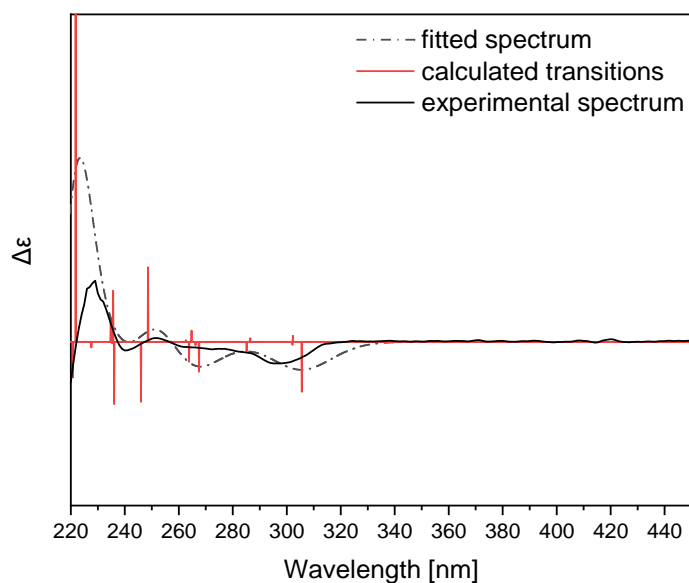

**Figure S4.** Calculated (dash-dot line, fitted with  $\sigma = 0.2$  eV, shifted by 0.7 eV) and experimental (black solid line) spectrum of E2/(P)- $C_{Br_2}$ . The computed transitions are indicated as bars (red).

## Characterization chromophores

**Table S1.** Overview of the (chiro)-optical properties of the library of compounds, measured in CH<sub>2</sub>Cl<sub>2</sub> at 20 °C.

| Compound                                          | $\lambda_{\text{abs}}$ [nm] | $\epsilon$ [L* $\text{mol}^{-1}$ * $\text{cm}^{-1}$ ] | $\lambda_{\text{em}}$ [nm] | $\phi_f^*$         | $\tau_f$ [ns]                                   | $g_{\text{abs}}$                                                      |
|---------------------------------------------------|-----------------------------|-------------------------------------------------------|----------------------------|--------------------|-------------------------------------------------|-----------------------------------------------------------------------|
| <b>C<sub>Br<sub>2</sub>l<sub>2</sub></sub></b>    | 271                         | 24446                                                 | /                          | /                  | /                                               | 1.5*10 <sup>-3</sup><br>(305 nm)                                      |
| <b>C<sub>Br<sub>2</sub>Naph<sub>2</sub></sub></b> | 275; 302                    | 42094; 36304                                          | 378                        | 2.7 %<br>(300 nm)  | 0.36; 4.63                                      | 1.1*10 <sup>-4</sup><br>(305 nm)                                      |
| <b>C<sub>Naph<sub>4</sub></sub></b>               | 264; 303                    | 101009; 60934                                         | 432                        | 43.3 %<br>(300 nm) | 1.76                                            | 3.49*10 <sup>-4</sup><br>(326 nm)                                     |
| <b>C<sub>Br<sub>2</sub>NI<sub>2</sub></sub></b>   | 344; 357                    | 36368; 38971                                          | 441                        | 51.8 %<br>(357 nm) | 1.74                                            | 8.59*10 <sup>-4</sup><br>(296 nm)                                     |
| <b>C<sub>NI<sub>4</sub></sub></b>                 | 346; 357                    | 75211; 80821                                          | 438                        | 54.9 %<br>(357 nm) | 1.74                                            | 7.31*10 <sup>-4</sup><br>(250 nm)<br>1.8*10 <sup>-4</sup><br>(372 nm) |
| <b>C<sub>Br<sub>2</sub>BY<sub>2</sub></sub></b>   | 280 ; 502                   | 50455; 168551                                         | 513                        | 56.5 %<br>(280 nm) | 3.96 (470 nm)<br>4.12 (280 nm)                  | 1.9*10 <sup>-4</sup><br>(508 nm)                                      |
| <b>C<sub>BY<sub>4</sub></sub></b>                 | 273; 502                    | 66799; 208635                                         | 513                        | 42.5 %<br>(280 nm) | 3.61 (280 nm)<br>3.70 (470 nm)                  | 4.7*10 <sup>-5</sup><br>(508 nm)                                      |
| <b>C<sub>NI<sub>2</sub>BY<sub>2</sub></sub></b>   | 276; 357; 502               | 49435; 51053;<br>148036                               | 513                        | 57.5 %<br>(280 nm) | 3.73 (280 nm)<br>3.70 (365 nm)<br>3.76 (470 nm) | 5.7*10 <sup>-5</sup><br>(508 nm)                                      |

## Optical analysis

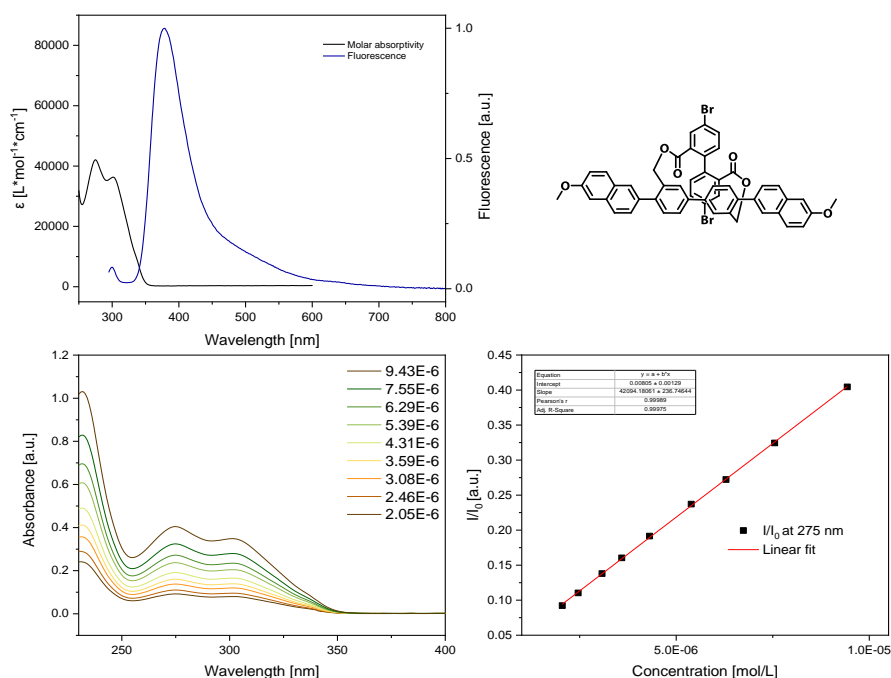

**Figure S5:** Top) Absorptivity ( $c \sim 5 \cdot 10^{-6}$ ) and normalized fluorescence ( $c \sim 1 \cdot 10^{-6}$ , 300 nm) plot in CH<sub>2</sub>Cl<sub>2</sub> of **C<sub>Br<sub>2</sub>Naph<sub>2</sub></sub>**. Bottom) Dilution series of the absorption and linear regression of the absorption value of **C<sub>Br<sub>2</sub>Naph<sub>2</sub></sub>** at 275 nm in CH<sub>2</sub>Cl<sub>2</sub> versus concentration.

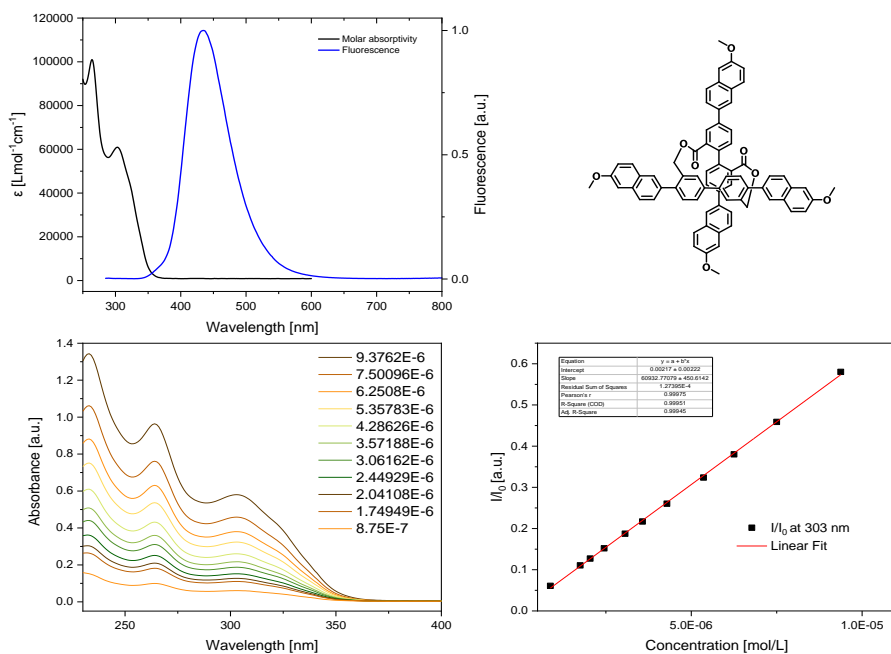

**Figure S6:** Top) Absorptivity ( $c \sim 5 \cdot 10^{-6}$ ) and normalized fluorescence ( $c \sim 1 \cdot 10^{-6}$ , 303 nm) plot in  $CH_2Cl_2$  of  $C_{Naph_4}$ . Bottom) Dilution series of the absorption and linear regression of the absorption value of  $C_{Naph_4}$  at 303 nm in  $CH_2Cl_2$  versus concentration.

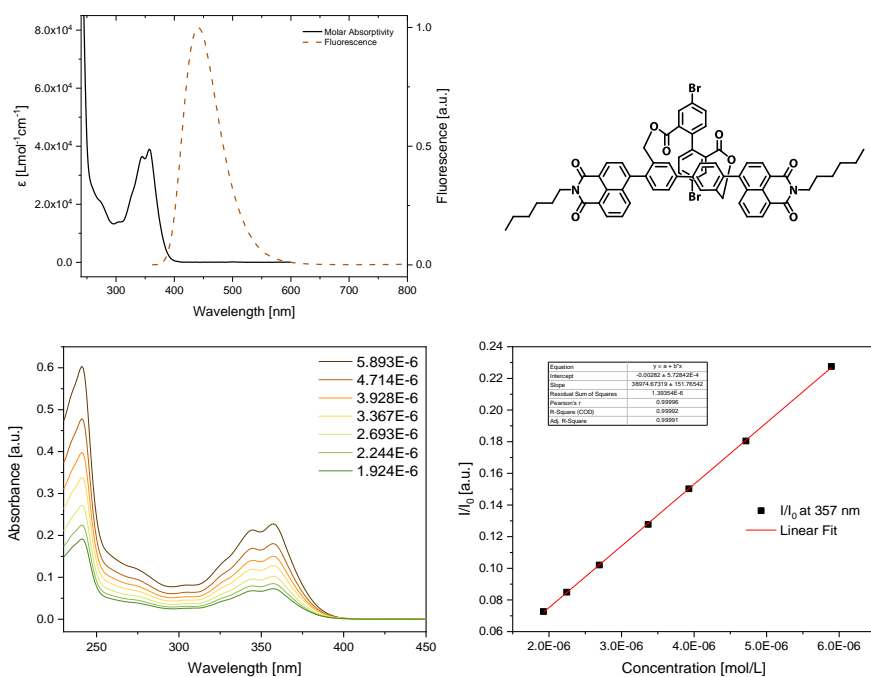

**Figure S7:** Top) Absorptivity ( $c \sim 5 \cdot 10^{-6}$ ) and normalized fluorescence ( $c \sim 1 \cdot 10^{-6}$ , 358 nm) plot in  $CH_2Cl_2$  of  $C_{Br_2Nl_2}$ . Bottom) Dilution series of the absorption and linear regression of the absorption value of  $C_{Br_2Nl_2}$  at 357 nm in  $CH_2Cl_2$  versus concentration.

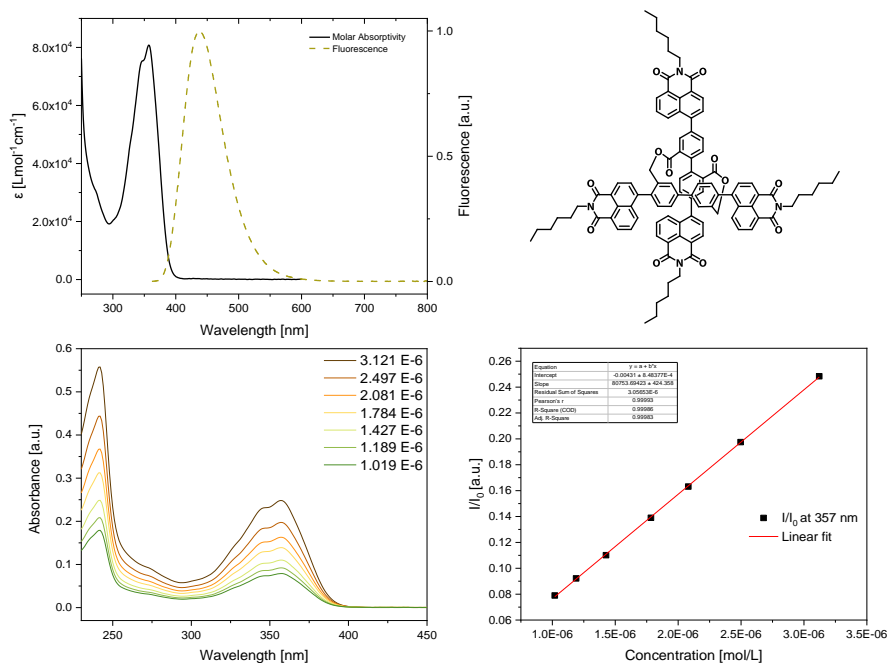

**Figure S8:** Absorptivity ( $c \sim 5 \times 10^{-6}$ ) and normalized fluorescence ( $c \sim 1 \times 10^{-6}$ , 357 nm) plot in  $CH_2Cl_2$  of  $C_{NI_4}$ . Bottom) Dilution series of the absorption and linear regression of the absorption value of  $C_{NI_4}$  at 357 nm in  $CH_2Cl_2$  versus concentration.

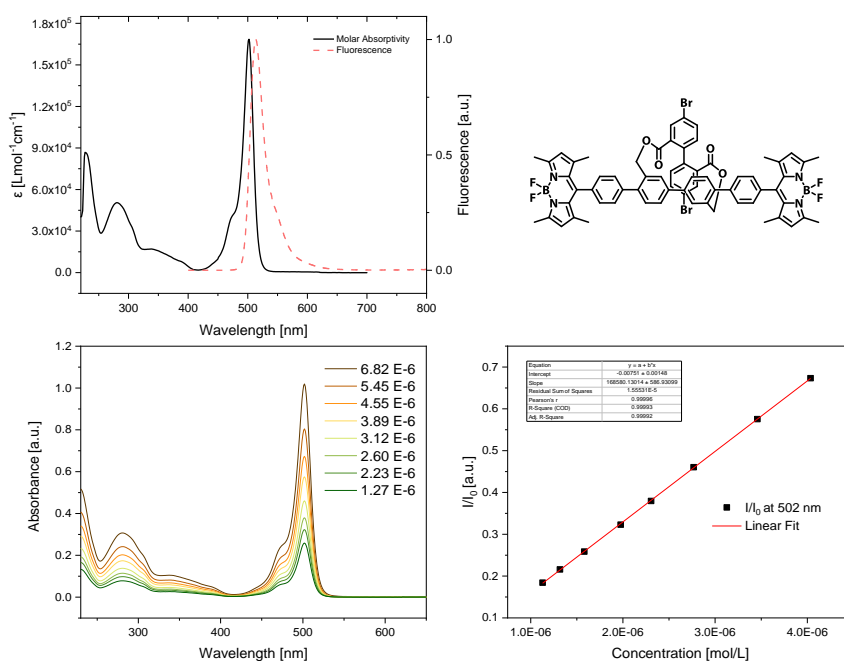

**Figure S9:** Top) Absorptivity ( $c \sim 5 \times 10^{-6}$ ) and normalized fluorescence ( $c \sim 0.5 \times 10^{-6}$ , 280 nm) plot in  $CH_2Cl_2$  of  $C_{Br_2BY_2}$ . Bottom) Dilution series of the absorption and linear regression of the absorption value of  $C_{Br_2BY_2}$  at 502 nm in  $CH_2Cl_2$  versus concentration.



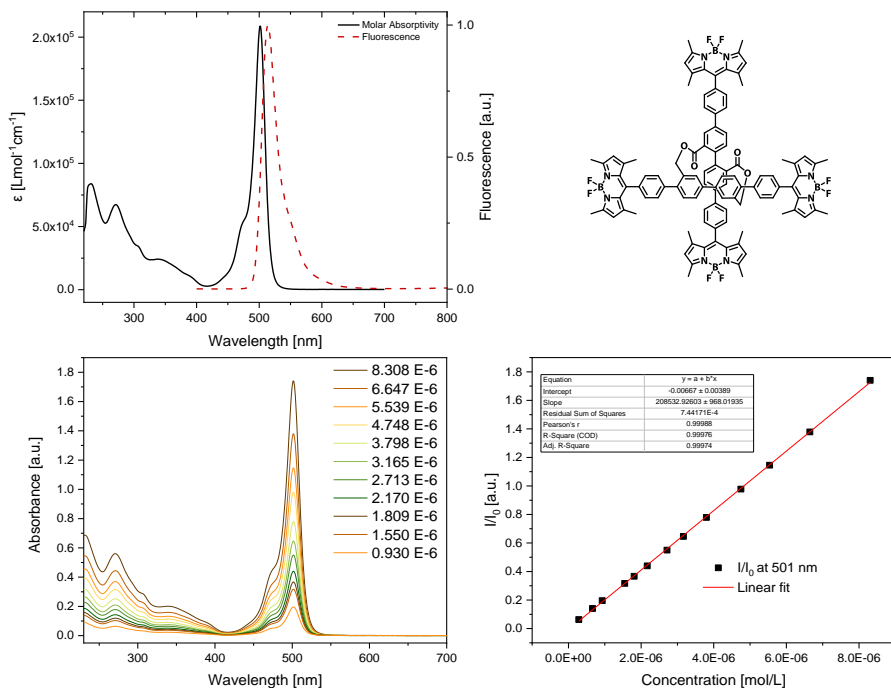

**Figure S10:** Top) Absorptivity ( $c \sim 3 \cdot 10^{-6}$ ) and normalized fluorescence ( $c \sim 0.5 \cdot 10^{-6}$ , 280 nm) plot in  $\text{CH}_2\text{Cl}_2$  of  $\text{C}_{\text{BY}_4}$ . Bottom) Dilution series of the absorption and linear regression of the absorption value of  $\text{C}_{\text{BY}_4}$  at 501 nm in  $\text{CH}_2\text{Cl}_2$  versus concentration.

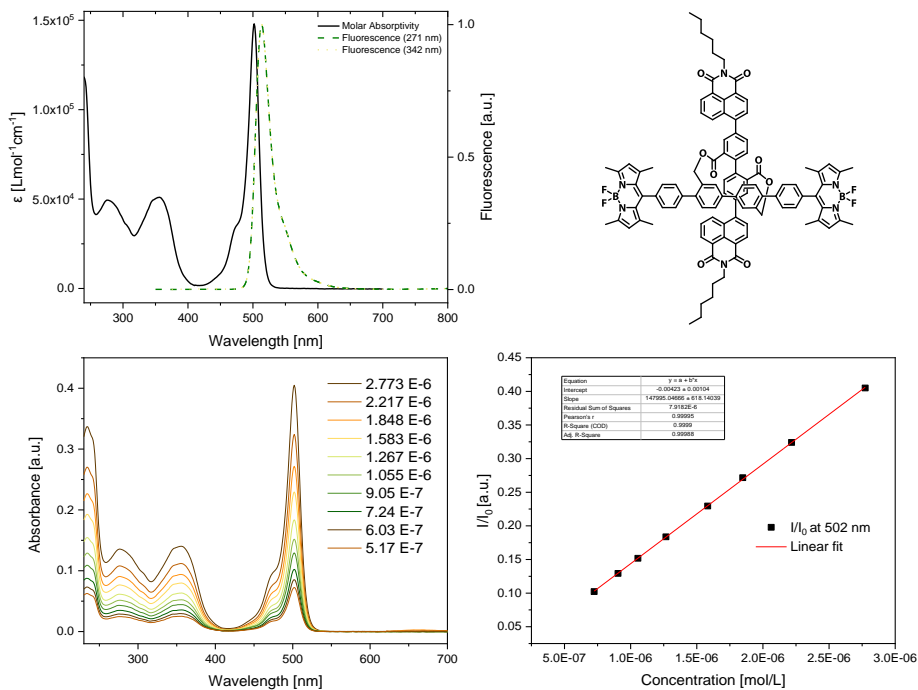

**Figure S11:** Top) Absorptivity ( $c \sim 5 \cdot 10^{-6}$ ) and normalized fluorescence ( $c \sim 0.5 \cdot 10^{-6}$ , 280 nm and 342 nm) plot in  $\text{CH}_2\text{Cl}_2$  of  $\text{C}_{\text{NI}_2\text{BY}_2}$ . Bottom) Dilution series of the absorption and linear regression of the absorption value of  $\text{C}_{\text{NI}_2\text{BY}_2}$  at 502 nm in  $\text{CH}_2\text{Cl}_2$  versus concentration.

## Chiral-analysis Naph-series

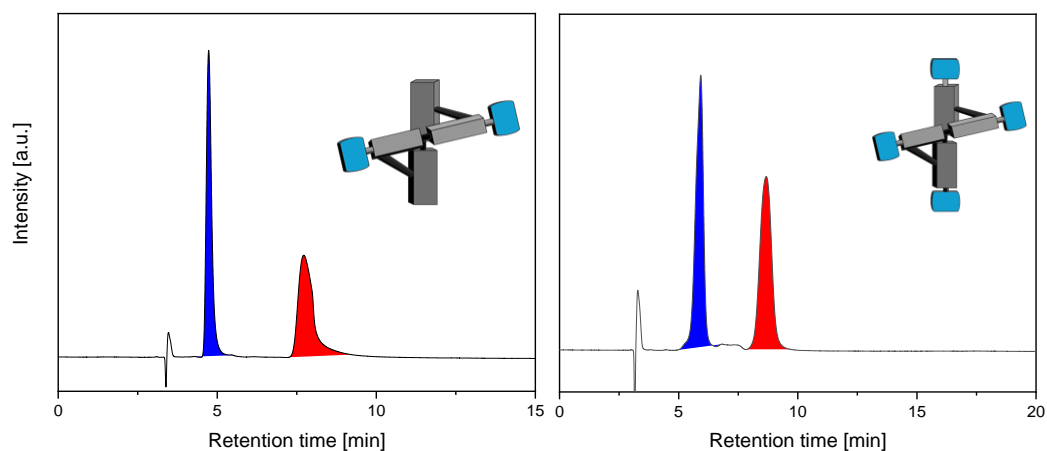

**Figure S12:** HPLC chromatogram of (left)  $\text{rac-CBr}_2\text{Naph}_2$ , IC-column  $\text{CH}_2\text{Cl}_2/\text{heptane}/\text{EtOH}$  (49/49/2) and (right)  $\text{rac-CNaph}_4$ , IA-column  $\text{CH}_2\text{Cl}_2/\text{heptane}$  (4/6). First eluting (E1) and second eluting (E2) enantiomer are depicted in blue and red respectively.

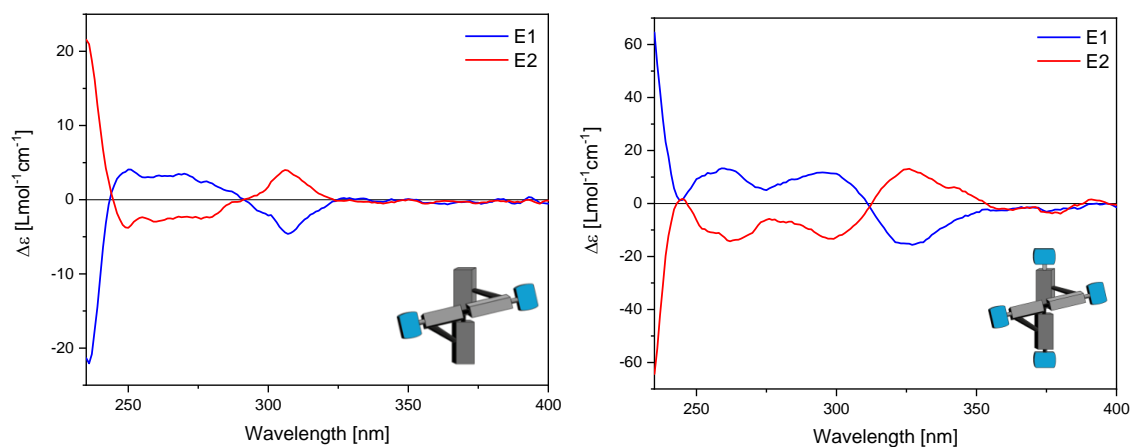

**Figure S13:** CD-spectra of the first eluting E1 (blue) and second eluting E2 (red) enantiomer of (left)  $\text{CBr}_2\text{Naph}_2$  and (right)  $\text{CNaph}_4$  in  $\text{CH}_2\text{Cl}_2$ .

## Assignment of CD-spectra

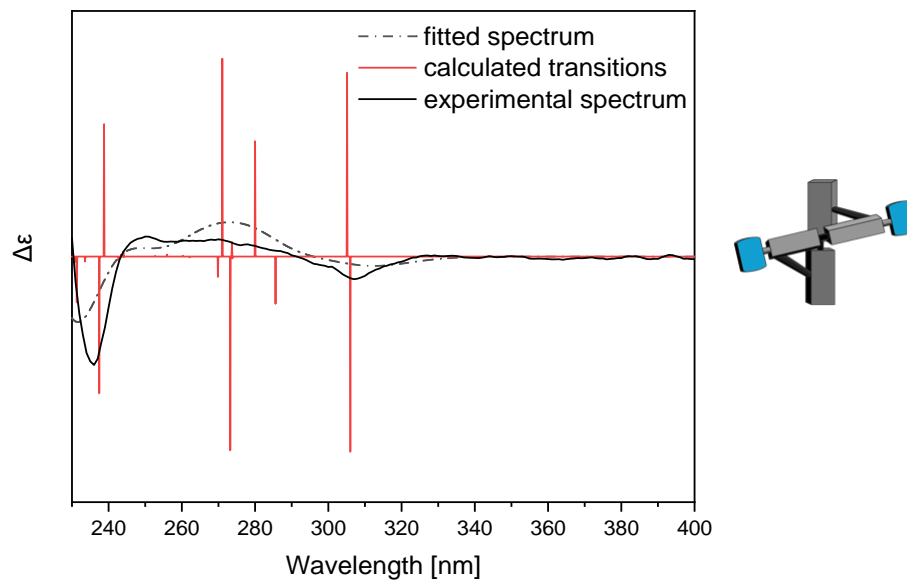

**Figure S14:** Calculated (dash-dot line, fitted with  $\sigma = 0.2$  eV, shifted by 0.2 eV) and experimental (black solid line) spectrum of E1/(P)-CBr<sub>2</sub>Naph<sub>2</sub>. The computed transitions are indicated as bars (red).

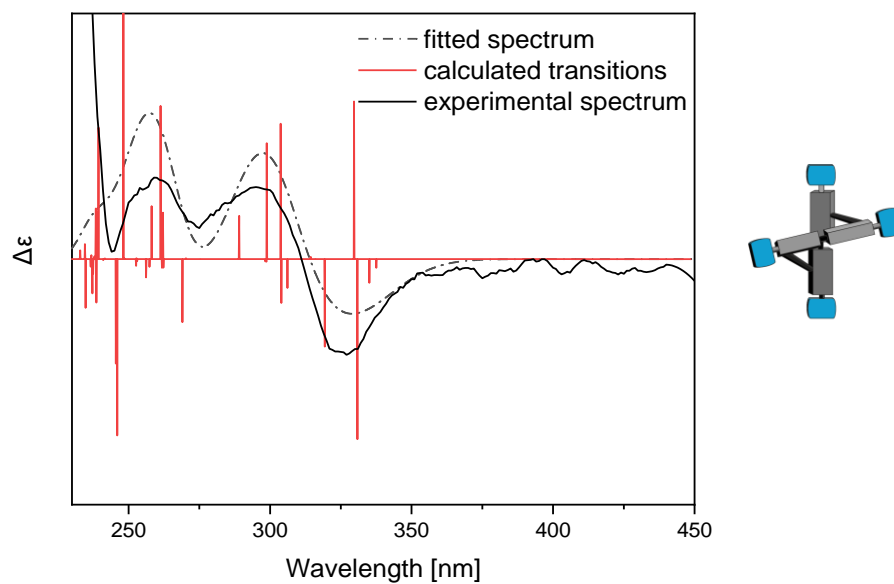

**Figure S15:** Calculated (dash-dot line, fitted with  $\sigma = 0.2$  eV, shifted by 0.5 eV) and experimental (black solid line) spectrum of E1/(P)-CNaph<sub>4</sub>. The computed transitions are indicated as bars (red).

## NI-series

### <sup>1</sup>H-NMR full assignment of **C**<sub>Br<sub>2</sub>NI<sub>2</sub></sub>

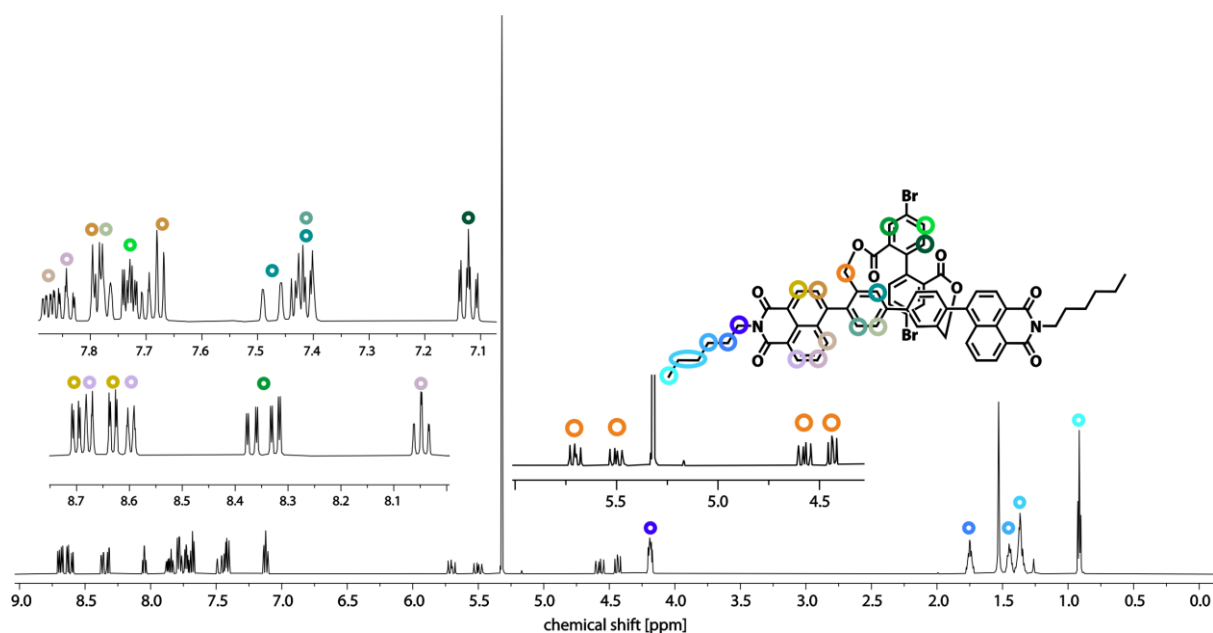

**Figure S16:** Full assignment of <sup>1</sup>H-NMR of **C**<sub>Br<sub>2</sub>NI<sub>2</sub></sub> in CD<sub>2</sub>Cl<sub>2</sub> at 20 °C, 600 MHz. Zoom in on the diastereotopic CH<sub>2</sub> ester protons reveals a set of 8 doublets. While in the aromatic region several signals of the **NI** split in two distinct regions.

### Conformer analysis of **C**<sub>Br<sub>2</sub>NI<sub>2</sub></sub>

CREST was used to preliminary identify possible conformers of **C**<sub>Br<sub>2</sub>NI<sub>2</sub></sub>. Three isomers were identified as (*S*<sub>ar</sub>, *P*, *S*<sub>a</sub>)-, (*S*<sub>ar</sub>, *P*, *R*<sub>a</sub>)-, and (*R*<sub>ar</sub>, *P*, *R*<sub>a</sub>)-**C**<sub>Br<sub>2</sub>NI<sub>2</sub></sub> further optimized by DFT calculations. We calculated the Boltzmann distribution where (*S*<sub>ar</sub>, *P*, *S*<sub>a</sub>)-**C**<sub>Br<sub>2</sub>NI<sub>2</sub></sub> is significantly more stable than (*R*<sub>ar</sub>, *P*, *R*<sub>a</sub>)-**C**<sub>Br<sub>2</sub>NI<sub>2</sub></sub>. The geometries of **C**<sub>Br<sub>2</sub>NI<sub>2</sub></sub> were used to model the initial guesses of **C**<sub>NI<sub>4</sub></sub> and optimized the corresponding (*S*<sub>ar</sub>, *P*, *S*<sub>a</sub>)-, (*S*<sub>ar</sub>, *P*, *R*<sub>a</sub>)-, and (*R*<sub>ar</sub>, *P*, *R*<sub>a</sub>) configurations and calculated their Boltzmann distribution. Interestingly, the (*R*<sub>ar</sub>, *P*, *R*<sub>a</sub>)- **C**<sub>NI<sub>4</sub></sub> is dramatically less stable than the other configurations. All conformers are displayed in the 'Geometry optimized structures' section.

**Table S2:** Boltzmann distribution of (*P*)-**C**<sub>Br<sub>2</sub>NI<sub>2</sub></sub>

| Conformer                                                     | SP E [Hartree] | ZPC [Hartree] | corr [Hartree] | E        | Thermal corrections [Hartree] | G [Hartree] | $p_i = e^{\frac{G_i - G_1}{kT}}$ | $\frac{p_i}{p_{tot}}$ | $\frac{p_i}{p_{tot}} * 100$ |
|---------------------------------------------------------------|----------------|---------------|----------------|----------|-------------------------------|-------------|----------------------------------|-----------------------|-----------------------------|
| ( <i>R</i> <sub>ar</sub> , <i>P</i> , <i>R</i> <sub>a</sub> ) | -7932.0942     | 0.731457      | -7931.362743   | 0.78471  | -7931.30949                   | 0.319267592 | 0.171357475                      | 17.13575              |                             |
| ( <i>S</i> <sub>ar</sub> , <i>P</i> , <i>R</i> <sub>a</sub> ) | -7932.0948     | 0.731665      | -7931.363135   | 0.784807 | -7931.309993                  | 0.543899403 | 0.291921982                      | 29.1922               |                             |
| ( <i>S</i> <sub>ar</sub> , <i>P</i> , <i>S</i> <sub>a</sub> ) | -7932.0954     | 0.731721      | -7931.363679   | 0.784832 | -7931.310568                  | 1           | 0.536720542                      | 53.67205              |                             |

**Table S3:** Boltzmann distribution of (*P*)-**C**<sub>NI<sub>4</sub></sub>

| Conformer                                                     | SP E [Hartree] | ZPC [Hartree] | corr [Hartree] | E        | Thermal corrections [Hartree] | G [Hartree] | $p_i = e^{\frac{G_i - G_1}{kT}}$ | $\frac{p_i}{p_{tot}}$ | $\frac{p_i}{p_{tot}} * 100$ |
|---------------------------------------------------------------|----------------|---------------|----------------|----------|-------------------------------|-------------|----------------------------------|-----------------------|-----------------------------|
| ( <i>R</i> <sub>ar</sub> , <i>P</i> , <i>R</i> <sub>a</sub> ) | -4199.4675     | 0.603688      | -4198.863812   | 0.648764 | -4198.818736                  | 2.49008E-06 | 1.54992E-06                      | 0.000155              |                             |
| ( <i>S</i> <sub>ar</sub> , <i>P</i> , <i>R</i> <sub>a</sub> ) | -4199.4674     | 0.592         | -4198.8754     | 0.636953 | -4198.830447                  | 0.606590009 | 0.377563078                      | 37.75631              |                             |
| ( <i>S</i> <sub>ar</sub> , <i>P</i> , <i>S</i> <sub>a</sub> ) | -4199.4679     | 0.592037      | -4198.875863   | 0.636981 | -4198.830919                  | 1           | 0.622435372                      | 62.24354              |                             |

### VT-NMR of $C_{Br_2Ni_2}$

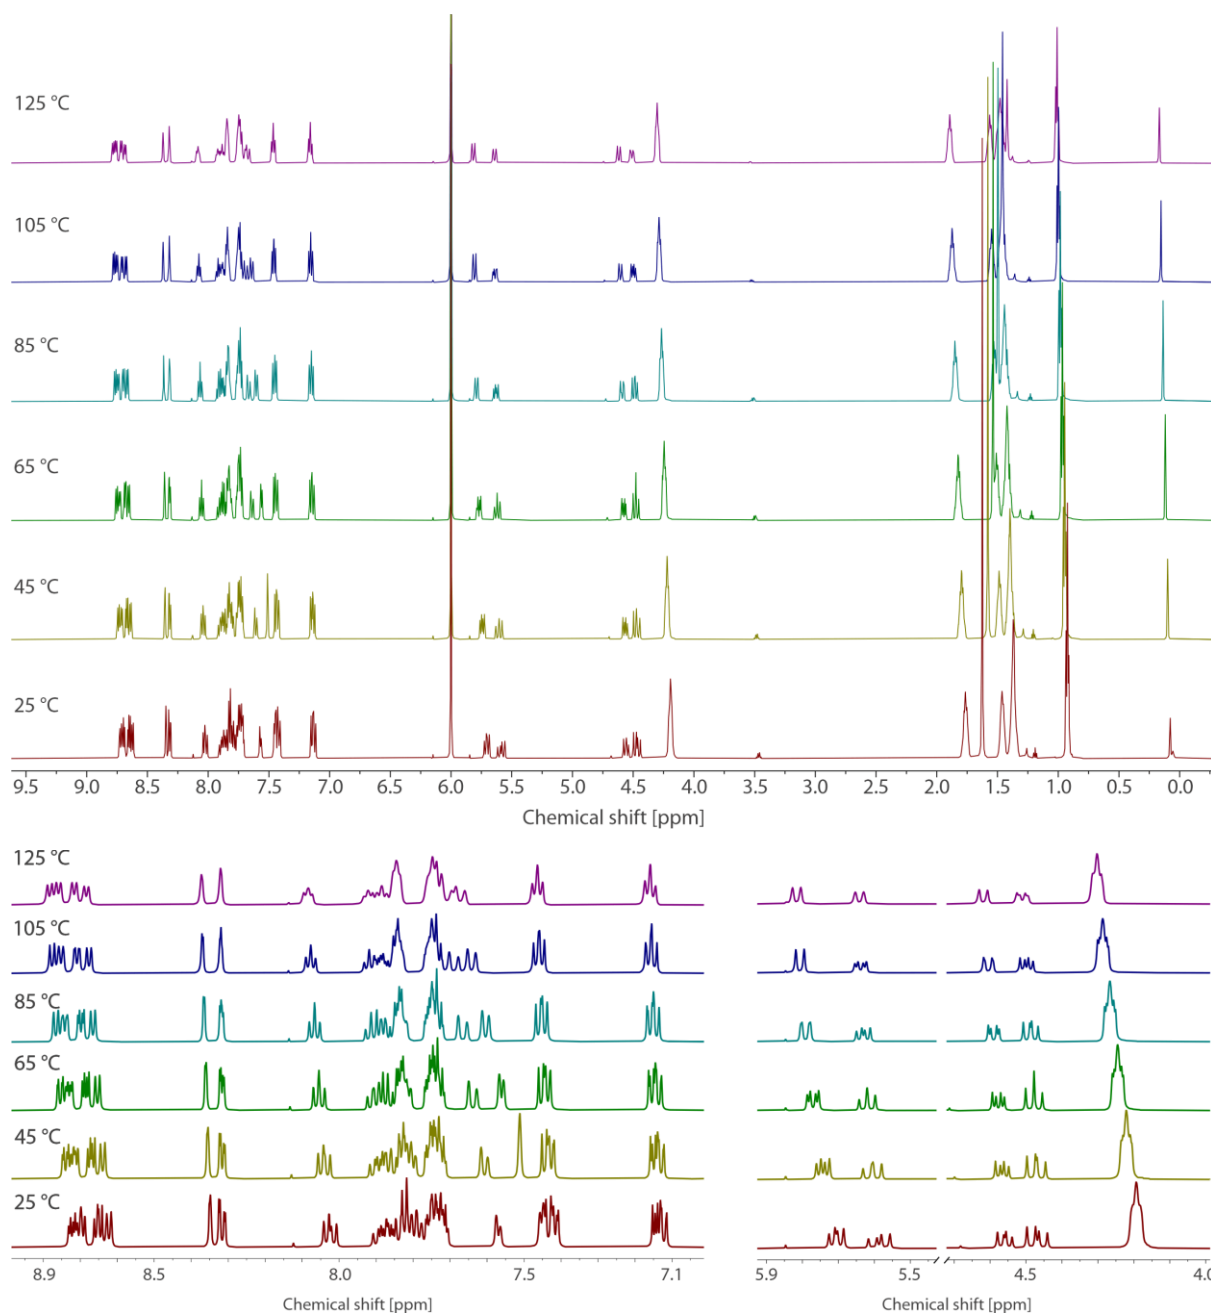

**Figure S17:** Stacked  $^1H$ -NMR of  $C_{Br_2Ni_2}$  in  $TCED_2$  (600 MHz) at variable temperatures between 25 °C and 125 °C. Bottom is the zoom in on the aromatic (left) and ester (right) region respectively.

## Chiral-separation

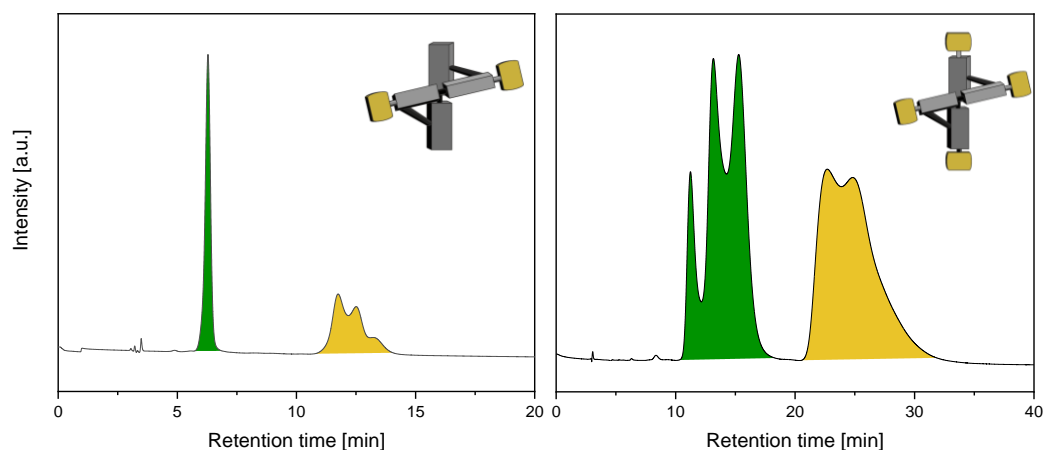

**Figure S18:** HPLC chromatogram of (left)  $\text{rac-CBr}_2\text{Ni}_2$  IA-column heptane/EtOAc (50/50) and (right)  $\text{rac-CNi}_4$  IG-column  $\text{CH}_2\text{Cl}_2/\text{heptane}/\text{EtOH}$  (49/49/2). First eluting (E1) and second eluting (E2) enantiomer set are depicted in green and yellow respectively.

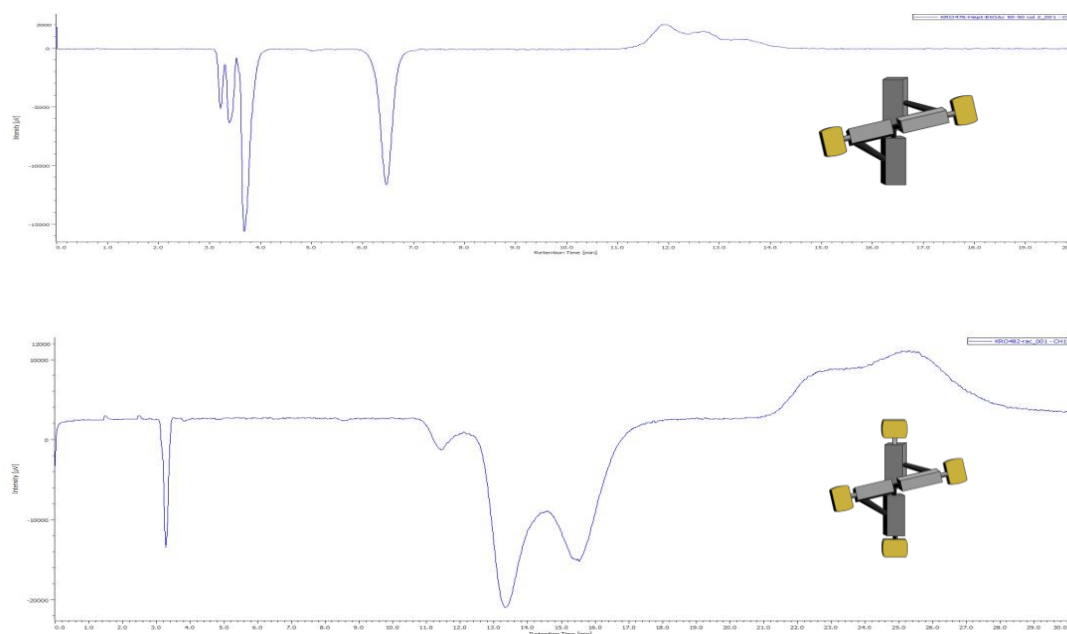

**Figure S19:** Screen shot of in-line CD-detection chromatogram corresponding to HPLC traces shown in Figure SX of (top)  $\text{rac-CBr}_2\text{Ni}_2$  300 nm and (bottom)  $\text{rac-CNi}_4$  250 nm. Excluding the injection peak signal (3-4 minutes) in both cases the first set of conformers show a negative polarity at the corresponding wavelength while the second eluting set of conformers show a positive polarity.

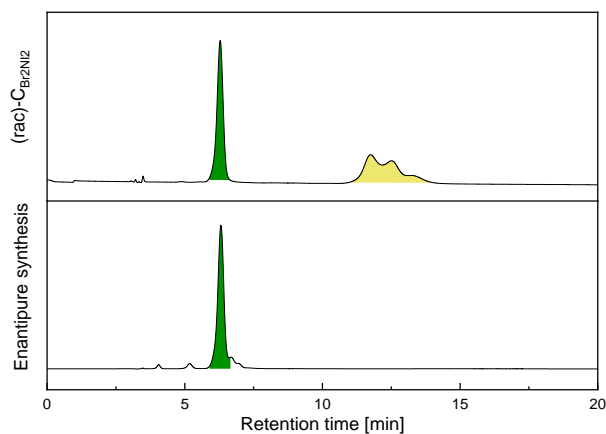

**Figure S20:** HPLC chromatogram of (top) rac- $\mathbf{C}_{Br_2Ni_2}$  and (bottom) enantiopure synthesis product (*P*)- $\mathbf{C}_{Br_2Ni_2}$ , IA-column heptane/EtOAc (50/50).

### CD-spectra

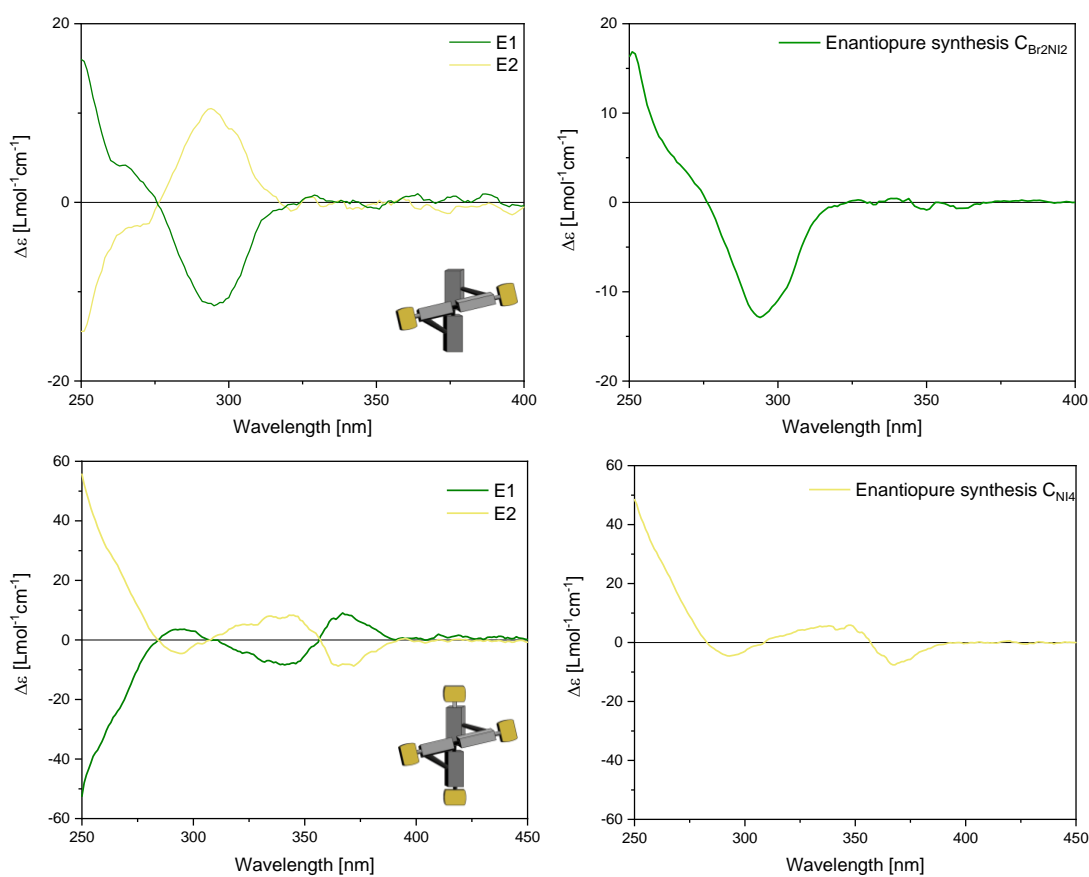

**Figure S21:** CD-spectra in  $\text{CH}_2\text{Cl}_2$  of left) the first eluting E1 (green) and second eluting E2 (yellow) enantiomer of  $\mathbf{C}_{Br_2Ni_2}$  (top) and  $\mathbf{C}_{Ni_4}$  (bottom) and right) the corresponding enantiopure synthesis product of (*P*)- $\mathbf{C}_{Br_2Ni_2}$  and (*P*)- $\mathbf{C}_{Ni_4}$  respectively.

## Assignment of CD-spectra

For (*P*)-**C**<sub>Br<sub>2</sub>Ni<sub>2</sub></sub> and (*P*)-**C**<sub>Ni<sub>4</sub></sub> we assumed Boltzmann distribution as presented above, neglecting kinetic contributions to the distribution during the Suzuki coupling.

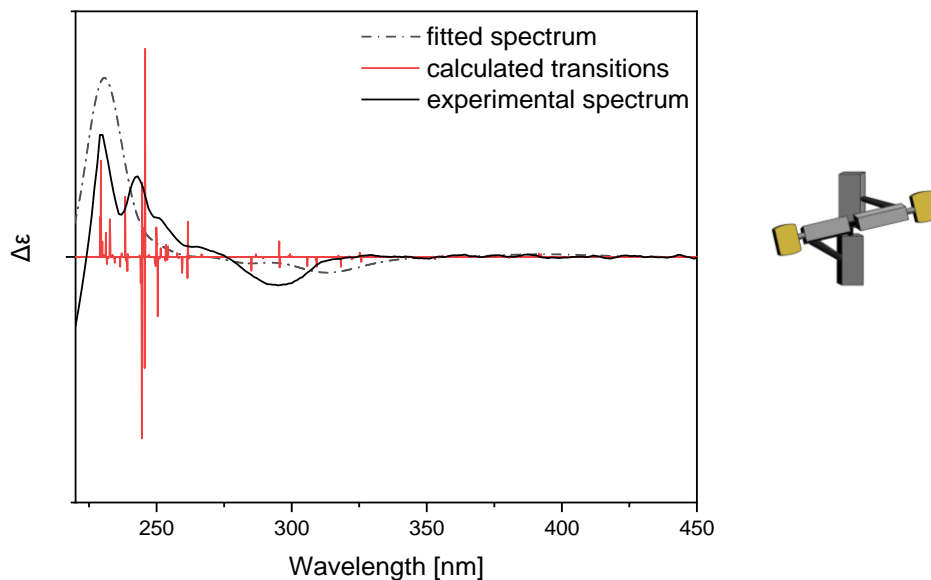

**Figure S22:** Calculated (dash-dot line, fitted with  $\sigma = 0.2$  eV, shifted by 0.8 eV) and experimental (black solid line) spectrum of E1/(*P*)-**C**<sub>Br<sub>2</sub>Ni<sub>2</sub></sub>. The computed transitions are indicated as bars (red).

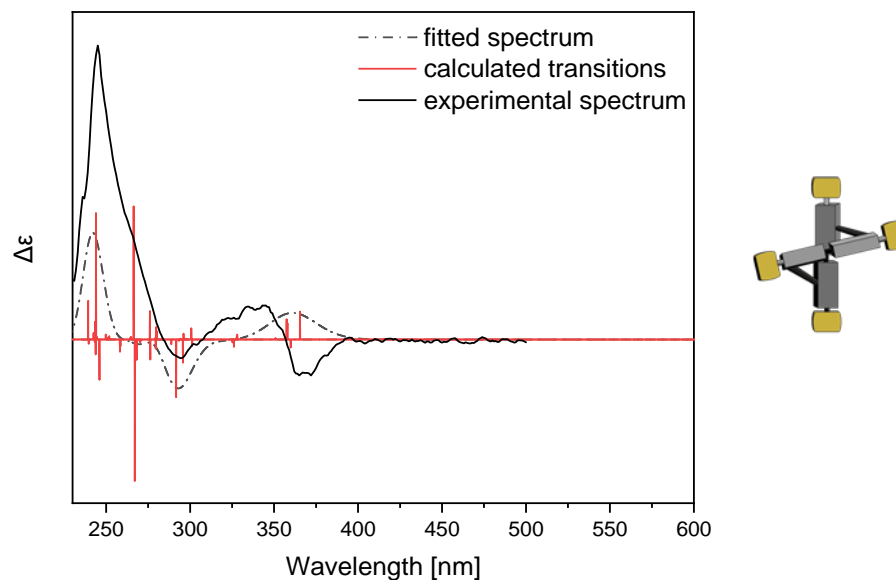

**Figure S23:** Calculated (dash-dot line, fitted with  $\sigma = 0.2$  eV, shifted by 0.5 eV) and experimental (black solid line) spectrum of E2/(*P*)-**C**<sub>Ni<sub>4</sub></sub>. The computed transitions are indicated as bars (red).



## BY-series

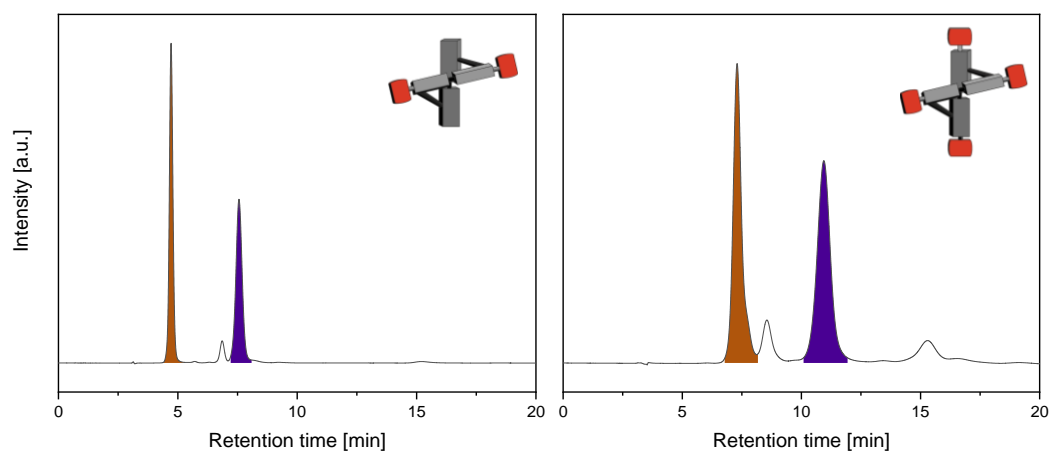

**Figure S24:** HPLC chromatogram of (left) rac- $\text{C}_{\text{Br}_2\text{BY}_2}$ , IA-column  $\text{CH}_2\text{Cl}_2/\text{heptane}$  (40/60) and (right) rac- $\text{C}_{\text{BY}_4}$ , IA-column  $\text{heptane}/\text{EtOAc}$  (60/40). First eluting (E1) and second eluting (E2) enantiomer set are depicted in orange and purple respectively.

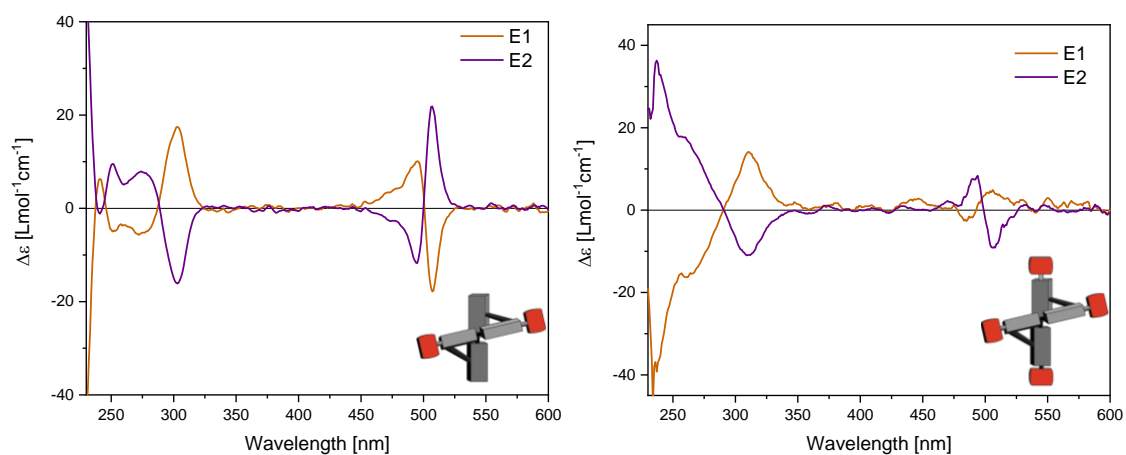

**Figure S25:** CD-spectra of the first eluting E1 (orange) and second eluting E2 (purple) enantiomer of left)  $\text{C}_{\text{Br}_2\text{BY}_2}$  and right)  $\text{C}_{\text{BY}_4}$  in  $\text{CH}_2\text{Cl}_2$ .

## Assignment of CD-spectra

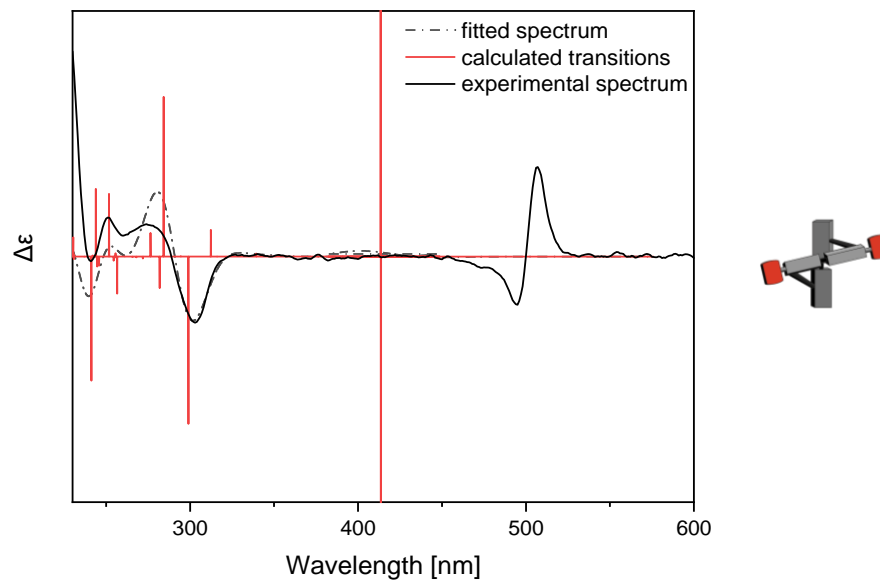

**Figure S26:** Calculated (dash-dot line, fitted with  $\sigma = 0.2$  eV, shifted by 0.5 eV) and experimental (black solid line) spectrum of E2/(P)-C<sub>Br<sub>2</sub>Br<sub>2</sub>. The computed transitions are indicated as bars (red).</sub>

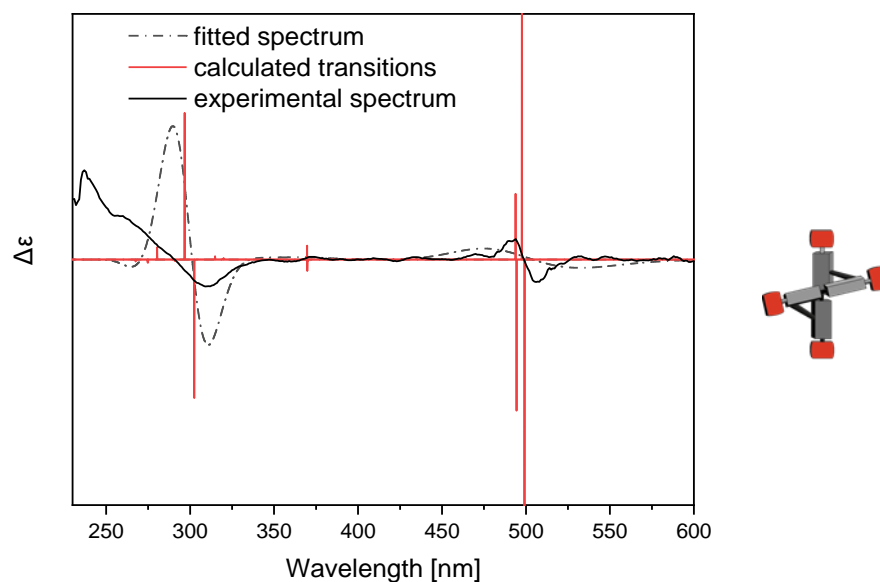

**Figure S27:** Calculated (dash-dot line, fitted with  $\sigma = 0.2$  eV, shifted by 0.5 eV) and experimental (black solid line) spectrum of E2/(P)-C<sub>BY<sub>4</sub></sub>. The computed transitions are indicated as bars (red).

## NI/BY chromophore

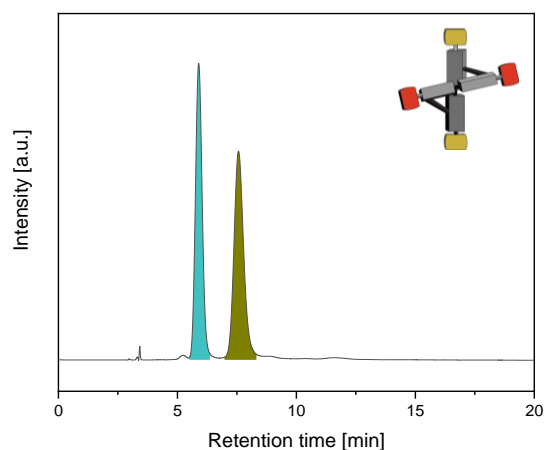

**Figure S28:** HPLC chromatogram of rac- $\text{C}_{\text{Ni}_2\text{BY}_2}$  IBN-5-column heptane/EtOAc (50/50) First eluting (E1) and second eluting (E2) enantiomer set are depicted in cyan and dark-yellow respectively.

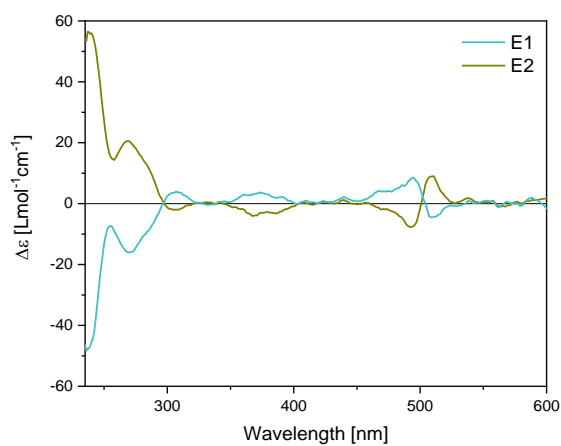

**Figure S29:** CD-spectra of the first eluting E1 (cyan) and second eluting E2 (dark-yellow) enantiomer of left)  $\text{C}_{\text{Ni}_2\text{BY}_2}$  in  $\text{CH}_2\text{Cl}_2$ .

## Assignment of CD-spectra

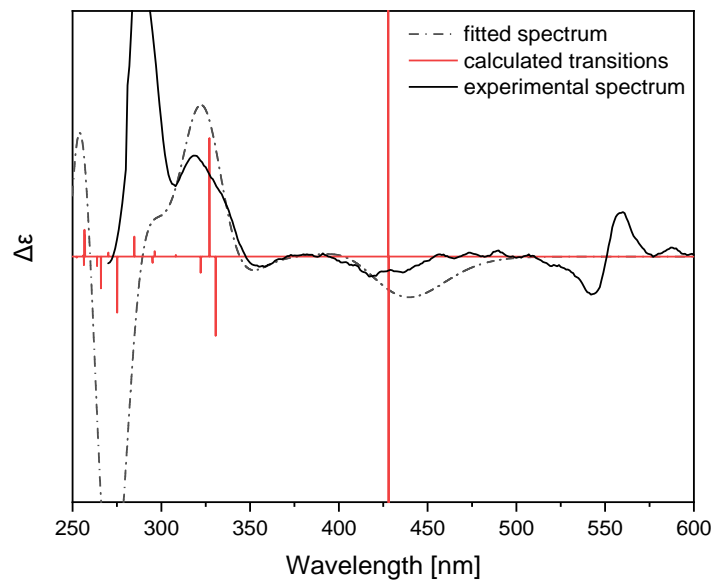

**Figure S30:** Calculated (dash-dot line, fitted with  $\sigma = 0.2$  eV, shifted by 0.1 eV) and experimental (black solid line) spectrum of E2/(*P*)- $C_{Ni_2BY_2}$ . The computed transitions are indicated as bars (red).

## Comparison CD-spectra (*P*)- $C_{Naph_4}$ , (*P*)- $C_{Ni_4}$ and (*P*)- $C_{BY_4}$

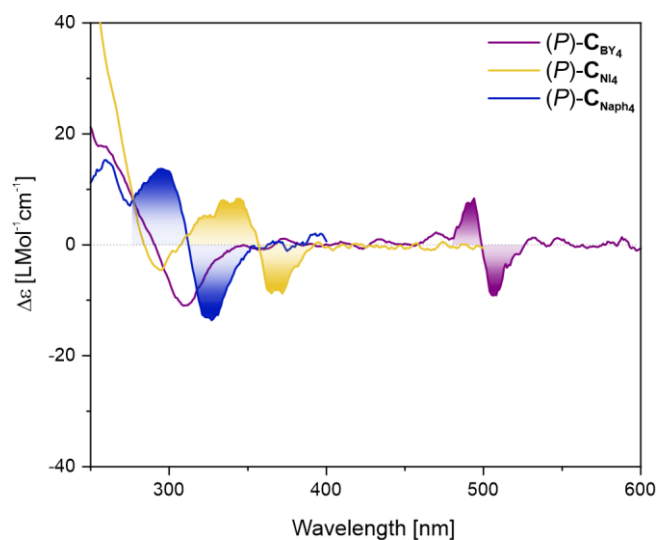

**Figure S31:** ECD-spectra of (*P*)-enantiomer of in blue  $C_{Naph_4}$ , yellow  $C_{Ni_4}$  and in purple  $C_{BY_4}$  bisignate signals are following a negative couplet indicated by integrated signals under the respective plots.

### Geometry analysis $C_{Br_2BY_2}$

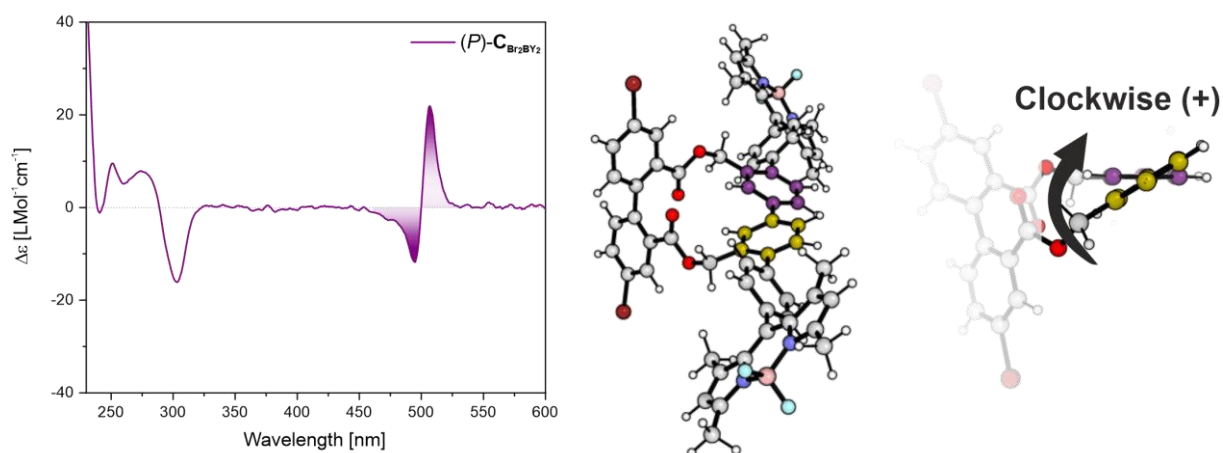

**Figure S32:** ECD-spectrum of  $(P)$ -  $C_{Br_2BY_2}$  and geometry optimized structure (side view). The center 'twist' between the biphenyls colored in yellow and purple follow a R configuration, which results in that on average the **BY** motives will be oriented in R configuration. This results in a clockwise and therefore positive couplet, hence explains the CD signal.

## FRET-System

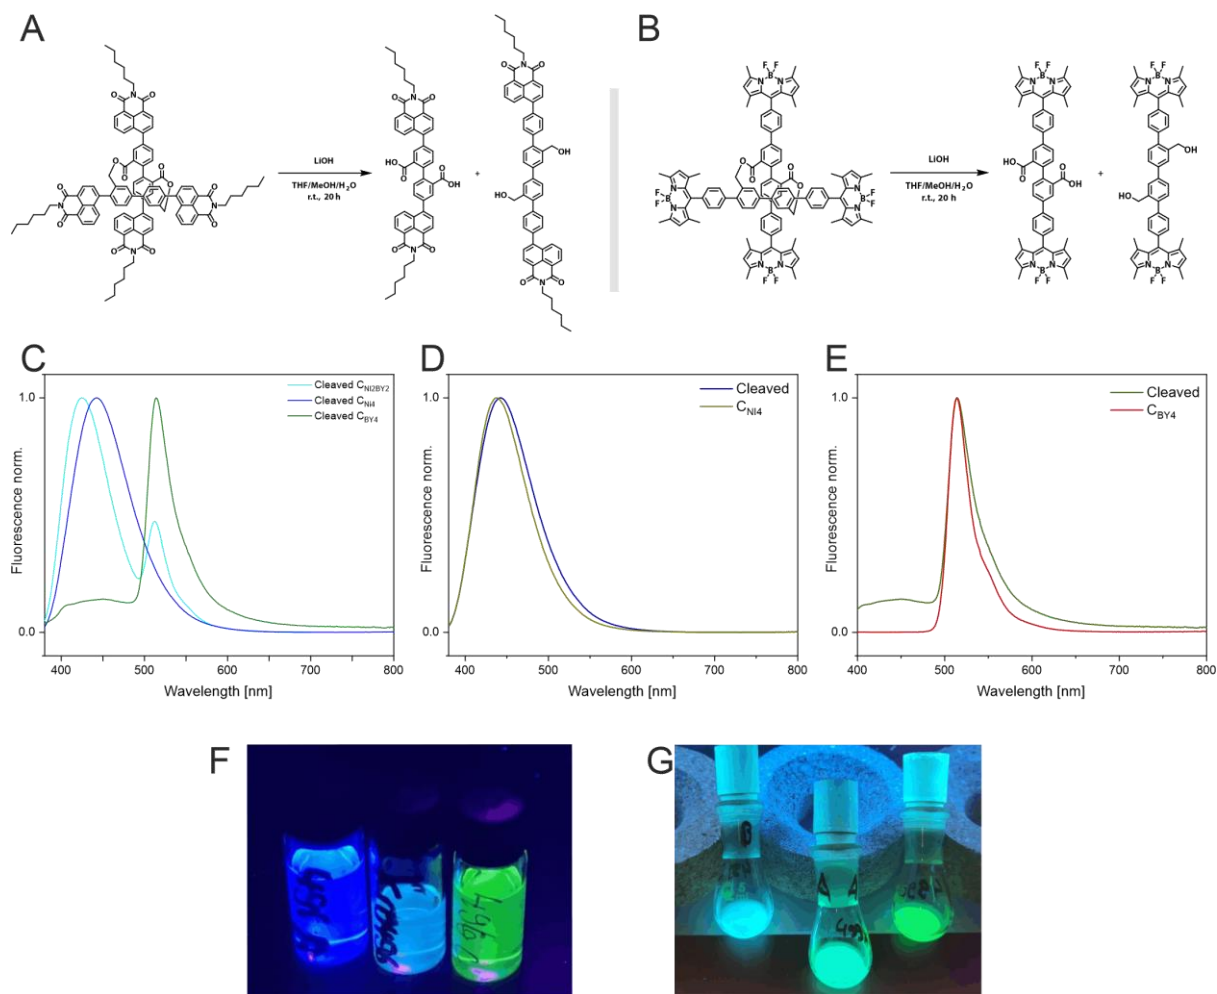

**Figure S33:** Template removal and resulting fluorescence spectra. A,B) Scheme of template removal ( $C_{NI4}$  and  $C_{BY4}$  respectively). Fluorescence spectra of C) comparison of cleaved products of  $C_{NI2BY2}$ ,  $C_{NI4}$  and  $C_{BY4}$  D,E) comparison of  $C_{NI4}$  and  $C_{BY4}$  and their cleaved products respectively, in  $CH_2Cl_2$  at 20 °C with  $\lambda_{em} = 360$  nm. F) Picture of a solution of the cleaved products of  $C_{NI4}$ ,  $C_{NI2BY2}$  and  $C_{BY4}$  (from left to right respectively) in a  $CH_2Cl_2$  upon irradiation with  $\lambda_{em} = 366$ . G) Picture taken of the reaction mixtures from left to right  $C_{NI4}$ ,  $C_{NI2BY2}$  and  $C_{BY4}$  upon irradiation with  $\lambda_{em} = 366$ .

## Crystallographic data

**(rac)-C<sub>Br<sub>2</sub>I<sub>2</sub></sub> (CCDC – 2378892)**

**Table S4.** Crystal data and structure refinement for **(rac)-C<sub>Br<sub>2</sub>I<sub>2</sub></sub>**

|                                             |                                                                                  |
|---------------------------------------------|----------------------------------------------------------------------------------|
| Identification code                         | (rac)-C <sub>Br<sub>2</sub>I<sub>2</sub></sub>                                   |
| Empirical formula                           | C <sub>29.17</sub> H <sub>17</sub> Br <sub>2</sub> I <sub>2</sub> O <sub>4</sub> |
| Formula weight                              | 845.05                                                                           |
| Temperature/K                               | 150                                                                              |
| Crystal system                              | triclinic                                                                        |
| Space group                                 | P-1                                                                              |
| a/Å                                         | 12.6865(2)                                                                       |
| b/Å                                         | 14.4512(2)                                                                       |
| c/Å                                         | 23.5383(4)                                                                       |
| α/°                                         | 78.8510(10)                                                                      |
| β/°                                         | 80.2510(10)                                                                      |
| γ/°                                         | 81.8160(10)                                                                      |
| Volume/Å <sup>3</sup>                       | 4145.92(11)                                                                      |
| Z                                           | 6                                                                                |
| ρ <sub>calc</sub> /cm <sup>3</sup>          | 2.031                                                                            |
| μ/mm <sup>-1</sup>                          | 14.710                                                                           |
| F(000)                                      | 2400.0                                                                           |
| Crystal size/mm <sup>3</sup>                | 0.16 × 0.117 × 0.04                                                              |
| Radiation                                   | GaKα (λ = 1.34143)                                                               |
| 2θ range for data collection/°              | 5.458 to 111.432                                                                 |
| Index ranges                                | -15 ≤ h ≤ 15, -17 ≤ k ≤ 16, -28 ≤ l ≤ 22                                         |
| Reflections collected                       | 68037                                                                            |
| Independent reflections                     | 15876 [R <sub>int</sub> = 0.0204, R <sub>sigma</sub> = 0.0158]                   |
| Data/restraints/parameters                  | 15876/7/1022                                                                     |
| Goodness-of-fit on F <sup>2</sup>           | 1.027                                                                            |
| Final R indexes [I ≥ 2σ (I)]                | R <sub>1</sub> = 0.0333, wR <sub>2</sub> = 0.0917                                |
| Final R indexes [all data]                  | R <sub>1</sub> = 0.0362, wR <sub>2</sub> = 0.0935                                |
| Largest diff. peak/hole / e Å <sup>-3</sup> | 1.61/-2.00                                                                       |

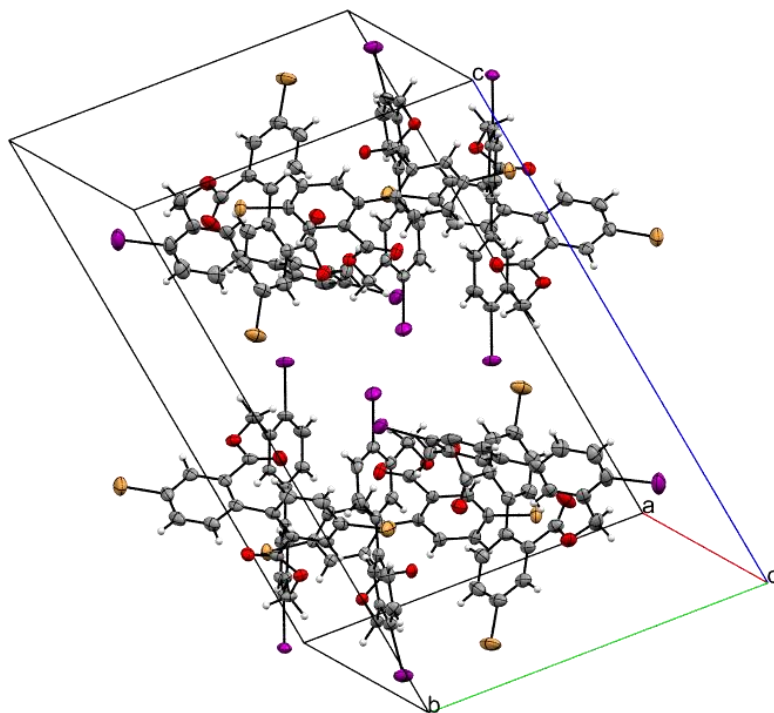

**Figure S34.** Unit-cell of the solid-state structure of (rac)-C<sub>Br<sub>2</sub>I<sub>2</sub></sub>. Visualized as ORTEP representation with 50 % probability.

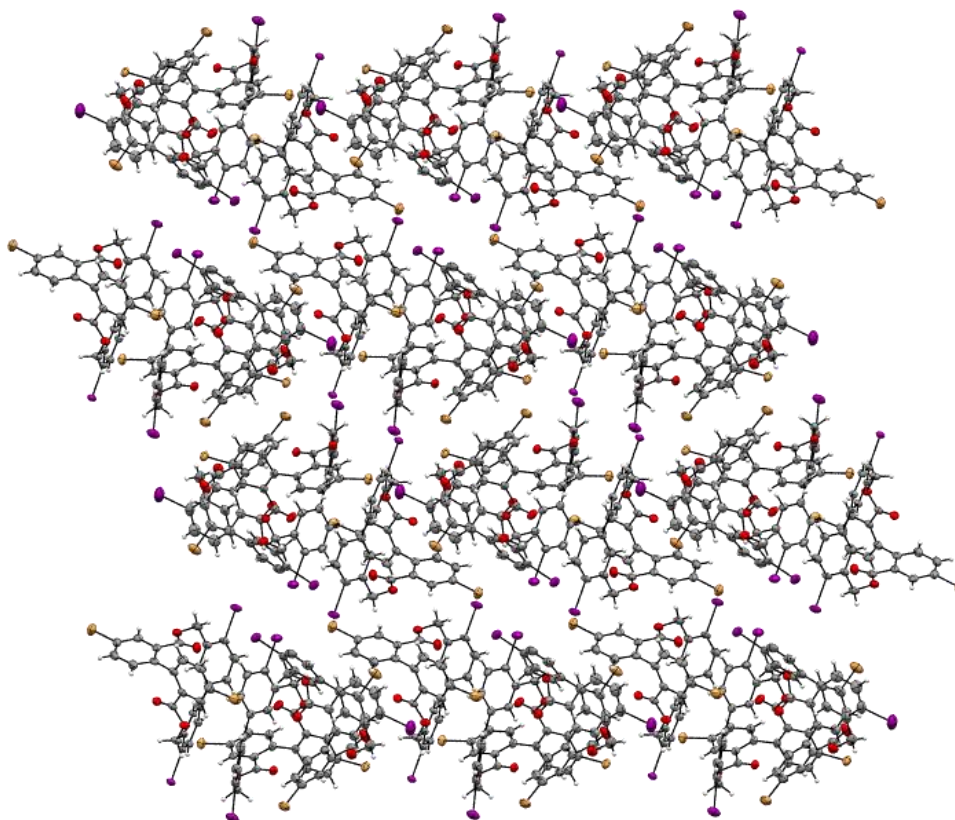

**Figure S35.** Enantiopure layer packing of (rac)-C<sub>Br<sub>2</sub>I<sub>2</sub></sub>, visualized as ORTEP representation with 50 % probability. Top to bottom the horizontal layers contain only P, M, P, M enantiomers respectively.



**(P)-C<sub>Br2I2</sub> (CCDC – 2378893)****Table S5.** Crystal data and structure refinement for **(P)-C<sub>Br2I2</sub>**

|                                             |                                                                                    |
|---------------------------------------------|------------------------------------------------------------------------------------|
| Identification code                         | (P)- C <sub>Br2I2</sub>                                                            |
| Empirical formula                           | C <sub>32.15</sub> H <sub>20.3</sub> Br <sub>2</sub> I <sub>2</sub> O <sub>4</sub> |
| Formula weight                              | 884.14                                                                             |
| Temperature/K                               | 150                                                                                |
| Crystal system                              | monoclinic                                                                         |
| Space group                                 | I2                                                                                 |
| a/Å                                         | 37.2339(2)                                                                         |
| b/Å                                         | 18.2754(2)                                                                         |
| c/Å                                         | 28.1115(2)                                                                         |
| α/°                                         | 90                                                                                 |
| β/°                                         | 90.1840(10)                                                                        |
| γ/°                                         | 90                                                                                 |
| Volume/Å <sup>3</sup>                       | 19128.8(3)                                                                         |
| Z                                           | 24                                                                                 |
| ρ <sub>calc</sub> /cm <sup>3</sup>          | 1.842                                                                              |
| μ/mm <sup>-1</sup>                          | 18.709                                                                             |
| F(000)                                      | 10108.0                                                                            |
| Crystal size/mm <sup>3</sup>                | 0.3 × 0.243 × 0.2                                                                  |
| Radiation                                   | Cu Kα (λ = 1.54186)                                                                |
| 2θ range for data collection/°              | 9.726 to 140.562                                                                   |
| Index ranges                                | -44 ≤ h ≤ 29, -21 ≤ k ≤ 22, -33 ≤ l ≤ 34                                           |
| Reflections collected                       | 227119                                                                             |
| Independent reflections                     | 35522 [R <sub>int</sub> = 0.0348, R <sub>sigma</sub> = 0.0205]                     |
| Data/restraints/parameters                  | 35522/823/2001                                                                     |
| Goodness-of-fit on F <sup>2</sup>           | 1.036                                                                              |
| Final R indexes [I ≥ 2σ (I)]                | R <sub>1</sub> = 0.0845, wR <sub>2</sub> = 0.2270                                  |
| Final R indexes [all data]                  | R <sub>1</sub> = 0.0882, wR <sub>2</sub> = 0.2324                                  |
| Largest diff. peak/hole / e Å <sup>-3</sup> | 6.78/-3.01                                                                         |
| Flack parameter                             | 0.026(6)                                                                           |

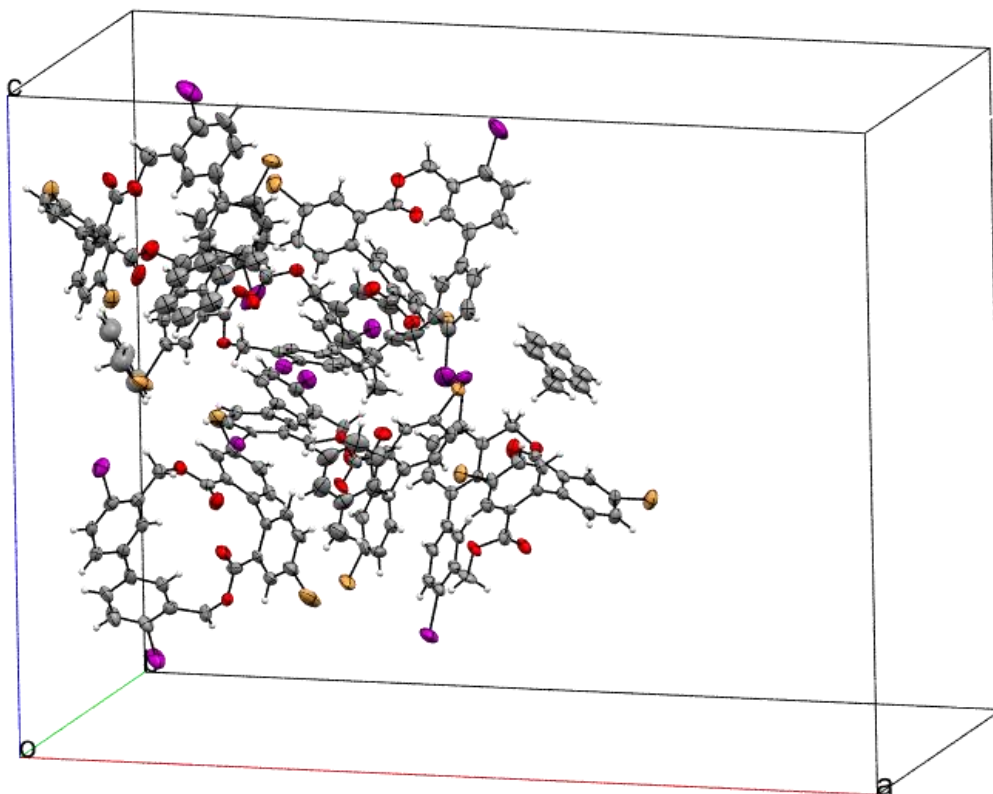

**Figure S36.** Unit-cell of the solid-state structure of (*P*)-C<sub>Br<sub>2</sub>I<sub>2</sub></sub>. Visualized as ORTEP representation with 50 % probability.

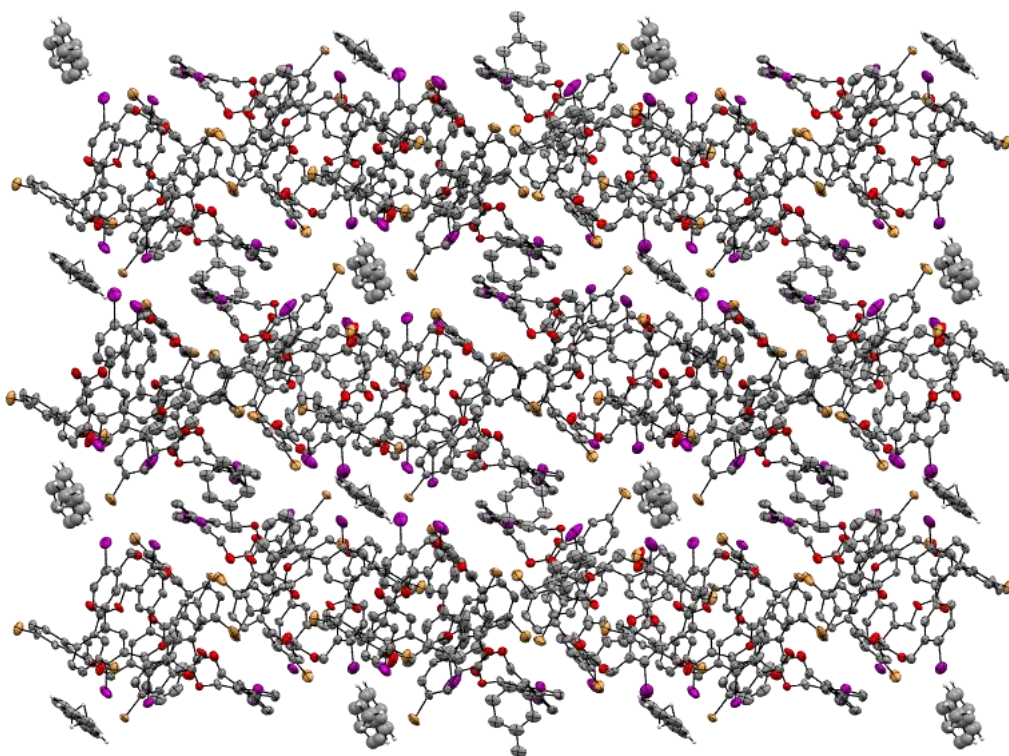

**Figure S37.** Layered packing of (*P*)-C<sub>Br<sub>2</sub>I<sub>2</sub></sub>, visualized as ORTEP representation with 50 % probability. Horizontal layers of (*P*)-C<sub>Br<sub>2</sub>I<sub>2</sub></sub> with toluene molecules positioned in between the layers.

**(rac)-C<sub>Br<sub>2</sub>BY<sub>2</sub></sub> (CCDC – 2378894)****Table S6.** Crystal data and structure refinement for **(rac)-C<sub>Br<sub>2</sub>BY<sub>2</sub></sub>**

|                                             |                                                                                                                 |
|---------------------------------------------|-----------------------------------------------------------------------------------------------------------------|
| Identification code                         | (rac)-C <sub>Br<sub>2</sub>BY<sub>2</sub></sub>                                                                 |
| Empirical formula                           | C <sub>74.4</sub> H <sub>71.2</sub> B <sub>2</sub> Br <sub>2</sub> F <sub>4</sub> N <sub>4</sub> O <sub>4</sub> |
| Formula weight                              | 1342.79                                                                                                         |
| Temperature/K                               | 150                                                                                                             |
| Crystal system                              | monoclinic                                                                                                      |
| Space group                                 | I2/a                                                                                                            |
| a/Å                                         | 13.8303(3)                                                                                                      |
| b/Å                                         | 16.4157(3)                                                                                                      |
| c/Å                                         | 28.8295(6)                                                                                                      |
| α/°                                         | 90                                                                                                              |
| β/°                                         | 103.133(2)                                                                                                      |
| γ/°                                         | 90                                                                                                              |
| Volume/Å <sup>3</sup>                       | 6374.1(2)                                                                                                       |
| Z                                           | 4                                                                                                               |
| ρ <sub>calc</sub> /cm <sup>3</sup>          | 1.399                                                                                                           |
| μ/mm <sup>-1</sup>                          | 2.154                                                                                                           |
| F(000)                                      | 2774.0                                                                                                          |
| Crystal size/mm <sup>3</sup>                | 0.25 × 0.123 × 0.05                                                                                             |
| Radiation                                   | Cu Kα (λ = 1.54186)                                                                                             |
| 2θ range for data collection/°              | 6.238 to 140.046                                                                                                |
| Index ranges                                | -16 ≤ h ≤ 11, -19 ≤ k ≤ 19, -31 ≤ l ≤ 35                                                                        |
| Reflections collected                       | 54522                                                                                                           |
| Independent reflections                     | 5955 [R <sub>int</sub> = 0.0362, R <sub>sigma</sub> = 0.0177]                                                   |
| Data/restraints/parameters                  | 5955/0/374                                                                                                      |
| Goodness-of-fit on F <sup>2</sup>           | 1.034                                                                                                           |
| Final R indexes [I ≥ 2σ (I)]                | R <sub>1</sub> = 0.0428, wR <sub>2</sub> = 0.1089                                                               |
| Final R indexes [all data]                  | R <sub>1</sub> = 0.0584, wR <sub>2</sub> = 0.1190                                                               |
| Largest diff. peak/hole / e Å <sup>-3</sup> | 0.49/-0.58                                                                                                      |

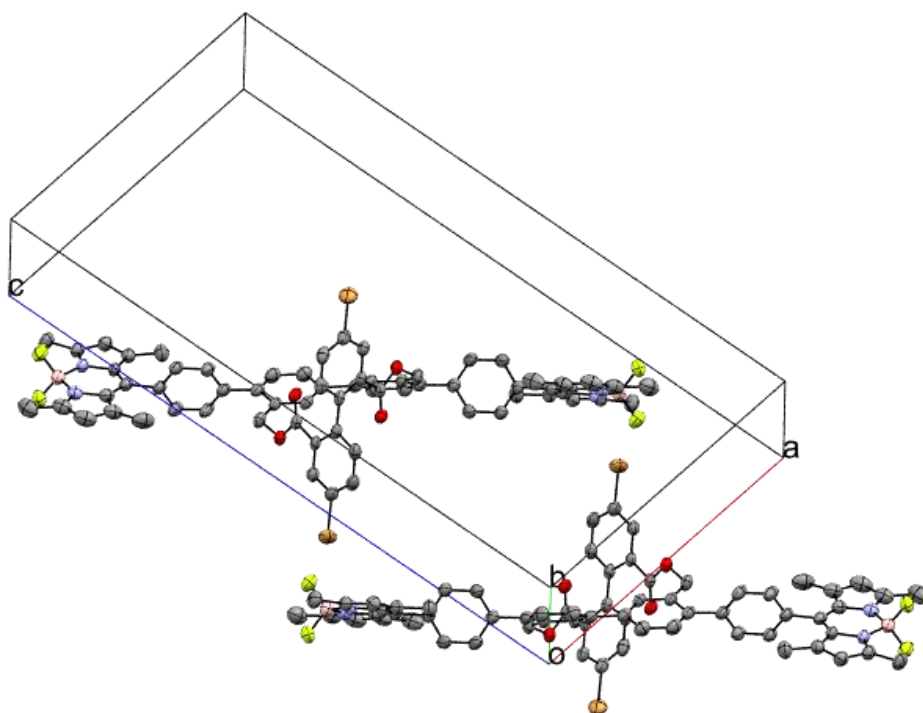

**Figure S38.** Unit-cell of the solid-state structure of (rac)-C<sub>Br<sub>2</sub>BY<sub>2</sub>. Visualized as ORTEP representation with 50 % probability.</sub>

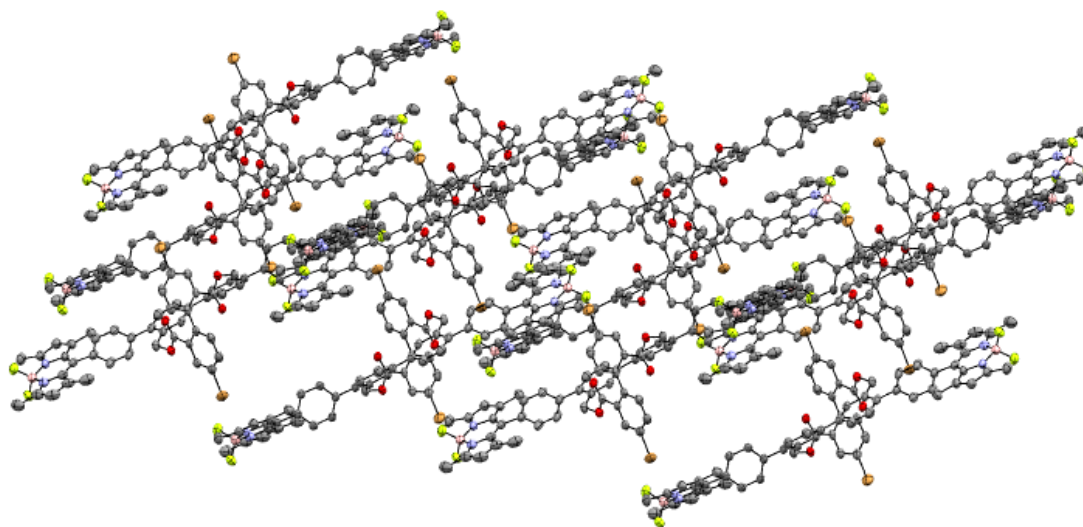

**Figure S39.** Packing of (rac)-C<sub>Br<sub>2</sub>BY<sub>2</sub>, visualized as ORTEP representation with 50 % probability.</sub>

## Geometry optimized structures

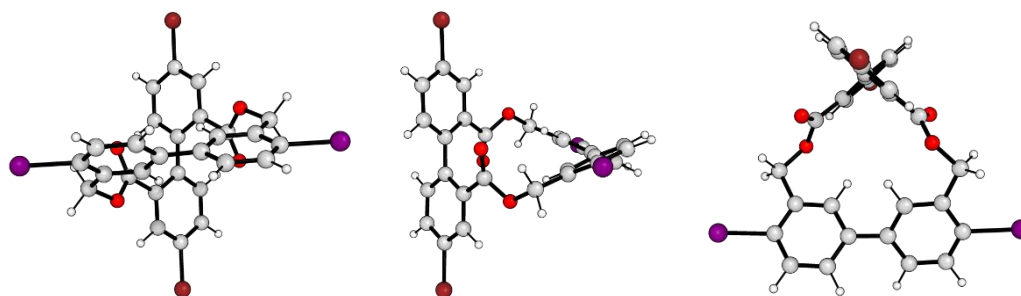

**Figure S40.** Geometry optimized structure of  $(P)\text{-C}_{\text{Br}_2\text{b}_2}$ , displayed in front, side and top view.

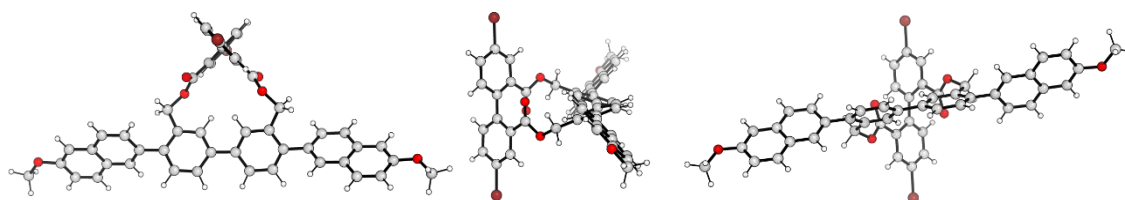

**Figure S41.** Geometry optimized structure of  $(P)\text{-C}_{\text{Br}_2\text{Naph}_2}$ , displayed in front, side and top view.

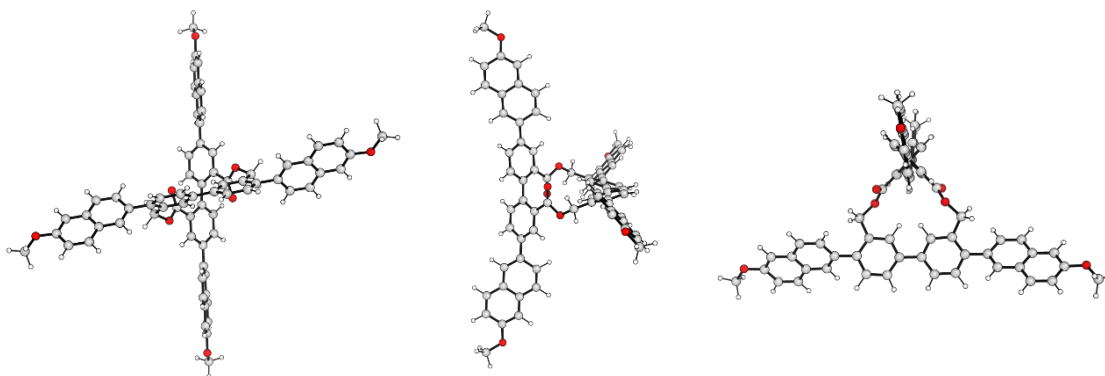

**Figure S42.** Geometry optimized structure of  $(P)\text{-C}_{\text{Naph}_4}$ , displayed in front, side and top view.

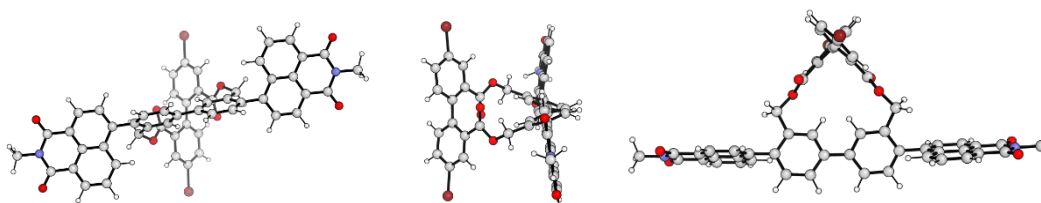

**Figure S43.** Geometry optimized structure of  $(P)\text{-C}_{\text{Br}_2\text{NI}_2}$  configuration 1, displayed in front, side and top view.

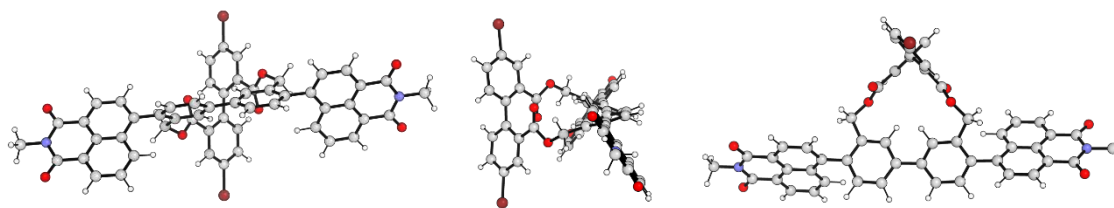

**Figure S44.** Geometry optimized structure of  $(P)\text{-C}_{\text{Br}_2\text{Ni}_2}$  configuration 2, displayed in front, side and top view.

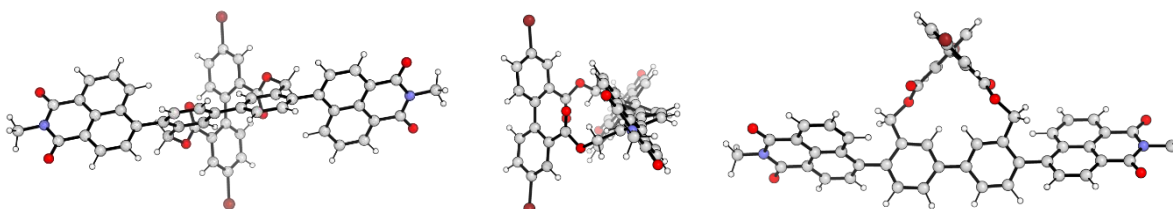

**Figure S45.** Geometry optimized structure of  $(P)\text{-C}_{\text{Br}_2\text{Ni}_2}$  configuration 3, displayed in front, side and top view.

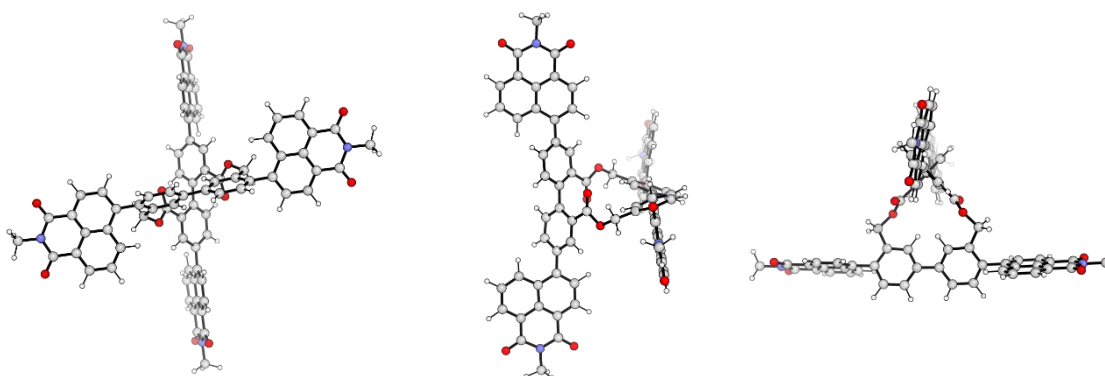

**Figure S46.** Geometry optimized structure of  $(P)\text{-C}_{\text{Ni}_4}$ , displayed in front, side and top view.

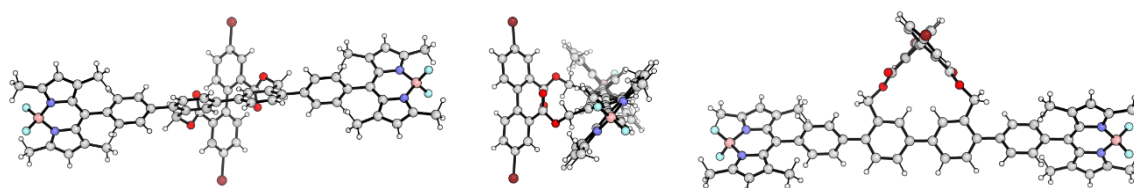

**Figure S47.** Geometry optimized structure of  $(P)\text{-C}_{\text{Br}_2\text{BY}_2}$ , displayed in front, side and top view.

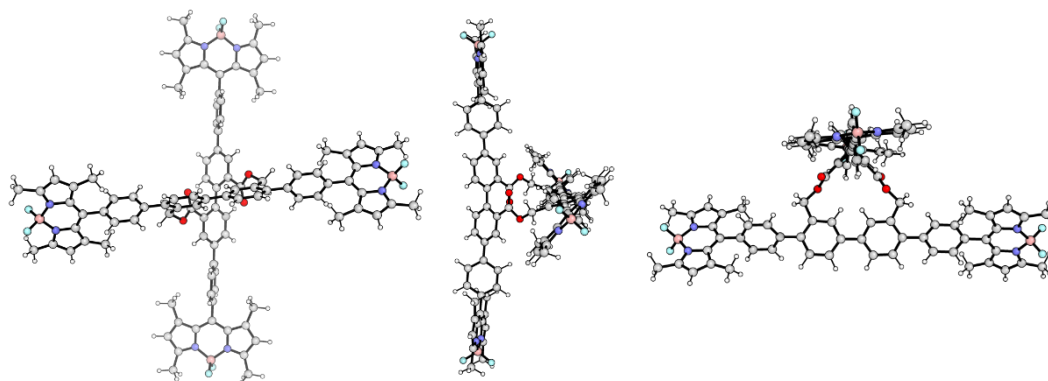

**Figure S48.** Geometry optimized structure of (*P*)-**C<sub>BY4</sub>**, displayed in front, side and top view.

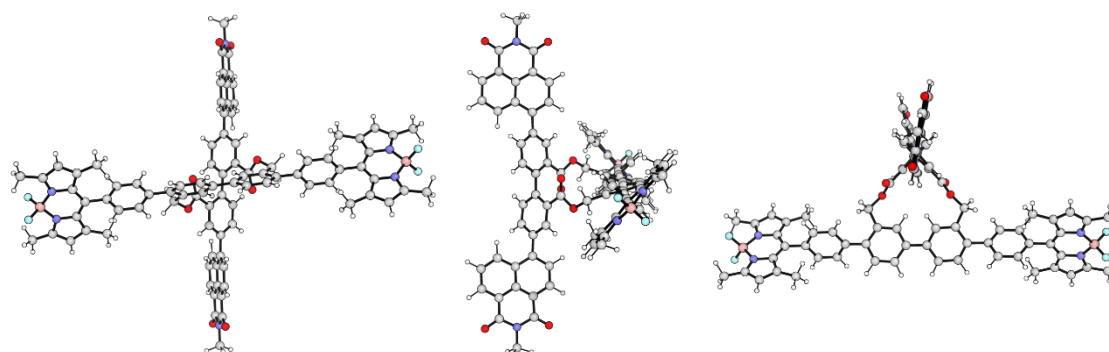

**Figure S49.** Geometry optimized structure of (*P*)-**C<sub>Ni2BY2</sub>**, displayed in front, side and top view.

### Coordinates (energies in kcal)

|                          |                           |          |          |   |          |          |          |
|--------------------------|---------------------------|----------|----------|---|----------|----------|----------|
| 52                       |                           |          |          | H | -0.95317 | -0.96790 | -0.81970 |
| <b>C<sub>Br2I2</sub></b> | Energy: -12722570.5715545 |          |          | C | -0.60462 | 3.15806  | -3.50232 |
| I                        | -5.64864                  | -2.73140 | 0.72209  | C | 0.73953  | -2.91360 | -0.07309 |
| I                        | 5.64854                   | -2.73176 | -0.72133 | C | 0.60476  | 3.15916  | 3.50147  |
| Br                       | -0.91807                  | 3.20280  | -5.40396 | C | -1.43315 | -3.99528 | 0.63178  |
| Br                       | 0.91808                   | 3.20439  | 5.40313  | H | -0.89187 | -4.87224 | 0.96672  |
| O                        | -2.67036                  | 0.50009  | -1.25895 | C | 3.51499  | -2.78675 | -0.41047 |
| O                        | -2.30339                  | 1.60267  | 0.72950  | C | 1.46482  | -1.78690 | 0.33471  |
| O                        | 2.67026                   | 0.50018  | 1.25903  | H | 0.95309  | -0.96784 | 0.81998  |
| O                        | 2.30364                   | 1.60238  | -0.72972 | C | -0.14741 | 3.09961  | -0.73569 |
| C                        | -1.38565                  | 2.35270  | -2.69462 | C | -0.64223 | 3.88954  | 1.57870  |
| H                        | -2.16287                  | 1.73643  | -3.11822 | H | -1.45446 | 4.46371  | 1.15252  |
| C                        | 1.38570                   | 2.35339  | 2.69408  | C | 1.43297  | -3.99541 | -0.63113 |
| H                        | 2.16279                   | 1.73713  | 3.11794  | H | 0.89167  | -4.87238 | -0.96601 |
| C                        | -0.73968                  | -2.91357 | 0.07360  | C | 2.07702  | 1.49071  | 0.46854  |
| C                        | 1.17869                   | 2.32914  | 1.30628  | C | -3.51512 | -2.78653 | 0.41109  |
| C                        | -2.07691                  | 1.49073  | -0.46877 | C | -3.58027 | -0.43171 | -0.56731 |
| C                        | 2.84642                   | -1.69816 | 0.15820  | H | -4.37414 | -0.64280 | -1.28572 |
| C                        | -1.17856                  | 2.32885  | -1.30681 | H | -3.98314 | 0.06566  | 0.31983  |
| C                        | -2.84652                  | -1.69804 | -0.15774 | C | 3.58022  | -0.43183 | 0.56768  |
| C                        | 0.14770                   | 3.09987  | 0.73485  | H | 4.37393  | -0.64286 | 1.28629  |
| C                        | -0.41053                  | 3.93326  | 2.94967  | H | 3.98329  | 0.06537  | -0.31946 |
| H                        | -1.02304                  | 4.55258  | 3.59060  | C | 0.41088  | 3.93212  | -2.95084 |
| C                        | -1.46494                  | -1.78687 | -0.33430 | H | 1.02348  | 4.55110  | -3.59201 |
|                          |                           |          |          | C | 0.64265  | 3.88882  | -1.57987 |

|   |          |          |          |
|---|----------|----------|----------|
| H | 1.45504  | 4.46294  | -1.15393 |
| C | 2.81681  | -3.93138 | -0.79420 |
| H | 3.34769  | -4.76400 | -1.23661 |
| C | -2.81698 | -3.93116 | 0.79490  |
| H | -3.34789 | -4.76371 | 1.23743  |

92

**C**<sub>Br<sub>2</sub>Naph<sub>2</sub></sub> Energy: -4718790.1902745

|    |          |          |          |
|----|----------|----------|----------|
| Br | 1.22778  | 3.89719  | 5.36038  |
| Br | -1.22779 | 3.89728  | -5.36033 |
| O  | 2.70271  | 1.09596  | 1.12809  |
| O  | 1.97917  | 2.01511  | -0.84209 |
| O  | -2.70271 | 1.09596  | -1.12810 |
| O  | -1.97920 | 2.01508  | 0.84210  |
| C  | 1.48067  | 2.97507  | 2.64002  |
| H  | 2.23149  | 2.31021  | 3.04343  |
| C  | -1.48068 | 2.97511  | -2.63999 |
| H  | -2.23150 | 2.31025  | -3.04341 |
| C  | 0.74030  | -2.43279 | -0.05937 |
| C  | -1.19531 | 2.93643  | -1.26173 |
| C  | 1.96506  | 2.00517  | 0.39711  |
| C  | -2.83628 | -1.15780 | -0.07662 |
| C  | 1.19529  | 2.93641  | 1.26175  |
| C  | 2.83628  | -1.15779 | 0.07658  |
| C  | -0.19634 | 3.78532  | -0.72376 |
| C  | 0.14787  | 4.74309  | -2.94644 |
| H  | 0.65719  | 5.44256  | -3.59856 |
| C  | 1.45272  | -1.25476 | 0.23493  |
| H  | 0.90969  | -0.40604 | 0.62826  |
| C  | 0.80602  | 3.86669  | 3.45969  |
| C  | -0.74029 | -2.43280 | 0.05932  |
| C  | -0.80604 | 3.86674  | -3.45965 |
| C  | 1.47218  | -3.55796 | -0.47644 |
| H  | 0.95825  | -4.48050 | -0.72858 |
| C  | -3.56672 | -2.29026 | 0.36188  |
| C  | -1.45272 | -1.25477 | -0.23497 |
| H  | -0.90969 | -0.40605 | -0.62831 |
| C  | 0.19632  | 3.78531  | 0.72381  |
| C  | 0.44613  | 4.69133  | -1.58328 |
| H  | 1.21089  | 5.34664  | -1.17990 |
| C  | -1.47217 | -3.55797 | 0.47639  |
| H  | -0.95823 | -4.48050 | 0.72853  |
| C  | -1.96508 | 2.00517  | -0.39711 |
| C  | 3.56673  | -2.29025 | -0.36192 |
| C  | 3.55750  | 0.14143  | 0.39205  |
| H  | 4.40441  | -0.02246 | 1.06072  |
| H  | 3.90190  | 0.64172  | -0.51629 |
| C  | -3.55750 | 0.14141  | -0.39209 |
| H  | -4.40440 | -0.02248 | -1.06078 |
| H  | -3.90192 | 0.64169  | 0.51626  |
| C  | -0.14789 | 4.74303  | 2.94650  |
| H  | -0.65721 | 5.44250  | 3.59863  |

|   |           |          |          |
|---|-----------|----------|----------|
| C | -0.44615  | 4.69130  | 1.58334  |
| H | -1.21092  | 5.34662  | 1.17997  |
| C | -2.86130  | -3.48245 | 0.61399  |
| H | -3.41474  | -4.35081 | 0.95947  |
| C | 2.86132   | -3.48244 | -0.61403 |
| H | 3.41476   | -4.35079 | -0.95951 |
| C | 5.04725   | -2.25298 | -0.55921 |
| C | 5.88512   | -3.07743 | 0.17759  |
| C | 5.62801   | -1.39005 | -1.54296 |
| C | 7.29678   | -3.07114 | -0.01224 |
| H | 5.46251   | -3.73909 | 0.92989  |
| C | 6.99034   | -1.36256 | -1.75500 |
| H | 4.97487   | -0.76883 | -2.14923 |
| C | 8.16908   | -3.90266 | 0.74241  |
| C | 7.87014   | -2.19332 | -0.99744 |
| H | 7.41147   | -0.70911 | -2.51413 |
| C | 9.53830   | -3.87950 | 0.54345  |
| H | 7.74496   | -4.56777 | 1.48981  |
| C | 9.27492   | -2.18361 | -1.18774 |
| C | 10.09222  | -3.00894 | -0.43351 |
| H | 10.17674  | -4.52524 | 1.13413  |
| H | 9.72511   | -1.52932 | -1.92668 |
| C | -5.04724  | -2.25300 | 0.55919  |
| C | -5.88511  | -3.07743 | -0.17763 |
| C | -5.62799  | -1.39008 | 1.54295  |
| C | -7.29677  | -3.07115 | 0.01221  |
| H | -5.46251  | -3.73908 | -0.92994 |
| C | -6.99031  | -1.36261 | 1.75500  |
| H | -4.97485  | -0.76888 | 2.14923  |
| C | -8.16908  | -3.90265 | -0.74245 |
| C | -7.87013  | -2.19335 | 0.99743  |
| H | -7.41144  | -0.70916 | 2.51415  |
| C | -9.53829  | -3.87950 | -0.54348 |
| H | -7.74496  | -4.56775 | -1.48986 |
| C | -9.27490  | -2.18364 | 1.18774  |
| C | -10.09220 | -3.00896 | 0.43351  |
| H | -10.17673 | -4.52522 | -1.13416 |
| H | -9.72509  | -1.52937 | 1.92670  |
| O | 11.45985  | -2.92468 | -0.69602 |
| O | -11.45984 | -2.92470 | 0.69603  |
| C | 12.38690  | -3.75909 | 0.05442  |
| H | 12.18588  | -4.82354 | -0.11408 |
| H | 13.37040  | -3.50290 | -0.33775 |
| H | 12.34405  | -3.53235 | 1.12615  |
| C | -12.38689 | -3.75910 | -0.05443 |
| H | -12.18587 | -4.82355 | 0.11405  |
| H | -13.37039 | -3.50291 | 0.33776  |
| H | -12.34405 | -3.53233 | -1.12615 |

132

**C**<sub>Naph<sub>4</sub></sub> Energy: -2118523.8924662

|   |          |         |          |
|---|----------|---------|----------|
| O | -2.85642 | 0.63854 | -0.10930 |
|---|----------|---------|----------|



|   |          |          |          |   |           |          |          |
|---|----------|----------|----------|---|-----------|----------|----------|
| O | -1.11354 | 1.82208  | -1.01041 | H | -2.96456  | 4.58130  | 1.79243  |
| O | 2.85642  | -0.63854 | -0.10929 | C | -7.16921  | 3.91576  | 4.99514  |
| O | 1.11354  | -1.82208 | -1.01041 | C | -5.98803  | 5.21193  | 3.27388  |
| C | -2.77482 | -1.25067 | -2.05625 | H | -4.79366  | 6.23095  | 1.77439  |
| H | -3.63035 | -1.10743 | -1.40902 | C | -8.20019  | 4.83886  | 4.99664  |
| C | 2.77483  | 1.25067  | -2.05625 | H | -7.21753  | 3.05384  | 5.65520  |
| H | 3.63035  | 1.10743  | -1.40902 | C | -7.05311  | 6.14753  | 3.28964  |
| C | -0.57801 | 0.46659  | 3.42912  | C | -8.13647  | 5.96519  | 4.13272  |
| C | 1.72049  | 0.32237  | -1.97582 | H | -9.04741  | 4.69521  | 5.65622  |
| C | -1.83039 | 0.81073  | -1.02395 | H | -7.03097  | 7.01663  | 2.64079  |
| C | 2.37646  | -1.55722 | 2.15605  | C | 3.87635   | -3.28549 | 3.28416  |
| C | -1.72049 | -0.32237 | -1.97582 | C | 4.96834   | -3.12975 | 4.12619  |
| C | -2.37646 | 1.55722  | 2.15605  | C | 3.83251   | -4.43190 | 2.42784  |
| C | 0.58749  | 0.46685  | -2.81538 | C | 6.03954   | -4.06814 | 4.14505  |
| C | 1.63638  | 2.43888  | -3.81023 | H | 5.02139   | -2.26426 | 4.78220  |
| H | 1.57509  | 3.26802  | -4.50825 | C | 4.85097   | -5.36172 | 2.42391  |
| C | -1.32015 | 0.64847  | 2.24673  | H | 2.96456   | -4.58130 | 1.79243  |
| H | -1.08336 | 0.03875  | 1.38565  | C | 7.16920   | -3.91576 | 4.99514  |
| C | -2.75798 | -2.31778 | -2.96661 | C | 5.98802   | -5.21193 | 3.27388  |
| C | 0.57800  | -0.46659 | 3.42912  | H | 4.79366   | -6.23095 | 1.77439  |
| C | 2.75798  | 2.31779  | -2.96661 | C | 8.20018   | -4.83887 | 4.99664  |
| C | -0.96232 | 1.20108  | 4.56482  | H | 7.21752   | -3.05385 | 5.65520  |
| H | -0.40502 | 1.10566  | 5.49160  | C | 7.05310   | -6.14753 | 3.28964  |
| C | 2.75231  | -2.30176 | 3.30219  | C | 8.13646   | -5.96519 | 4.13273  |
| C | 1.32015  | -0.64847 | 2.24673  | H | 9.04741   | -4.69522 | 5.65623  |
| H | 1.08336  | -0.03874 | 1.38565  | H | 7.03096   | -7.01663 | 2.64079  |
| C | -0.58749 | -0.46684 | -2.81538 | O | -9.13229  | 6.94126  | 4.07305  |
| C | 0.58135  | 1.53087  | -3.73270 | O | 9.13228   | -6.94126 | 4.07306  |
| H | -0.28665 | 1.66231  | -4.37097 | C | -10.30473 | 6.82190  | 4.92701  |
| C | 0.96231  | -1.20109 | 4.56482  | H | -10.02567 | 6.84277  | 5.98704  |
| H | 0.40502  | -1.10566 | 5.49160  | H | -10.91188 | 7.69436  | 4.68828  |
| C | 1.83039  | -0.81073 | -1.02395 | H | -10.86562 | 5.90692  | 4.70306  |
| C | -2.75232 | 2.30176  | 3.30219  | C | 10.30472  | -6.82191 | 4.92701  |
| C | -3.12506 | 1.73134  | 0.84563  | H | 10.02567  | -6.84278 | 5.98704  |
| H | -4.20582 | 1.69481  | 0.99424  | H | 10.91187  | -7.69437 | 4.68828  |
| H | -2.85662 | 2.67008  | 0.35414  | H | 10.86562  | -5.90692 | 4.70307  |
| C | 3.12506  | -1.73134 | 0.84563  | C | -3.88812  | -3.28064 | -3.03783 |
| H | 4.20582  | -1.69481 | 0.99424  | C | -4.31932  | -3.80079 | -4.25099 |
| H | 2.85662  | -2.67008 | 0.35414  | C | -4.56042  | -3.69443 | -1.84332 |
| C | -1.63637 | -2.43887 | -3.81023 | C | -5.39920  | -4.72402 | -4.32936 |
| H | -1.57508 | -3.26802 | -4.50825 | H | -3.84579  | -3.48379 | -5.17665 |
| C | -0.58135 | -1.53087 | -3.73270 | C | -5.60967  | -4.58705 | -1.88405 |
| H | 0.28666  | -1.66230 | -4.37097 | H | -4.21563  | -3.31421 | -0.88686 |
| C | 2.03708  | -2.09173 | 4.49720  | C | -5.85412  | -5.25869 | -5.56631 |
| H | 2.31189  | -2.66851 | 5.37561  | C | -6.06701  | -5.13125 | -3.12189 |
| C | -2.03709 | 2.09173  | 4.49720  | H | -6.09788  | -4.89655 | -0.96404 |
| H | -2.31190 | 2.66850  | 5.37561  | C | -6.90801  | -6.15379 | -5.62141 |
| C | -3.87636 | 3.28549  | 3.28416  | H | -5.35807  | -4.95479 | -6.48425 |
| C | -4.96834 | 3.12975  | 4.12619  | C | -7.14430  | -6.04929 | -3.19753 |
| C | -3.83251 | 4.43190  | 2.42784  | C | -7.55654  | -6.55041 | -4.42099 |
| C | -6.03954 | 4.06813  | 4.14505  | H | -7.22995  | -6.54454 | -6.57911 |
| H | -5.02139 | 2.26425  | 4.78219  | H | -7.65842  | -6.36869 | -2.29724 |
| C | -4.85097 | 5.36172  | 2.42392  | O | -8.62606  | -7.44702 | -4.38894 |

|   |          |          |          |   |          |          |          |
|---|----------|----------|----------|---|----------|----------|----------|
| C | -9.12156 | -8.01547 | -5.63345 | H | 0.88757  | -4.36410 | -0.86573 |
| H | -8.34498 | -8.60340 | -6.13676 | C | -3.52110 | -2.20529 | 0.57043  |
| H | -9.94135 | -8.66745 | -5.33390 | C | -1.46475 | -1.18429 | -0.18676 |
| H | -9.49564 | -7.23313 | -6.30432 | H | -0.94382 | -0.34036 | -0.62421 |
| C | 3.88812  | 3.28064  | -3.03782 | C | 0.25221  | 3.79712  | 0.70646  |
| C | 4.31932  | 3.80079  | -4.25099 | C | 0.32477  | 4.71171  | -1.59718 |
| C | 4.56042  | 3.69443  | -1.84331 | H | 1.13755  | 5.34245  | -1.24720 |
| C | 5.39921  | 4.72402  | -4.32936 | C | -1.42590 | -3.45384 | 0.61341  |
| H | 3.84580  | 3.48379  | -5.17665 | H | -0.88756 | -4.36411 | 0.86568  |
| C | 5.60967  | 4.58705  | -1.88404 | C | -1.99492 | 2.01709  | -0.26013 |
| H | 4.21563  | 3.31422  | -0.88686 | C | 3.52110  | -2.20528 | -0.57046 |
| C | 5.85413  | 5.25869  | -5.56631 | C | 3.56890  | 0.22061  | 0.18182  |
| C | 6.06702  | 5.13126  | -3.12188 | H | 4.48176  | 0.06296  | 0.76258  |
| H | 6.09788  | 4.89656  | -0.96403 | H | 3.83635  | 0.67334  | -0.77961 |
| C | 6.90802  | 6.15379  | -5.62141 | C | -3.56890 | 0.22061  | -0.18182 |
| H | 5.35808  | 4.95478  | -6.48424 | H | -4.48176 | 0.06296  | -0.76259 |
| C | 7.14430  | 6.04930  | -3.19752 | H | -3.83636 | 0.67332  | 0.77962  |
| C | 7.55655  | 6.55041  | -4.42098 | C | 0.10488  | 4.82432  | 2.91643  |
| H | 7.22996  | 6.54454  | -6.57911 | H | -0.35880 | 5.53940  | 3.58875  |
| H | 7.65842  | 6.36869  | -2.29724 | C | -0.32477 | 4.71170  | 1.59723  |
| O | 8.62606  | 7.44702  | -4.38894 | H | -1.13756 | 5.34244  | 1.24724  |
| C | 9.12157  | 8.01547  | -5.63345 | C | -2.79980 | -3.37804 | 0.83692  |
| H | 8.34499  | 8.60340  | -6.13675 | H | -3.32907 | -4.23834 | 1.24010  |
| H | 9.94136  | 8.66745  | -5.33389 | C | 2.79980  | -3.37803 | -0.83696 |
| H | 9.49565  | 7.23313  | -6.30431 | H | 3.32908  | -4.23833 | -1.24014 |

98

**C<sub>Br<sub>2</sub>Ni<sub>2</sub></sub>** (conf1) Energy: -4977464.1927304

|    |          |          |          |   |          |          |          |
|----|----------|----------|----------|---|----------|----------|----------|
| Br | 1.74071  | 4.13930  | 5.16027  | C | 5.41028  | -1.97322 | -2.18181 |
| Br | -1.74072 | 4.13934  | -5.16024 | C | 5.62210  | -2.55376 | 1.52217  |
| O  | 2.80448  | 1.16756  | 0.94952  | C | 7.35236  | -2.28495 | -0.18605 |
| O  | 1.86608  | 1.97189  | -0.94231 | C | 6.77882  | -1.93301 | -2.51543 |
| O  | -2.80448 | 1.16757  | -0.94951 | H | 4.66603  | -1.84914 | -2.96447 |
| O  | -1.86608 | 1.97188  | 0.94232  | C | 6.59927  | -2.70890 | 2.48589  |
| C  | 1.73799  | 3.08856  | 2.50599  | H | 4.57208  | -2.60669 | 1.79642  |
| H  | 2.54395  | 2.45636  | 2.85711  | C | 8.33836  | -2.44821 | 0.82116  |
| C  | -1.73800 | 3.08858  | -2.50596 | C | 7.74108  | -2.08251 | -1.53437 |
| H  | -2.54395 | 2.45638  | -2.85709 | H | 7.10088  | -1.78204 | -3.54172 |
| C  | 0.73428  | -2.34668 | -0.10474 | C | 7.96393  | -2.65462 | 2.13755  |
| C  | -1.30887 | 2.98372  | -1.17266 | H | 6.31632  | -2.87851 | 3.52152  |
| C  | 1.99492  | 2.01709  | 0.26014  | H | 8.74245  | -2.77577 | 2.88493  |
| C  | -2.83337 | -1.08732 | 0.05224  | C | -4.98686 | -2.16093 | 0.87388  |
| C  | 1.30887  | 2.98372  | 1.17269  | C | -5.96549 | -2.33065 | -0.16082 |
| C  | 2.83337  | -1.08731 | -0.05225 | C | -5.41027 | -1.97327 | 2.18180  |
| C  | -0.25221 | 3.79712  | -0.70643 | C | -5.62210 | -2.55372 | -1.52220 |
| C  | -0.10489 | 4.82434  | -2.91639 | C | -7.35236 | -2.28495 | 0.18603  |
| H  | 0.35879  | 5.53944  | -3.58870 | C | -6.77881 | -1.93307 | 2.51542  |
| C  | 1.46475  | -1.18428 | 0.18675  | H | -4.66602 | -1.84921 | 2.96445  |
| H  | 0.94382  | -0.34036 | 0.62420  | C | -6.59927 | -2.70884 | -2.48592 |
| C  | 1.13865  | 4.00250  | 3.36292  | H | -4.57208 | -2.60664 | -1.79645 |
| C  | -0.73428 | -2.34668 | 0.10471  | C | -8.33836 | -2.44818 | -0.82118 |
| C  | -1.13865 | 4.00253  | -3.36289 | C | -7.74107 | -2.08254 | 1.53436  |
| C  | 1.42591  | -3.45383 | -0.61345 | H | -7.10087 | -1.78213 | 3.54171  |
|    |          |          |          | C | -7.96393 | -2.65456 | -2.13758 |

|   |           |          |          |   |          |          |          |
|---|-----------|----------|----------|---|----------|----------|----------|
| H | -6.31632  | -2.87842 | -3.52156 | C | -1.11471 | 3.86125  | 2.55150  |
| H | -8.74245  | -2.77570 | -2.88496 | H | -1.93608 | 4.52574  | 2.29717  |
| C | 9.17733   | -2.03304 | -1.90627 | C | 1.84686  | -2.95295 | -1.79902 |
| C | 9.78595   | -2.40207 | 0.48259  | H | 1.45188  | -3.77834 | -2.38610 |
| C | -9.17732  | -2.03308 | 1.90626  | C | 1.69147  | 1.97643  | 0.81873  |
| C | -9.78595  | -2.40205 | -0.48261 | C | -3.32722 | -2.37436 | -1.14447 |
| O | -9.56009  | -1.86093 | 3.05211  | C | -3.51138 | 0.16022  | -1.22706 |
| O | 9.56010   | -1.86085 | -3.05211 | H | -4.24097 | 0.13199  | -2.04245 |
| O | 10.65669  | -2.53562 | 1.32672  | H | -4.04836 | 0.28899  | -0.28189 |
| O | -10.65669 | -2.53559 | -1.32674 | C | 3.44864  | 0.41382  | 0.40297  |
| N | -10.10750 | -2.19508 | 0.86969  | H | 4.29120  | 0.11824  | 1.03493  |
| N | 10.10750  | -2.19506 | -0.86970 | H | 3.78501  | 1.19205  | -0.28976 |
| C | 11.52228  | -2.14226 | -1.25528 | C | -0.21007 | 5.60531  | -1.52554 |
| H | 12.11818  | -2.28044 | -0.35503 | H | 0.26621  | 6.53770  | -1.81218 |
| H | 11.73756  | -2.92878 | -1.98406 | C | 0.01821  | 5.05105  | -0.26929 |
| H | 11.74400  | -1.17733 | -1.71976 | H | 0.68762  | 5.55706  | 0.42121  |
| C | -11.52227 | -2.14229 | 1.25528  | C | 3.22332  | -2.74346 | -1.74018 |
| H | -12.11817 | -2.28043 | 0.35502  | H | 3.89331  | -3.41838 | -2.26792 |
| H | -11.73756 | -2.92883 | 1.98402  | C | -2.53568 | -3.53251 | -1.14958 |
| H | -11.74399 | -1.17737 | 1.71979  | H | -3.02747 | -4.50168 | -1.11088 |

98

**C<sub>Br<sub>2</sub>Ni<sub>2</sub></sub>** (conf2) Energy: -4977464.6192172

|    |          |          |          |   |          |          |          |
|----|----------|----------|----------|---|----------|----------|----------|
| Br | -1.38226 | 5.68136  | -4.13310 | C | -5.47966 | -2.98568 | -2.23764 |
| Br | 0.44049  | 2.16234  | 6.01336  | C | -4.97685 | -1.75353 | 1.27540  |
| O  | -2.72593 | 1.33932  | -1.47774 | C | -6.99498 | -2.36092 | 0.03315  |
| O  | -2.24148 | 1.48800  | 0.72351  | C | -6.87909 | -3.14332 | -2.25811 |
| O  | 2.48539  | 0.98533  | 1.30757  | H | -4.90230 | -3.22897 | -3.12610 |
| O  | 1.74896  | 2.35972  | -0.32788 | C | -5.74764 | -1.46303 | 2.38406  |
| C  | -1.67290 | 3.75225  | -2.04923 | H | -3.89713 | -1.64203 | 1.32265  |
| H  | -2.33462 | 3.24534  | -2.74043 | C | -7.76484 | -2.05636 | 1.18539  |
| C  | 0.96944  | 2.14577  | 3.20807  | C | -7.63375 | -2.83155 | -1.14225 |
| H  | 1.78366  | 1.47830  | 3.46131  | H | -7.38857 | -3.50629 | -3.14593 |
| C  | -0.50152 | -2.21952 | -1.19145 | C | -7.14861 | -1.61123 | 2.34156  |
| C  | 0.76341  | 2.50564  | 1.86596  | H | -5.27048 | -1.12023 | 3.29831  |
| C  | -2.15979 | 1.94062  | -0.39647 | H | -7.76734 | -1.38683 | 3.20551  |
| C  | 2.89969  | -0.77807 | -0.36293 | C | 5.25041  | -1.43619 | -1.05673 |
| C  | -1.44934 | 3.20075  | -0.77685 | C | 6.13522  | -2.28862 | -0.31659 |
| C  | -2.68833 | -1.11614 | -1.19931 | C | 5.78429  | -0.40253 | -1.81452 |
| C  | -0.30193 | 3.36756  | 1.52260  | C | 5.67883  | -3.35453 | 0.50667  |
| C  | -0.90655 | 3.51461  | 3.88335  | C | 7.54470  | -2.05287 | -0.39281 |
| H  | -1.55025 | 3.90909  | 4.66337  | C | 7.17252  | -0.17644 | -1.88133 |
| C  | -1.29764 | -1.06408 | -1.24014 | H | 5.11380  | 0.23487  | -2.38600 |
| H  | -0.80929 | -0.10095 | -1.33437 | C | 6.56922  | -4.14850 | 1.20237  |
| C  | -1.05755 | 4.94317  | -2.41255 | H | 4.61130  | -3.53776 | 0.58390  |
| C  | 0.97371  | -2.07773 | -1.13885 | C | 8.43924  | -2.88444 | 0.32911  |
| C  | 0.14009  | 2.65013  | 4.20128  | C | 8.04754  | -0.98921 | -1.18402 |
| C  | -1.14372 | -3.46420 | -1.16353 | H | 7.57952  | 0.63039  | -2.48372 |
| H  | -0.55878 | -4.37935 | -1.11576 | C | 7.95671  | -3.91764 | 1.11271  |
| C  | 3.77067  | -1.65585 | -1.04195 | H | 6.19911  | -4.95743 | 1.82692  |
| C  | 1.52803  | -1.01502 | -0.40938 | H | 8.66879  | -4.53479 | 1.65281  |
| H  | 0.86159  | -0.37461 | 0.15621  | C | -9.10921 | -3.00263 | -1.19467 |
| C  | -0.58040 | 3.84866  | 0.12911  | C | -9.24154 | -2.21407 | 1.16583  |
|    |          |          |          | C | 9.50802  | -0.72993 | -1.27757 |

|   |           |          |          |
|---|-----------|----------|----------|
| C | 9.90475   | -2.65463 | 0.25514  |
| O | 9.96685   | 0.17876  | -1.95040 |
| O | -9.68373  | -3.40379 | -2.19375 |
| O | -9.94814  | -1.96026 | 2.12780  |
| O | 10.71462  | -3.34391 | 0.85360  |
| N | 10.34342  | -1.59058 | -0.54607 |
| N | -9.81769  | -2.67682 | -0.02628 |
| C | -11.27728 | -2.82632 | -0.02481 |
| H | -11.74835 | -1.86300 | 0.18991  |
| H | -11.57578 | -3.18881 | -1.00675 |
| H | -11.57692 | -3.53323 | 0.75401  |
| C | 11.79424  | -1.37971 | -0.60542 |
| H | 12.28372  | -2.27796 | -0.99211 |
| H | 11.98061  | -0.52973 | -1.25924 |
| H | 12.18224  | -1.18557 | 0.39849  |

98

**C<sub>Br<sub>2</sub>Ni<sub>2</sub></sub>** (conf3) Energy: -4977464.9633058

|    |          |          |          |
|----|----------|----------|----------|
| Br | 0.18211  | 3.76322  | 5.44320  |
| Br | -0.18207 | 3.76286  | -5.44340 |
| O  | 2.41887  | 0.80161  | 1.71145  |
| O  | 2.07875  | 1.61990  | -0.36645 |
| O  | -2.41887 | 0.80153  | -1.71145 |
| O  | -2.07873 | 1.61994  | 0.36640  |
| C  | 0.94795  | 2.71979  | 2.89880  |
| H  | 1.62156  | 2.08956  | 3.46594  |
| C  | -0.94793 | 2.71961  | -2.89893 |
| H  | -1.62155 | 2.08935  | -3.46603 |
| C  | 0.73563  | -2.69241 | 0.09279  |
| C  | -0.92101 | 2.61707  | -1.49818 |
| C  | 1.84709  | 1.65672  | 0.82126  |
| C  | -2.74337 | -1.42362 | -0.69266 |
| C  | 0.92104  | 2.61716  | 1.49806  |
| C  | 2.74335  | -1.42360 | 0.69277  |
| C  | -0.03901 | 3.42738  | -0.74917 |
| C  | 0.74147  | 4.44853  | -2.82489 |
| H  | 1.38146  | 5.16057  | -3.33653 |
| C  | 1.36068  | -1.52836 | 0.56677  |
| H  | 0.73831  | -0.69348 | 0.86733  |
| C  | 0.12361  | 3.62927  | 3.54848  |
| C  | -0.73565 | -2.69241 | -0.09262 |
| C  | -0.12357 | 3.62903  | -3.54867 |
| C  | 1.53940  | -3.80005 | -0.20601 |
| H  | 1.08964  | -4.71483 | -0.58400 |
| C  | -3.54845 | -2.53645 | -0.36427 |
| C  | -1.36069 | -1.52838 | -0.56664 |
| H  | -0.73832 | -0.69352 | -0.86724 |
| C  | 0.03905  | 3.42743  | 0.74899  |
| C  | 0.77370  | 4.33742  | -1.43783 |
| H  | 1.45462  | 4.96567  | -0.86988 |
| C  | -1.53942 | -3.80004 | 0.20622  |
| H  | -1.08967 | -4.71481 | 0.58424  |
| C  | -1.84707 | 1.65669  | -0.82132 |

|   |           |          |          |
|---|-----------|----------|----------|
| C | 3.54843   | -2.53644 | 0.36442  |
| C | 3.37770   | -0.13547 | 1.18860  |
| H | 4.05838   | -0.33521 | 2.02189  |
| H | 3.94114   | 0.34857  | 0.38440  |
| C | -3.37771  | -0.13551 | -1.18854 |
| H | -4.05841  | -0.33528 | -2.02181 |
| H | -3.94112  | 0.34858  | -0.38435 |
| C | -0.74142  | 4.44872  | 2.82464  |
| H | -1.38141  | 5.16081  | 3.33624  |
| C | -0.77366  | 4.33753  | 1.43759  |
| H | -1.45457  | 4.96575  | 0.86960  |
| C | -2.92334  | -3.71780 | 0.06241  |
| H | -3.54306  | -4.57590 | 0.31195  |
| C | 2.92332   | -3.71781 | -0.06221 |
| H | 3.54304   | -4.57591 | -0.31173 |
| C | 5.03874   | -2.50732 | 0.48815  |
| C | 5.85344   | -1.77478 | -0.43838 |
| C | 5.65154   | -3.22724 | 1.50494  |
| C | 5.31767   | -1.04855 | -1.53737 |
| C | 7.27375   | -1.78737 | -0.26775 |
| C | 7.05110   | -3.23708 | 1.66311  |
| H | 5.03167   | -3.78686 | 2.20098  |
| C | 6.14231   | -0.35675 | -2.40272 |
| H | 4.24260   | -1.04475 | -1.69447 |
| C | 8.10078   | -1.06883 | -1.16989 |
| C | 7.85603   | -2.52348 | 0.79484  |
| H | 7.52057   | -3.79715 | 2.46665  |
| C | 7.53965   | -0.36190 | -2.21910 |
| H | 5.71153   | 0.19373  | -3.23486 |
| H | 8.19936   | 0.17782  | -2.89202 |
| C | -5.03876  | -2.50733 | -0.48802 |
| C | -5.85346  | -1.77476 | 0.43848  |
| C | -5.65155  | -3.22729 | -1.50479 |
| C | -5.31770  | -1.04849 | 1.53745  |
| C | -7.27377  | -1.78735 | 0.26784  |
| C | -7.05111  | -3.23713 | -1.66297 |
| H | -5.03168  | -3.78693 | -2.20080 |
| C | -6.14234  | -0.35665 | 2.40276  |
| H | -4.24264  | -1.04469 | 1.69456  |
| C | -8.10081  | -1.06877 | 1.16994  |
| C | -7.85604  | -2.52349 | -0.79473 |
| H | -7.52057  | -3.79723 | -2.46650 |
| C | -7.53968  | -0.36180 | 2.21913  |
| H | -5.71158  | 0.19386  | 3.23488  |
| H | -8.19940  | 0.17795  | 2.89202  |
| C | 9.32830   | -2.54215 | 0.98324  |
| C | 9.57906   | -1.06420 | -1.00776 |
| C | -9.32831  | -2.54216 | -0.98315 |
| C | -9.57909  | -1.06414 | 1.00779  |
| O | -9.87363  | -3.15956 | -1.88371 |
| O | 9.87363   | -3.15951 | 1.88382  |
| O | 10.31551  | -0.45095 | -1.76287 |
| O | -10.31554 | -0.45086 | 1.76288  |

|   |           |          |          |
|---|-----------|----------|----------|
| N | -10.09474 | -1.80725 | -0.06811 |
| N | 10.09472  | -1.80727 | 0.06817  |
| C | 11.54771  | -1.83551 | 0.27023  |
| H | 12.00388  | -1.22552 | -0.50725 |
| H | 11.79182  | -1.44250 | 1.26118  |
| H | 11.91006  | -2.86584 | 0.21352  |
| C | -11.54773 | -1.83549 | -0.27018 |
| H | -12.00391 | -1.22551 | 0.50729  |
| H | -11.79183 | -1.44249 | -1.26114 |
| H | -11.91007 | -2.86582 | -0.21348 |

144

**C<sub>Ni4</sub>** (conf1) Energy: -2635205.1885973

|   |          |          |          |
|---|----------|----------|----------|
| O | -2.85783 | -0.76993 | -0.13928 |
| O | -1.02743 | -1.82049 | 0.66832  |
| O | 2.85783  | 0.76993  | -0.13928 |
| O | 1.02743  | 1.82049  | 0.66832  |
| C | -2.83067 | 1.12569  | 1.78245  |
| H | -3.69474 | 0.95886  | 1.14903  |
| C | 2.83067  | -1.12570 | 1.78244  |
| H | 3.69475  | -0.95886 | 1.14902  |
| C | -0.55176 | -0.49569 | -3.65256 |
| C | 1.73900  | -0.25038 | 1.67587  |
| C | -1.80225 | -0.89144 | 0.71207  |
| C | 2.32489  | 1.62037  | -2.39320 |
| C | -1.73899 | 0.25037  | 1.67587  |
| C | -2.32489 | -1.62038 | -2.39319 |
| C | 0.60240  | -0.44671 | 2.49147  |
| C | 1.71389  | -2.36207 | 3.51209  |
| H | 1.68147  | -3.18925 | 4.21659  |
| C | -1.32086 | -0.66008 | -2.49017 |
| H | -1.13154 | -0.00671 | -1.64624 |
| C | -2.84270 | 2.18521  | 2.69552  |
| C | 0.55175  | 0.49568  | -3.65257 |
| C | 2.84271  | -2.18521 | 2.69551  |
| C | -0.84323 | -1.30325 | -4.75972 |
| H | -0.25557 | -1.21322 | -5.66999 |
| C | 2.60783  | 2.43367  | -3.51118 |
| C | 1.32085  | 0.66008  | -2.49017 |
| H | 1.13154  | 0.00671  | -1.64625 |
| C | -0.60239 | 0.44670  | 2.49147  |
| C | 0.62135  | -1.50785 | 3.40610  |
| H | -0.25162 | -1.67438 | 4.03164  |
| C | 0.84322  | 1.30325  | -4.75972 |
| H | 0.25555  | 1.21322  | -5.66998 |
| C | 1.80226  | 0.89143  | 0.71207  |
| C | -2.60784 | -2.43367 | -3.51117 |
| C | -3.06580 | -1.83449 | -1.08488 |
| H | -4.14748 | -1.86082 | -1.24233 |
| H | -2.75247 | -2.78152 | -0.63127 |
| C | 3.06580  | 1.83448  | -1.08489 |
| H | 4.14748  | 1.86081  | -1.24234 |
| H | 2.75248  | 2.78151  | -0.63128 |

|   |          |          |          |
|---|----------|----------|----------|
| C | -1.71388 | 2.36206  | 3.51209  |
| H | -1.68146 | 3.18924  | 4.21660  |
| C | -0.62134 | 1.50784  | 3.40610  |
| H | 0.25163  | 1.67438  | 4.03164  |
| C | 1.86025  | 2.25362  | -4.68392 |
| H | 2.07557  | 2.88316  | -5.54422 |
| C | -1.86026 | -2.25361 | -4.68392 |
| H | -2.07559 | -2.88316 | -5.54422 |
| C | -3.65671 | -3.50157 | -3.46680 |
| C | -5.04564 | -3.18662 | -3.63654 |
| C | -3.28053 | -4.82384 | -3.27912 |
| C | -5.51805 | -1.86446 | -3.85963 |
| C | -6.00481 | -4.24667 | -3.59083 |
| C | -4.23184 | -5.86271 | -3.23891 |
| H | -2.22661 | -5.05985 | -3.15504 |
| C | -6.86626 | -1.60767 | -4.01477 |
| H | -4.79833 | -1.05221 | -3.91256 |
| C | -7.38456 | -3.95866 | -3.75408 |
| C | -5.57731 | -5.58321 | -3.38840 |
| H | -3.92826 | -6.89464 | -3.08814 |
| C | -7.80614 | -2.65660 | -3.96049 |
| H | -7.20759 | -0.58979 | -4.18437 |
| H | -8.86891 | -2.46898 | -4.08164 |
| C | 3.65670  | 3.50157  | -3.46681 |
| C | 5.04563  | 3.18662  | -3.63654 |
| C | 3.28051  | 4.82385  | -3.27915 |
| C | 5.51804  | 1.86447  | -3.85961 |
| C | 6.00479  | 4.24668  | -3.59084 |
| C | 4.23182  | 5.86271  | -3.23894 |
| H | 2.22659  | 5.05985  | -3.15508 |
| C | 6.86625  | 1.60767  | -4.01474 |
| H | 4.79833  | 1.05221  | -3.91254 |
| C | 7.38454  | 3.95866  | -3.75408 |
| C | 5.57729  | 5.58321  | -3.38842 |
| H | 3.92818  | 6.89460  | -3.08799 |
| C | 7.80613  | 2.65661  | -3.96047 |
| H | 7.20758  | 0.58979  | -4.18433 |
| H | 8.86890  | 2.46899  | -4.08161 |
| C | -6.56356 | -6.69155 | -3.33894 |
| C | -8.39878 | -5.04563 | -3.70794 |
| C | 6.56354  | 6.69156  | -3.33896 |
| C | 8.39876  | 5.04564  | -3.70794 |
| O | 6.24380  | 7.85657  | -3.16680 |
| O | -6.24383 | -7.85656 | -3.16676 |
| O | -9.59200 | -4.82895 | -3.84150 |
| O | 9.59199  | 4.82897  | -3.84148 |
| N | 7.91326  | 6.34809  | -3.50096 |
| N | -7.91328 | -6.34808 | -3.50095 |
| C | -8.87407 | -7.45585 | -3.44815 |
| H | -9.87019 | -7.03958 | -3.58633 |
| H | -8.64731 | -8.18113 | -4.23467 |
| H | -8.79976 | -7.96514 | -2.48322 |
| C | 8.87404  | 7.45586  | -3.44817 |

|   |          |          |          |
|---|----------|----------|----------|
| H | 9.87017  | 7.03959  | -3.58632 |
| H | 8.64730  | 8.18112  | -4.23471 |
| H | 8.79972  | 7.96517  | -2.48325 |
| C | 4.00217  | -3.11795 | 2.74460  |
| C | 4.70592  | -3.40160 | 3.96453  |
| C | 4.41049  | -3.73814 | 1.56998  |
| C | 4.42101  | -2.76238 | 5.20236  |
| C | 5.77881  | -4.34968 | 3.93454  |
| C | 5.47387  | -4.65840 | 1.54950  |
| H | 3.87120  | -3.52800 | 0.65000  |
| C | 5.12855  | -3.07190 | 6.34734  |
| H | 3.64119  | -2.00850 | 5.24088  |
| C | 6.48756  | -4.65644 | 5.12556  |
| C | 6.14635  | -4.97329 | 2.71562  |
| H | 5.77467  | -5.14685 | 0.62724  |
| C | 6.16040  | -4.03003 | 6.31513  |
| H | 4.89352  | -2.56718 | 7.28086  |
| C | 7.59708  | -5.64721 | 5.11938  |
| C | 7.25375  | -5.96002 | 2.67247  |
| H | 6.72299  | -4.28596 | 7.20802  |
| O | 8.21454  | -5.93895 | 6.13060  |
| N | 7.90474  | -6.23750 | 3.88238  |
| O | 7.60337  | -6.51977 | 1.64569  |
| C | 8.99356  | -7.21913 | 3.82277  |
| H | 9.39383  | -7.33388 | 4.82839  |
| H | 8.61179  | -8.17310 | 3.44847  |
| H | 9.77067  | -6.87024 | 3.13681  |
| C | -4.00216 | 3.11794  | 2.74461  |
| C | -4.70590 | 3.40159  | 3.96454  |
| C | -4.41048 | 3.73814  | 1.56999  |
| C | -4.42099 | 2.76238  | 5.20237  |
| C | -5.77879 | 4.34967  | 3.93456  |
| C | -5.47386 | 4.65840  | 1.54952  |
| H | -3.87119 | 3.52799  | 0.65001  |
| C | -5.12853 | 3.07189  | 6.34736  |
| H | -3.64118 | 2.00850  | 5.24089  |
| C | -6.48754 | 4.65644  | 5.12558  |
| C | -6.14633 | 4.97329  | 2.71564  |
| H | -5.77466 | 5.14685  | 0.62726  |
| C | -6.16038 | 4.03003  | 6.31515  |
| H | -4.89350 | 2.56718  | 7.28088  |
| C | -7.59706 | 5.64720  | 5.11940  |
| C | -7.25374 | 5.96002  | 2.67249  |
| H | -6.72297 | 4.28595  | 7.20804  |
| O | -8.21451 | 5.93895  | 6.13062  |
| N | -7.90472 | 6.23749  | 3.88240  |
| O | -7.60336 | 6.51977  | 1.64571  |
| C | -8.99354 | 7.21914  | 3.82280  |
| H | -9.39381 | 7.33388  | 4.82841  |
| H | -8.61177 | 8.17310  | 3.44850  |
| H | -9.77066 | 6.87024  | 3.13684  |

134

C<sub>Br<sub>2</sub>BY<sub>2</sub></sub> Energy: -5433859.7305435

|   |          |          |          |
|---|----------|----------|----------|
| O | 2.60718  | 1.63600  | 1.35218  |
| O | 2.01021  | 2.49269  | -0.65205 |
| O | -2.60718 | 1.63601  | -1.35218 |
| O | -2.01021 | 2.49269  | 0.65205  |
| C | 1.32743  | 3.56305  | 2.74165  |
| H | 2.06518  | 2.92352  | 3.21011  |
| C | -1.32744 | 3.56306  | -2.74165 |
| H | -2.06519 | 2.92353  | -3.21011 |
| C | 0.74116  | -1.87569 | 0.01394  |
| C | -1.11011 | 3.46698  | -1.35750 |
| C | 1.93284  | 2.50871  | 0.55598  |
| C | -2.81460 | -0.60654 | -0.34083 |
| C | 1.11011  | 3.46698  | 1.35751  |
| C | 2.81460  | -0.60654 | 0.34082  |
| C | -0.14223 | 4.28774  | -0.73664 |
| C | 0.33789  | 5.30953  | -2.90128 |
| H | 0.89508  | 6.02598  | -3.49676 |
| C | 1.42526  | -0.69926 | 0.35887  |
| H | 0.84753  | 0.15855  | 0.68135  |
| C | 0.60818  | 4.47832  | 3.49921  |
| C | -0.74116 | -1.87569 | -0.01396 |
| C | -0.60818 | 4.47833  | -3.49920 |
| C | 1.50440  | -3.00699 | -0.30593 |
| H | 1.01446  | -3.93279 | -0.59666 |
| C | -3.57631 | -1.74923 | -0.00731 |
| C | -1.42526 | -0.69926 | -0.35888 |
| H | -0.84753 | 0.15855  | -0.68135 |
| C | 0.14223  | 4.28774  | 0.73665  |
| C | 0.55963  | 5.20360  | -1.53113 |
| H | 1.30575  | 5.83979  | -1.06261 |
| C | -1.50440 | -3.00699 | 0.30591  |
| H | -1.01446 | -3.93280 | 0.59664  |
| C | -1.93284 | 2.50871  | -0.55598 |
| C | 3.57631  | -1.74923 | 0.00730  |
| C | 3.49183  | 0.70706  | 0.69556  |
| H | 4.31102  | 0.54531  | 1.40236  |
| H | 3.89030  | 1.19098  | -0.20118 |
| C | -3.49183 | 0.70706  | -0.69556 |
| H | -4.31102 | 0.54532  | -1.40236 |
| H | -3.89030 | 1.19098  | 0.20118  |
| C | -0.33789 | 5.30952  | 2.90129  |
| H | -0.89508 | 6.02597  | 3.49677  |
| C | -0.55963 | 5.20359  | 1.53114  |
| H | -1.30575 | 5.83978  | 1.06262  |
| C | -2.89511 | -2.93952 | 0.29403  |
| H | -3.47680 | -3.81931 | 0.55959  |
| C | 2.89511  | -2.93952 | -0.29405 |
| H | 3.47680  | -3.81931 | -0.55961 |
| C | -5.06770 | -1.74642 | 0.02017  |
| C | -5.79043 | -2.65818 | -0.76753 |
| C | -5.79139 | -0.87539 | 0.85154  |

|   |           |          |          |
|---|-----------|----------|----------|
| C | -7.18431  | -2.69165 | -0.73459 |
| H | -5.25038  | -3.33899 | -1.42132 |
| C | -7.18536  | -0.90819 | 0.88745  |
| H | -5.25841  | -0.18474 | 1.50040  |
| C | -7.89887  | -1.81493 | 0.09245  |
| H | -7.72528  | -3.40044 | -1.35715 |
| H | -7.72664  | -0.23110 | 1.54405  |
| C | -9.39320  | -1.84909 | 0.12870  |
| C | -10.04356 | -2.67724 | 1.05963  |
| C | -10.12466 | -1.05265 | -0.76958 |
| N | -11.44143 | -2.72184 | 1.10782  |
| C | -9.54261  | -3.57242 | 2.06541  |
| N | -11.52363 | -1.07298 | -0.75212 |
| C | -9.71369  | -0.13596 | -1.79609 |
| B | -12.41539 | -1.91950 | 0.19949  |
| C | -11.81636 | -3.58160 | 2.07343  |
| C | -10.66275 | -4.12131 | 2.68108  |
| C | -8.12480  | -3.89868 | 2.43262  |
| C | -11.98311 | -0.23217 | -1.69782 |
| C | -10.88564 | 0.36015  | -2.35798 |
| C | -8.33113  | 0.25620  | -2.22792 |
| F | -13.22037 | -1.08126 | 0.97801  |
| F | -13.21510 | -2.79571 | -0.54186 |
| C | -13.25040 | -3.85928 | 2.38325  |
| H | -10.66250 | -4.84167 | 3.49033  |
| H | -7.56449  | -4.31418 | 1.58756  |
| H | -7.57217  | -3.01536 | 2.77202  |
| H | -8.11339  | -4.63583 | 3.24187  |
| C | -13.44150 | -0.02171 | -1.93954 |
| H | -10.95669 | 1.07943  | -3.16508 |
| H | -7.75429  | 0.70020  | -1.40865 |
| H | -7.75355  | -0.60113 | -2.59186 |
| H | -8.39150  | 0.99125  | -3.03691 |
| H | -13.76437 | -2.93249 | 2.66196  |
| H | -13.76236 | -4.24498 | 1.49448  |
| H | -13.33677 | -4.58354 | 3.19739  |
| H | -13.92465 | -0.97187 | -2.19356 |
| H | -13.92828 | 0.34204  | -1.02766 |
| H | -13.59959 | 0.69594  | -2.74876 |
| C | 5.06770   | -1.74642 | -0.02018 |
| C | 5.79043   | -2.65818 | 0.76752  |
| C | 5.79139   | -0.87539 | -0.85155 |
| C | 7.18431   | -2.69165 | 0.73458  |
| H | 5.25037   | -3.33900 | 1.42131  |
| C | 7.18536   | -0.90819 | -0.88746 |
| H | 5.25841   | -0.18473 | -1.50040 |
| C | 7.89887   | -1.81493 | -0.09246 |
| H | 7.72528   | -3.40045 | 1.35714  |
| H | 7.72664   | -0.23109 | -1.54405 |
| C | 9.39320   | -1.84909 | -0.12871 |
| C | 10.04357  | -2.67724 | -1.05963 |
| C | 10.12466  | -1.05266 | 0.76958  |
| N | 11.44143  | -2.72183 | -1.10782 |

|    |          |          |          |
|----|----------|----------|----------|
| C  | 9.54262  | -3.57240 | -2.06543 |
| N  | 11.52363 | -1.07298 | 0.75213  |
| C  | 9.71368  | -0.13597 | 1.79610  |
| B  | 12.41539 | -1.91950 | -0.19949 |
| C  | 11.81636 | -3.58158 | -2.07343 |
| C  | 10.66276 | -4.12130 | -2.68109 |
| C  | 8.12481  | -3.89867 | -2.43264 |
| C  | 11.98311 | -0.23218 | 1.69784  |
| C  | 10.88564 | 0.36014  | 2.35799  |
| C  | 8.33113  | 0.25618  | 2.22793  |
| F  | 13.22037 | -1.08126 | -0.97799 |
| F  | 13.21510 | -2.79571 | 0.54186  |
| C  | 13.25041 | -3.85927 | -2.38326 |
| H  | 10.66251 | -4.84165 | -3.49035 |
| H  | 7.56450  | -4.31417 | -1.58758 |
| H  | 7.57217  | -3.01534 | -2.77203 |
| H  | 8.11340  | -4.63581 | -3.24189 |
| C  | 13.44150 | -0.02172 | 1.93956  |
| H  | 10.95668 | 1.07941  | 3.16509  |
| H  | 7.75429  | 0.70020  | 1.40865  |
| H  | 7.75355  | -0.60114 | 2.59186  |
| H  | 8.39149  | 0.99124  | 3.03692  |
| H  | 13.76438 | -2.93248 | -2.66196 |
| H  | 13.76236 | -4.24497 | -1.49448 |
| H  | 13.33678 | -4.58352 | -3.19740 |
| H  | 13.92465 | -0.97188 | 2.19358  |
| H  | 13.92828 | 0.34203  | 1.02768  |
| H  | 13.59958 | 0.69593  | 2.74878  |
| Br | 0.92479  | 4.60503  | 5.36895  |
| Br | -0.92479 | 4.60505  | -5.36894 |

216

**C<sub>BY4</sub>** Energy: -3547998.6465443

|   |          |          |          |
|---|----------|----------|----------|
| O | -2.88978 | -0.51174 | 0.15369  |
| O | -1.19672 | -1.73763 | 1.01218  |
| O | 2.88978  | 0.51174  | 0.15369  |
| O | 1.19672  | 1.73763  | 1.01217  |
| C | -2.71620 | 1.37324  | 2.08685  |
| H | -3.58990 | 1.27157  | 1.45304  |
| C | 2.71620  | -1.37324 | 2.08685  |
| H | 3.58991  | -1.27157 | 1.45303  |
| C | -0.59693 | -0.43955 | -3.35783 |
| C | 1.70542  | -0.40612 | 1.98612  |
| C | -1.86950 | -0.73093 | 1.03018  |
| C | 2.44036  | 1.44274  | -2.08747 |
| C | -1.70542 | 0.40612  | 1.98612  |
| C | -2.44036 | -1.44275 | -2.08747 |
| C | 0.56208  | -0.49638 | 2.81205  |
| C | 1.51179  | -2.49756 | 3.83011  |
| H | 1.40965  | -3.31585 | 4.53863  |
| C | -1.34816 | -0.58381 | -2.18063 |
| H | -1.08425 | 0.02113  | -1.32160 |
| C | -2.64278 | 2.43065  | 3.00069  |

|   |          |          |          |   |           |          |          |
|---|----------|----------|----------|---|-----------|----------|----------|
| C | 0.59693  | 0.43955  | -3.35783 | F | 10.81681  | 7.61320  | -4.28772 |
| C | 2.64279  | -2.43066 | 3.00069  | C | 9.06086   | 9.95700  | -5.33925 |
| C | -1.01016 | -1.15573 | -4.48976 | H | 6.33063   | 9.26338  | -6.31518 |
| H | -0.44589 | -1.08737 | -5.41638 | H | 5.03270   | 5.86697  | -5.79583 |
| C | 2.84426  | 2.16852  | -3.23098 | H | 4.32204   | 6.80519  | -4.49017 |
| C | 1.34815  | 0.58380  | -2.18064 | H | 4.45941   | 7.51475  | -6.10802 |
| H | 1.08425  | -0.02114 | -1.32160 | C | 11.85684  | 6.63021  | -1.52286 |
| C | -0.56208 | 0.49638  | 2.81205  | H | 10.63560  | 4.14088  | -0.42722 |
| C | 0.49897  | -1.54977 | 3.73319  | H | 7.02438   | 3.58627  | -0.79448 |
| H | -0.37777 | -1.63465 | 4.36985  | H | 7.73839   | 2.65316  | -2.10325 |
| C | 1.01016  | 1.15573  | -4.48976 | H | 8.52244   | 2.68103  | -0.51411 |
| H | 0.44589  | 1.08737  | -5.41638 | H | 9.30261   | 10.48747 | -4.41138 |
| C | 1.86950  | 0.73093  | 1.03018  | H | 10.00650  | 9.56473  | -5.72998 |
| C | -2.84426 | -2.16853 | -3.23098 | H | 8.63123   | 10.65826 | -6.05929 |
| C | -3.18975 | -1.57388 | -0.77155 | H | 12.39143  | 6.72620  | -2.47457 |
| H | -4.27069 | -1.51819 | -0.93142 | H | 11.68935  | 7.64868  | -1.15481 |
| H | -2.95401 | -2.52610 | -0.28684 | H | 12.47740  | 6.08181  | -0.80941 |
| C | 3.18975  | 1.57388  | -0.77155 | C | -4.01174  | -3.09682 | -3.22918 |
| H | 4.27069  | 1.51819  | -0.93142 | C | -5.06048  | -2.91448 | -4.14637 |
| H | 2.95401  | 2.52610  | -0.28685 | C | -4.08503  | -4.19363 | -2.35437 |
| C | -1.51178 | 2.49756  | 3.83011  | C | -6.14687  | -3.78830 | -4.18166 |
| H | -1.40964 | 3.31585  | 4.53862  | H | -5.02632  | -2.06961 | -4.83022 |
| C | -0.49897 | 1.54977  | 3.73319  | C | -5.16969  | -5.06987 | -2.38892 |
| H | 0.37777  | 1.63464  | 4.36984  | H | -3.27076  | -4.38214 | -1.65909 |
| C | 2.12157  | 1.99170  | -4.42201 | C | -6.21533  | -4.87617 | -3.30126 |
| H | 2.42308  | 2.55473  | -5.30235 | H | -6.95159  | -3.62560 | -4.89481 |
| C | -2.12158 | -1.99170 | -4.42200 | H | -5.20332  | -5.91774 | -1.70880 |
| H | -2.42309 | -2.55474 | -5.30235 | C | -7.37920  | -5.81407 | -3.33703 |
| C | 4.01173  | 3.09681  | -3.22918 | C | -7.32587  | -6.95120 | -4.16117 |
| C | 5.06047  | 2.91448  | -4.14637 | C | -8.50921  | -5.54360 | -2.54554 |
| C | 4.08502  | 4.19363  | -2.35437 | N | -8.40554  | -7.84038 | -4.20647 |
| C | 6.14687  | 3.78830  | -4.18166 | C | -6.31328  | -7.44728 | -5.05154 |
| H | 5.02632  | 2.06961  | -4.83021 | N | -9.60847  | -6.40896 | -2.56657 |
| C | 5.16968  | 5.06987  | -2.38892 | C | -8.81138  | -4.47541 | -1.63428 |
| H | 3.27075  | 4.38214  | -1.65909 | B | -9.73352  | -7.71037 | -3.40823 |
| C | 6.21532  | 4.87617  | -3.30127 | C | -8.11257  | -8.83746 | -5.06205 |
| H | 6.95159  | 3.62559  | -4.89481 | C | -6.82557  | -8.61919 | -5.59834 |
| H | 5.20331  | 5.91774  | -1.70881 | C | -4.96391  | -6.87658 | -5.37548 |
| C | 7.37919  | 5.81407  | -3.33703 | C | -10.55186 | -5.93507 | -1.73118 |
| C | 7.32586  | 6.95120  | -4.16118 | C | -10.08511 | -4.74094 | -1.14186 |
| C | 8.50920  | 5.54360  | -2.54554 | C | -7.97885  | -3.28950 | -1.24402 |
| N | 8.40553  | 7.84038  | -4.20647 | F | -9.89955  | -8.81469 | -2.56591 |
| C | 6.31327  | 7.44728  | -5.05155 | F | -10.81681 | -7.61319 | -4.28773 |
| N | 9.60846  | 6.40896  | -2.56657 | C | -9.06087  | -9.95700 | -5.33924 |
| C | 8.81137  | 4.47542  | -1.63427 | H | -6.33063  | -9.26339 | -6.31517 |
| B | 9.73351  | 7.71037  | -3.40823 | H | -5.03270  | -5.86697 | -5.79582 |
| C | 8.11256  | 8.83745  | -5.06206 | H | -4.32204  | -6.80519 | -4.49016 |
| C | 6.82556  | 8.61918  | -5.59835 | H | -4.45941  | -7.51476 | -6.10801 |
| C | 4.96390  | 6.87657  | -5.37549 | C | -11.85685 | -6.63020 | -1.52287 |
| C | 10.55185 | 5.93508  | -1.73118 | H | -10.63561 | -4.14087 | -0.42723 |
| C | 10.08510 | 4.74095  | -1.14185 | H | -7.02439  | -3.58627 | -0.79448 |
| C | 7.97884  | 3.28951  | -1.24401 | H | -7.73840  | -2.65315 | -2.10326 |
| F | 9.89954  | 8.81469  | -2.56591 | H | -8.52245  | -2.68103 | -0.51412 |





|   |           |          |          |   |           |          |          |
|---|-----------|----------|----------|---|-----------|----------|----------|
| C | 2.83474   | -0.05727 | -1.79285 | C | -11.55434 | -3.24043 | -4.76116 |
| C | -0.21588  | 0.72052  | 3.10293  | C | -10.34613 | -3.73538 | -5.29677 |
| C | 0.03746   | 2.92374  | 4.11620  | C | -7.84512  | -3.23727 | -5.07580 |
| H | 0.55503   | 3.56882  | 4.82160  | C | -12.09358 | 0.52000  | -1.43890 |
| C | 1.45402   | -0.21329 | -1.88540 | C | -11.06671 | 1.28873  | -0.85085 |
| H | 0.91129   | -0.58848 | -1.02618 | C | -8.51169  | 1.40879  | -0.95256 |
| C | 0.96493   | -3.45231 | 3.29470  | F | -13.06044 | -2.27121 | -2.26752 |
| C | -0.73879  | -0.06243 | -3.06267 | F | -13.20413 | -0.77085 | -3.99318 |
| C | -0.96510  | 3.45688  | 3.28970  | C | -12.95075 | -3.69133 | -5.03724 |
| C | 1.46694   | 0.44878  | -4.19500 | H | -10.26592 | -4.54523 | -6.01197 |
| H | 0.95095   | 0.68662  | -5.12174 | H | -7.36993  | -2.34323 | -5.49485 |
| C | -3.55986  | -0.35057 | -2.93649 | H | -7.26260  | -3.51725 | -4.19081 |
| C | -1.45394  | 0.21047  | -1.88578 | H | -7.75393  | -4.04469 | -5.80938 |
| H | -0.91126  | 0.58692  | -1.02709 | C | -13.56887 | 0.61928  | -1.23098 |
| C | 0.21570   | -0.71620 | 3.10397  | H | -11.21739 | 2.09036  | -0.13775 |
| C | 0.39962   | 1.58437  | 4.01814  | H | -7.85687  | 0.65275  | -0.50445 |
| H | 1.19466   | 1.19670  | 4.64961  | H | -7.97266  | 1.82370  | -1.81185 |
| C | -1.46674  | -0.45499 | -4.19441 | H | -8.65193  | 2.21171  | -0.22174 |
| H | -0.95071  | -0.69419 | -5.12077 | H | -13.43621 | -4.01172 | -4.10855 |
| C | -1.97673  | 0.36030  | 1.32392  | H | -13.54673 | -2.86001 | -5.43031 |
| C | 3.55998   | 0.34622  | -2.93681 | H | -12.95602 | -4.51566 | -5.75505 |
| C | 3.54245   | -0.33875 | -0.47759 | H | -14.07334 | 0.81864  | -2.18310 |
| H | 4.43063   | -0.95728 | -0.63689 | H | -13.96455 | -0.33348 | -0.86156 |
| H | 3.84530   | 0.59481  | 0.00597  | H | -13.80629 | 1.41381  | -0.51881 |
| C | -3.54246  | 0.33802  | -0.47828 | C | 5.04140   | 0.52000  | -2.93534 |
| H | -4.43059  | 0.95638  | -0.63854 | C | 5.83648   | -0.19058 | -3.85032 |
| H | -3.84540  | -0.59482 | 0.00661  | C | 5.68163   | 1.41575  | -2.06279 |
| C | -0.03769  | -2.91797 | 4.12035  | C | 7.22037   | -0.02138 | -3.88527 |
| H | -0.55534  | -3.56205 | 4.82663  | H | 5.36218   | -0.89229 | -4.53241 |
| C | -0.39984  | -1.57873 | 4.02040  | C | 7.06534   | 1.58796  | -2.09714 |
| H | -1.19491  | -1.19017 | 4.65127  | H | 5.08894   | 2.00773  | -1.36972 |
| C | -2.85175  | -0.58123 | -4.12700 | C | 7.85194   | 0.86910  | -3.00695 |
| H | -3.40410  | -0.90175 | -5.00736 | H | 7.81859   | -0.58612 | -4.59646 |
| C | 2.85194   | 0.57512  | -4.12770 | H | 7.54083   | 2.29254  | -1.41890 |
| H | 3.40434   | 0.89435  | -5.00850 | C | 9.33553   | 1.05141  | -3.04229 |
| C | -5.04127  | -0.52434 | -2.93484 | C | 9.89053   | 2.04607  | -3.86557 |
| C | -5.83631  | 0.18493  | -3.85087 | C | 10.15225  | 0.22445  | -2.25141 |
| C | -5.68155  | -1.41883 | -2.06103 | N | 11.27688  | 2.23145  | -3.91038 |
| C | -7.22020  | 0.01569  | -3.88565 | C | 9.29256   | 3.00230  | -4.75565 |
| H | -5.36197  | 0.88566  | -4.53395 | N | 11.54270  | 0.37888  | -2.27245 |
| C | -7.06526  | -1.59107 | -2.09520 | C | 9.84486   | -0.84264 | -1.34048 |
| H | -5.08890  | -2.00982 | -1.36708 | B | 12.33607  | 1.41879  | -3.11324 |
| C | -7.85181  | -0.87352 | -3.00607 | C | 11.55454  | 3.23347  | -4.76531 |
| H | -7.81838  | 0.57941  | -4.59767 | C | 10.34635  | 3.72764  | -5.30168 |
| H | -7.54078  | -2.29467 | -1.41596 | C | 7.84534   | 3.22986  | -5.08010 |
| C | -9.33541  | -1.05588 | -3.04121 | C | 12.09364  | -0.52212 | -1.43755 |
| C | -9.89037  | -2.05173 | -3.86308 | C | 11.06674  | -1.28999 | -0.84842 |
| C | -10.15215 | -0.22776 | -2.25158 | C | 8.51173   | -1.41020 | -0.95007 |
| N | -11.27671 | -2.23717 | -3.90768 | F | 13.06055  | 2.26787  | -2.27022 |
| C | -9.29236  | -3.00925 | -4.75174 | F | 13.20428  | 0.76499  | -3.99368 |
| N | -11.54261 | -0.38222 | -2.27246 | C | 12.95096  | 3.68396  | -5.04198 |
| C | -9.84481  | 0.84066  | -1.34220 | H | 10.26618  | 4.53645  | -6.01806 |
| B | -12.33593 | -1.42336 | -3.11176 | H | 7.37016   | 2.33521  | -5.49787 |

|   |          |          |          |   |          |           |         |
|---|----------|----------|----------|---|----------|-----------|---------|
| H | 7.26278  | 3.51111  | -4.19554 | C | 2.86315  | -11.17548 | 4.38672 |
| H | 7.75417  | 4.03621  | -5.81484 | H | 1.98240  | -11.70734 | 4.01616 |
| C | 13.56892 | -0.62109 | -1.22942 | H | 3.68967  | -11.36166 | 3.69506 |
| H | 11.21739 | -2.09057 | -0.13415 | H | 3.12024  | -11.51085 | 5.38976 |
| H | 7.85690  | -0.65352 | -0.50308 | C | -2.87473 | 11.18120  | 4.43261 |
| H | 7.97273  | -1.82634 | -1.80879 | H | -3.90036 | 11.35203  | 4.77181 |
| H | 8.65194  | -2.21207 | -0.21810 | H | -2.19825 | 11.69750  | 5.11944 |
| H | 13.43639 | 4.00567  | -4.11374 | H | -2.74184 | 11.54642  | 3.41592 |
| H | 13.54695 | 2.85208  | -5.43385 |   |          |           |         |
| H | 12.95626 | 4.50726  | -5.76098 |   |          |           |         |
| H | 14.07343 | -0.82184 | -2.18122 |   |          |           |         |
| H | 13.96458 | 0.33221  | -0.86138 |   |          |           |         |
| H | 13.80631 | -1.41457 | -0.51608 |   |          |           |         |
| C | 1.33194  | -4.89458 | 3.33686  |   |          |           |         |
| C | 1.73089  | -5.54819 | 4.55250  |   |          |           |         |
| C | 1.27968  | -5.63175 | 2.15998  |   |          |           |         |
| C | 1.89430  | -4.87003 | 5.79161  |   |          |           |         |
| C | 2.01873  | -6.95059 | 4.51643  |   |          |           |         |
| C | 1.57668  | -7.00624 | 2.13349  |   |          |           |         |
| H | 0.97035  | -5.13678 | 1.24311  |   |          |           |         |
| C | 2.28036  | -5.54616 | 6.93234  |   |          |           |         |
| H | 1.72416  | -3.79899 | 5.83443  |   |          |           |         |
| C | 2.40771  | -7.62540 | 5.70317  |   |          |           |         |
| C | 1.93106  | -7.66597 | 3.29562  |   |          |           |         |
| H | 1.51885  | -7.57415 | 1.20949  |   |          |           |         |
| C | 2.52927  | -6.93191 | 6.89433  |   |          |           |         |
| H | 2.40097  | -5.00442 | 7.86691  |   |          |           |         |
| H | 2.83023  | -7.47740 | 7.78378  |   |          |           |         |
| C | -1.33211 | 4.89917  | 3.32975  |   |          |           |         |
| C | -1.73063 | 5.55504  | 4.54411  |   |          |           |         |
| C | -1.28041 | 5.63469  | 2.15187  |   |          |           |         |
| C | -1.89365 | 4.87920  | 5.78473  |   |          |           |         |
| C | -2.01849 | 6.95736  | 4.50556  |   |          |           |         |
| C | -1.57732 | 7.00906  | 2.12324  |   |          |           |         |
| H | -0.97145 | 5.13853  | 1.23551  |   |          |           |         |
| C | -2.27930 | 5.55692  | 6.92473  |   |          |           |         |
| H | -1.72347 | 3.80824  | 5.82922  |   |          |           |         |
| C | -2.40687 | 7.63276  | 5.69173  |   |          |           |         |
| C | -1.93149 | 7.67212  | 3.28392  |   |          |           |         |
| H | -1.51949 | 7.57459  | 1.19792  |   |          |           |         |
| C | -2.52832 | 6.94267  | 6.88451  |   |          |           |         |
| H | -2.39944 | 5.01640  | 7.86008  |   |          |           |         |
| H | -2.82909 | 7.49053  | 7.77270  |   |          |           |         |
| C | -2.22178 | 9.12793  | 3.22434  |   |          |           |         |
| O | -2.15367 | 9.76445  | 2.18532  |   |          |           |         |
| N | -2.58254 | 9.74343  | 4.43452  |   |          |           |         |
| C | 2.69947  | -9.08392 | 5.69073  |   |          |           |         |
| O | 3.02397  | -9.69126 | 6.69818  |   |          |           |         |
| N | 2.58334  | -9.73674 | 4.45244  |   |          |           |         |
| C | -2.69680 | 9.08956  | 5.66903  |   |          |           |         |
| O | -3.02251 | 9.71526  | 6.66498  |   |          |           |         |
| C | 2.22268  | -9.11998 | 3.24636  |   |          |           |         |
| O | 2.15966  | -9.77463 | 2.21813  |   |          |           |         |

## References

- [1] M. J. Frisch, G. W. Trucks, H. B. Schlegel, G. E. Scuseria, M. A. Robb, J. R. Cheeseman, G. Scalmani, V. Barone, G. A. Petersson, H. Nakatsuji, X. Li, M. Caricato, A. Marenich, J. Bloino, B. G. Janesko, R. Gomperts, B. Mennucci, H. P. Hratchian, J. V. Ortiz, A. F. Izmaylov, J. L. Sonnenberg, D. Williams-Young, F. Ding, F. Lipparini, F. Egidi, J. Goings, B. Peng, A. Petrone, T. Henderson, D. Ranasinghe, V. G. Zakrzewski, J. Gao, N. Rega, G. Zheng, W. Liang, M. Hada, M. Ehara, K. Toyota, R. Fukuda, J. Hasegawa, M. Ishida, T. Nakajima, Y. Honda, O. Kitao, H. Nakai, T. Vreven, K. Throssell, J. A. Montgomery, Jr., J. E. Peralta, F. Ogliaro, M. Bearpark, J. J. Heyd, E. Brothers, K. N. Kudin, V. N. Staroverov, T. Keith, R. Kobayashi, J. Normand, K. Raghavachari, A. Rendell, J. C. Burant, S. S. Iyengar, J. Tomasi, M. Cossi, J. M. Millam, M. Klene, C. Adamo, R. Cammi, J. W. Ochterski, R. L. Martin, K. Morokuma, O. Farkas, J. B. Foresman, and D. J. Fox, **n.d.**
- [2] G. Pescitelli, T. Bruhn, *Chirality* **2016**, *28*, 466–474.
- [3] T. Bruhn, A. Schaumlöffel, Y. Hemberger, G. Bringmann, *Chirality* **2013**, *25*, 243–249.

# NMR, IR and HR-ESI-MS spectra

$^1\text{H-NMR}$  spectrum of **5** in  $\text{CD}_2\text{Cl}_2$

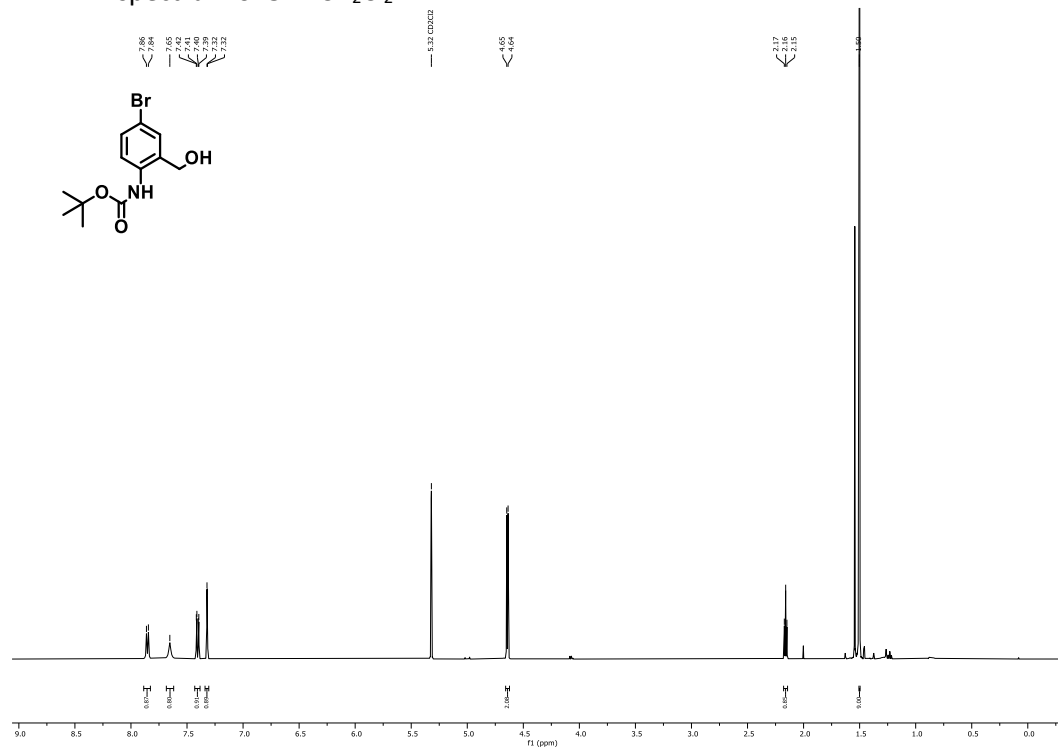

$^{13}\text{C-NMR}$  spectrum of **5** in  $\text{CD}_2\text{Cl}_2$

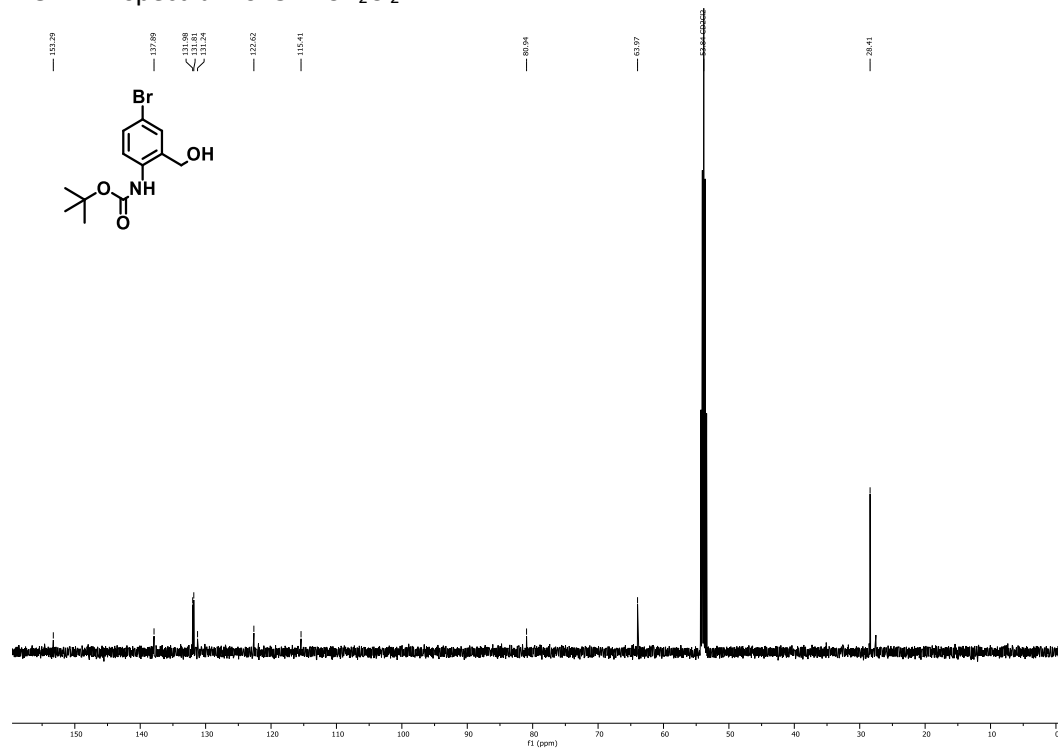

# HR-ESI-MS spectrum of 5

## High Resolution Mass Spectrometry Report

Sample Name **KRO-338**  
Comment

Instrument **maXis 4G**  
Method **ms\_nocolumn\_mid\_pos.m**

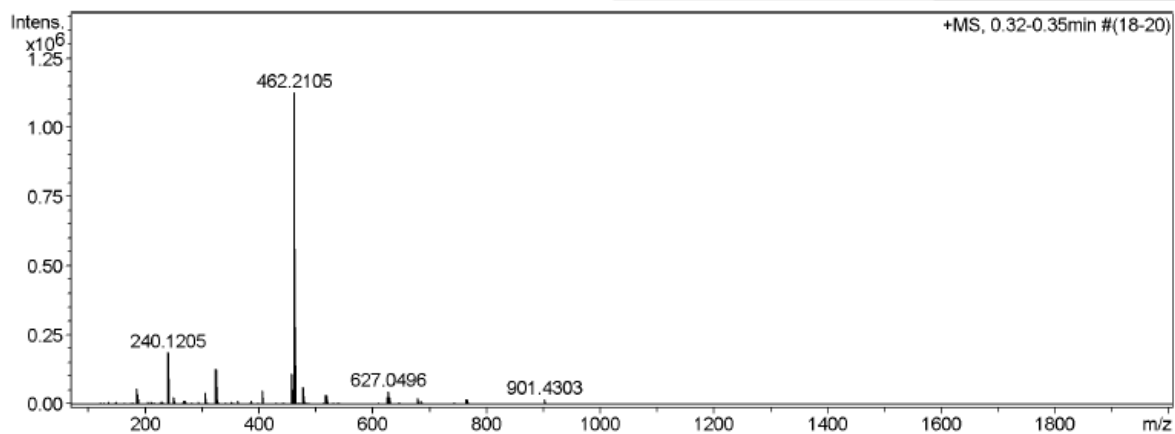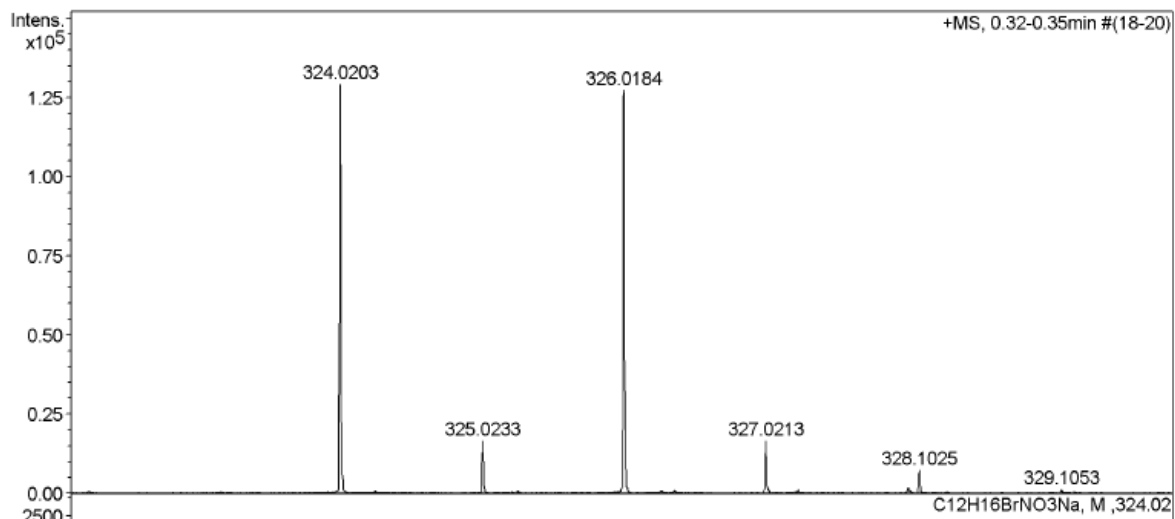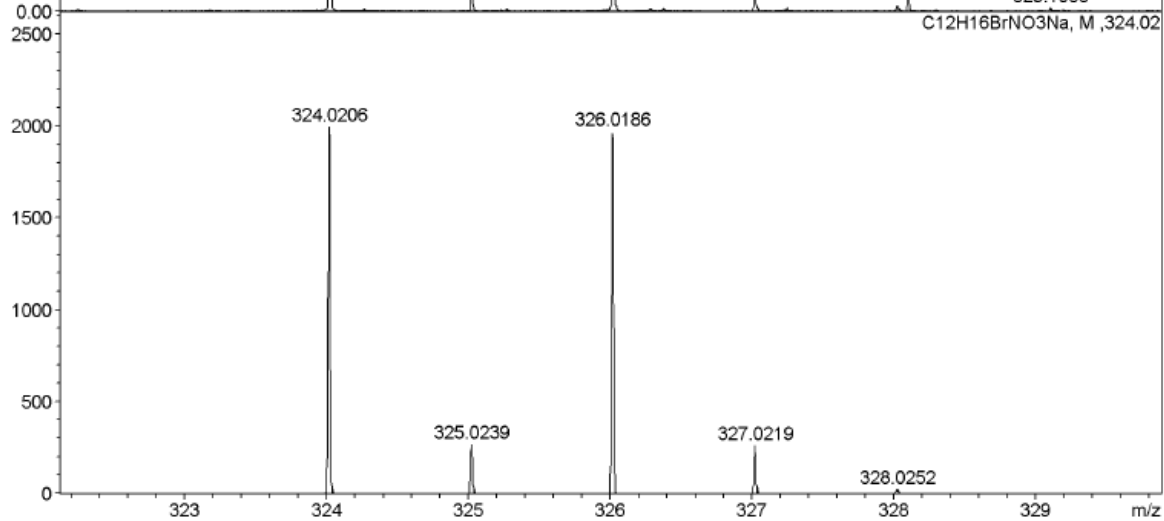

<sup>1</sup>H-NMR spectrum of **3** in CD<sub>2</sub>Cl<sub>2</sub>

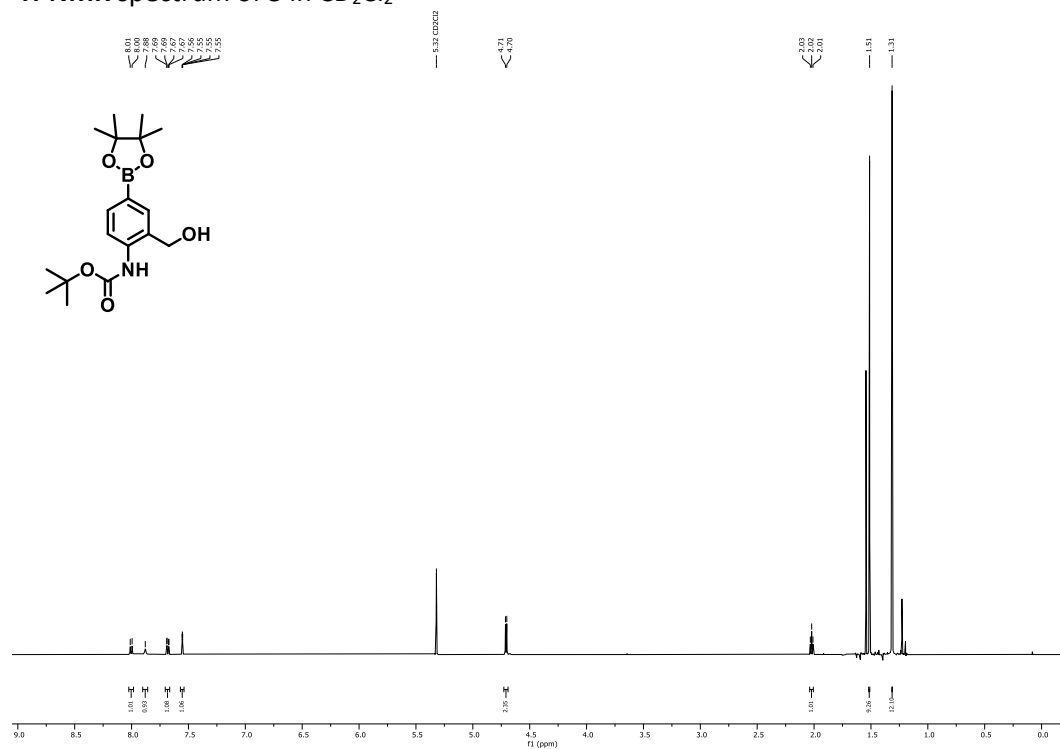

<sup>13</sup>C-NMR spectrum of **3** in CD<sub>2</sub>Cl<sub>2</sub>

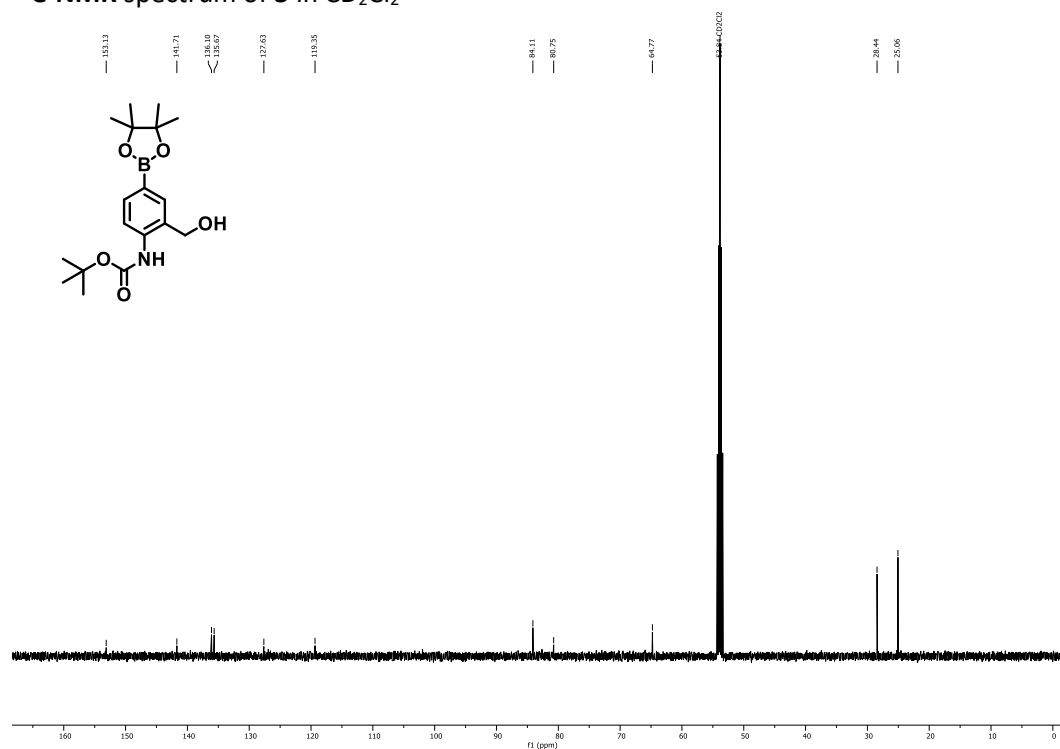

HR-ESI-MS spectrum of 3

## High Resolution Mass Spectrometry Report

Sample Name **KRO 342**  
Comment

Instrument **maXis 4G**  
Method **ms\_nocolumn\_mid\_pos.m**

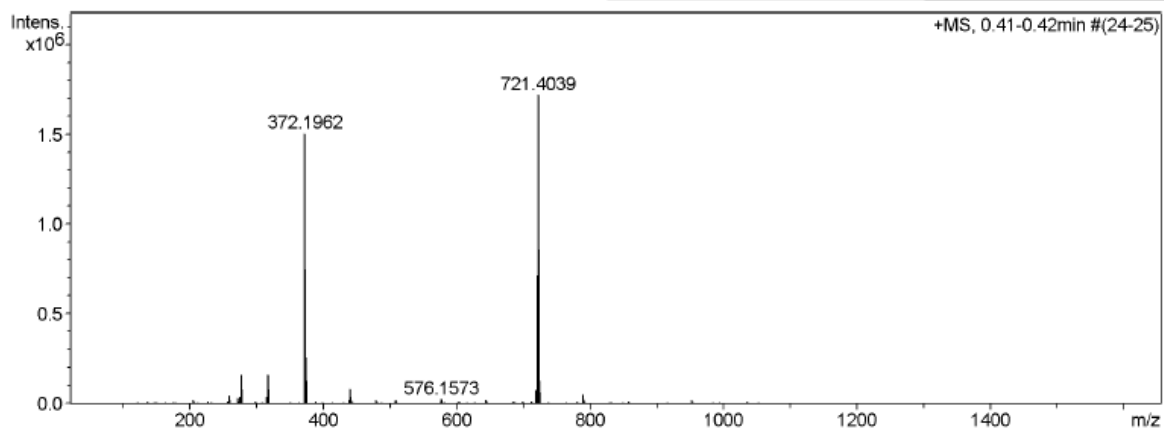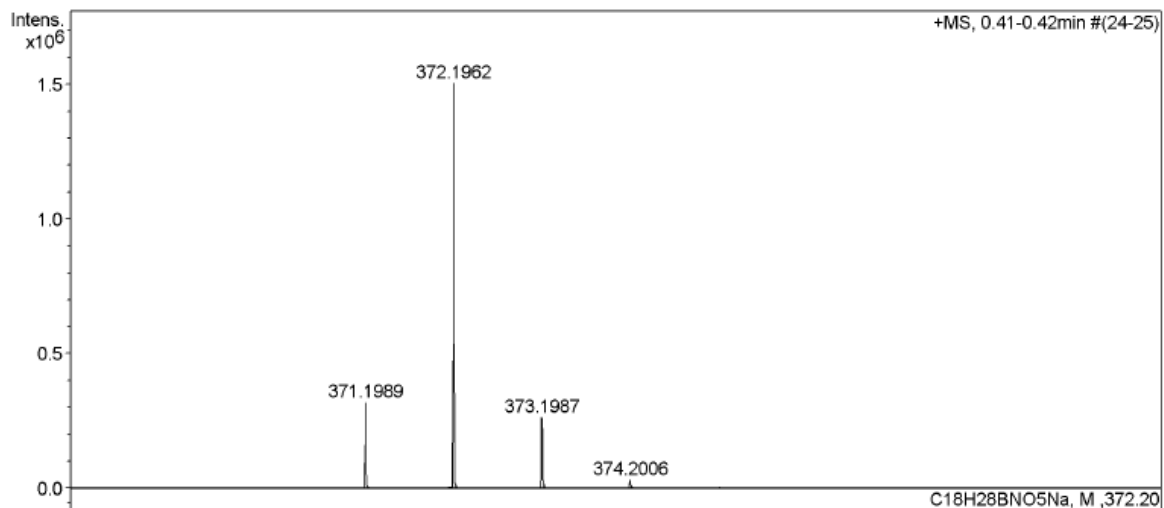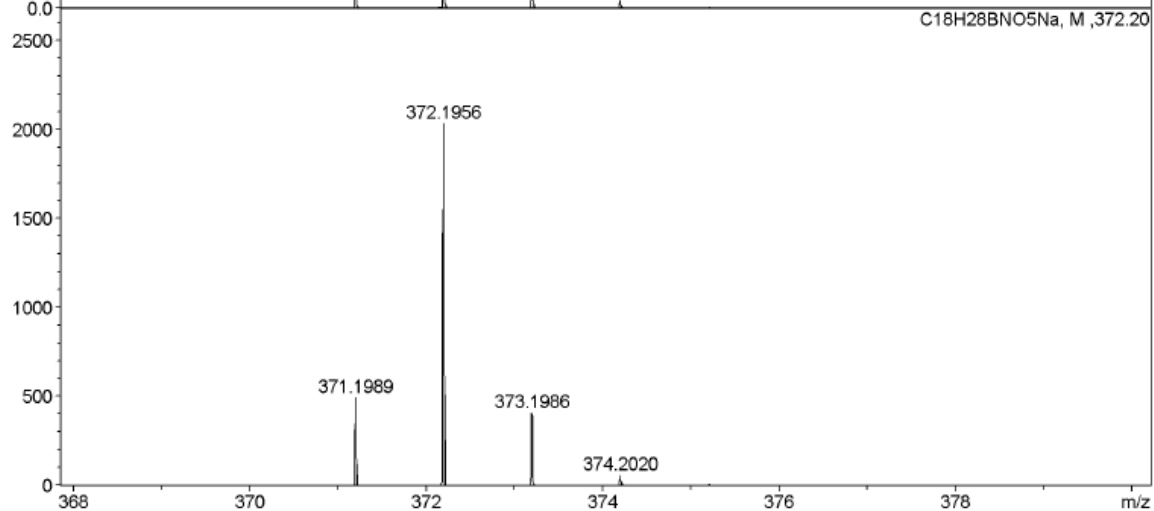





# HR-ESI-MS spectrum of 1

## High Resolution Mass Spectrometry Report

Sample Name **KRO333**  
Comment

Instrument **maXis 4G**  
Method **ms\_nocolumn\_mid\_pos.m**

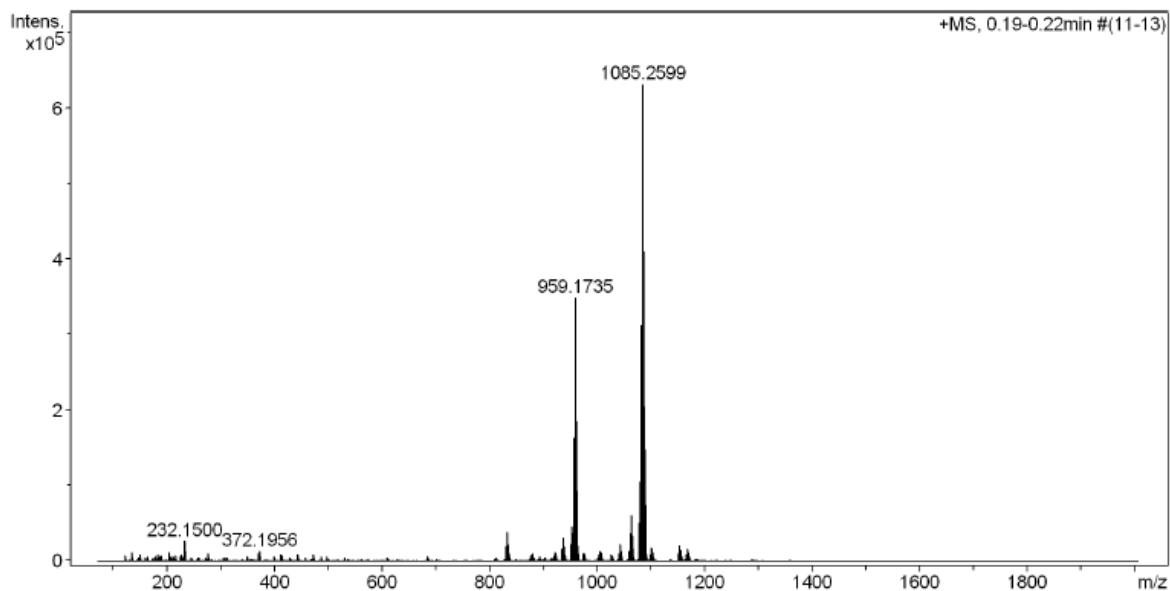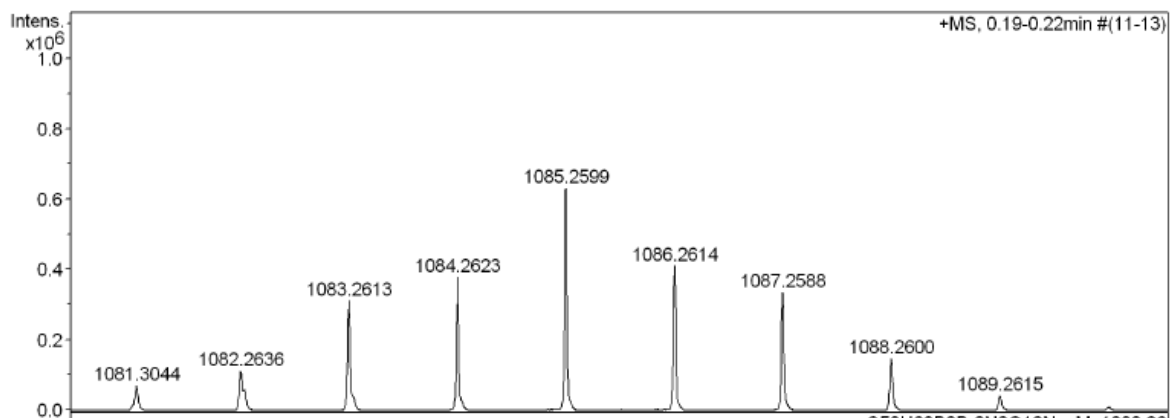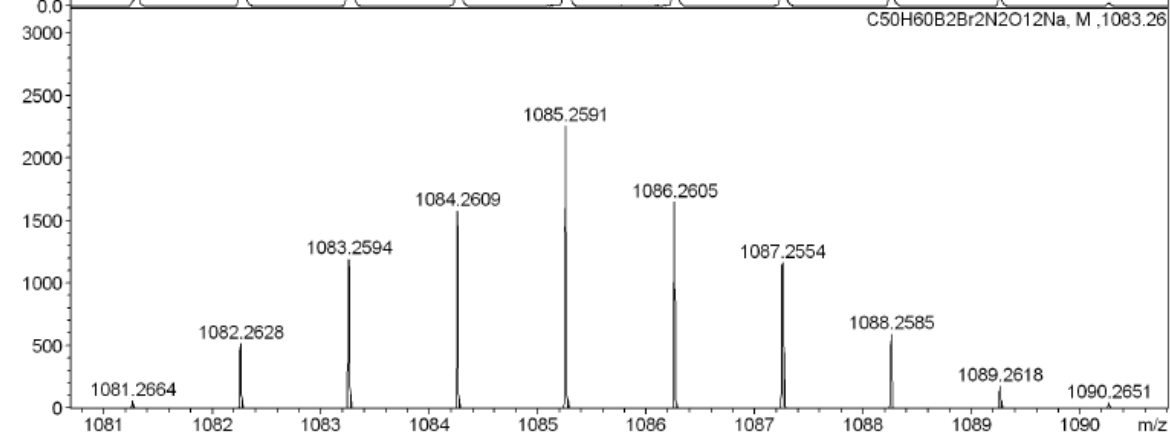

# <sup>1</sup>H-NMR spectrum of C<sub>Br2</sub>Boc<sub>2</sub> in CD<sub>2</sub>Cl<sub>2</sub>

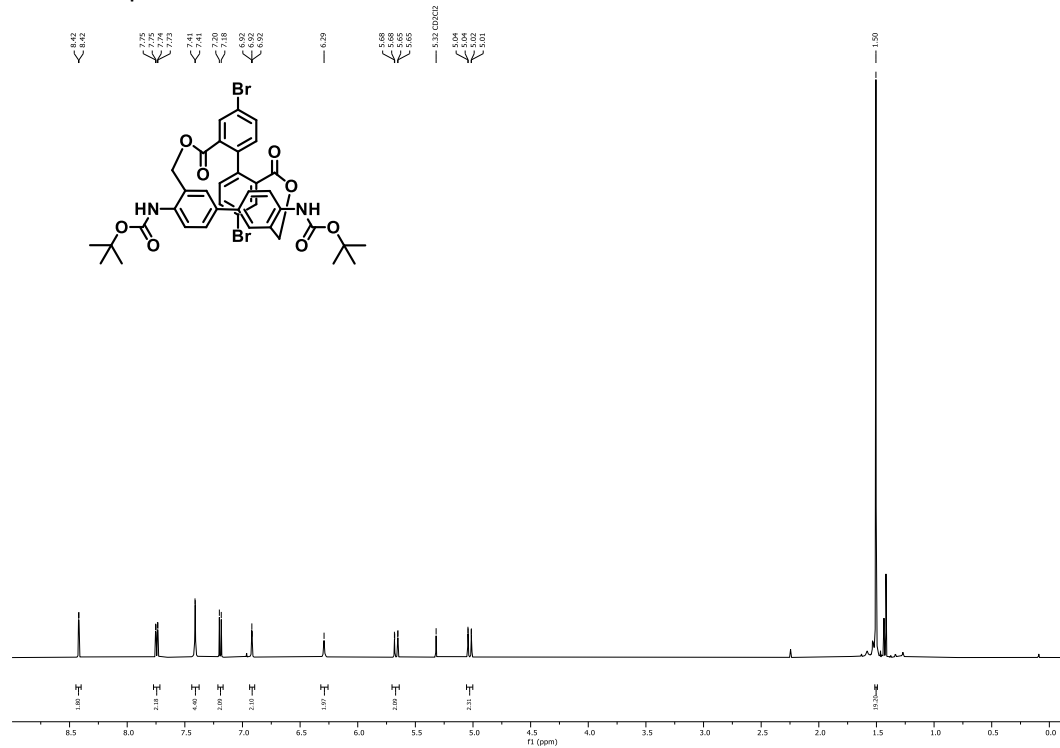

# <sup>13</sup>C-NMR spectrum of C<sub>Br2</sub>Boc<sub>2</sub> in CD<sub>2</sub>Cl<sub>2</sub>

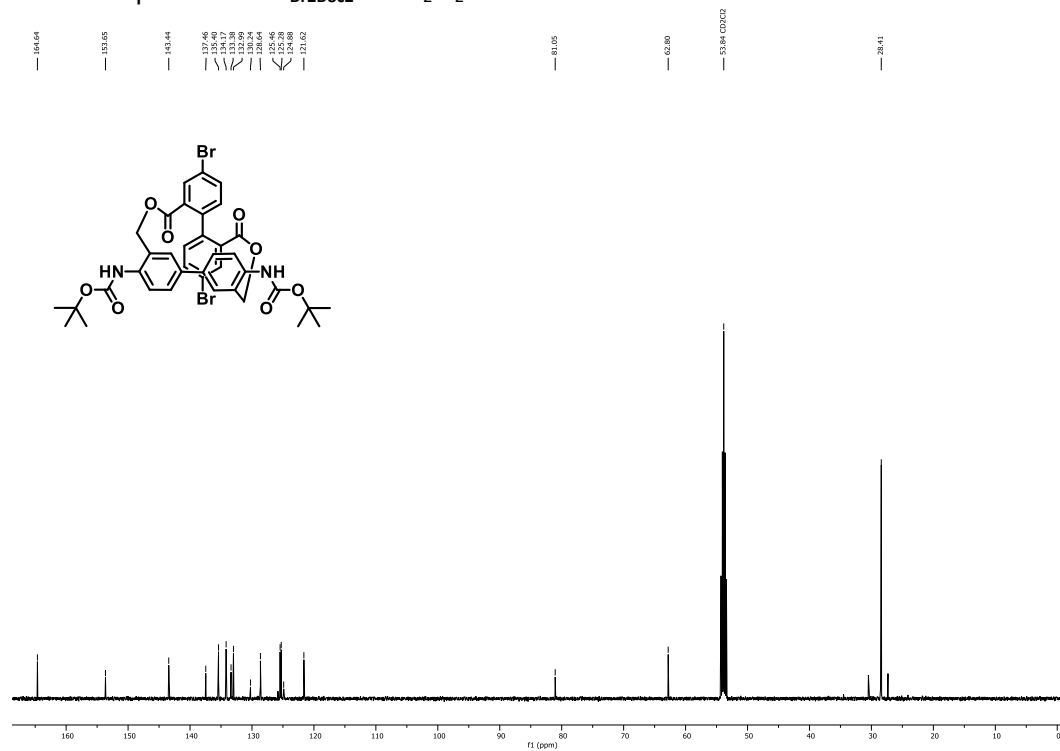

## High Resolution Mass Spectrometry Report

Sample Name **KRO335**  
Comment

Instrument **maXis 4G**  
Method **ms\_nocolumn\_mid\_pos.m**

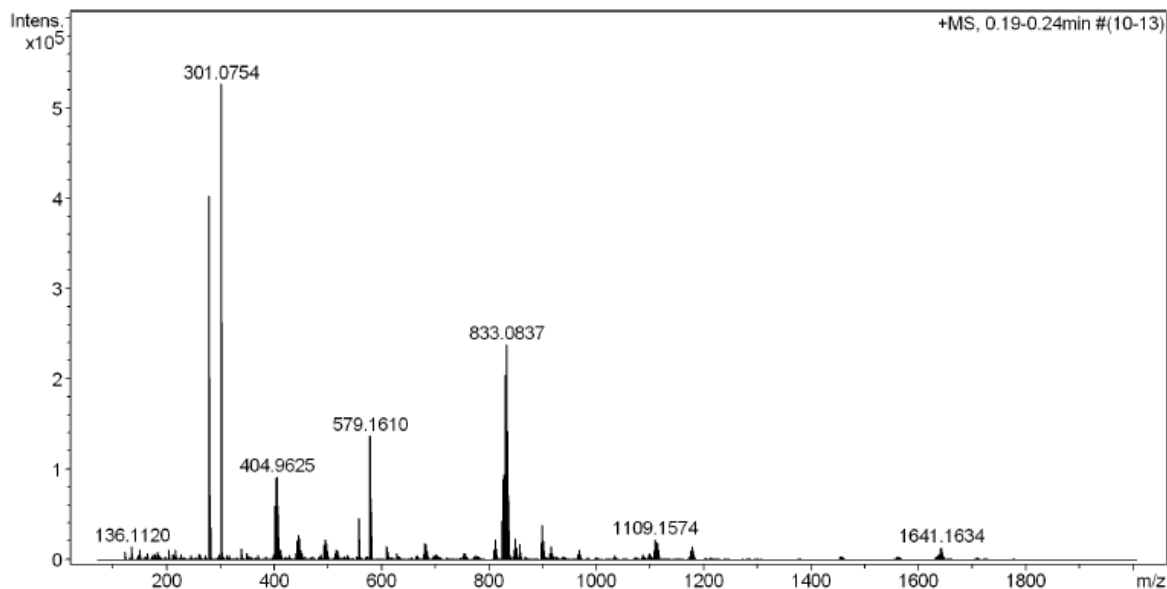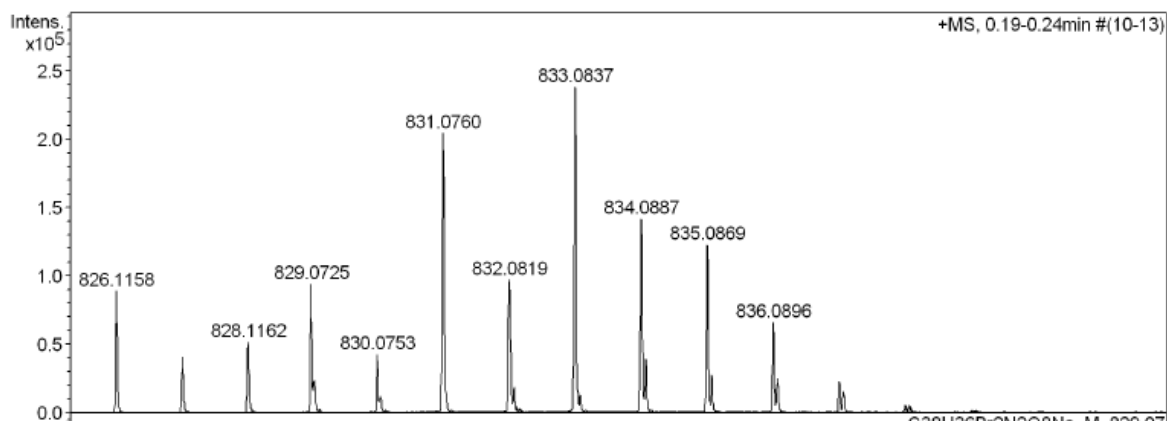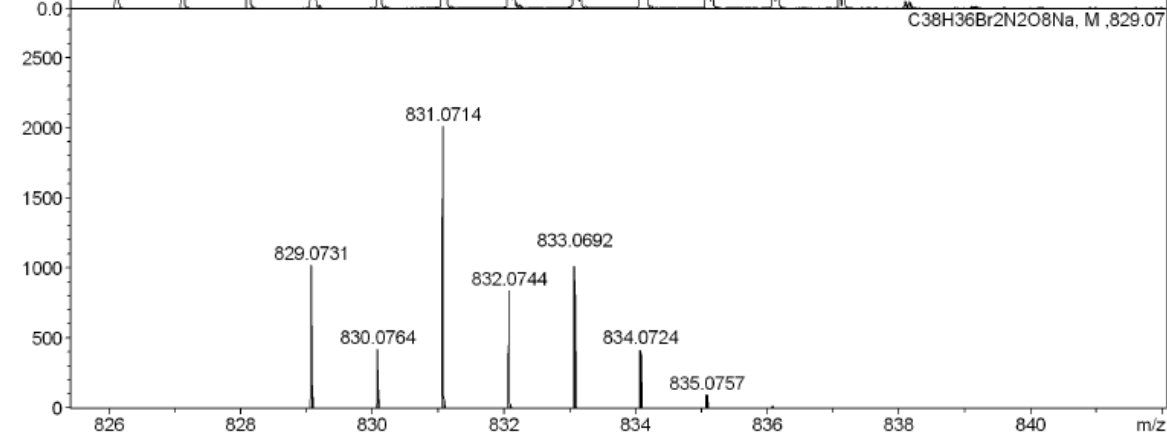

**<sup>1</sup>H-NMR spectrum of C<sub>Br</sub>2I<sub>2</sub> in CD<sub>2</sub>Cl<sub>2</sub>**

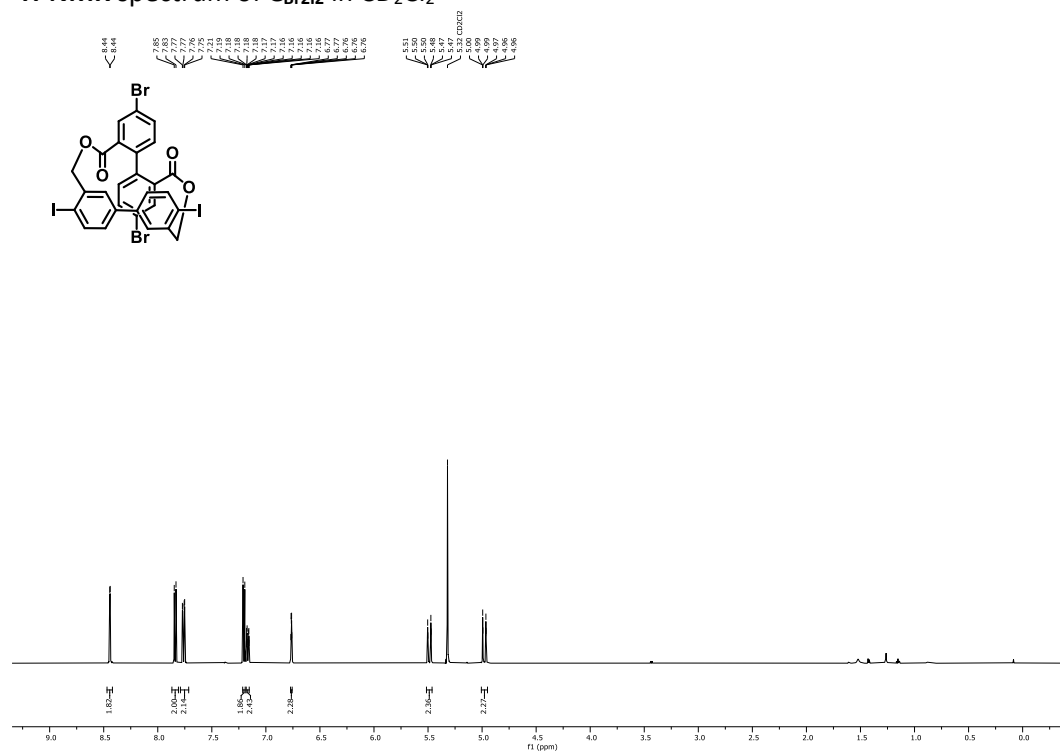

**<sup>13</sup>C-NMR spectrum of C<sub>Br</sub>2I<sub>2</sub> in CD<sub>2</sub>Cl<sub>2</sub>**

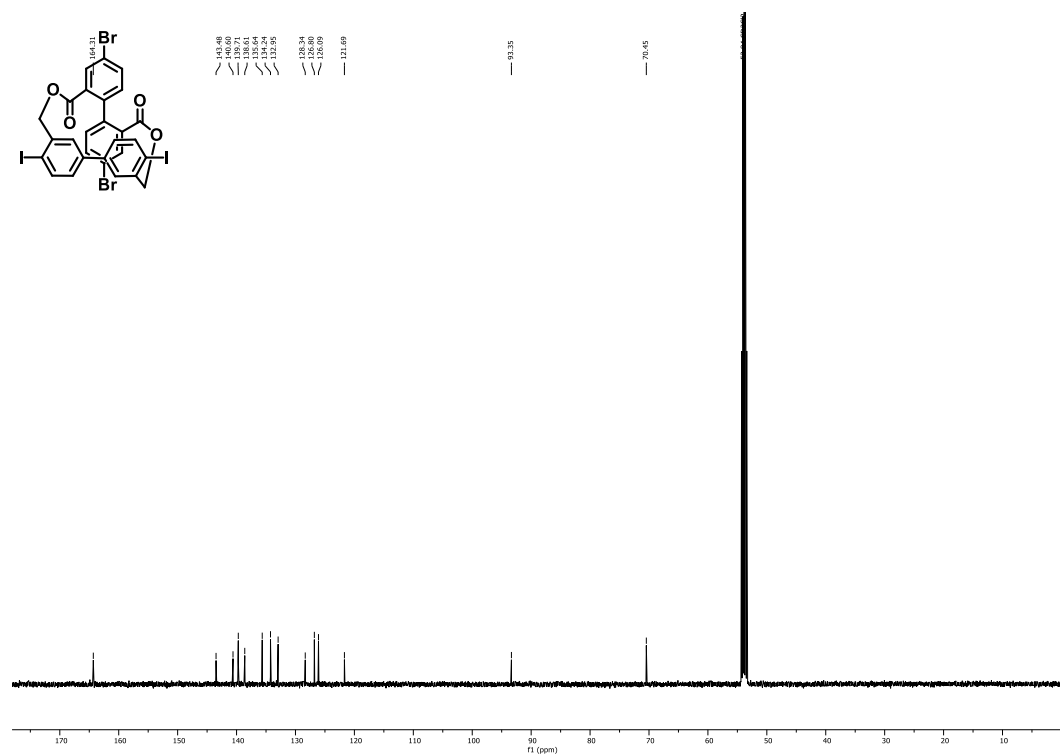

COSY spectrum of **C<sub>Br2I2</sub>** in CD<sub>2</sub>Cl<sub>2</sub>

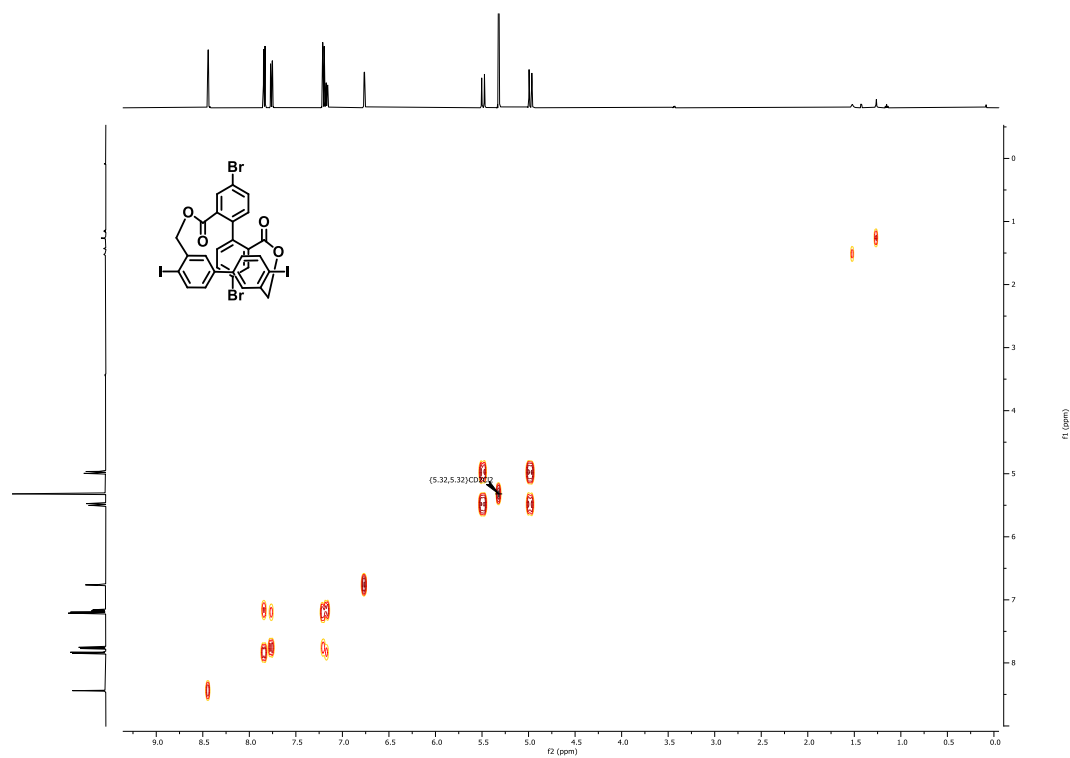

HMQC spectrum of **C<sub>Br2I2</sub>** in CD<sub>2</sub>Cl<sub>2</sub>

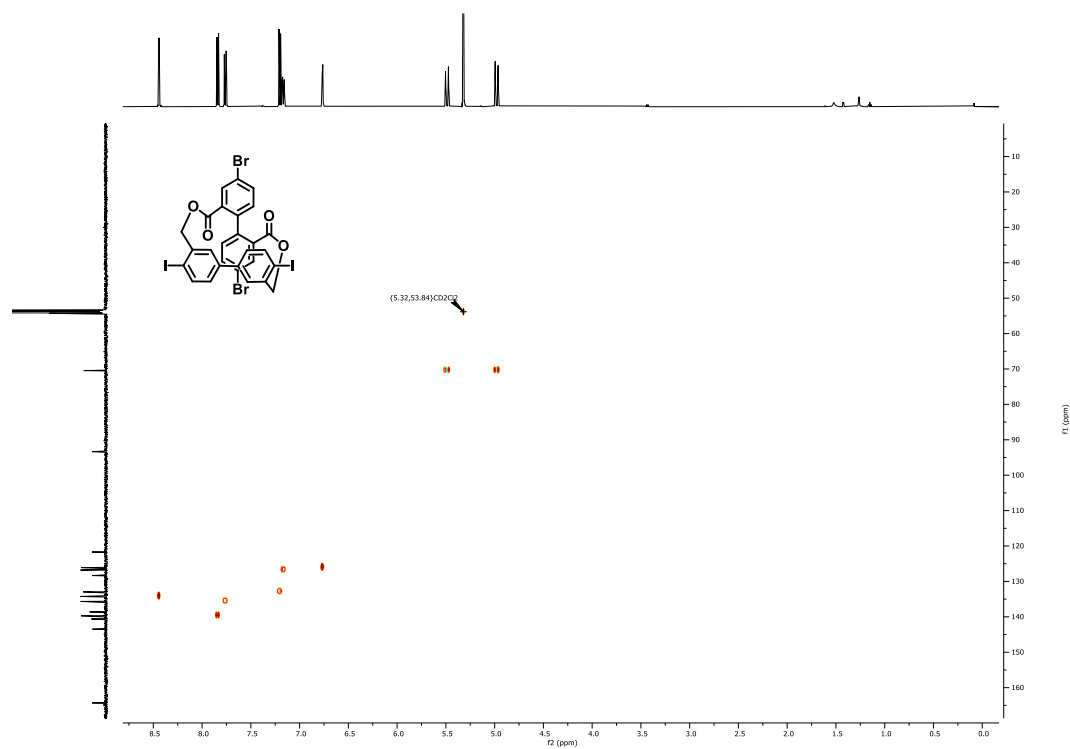

HMBC spectrum of **C<sub>Br2I2</sub>** in CD<sub>2</sub>Cl<sub>2</sub>

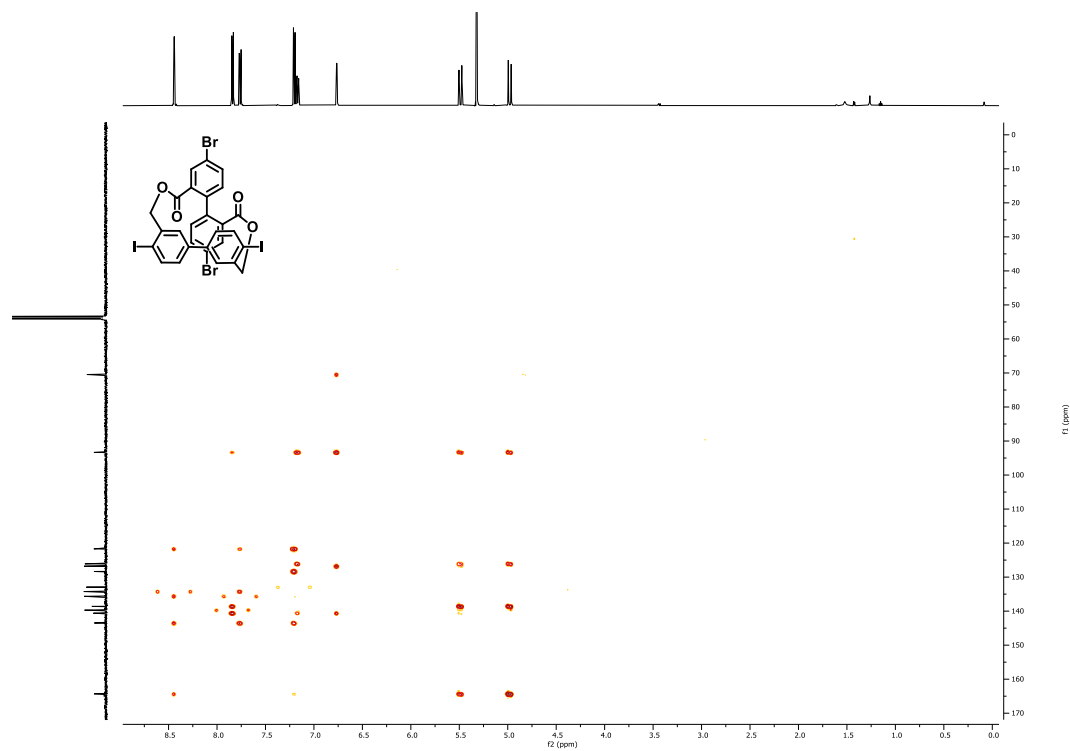

FT-IR spectrum of **C<sub>Br2I2</sub>** (neat)

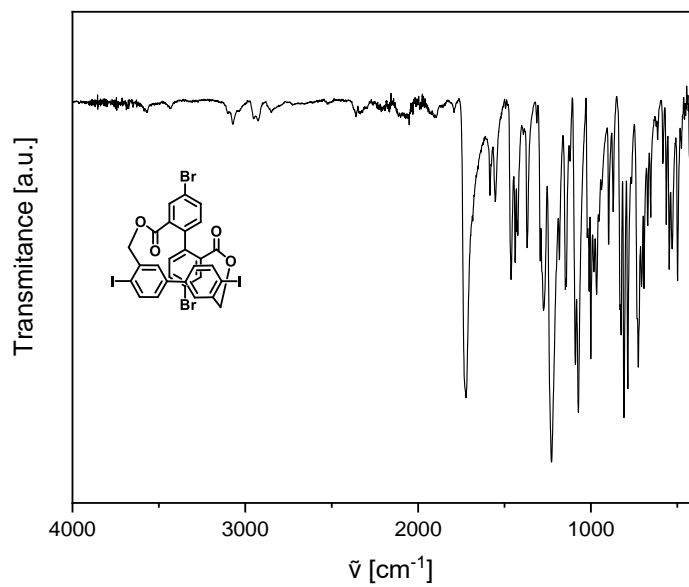

## High Resolution Mass Spectrometry Report

Sample Name **KRO337**  
 Comment

Instrument **maXis 4G**  
 Method **ms\_nocolumn\_higher\_pos.m**

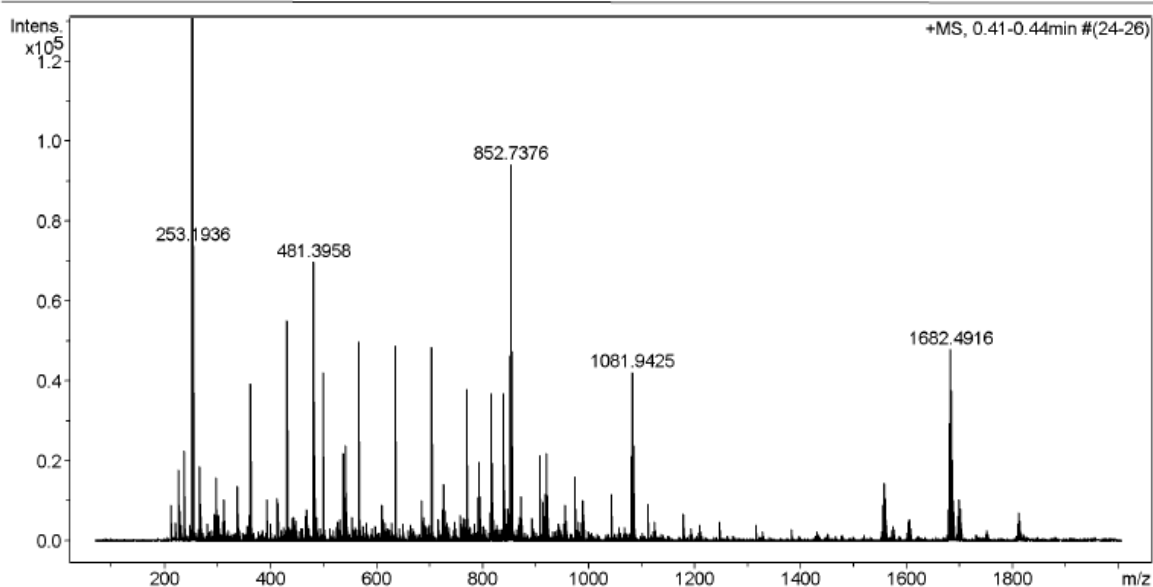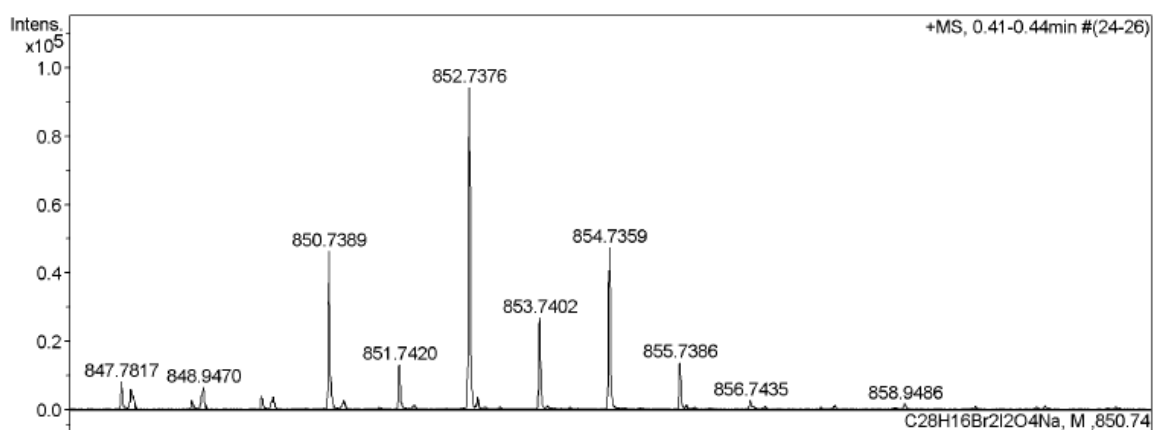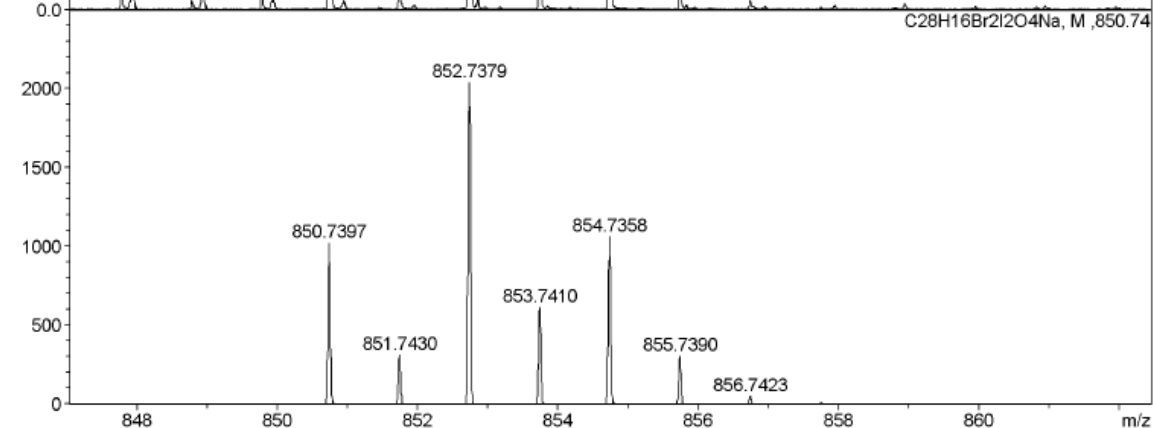



**<sup>1</sup>H-NMR spectrum of NI-Br in CD<sub>2</sub>Cl<sub>2</sub>**

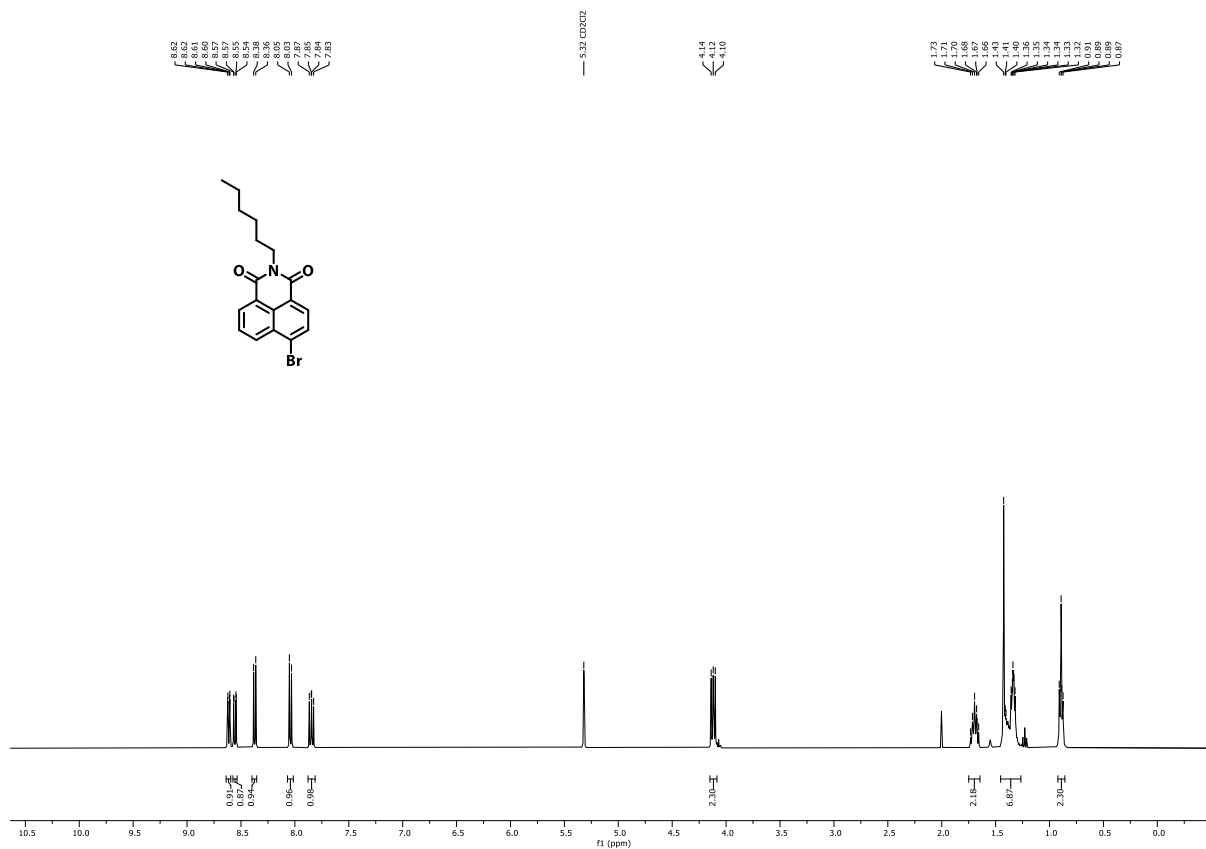

**<sup>13</sup>C-NMR spectrum of NI-Br in CD<sub>2</sub>Cl<sub>2</sub>**

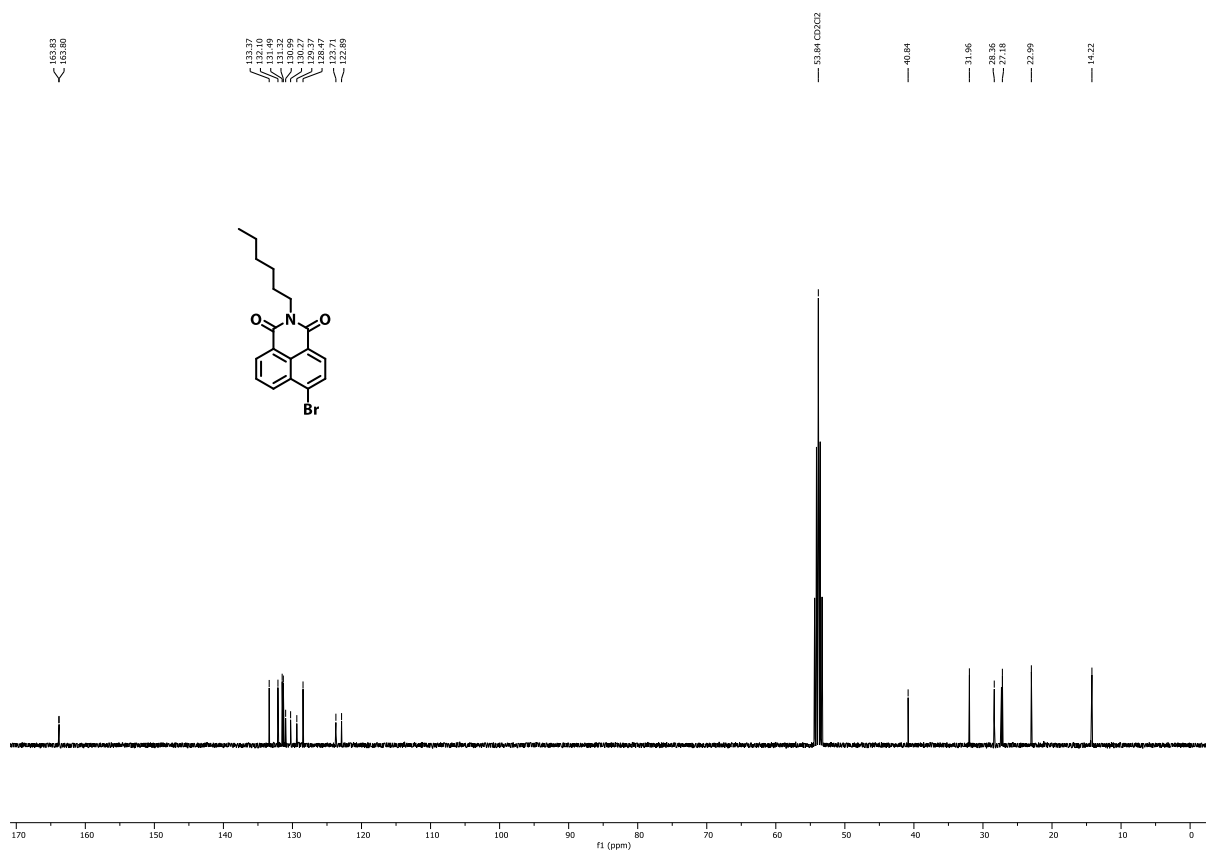

# HR-ESI-MS spectrum of NI-Br

## High Resolution Mass Spectrometry Report

Sample Name **KRO472**  
Comment

Instrument **maXis 4G**  
Method **ms\_nocolumn\_mid\_pos.m**

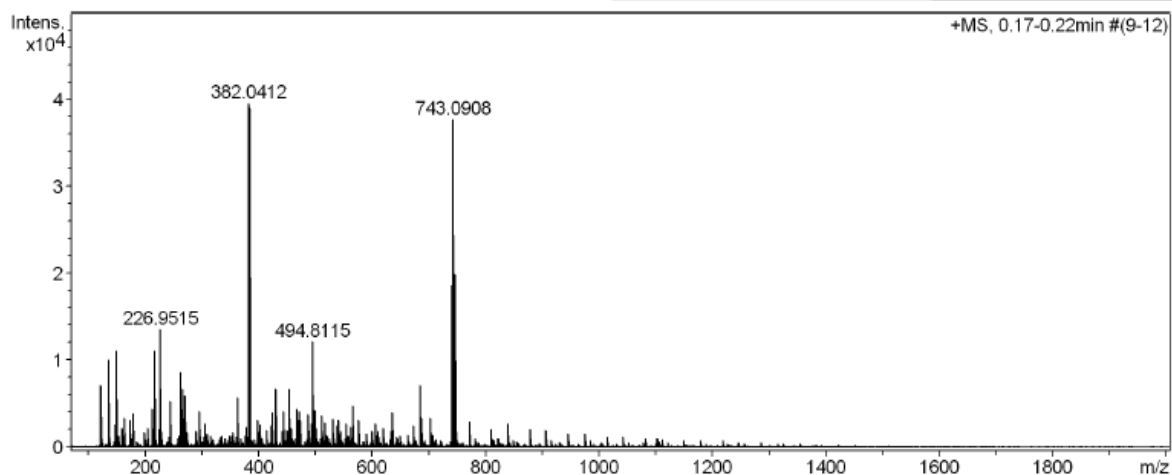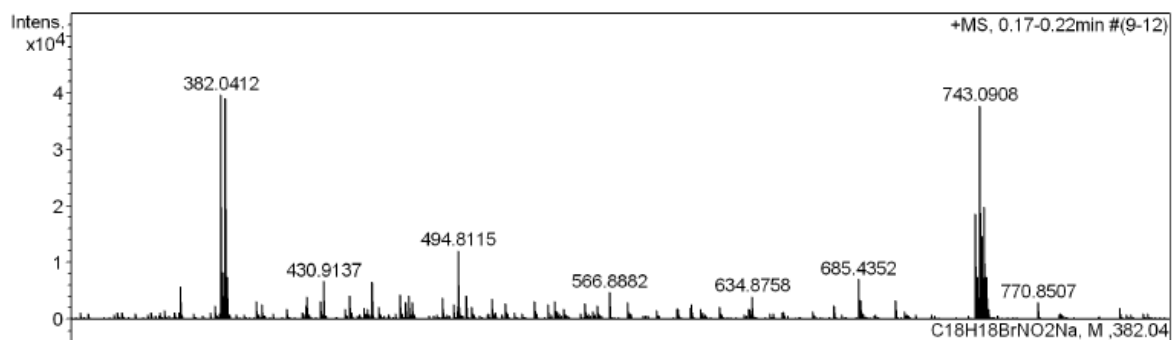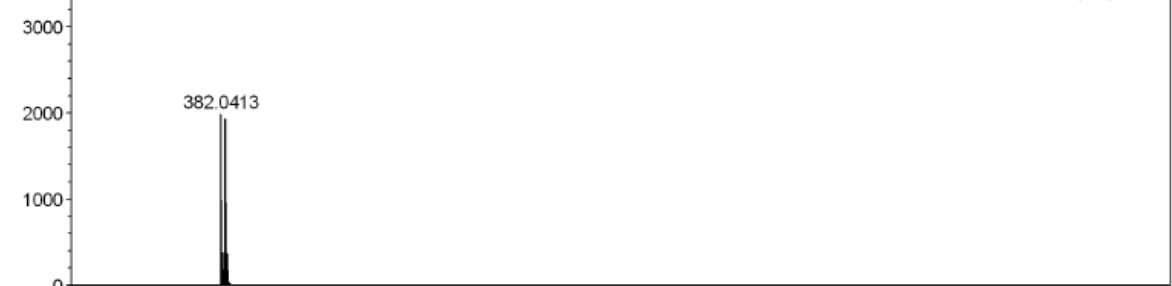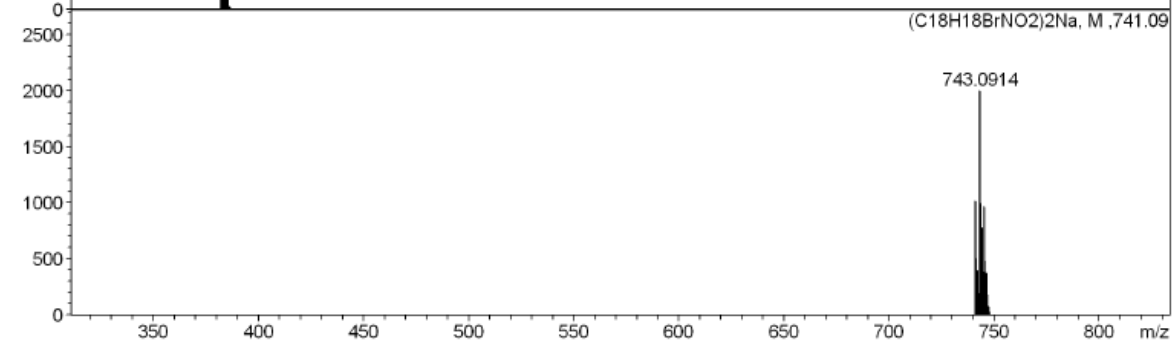

### <sup>1</sup>H-NMR spectrum of NI-BPin in CD<sub>2</sub>Cl<sub>2</sub>

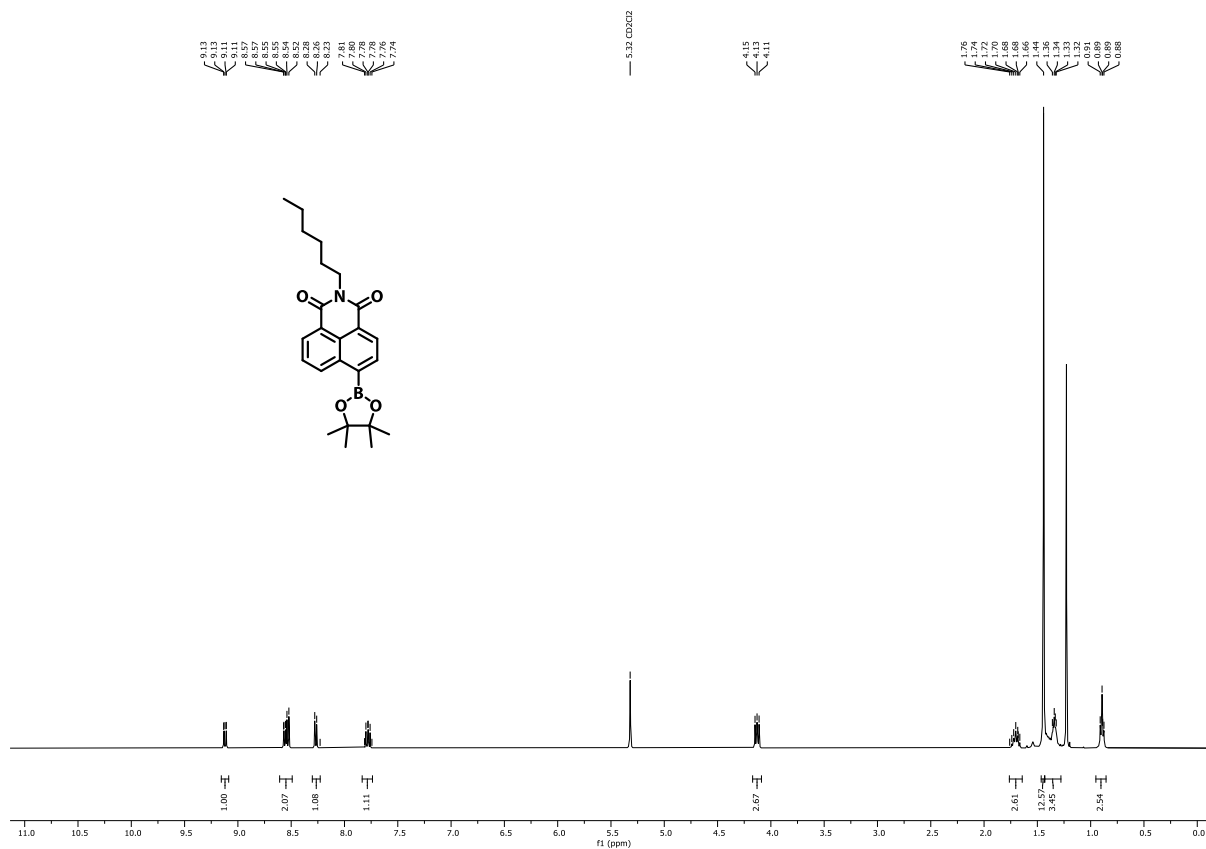

### <sup>13</sup>C-NMR spectrum of NI-BPin in CD<sub>2</sub>Cl<sub>2</sub>

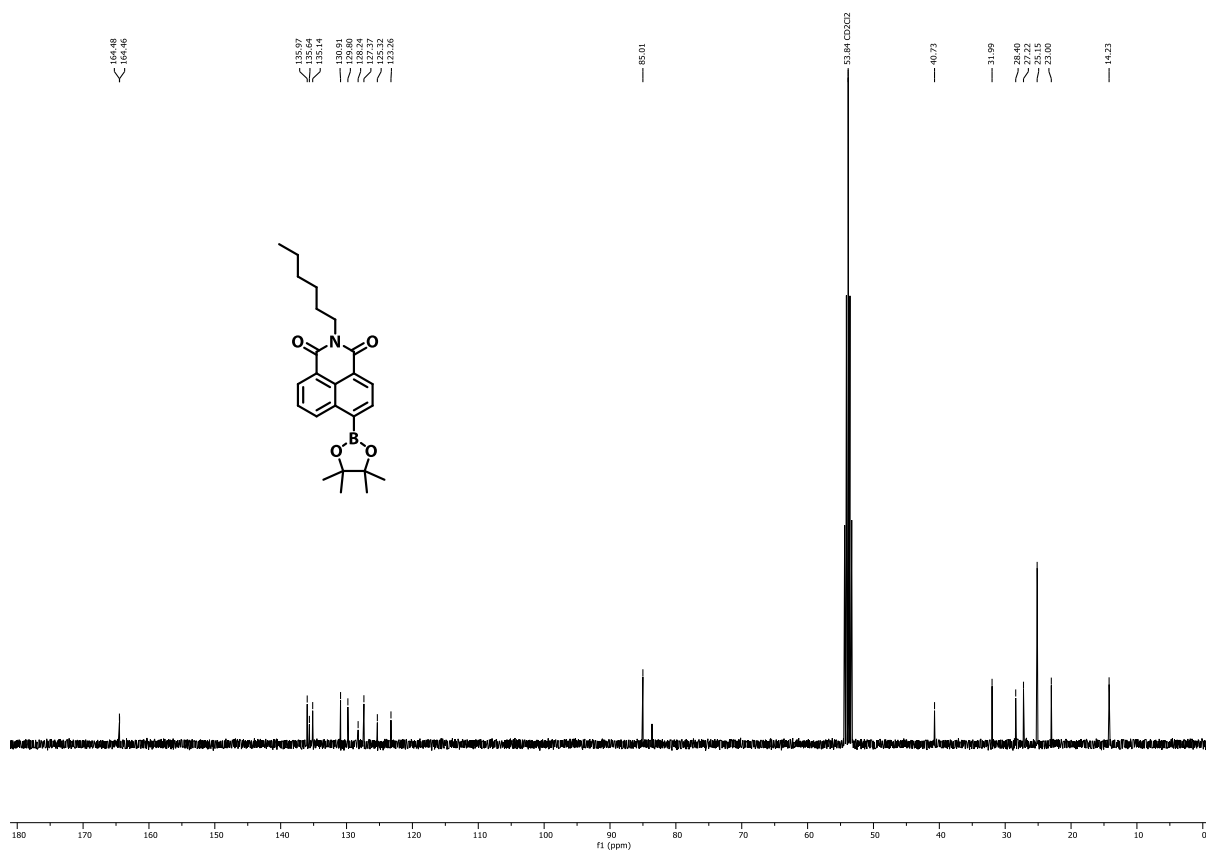

# HR-ESI-MS spectrum of NI-BPIN

## High Resolution Mass Spectrometry Report

Sample Name **KRO475**  
Comment

Instrument **maXis 4G**  
Method **ms\_nocolumn\_mid\_pos.m**

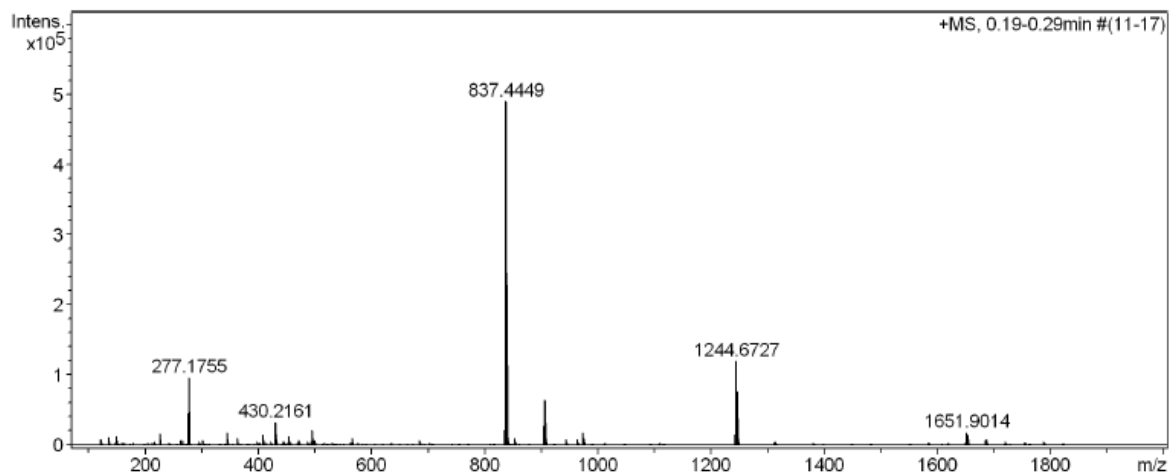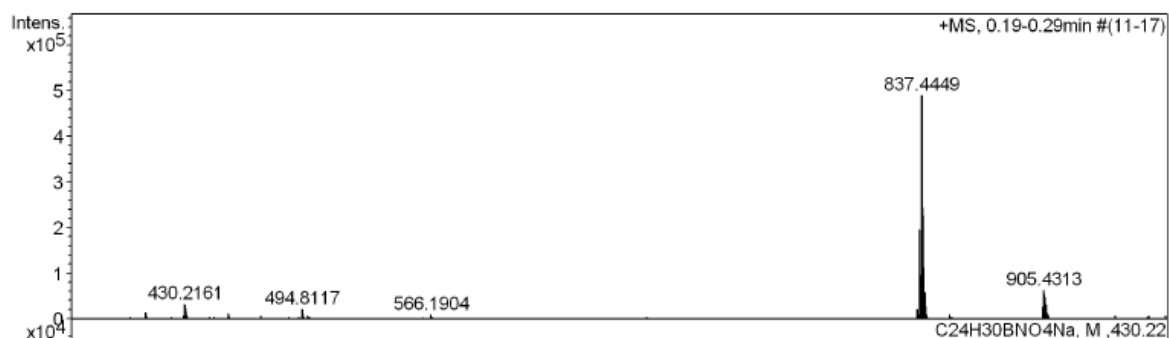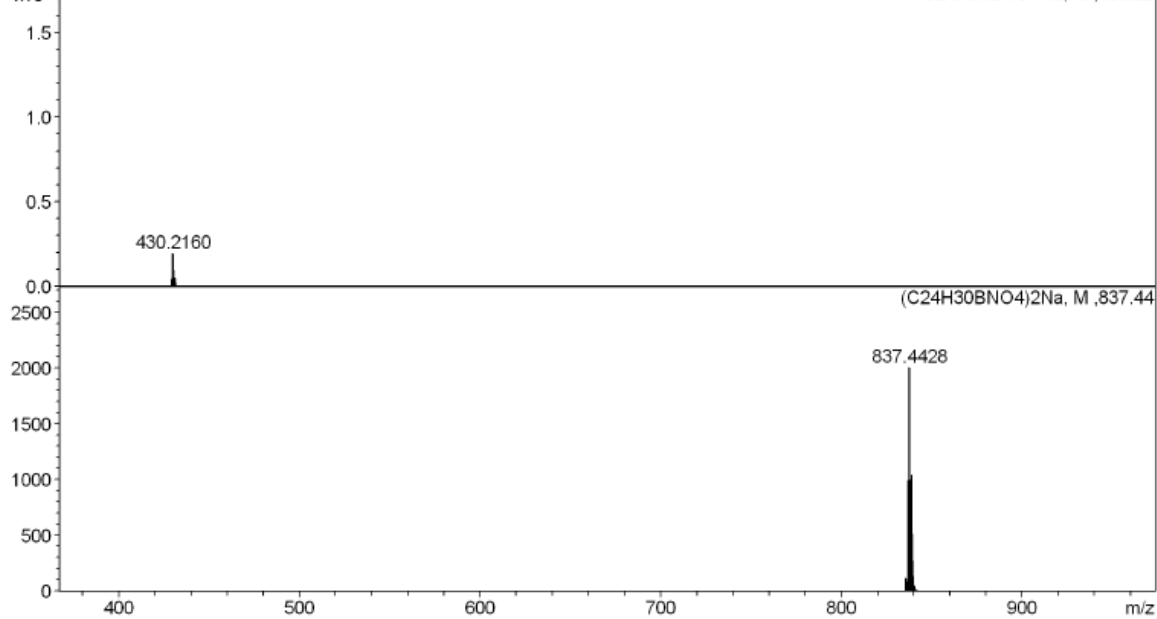

### <sup>1</sup>H-NMR spectrum of **BY-Br** in CD<sub>2</sub>Cl<sub>2</sub>

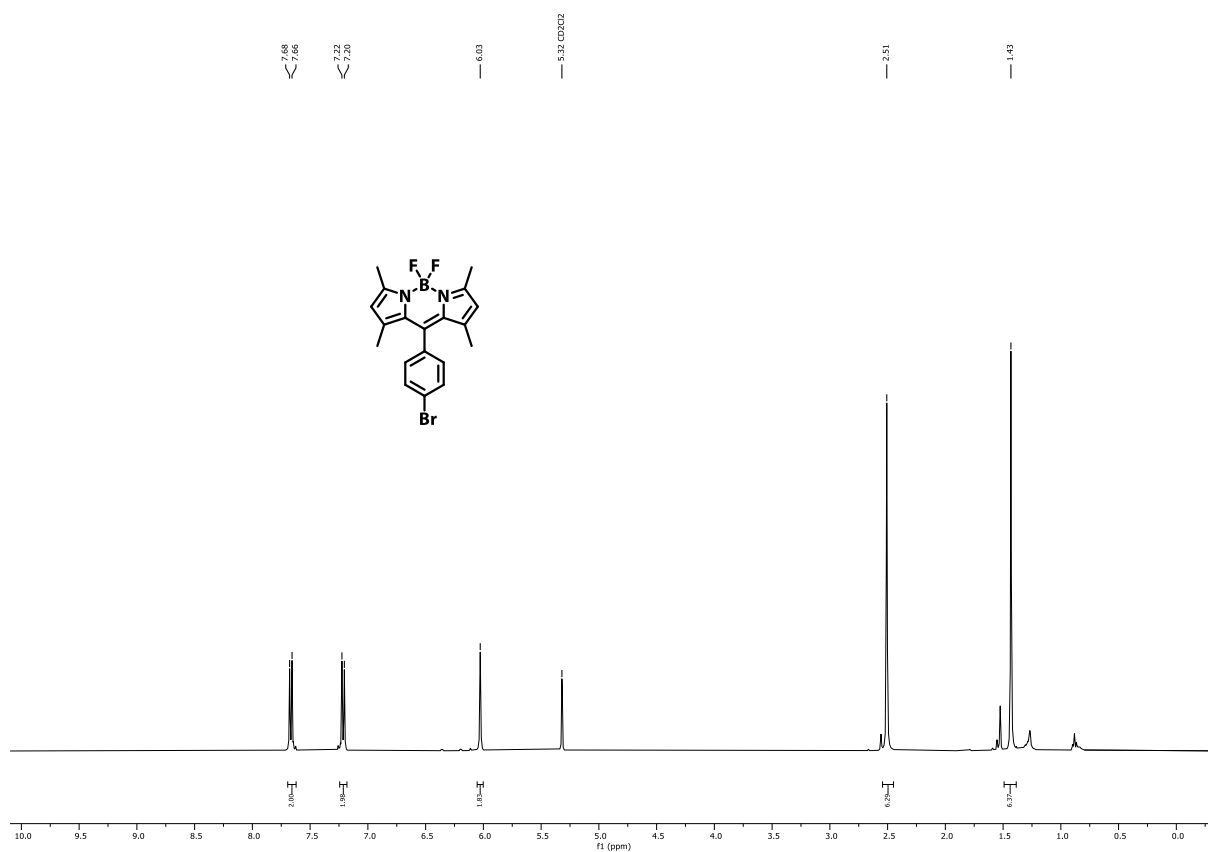

### <sup>13</sup>C-NMR spectrum of **BY-Br** in CD<sub>2</sub>Cl<sub>2</sub>

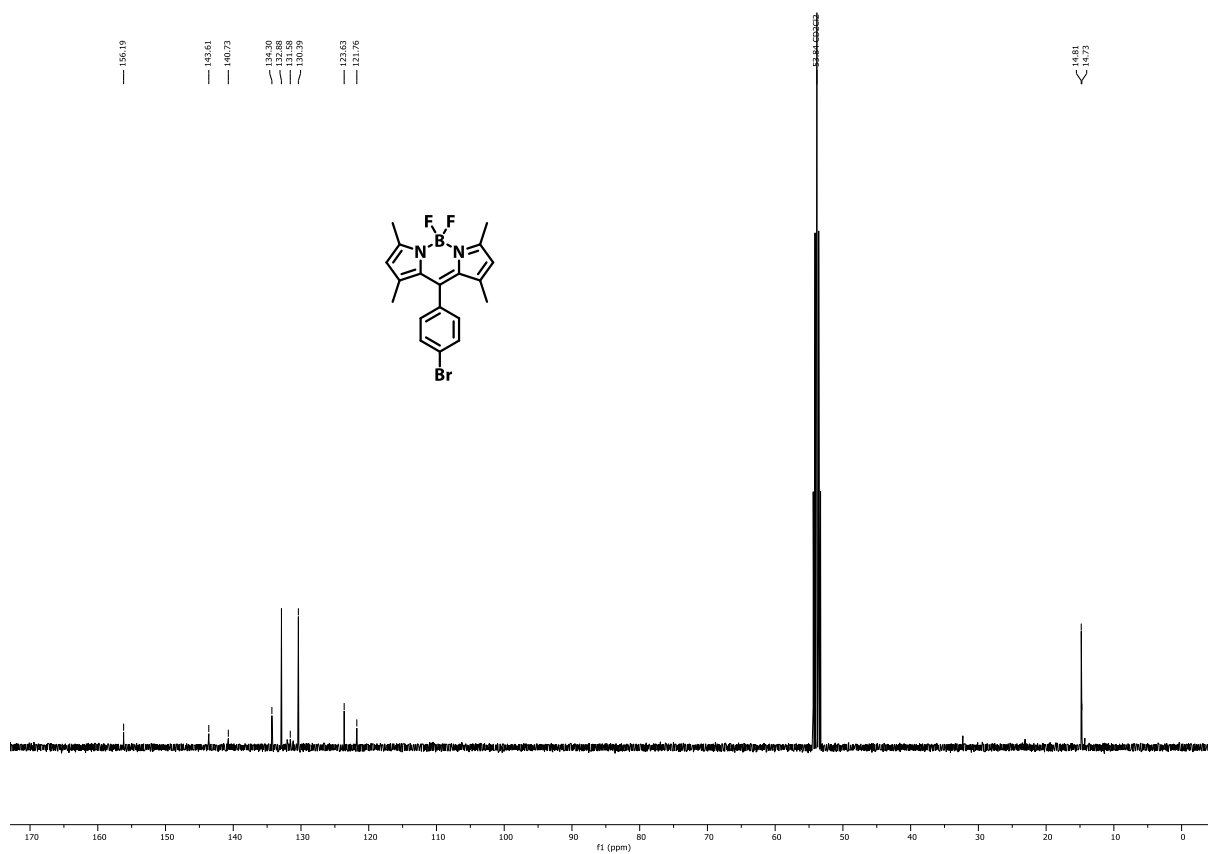

# HR-ESI-MS spectrum of BY-Br

## High Resolution Mass Spectrometry Report

Sample Name **KRO464**  
Comment

Instrument **maXis 4G**  
Method **ms\_nocolumn\_mid\_pos.m**

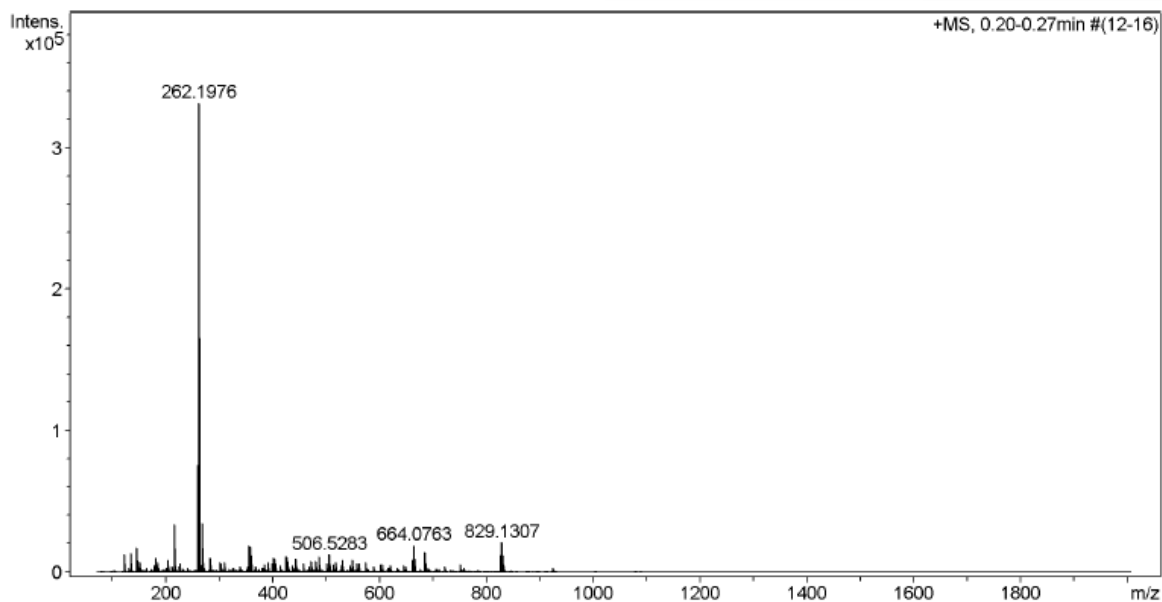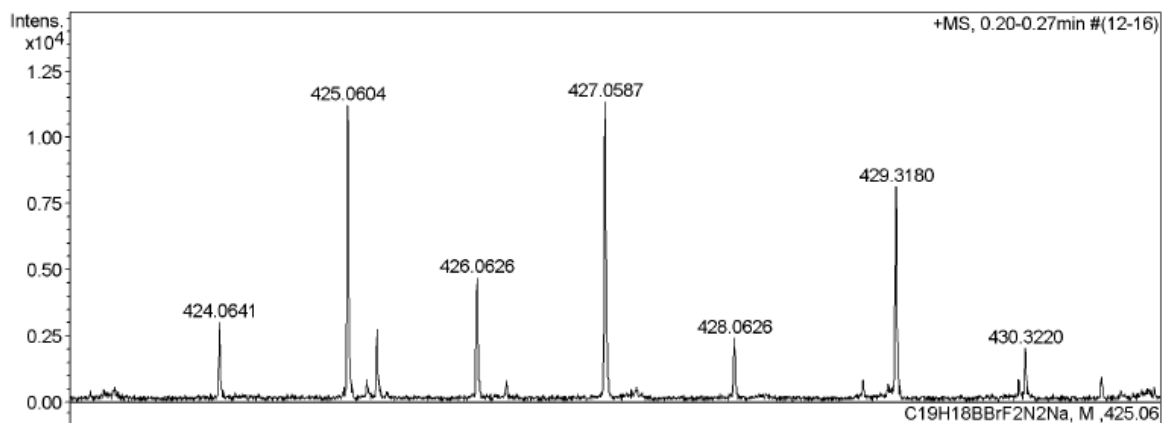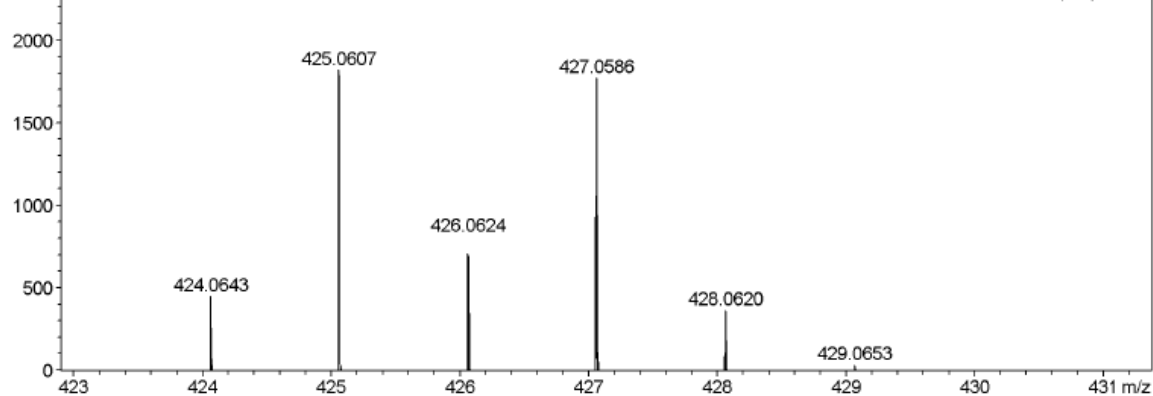

# <sup>1</sup>H-NMR spectrum of **BY-BPin** in CD<sub>2</sub>Cl<sub>2</sub>

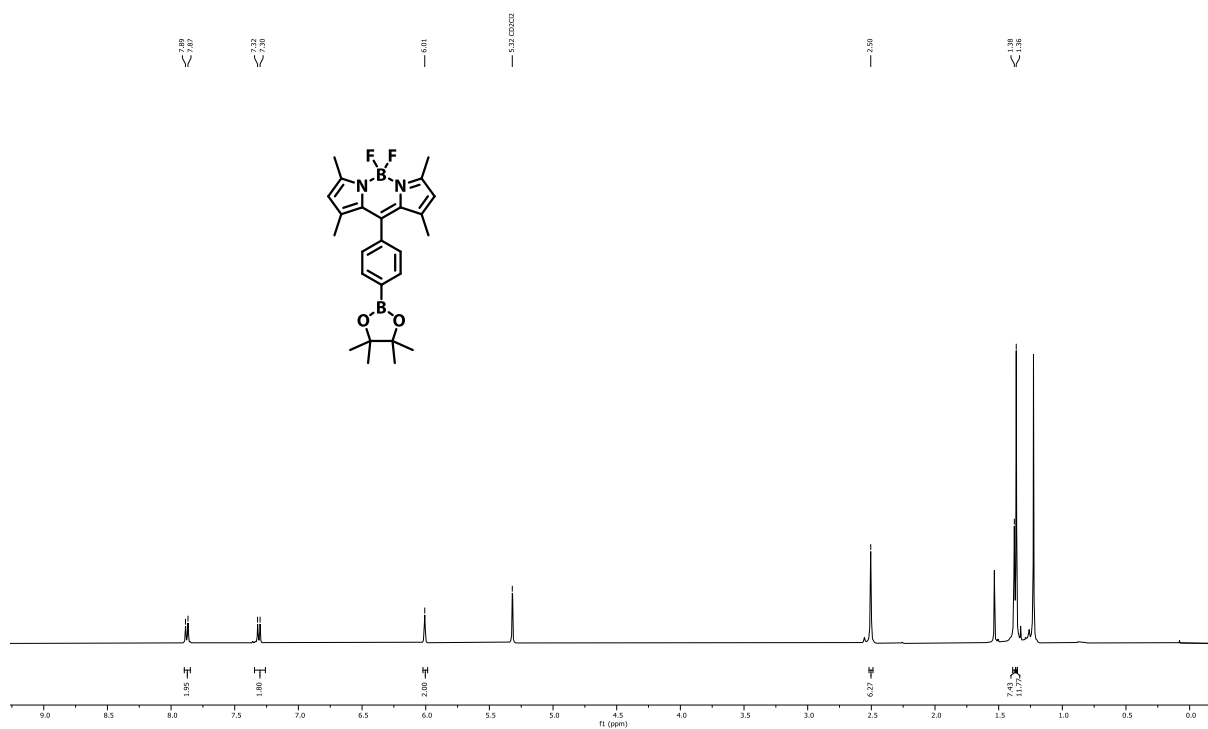

# <sup>13</sup>C-NMR spectrum of **BY-BPin** in CD<sub>2</sub>Cl<sub>2</sub>

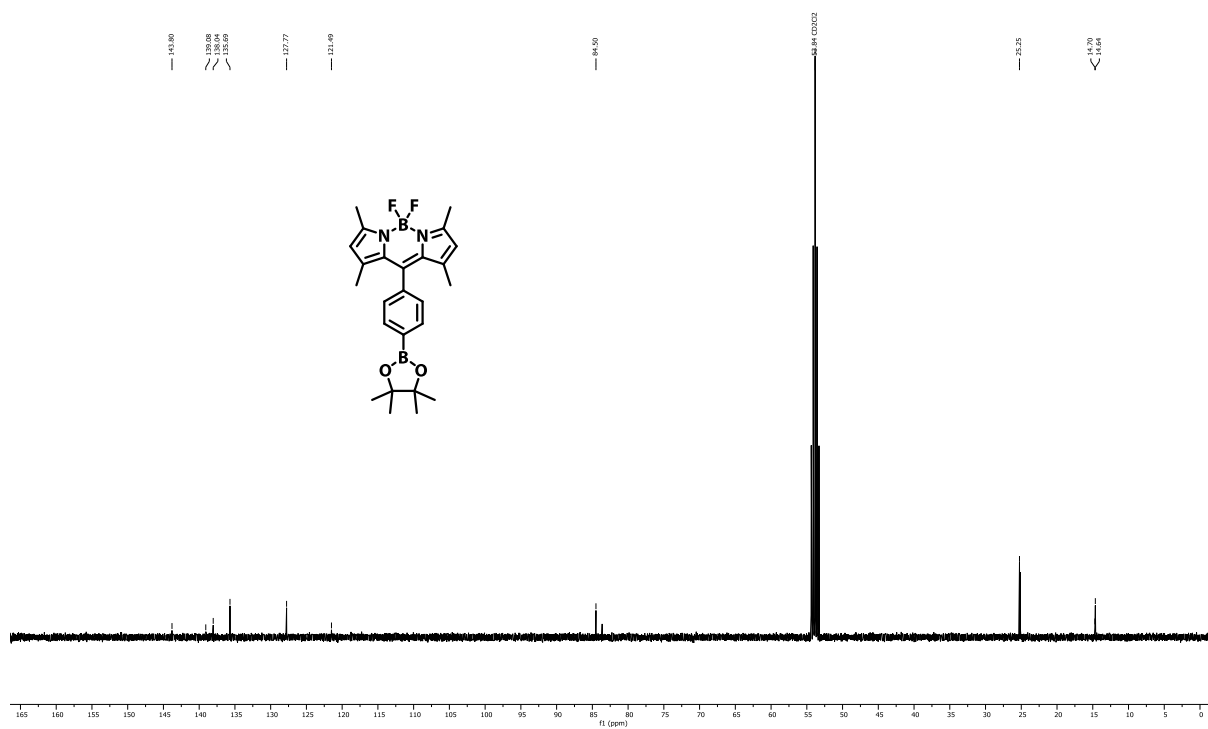

# HR-ESI-MS spectrum of BY-BPin

## High Resolution Mass Spectrometry Report

Sample Name **KRO468**  
Comment

Instrument **maXis 4G**  
Method **ms\_nocolumn\_mid\_pos.m**

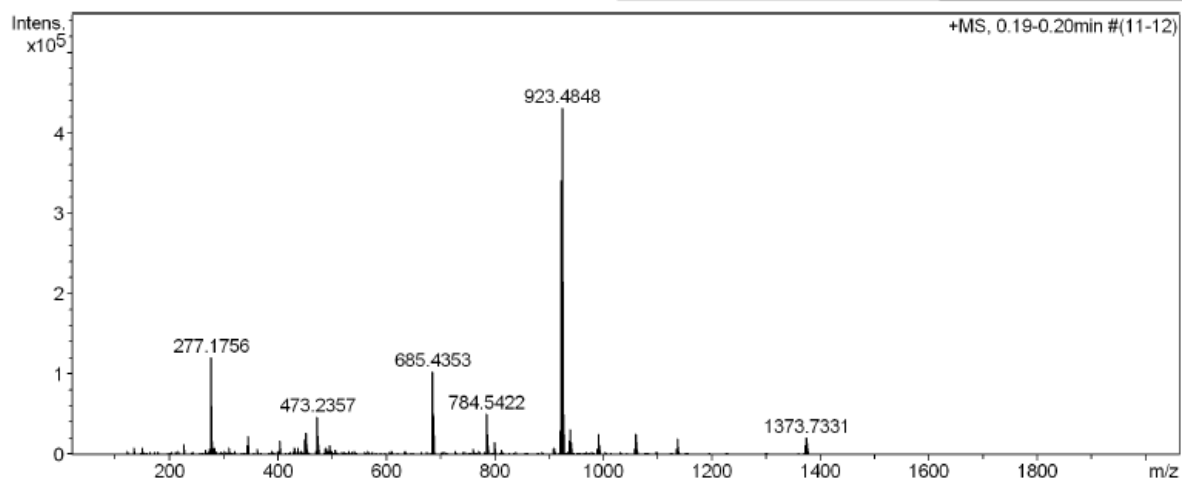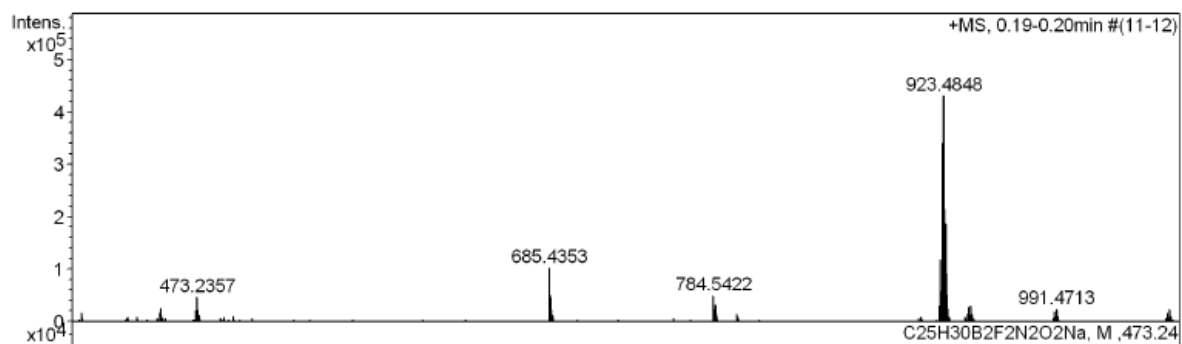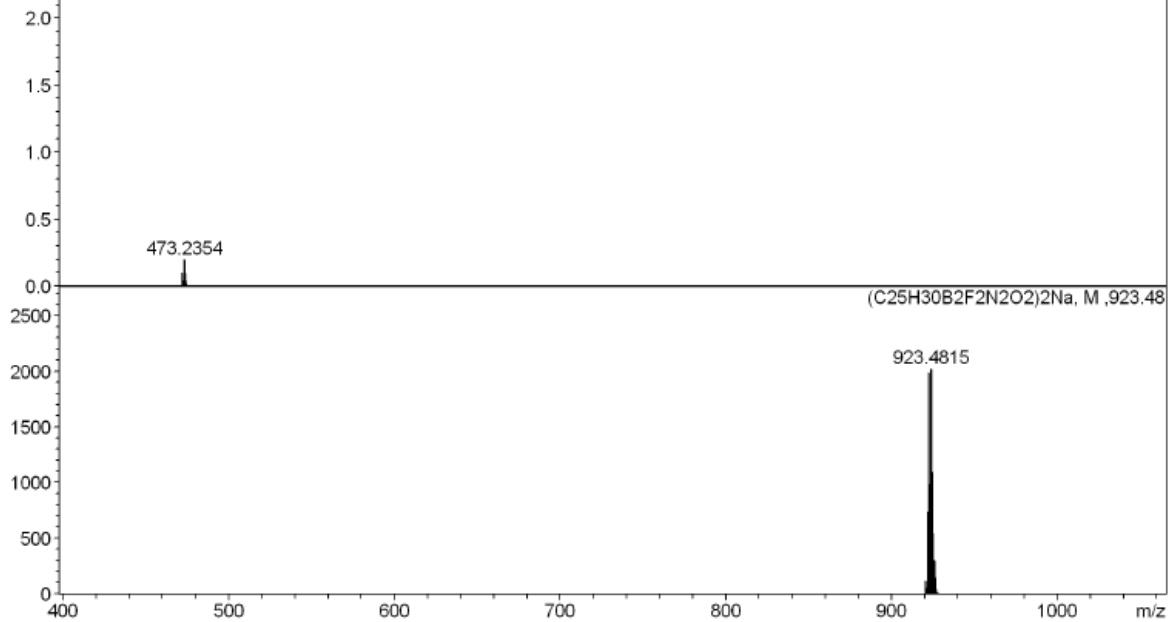





### COSY spectrum of $C_{Br_2Naph_2}$ in $CD_2Cl_2$

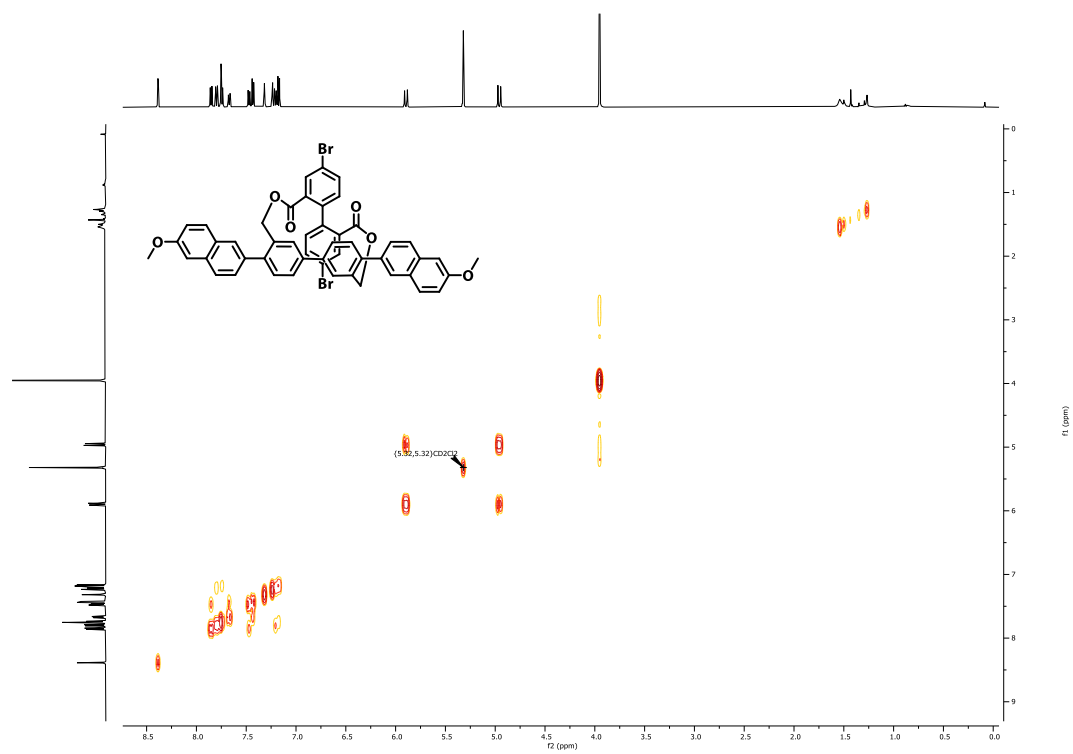

### HMQC spectrum of $C_{Br_2Naph_2}$ in $CD_2Cl_2$

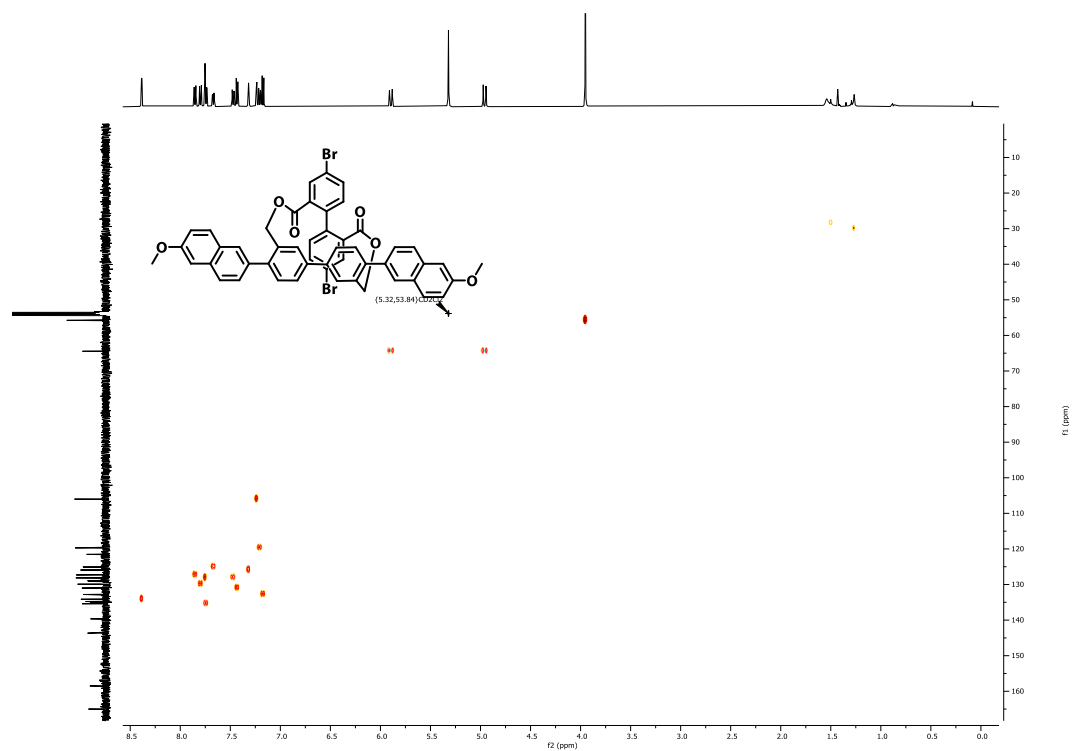

HMBC spectrum of **C**<sub>Br2</sub>Naph2 in CD<sub>2</sub>Cl<sub>2</sub>

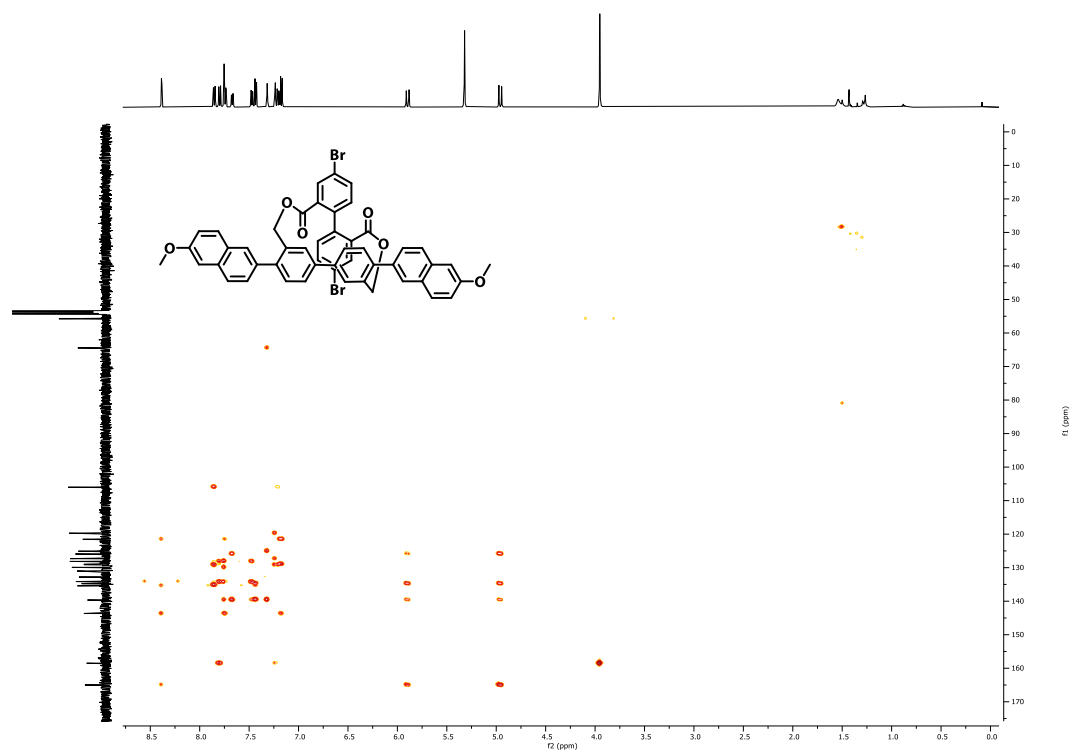

FT-IR spectrum of **C**<sub>Br2</sub>Naph2 (neat)

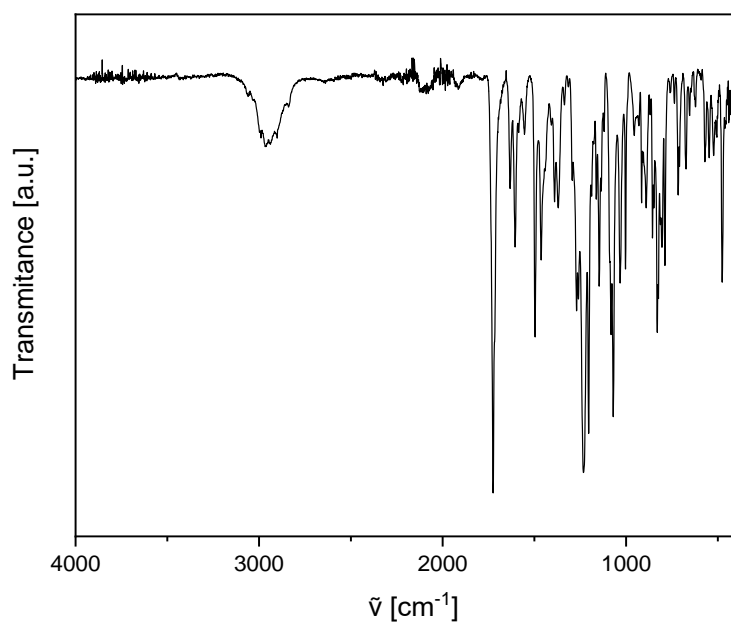

HR-ESI-MS spectrum of  $C_{Br_2}Naph_2$

High Resolution Mass Spectrometry Report

Sample Name COA027  
Comment

Instrument maXis 4G  
Method ms\_nocolumn\_high\_pos\_use\_acn.m

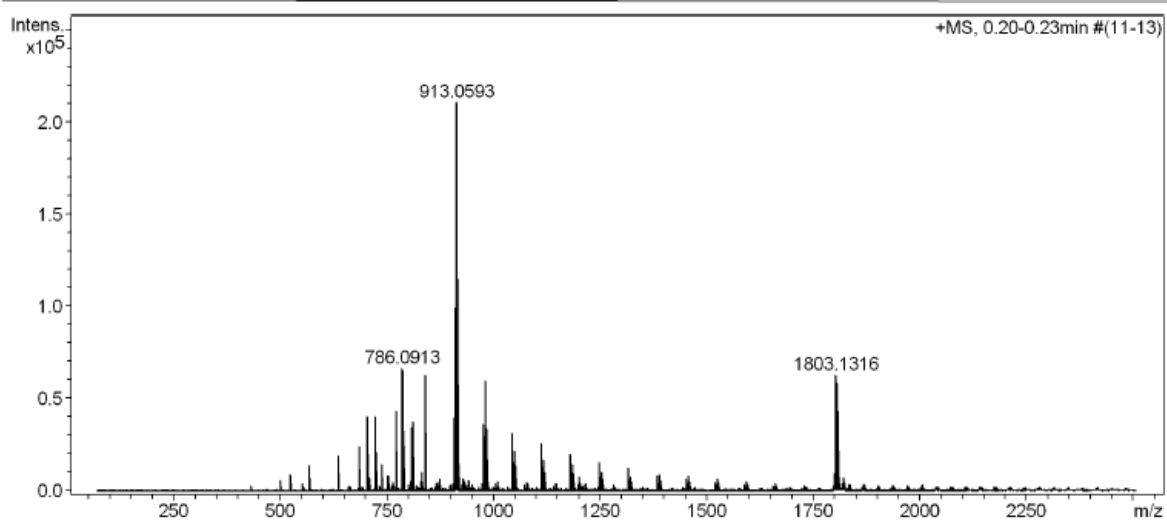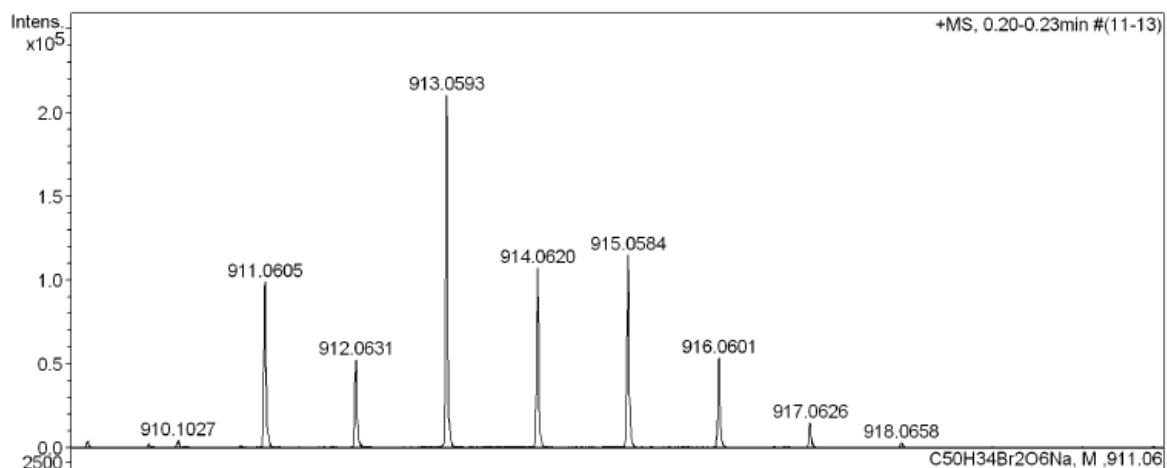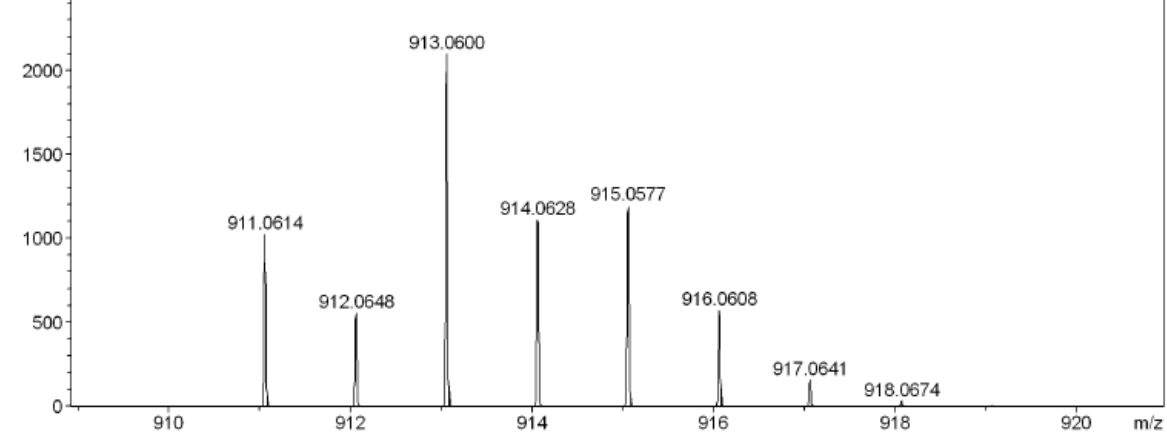

**<sup>1</sup>H-NMR spectrum of C<sub>Naph4</sub> in THF-d<sub>8</sub>**

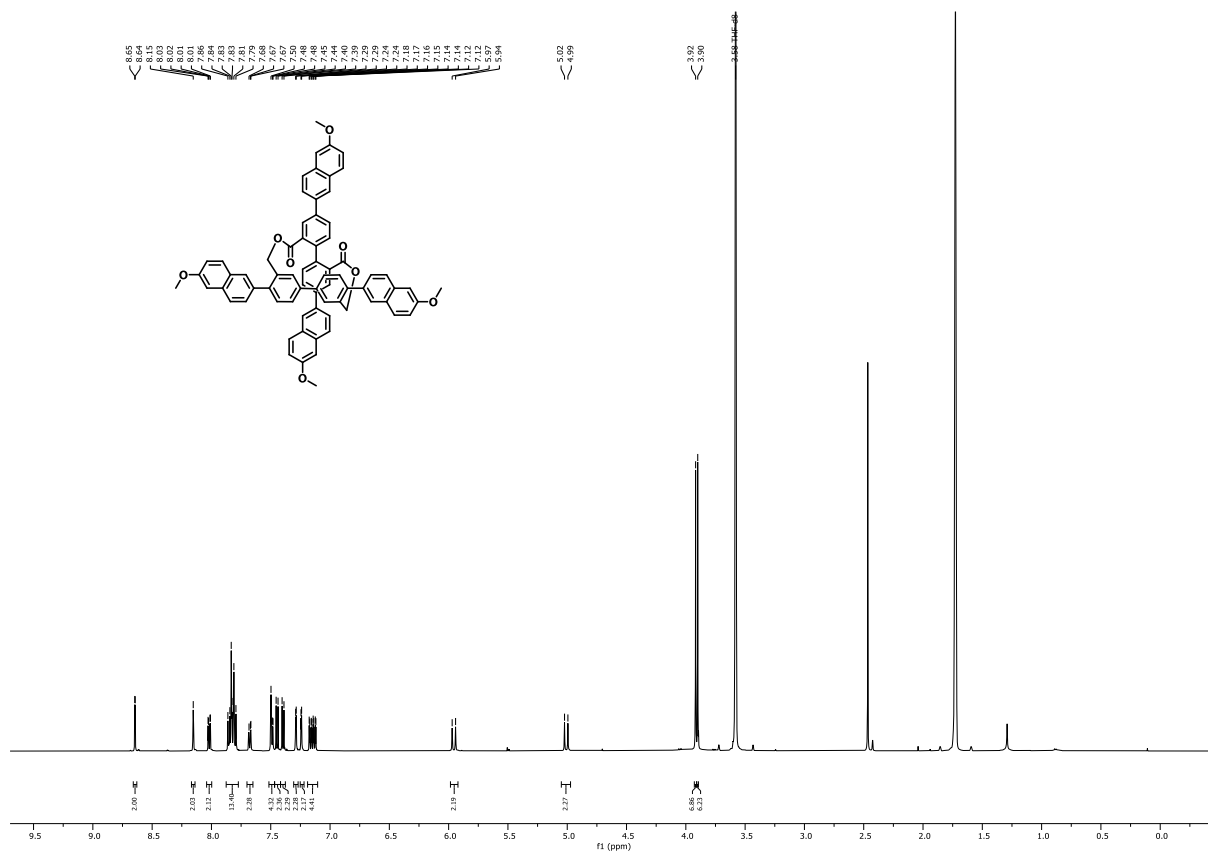

**<sup>13</sup>C-NMR spectrum of C<sub>Naph4</sub> in THF-d<sub>8</sub>**

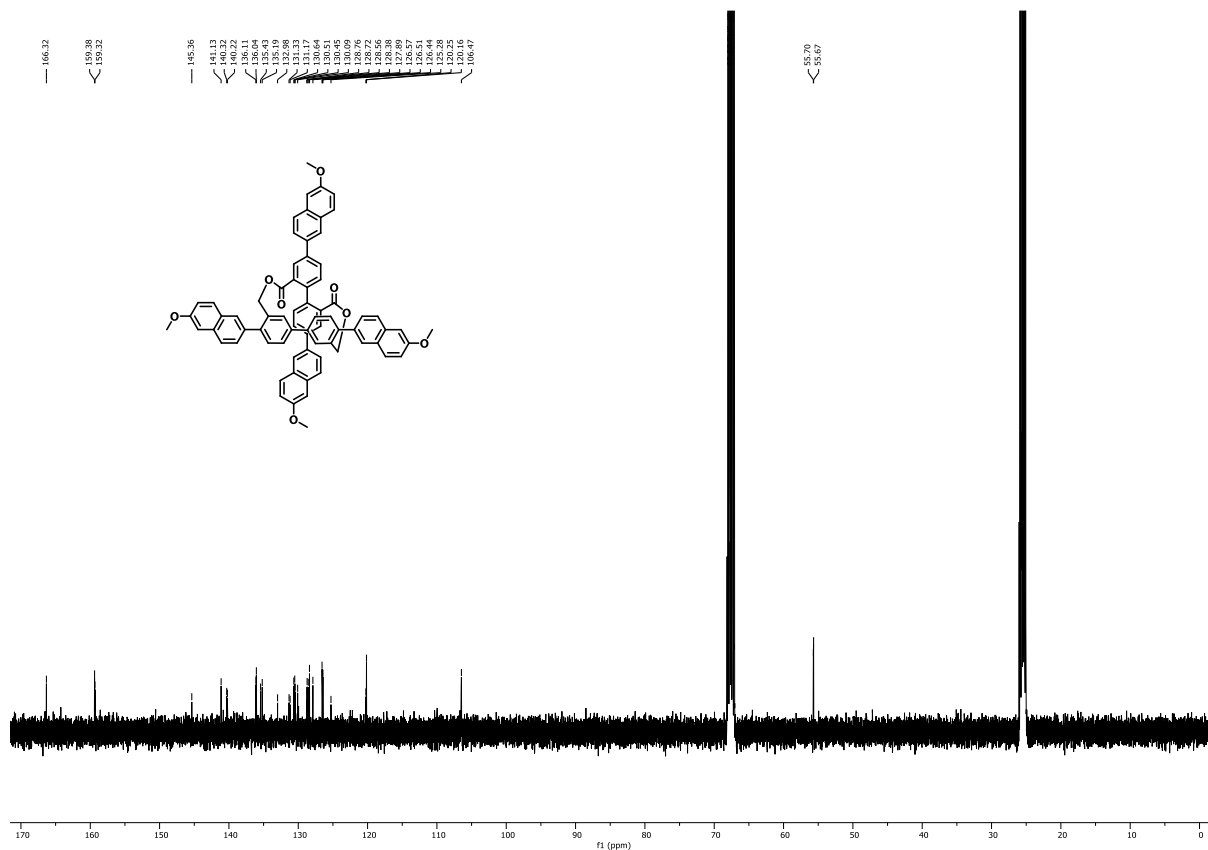

### COSY spectrum of $C_{Naph4}$ in THF-d8

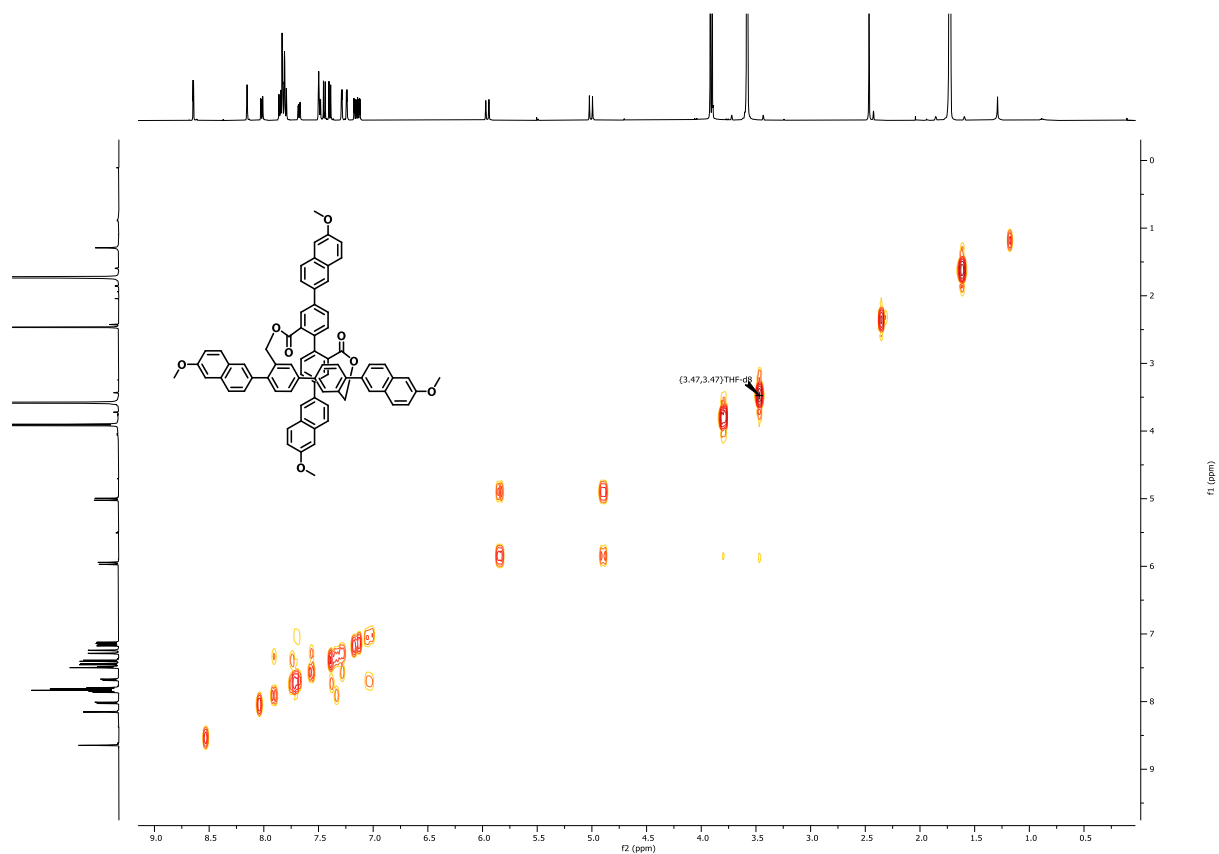

### HMQC spectrum of $C_{Naph4}$ in THF-d8

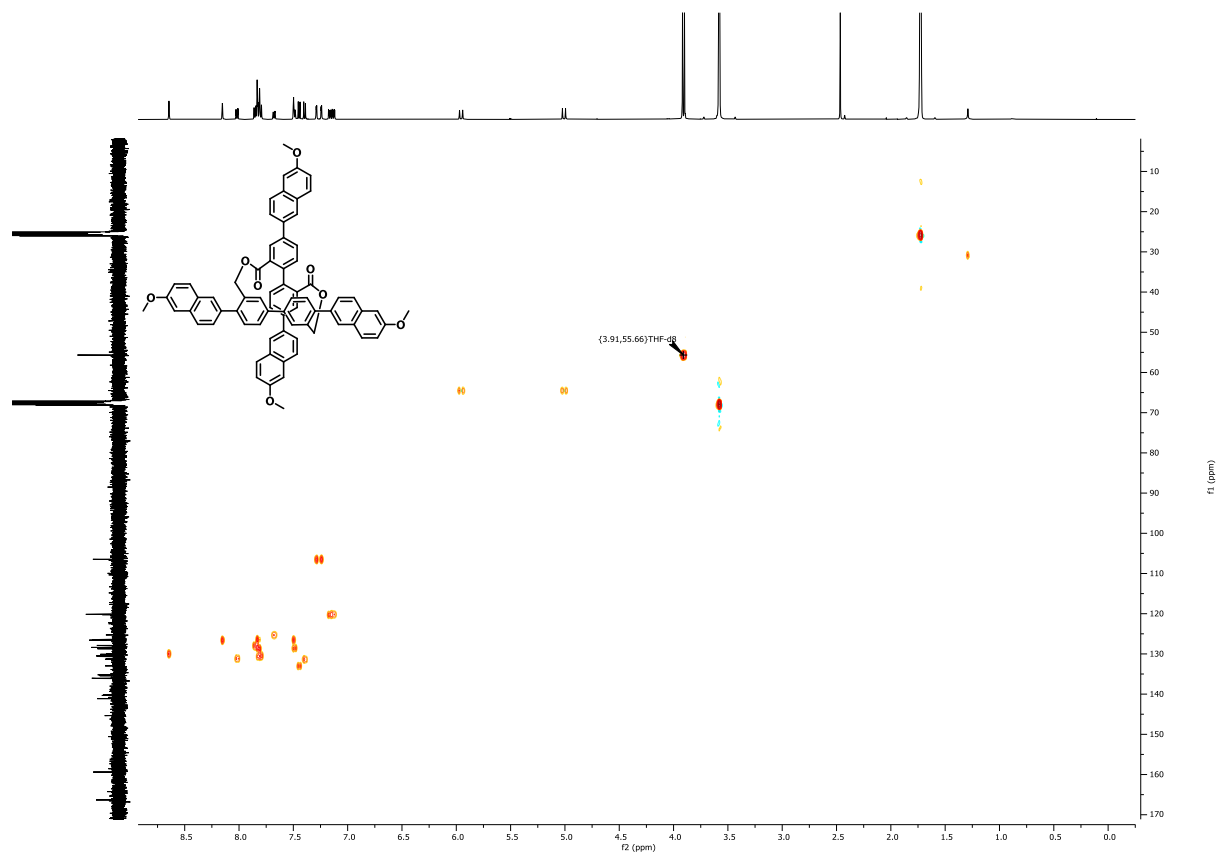

# HMBC spectrum of $C_{Naph4}$ in THF-d8

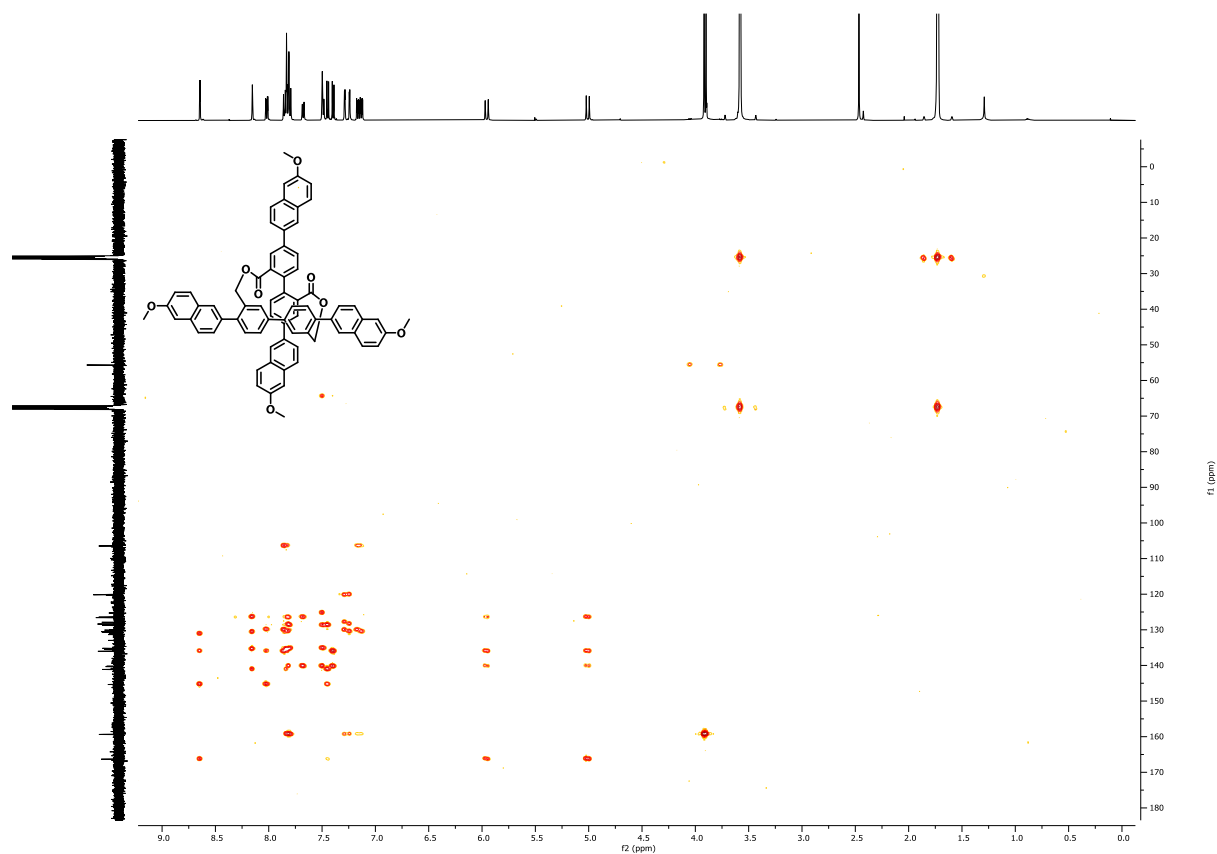

# $^{13}C$ -DEPT spectrum of $C_{Naph4}$ in THF-d8

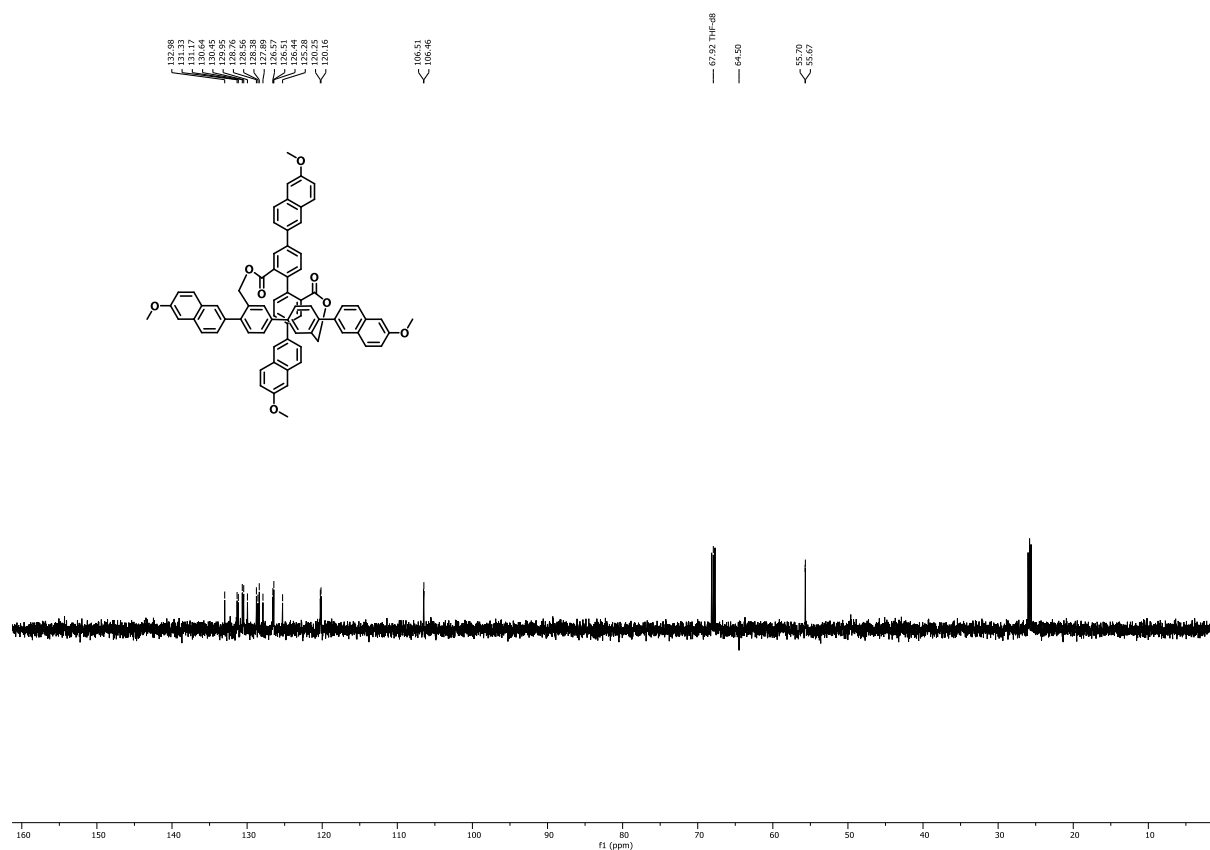

FT-IR spectrum of **C<sub>Naph4</sub>** (neat)

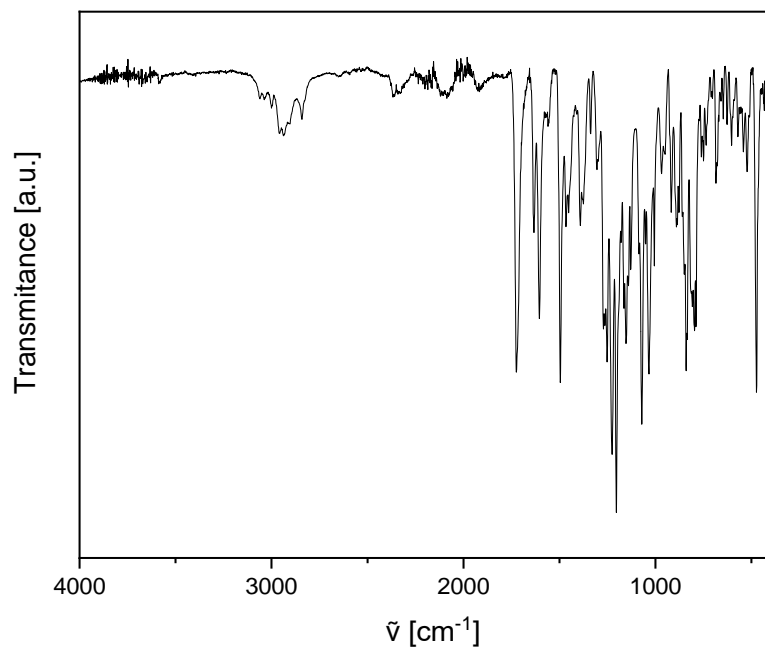



# HR-ESI-MS spectrum of C<sub>Naph4</sub>

## High Resolution Mass Spectrometry Report

Sample Name **COA 031 product**  
Comment

Instrument **maXis 4G**  
Method **ms\_nocolumn\_mid\_pos.m**

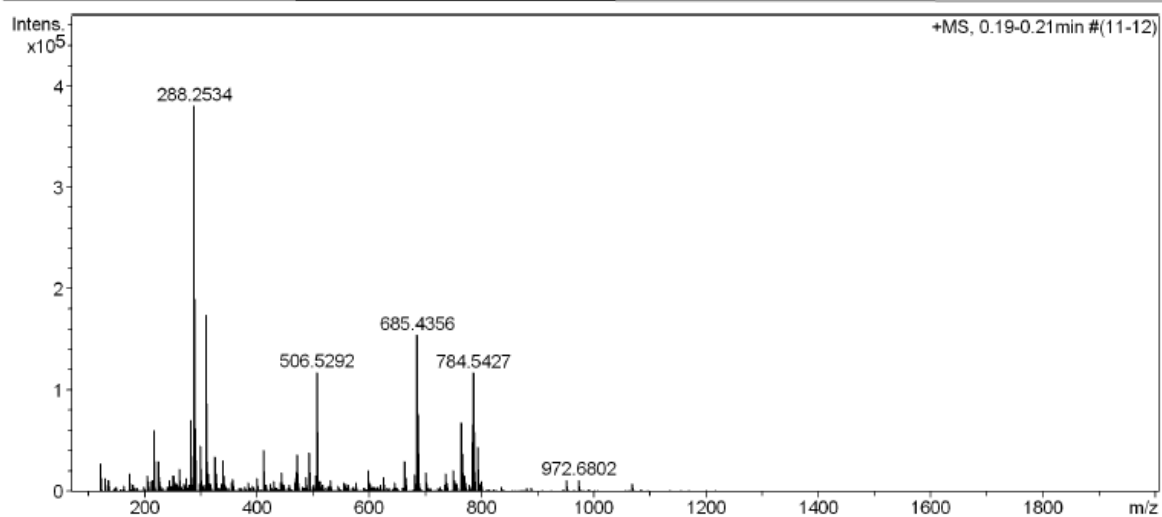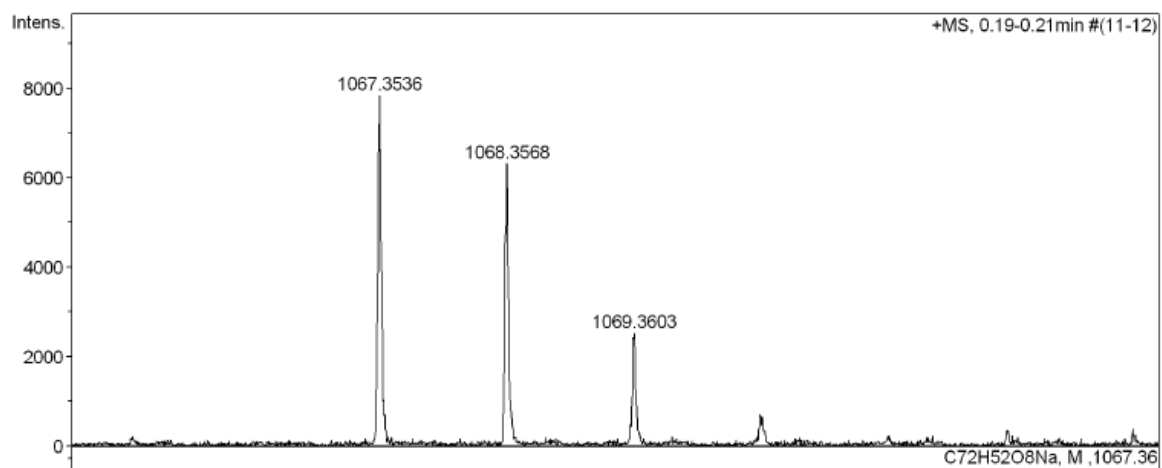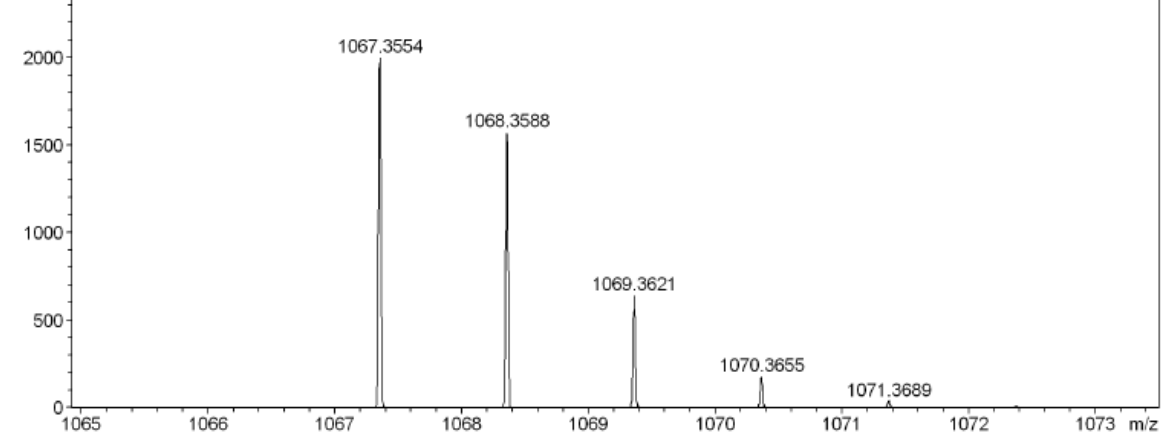



<sup>13</sup>C-Dept spectrum of C<sub>Br2</sub>Ni<sub>2</sub> in CD<sub>2</sub>Cl<sub>2</sub>

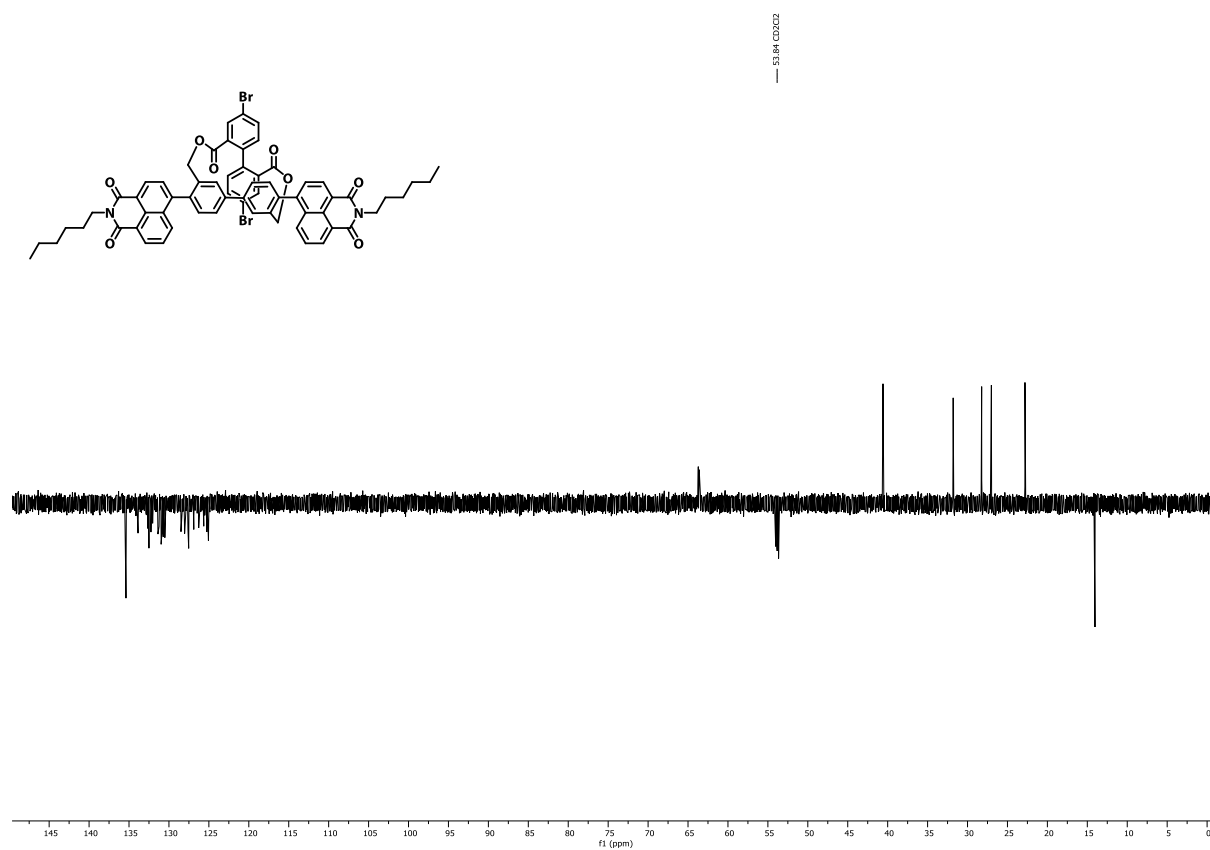

COSY spectrum of C<sub>Br2</sub>Ni<sub>2</sub> in CD<sub>2</sub>Cl<sub>2</sub>

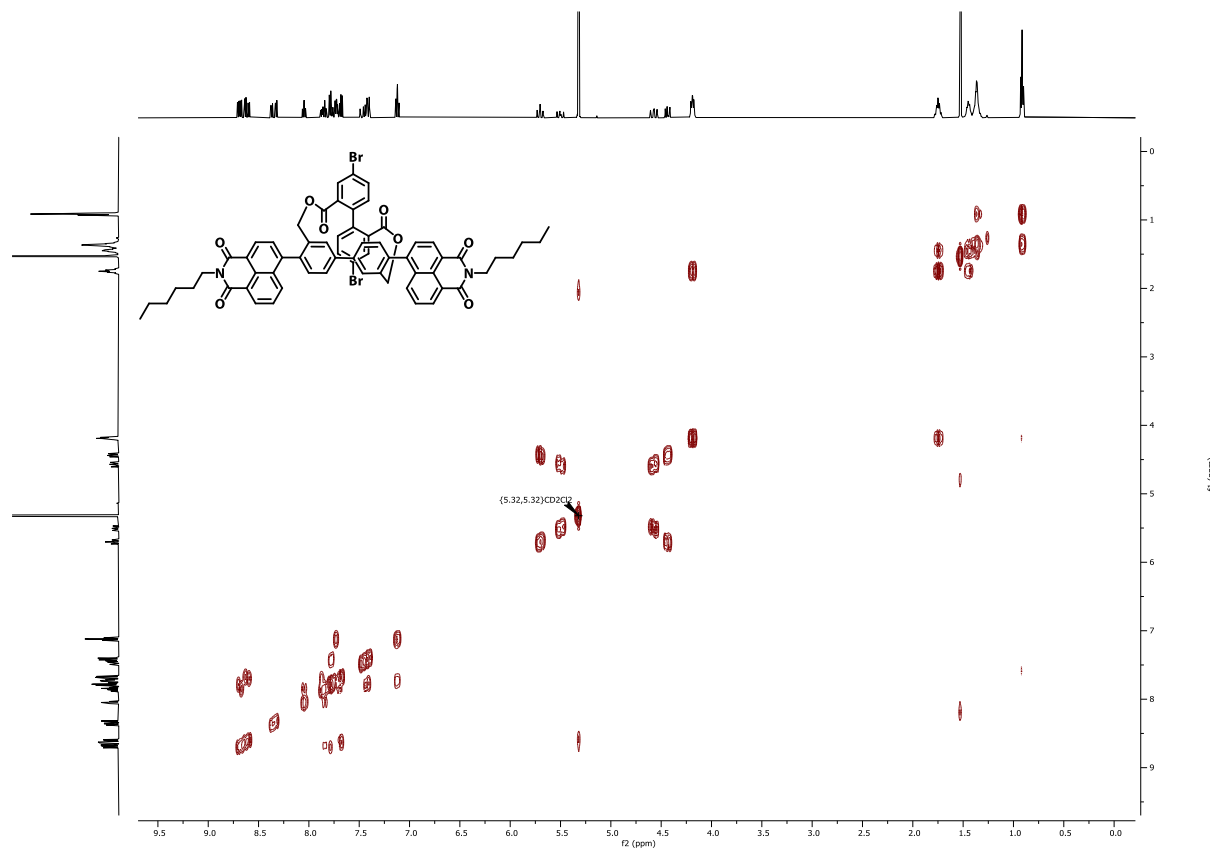

### HMQC spectrum of $C_{Br_2NI_2}$ in $CD_2Cl_2$

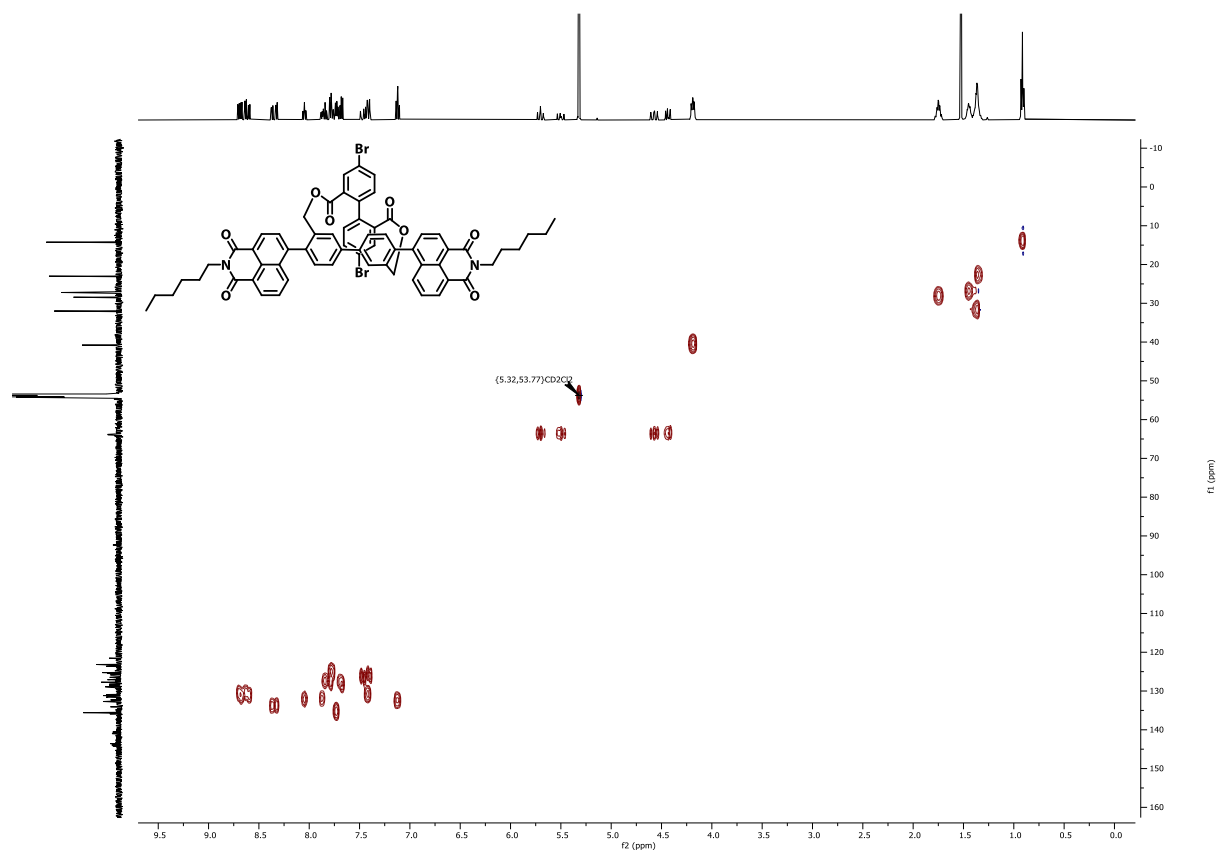

### HMBC spectrum of $C_{Br_2NI_2}$ in $CD_2Cl_2$

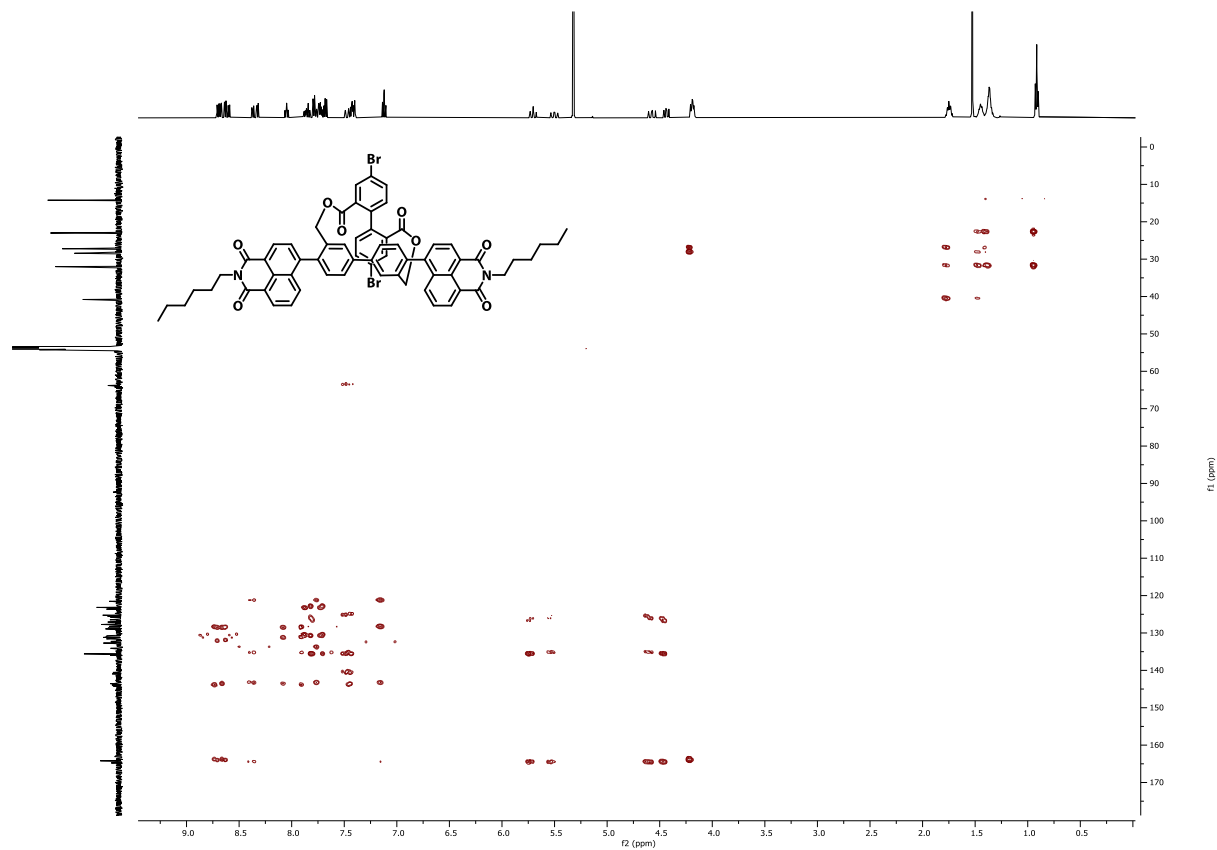

NOESY spectrum of  $C_{Br_2NI_2}$  in  $CD_2Cl_2$

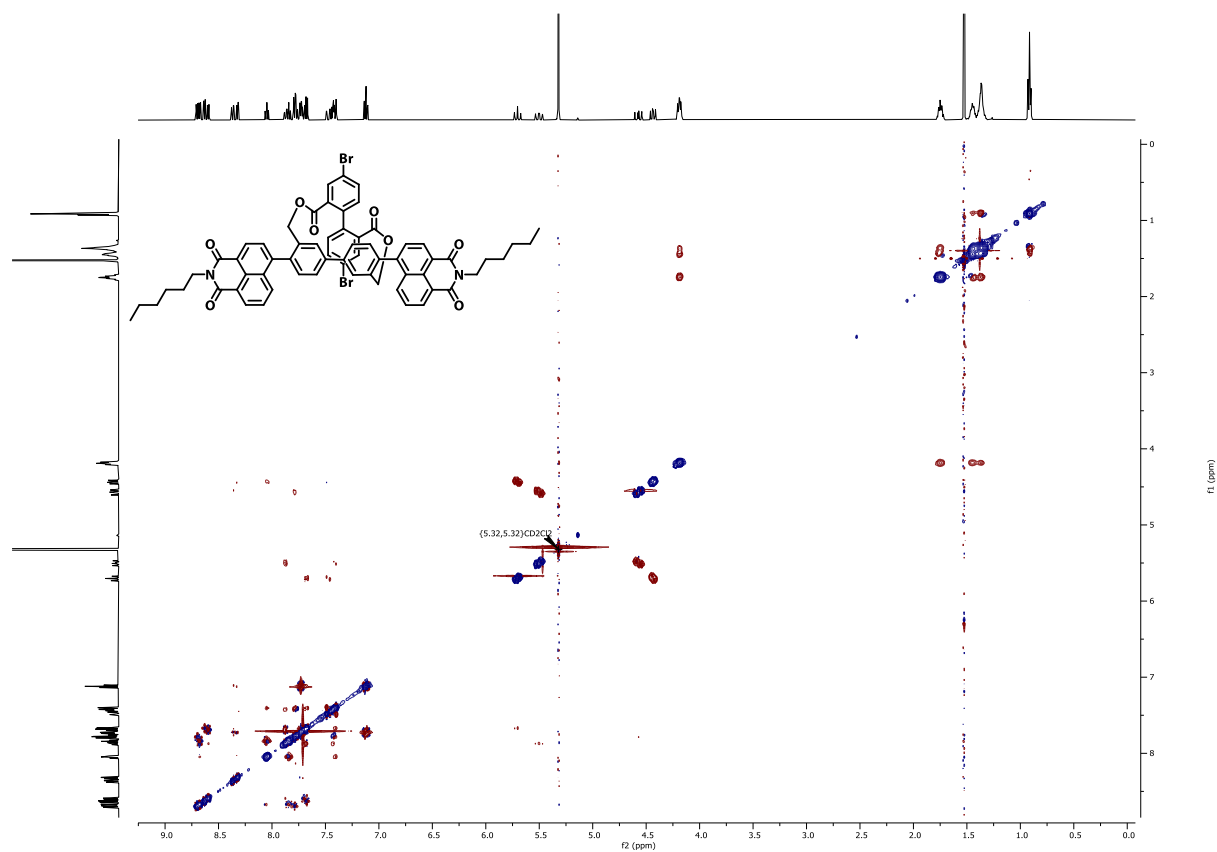

FT-IR spectrum of  $C_{Br_2NI_2}$  (neat)

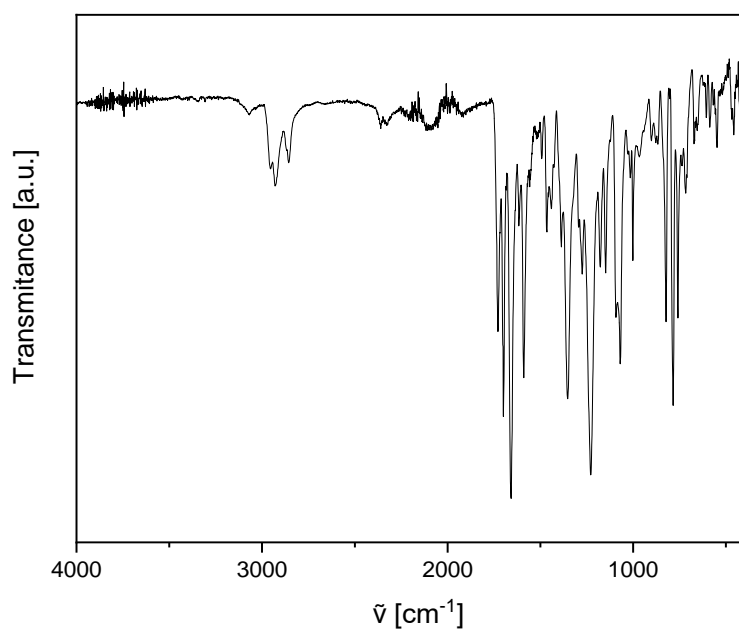

HR-ESI-MS spectrum of  $C_{Br_2NI_2}$

High Resolution Mass Spectrometry Report

Sample Name **KRO497-s5**  
Comment

Instrument **maXis 4G**  
Method **ms\_nocolumn\_600-3000\_pos.m**

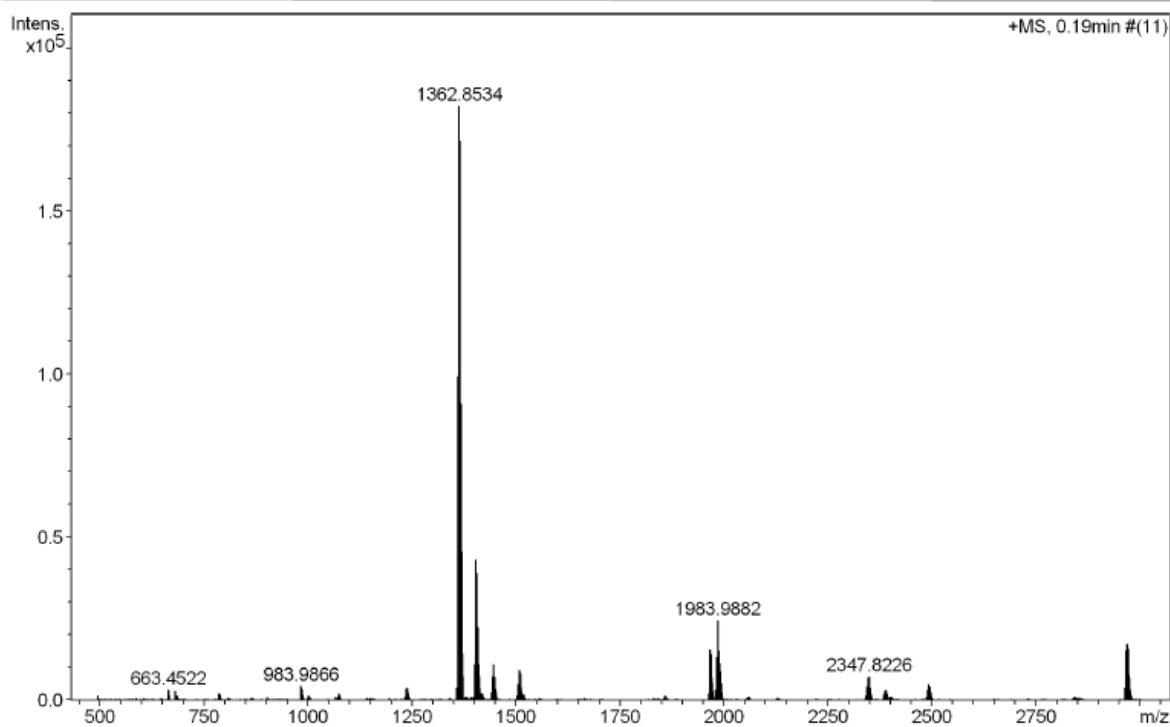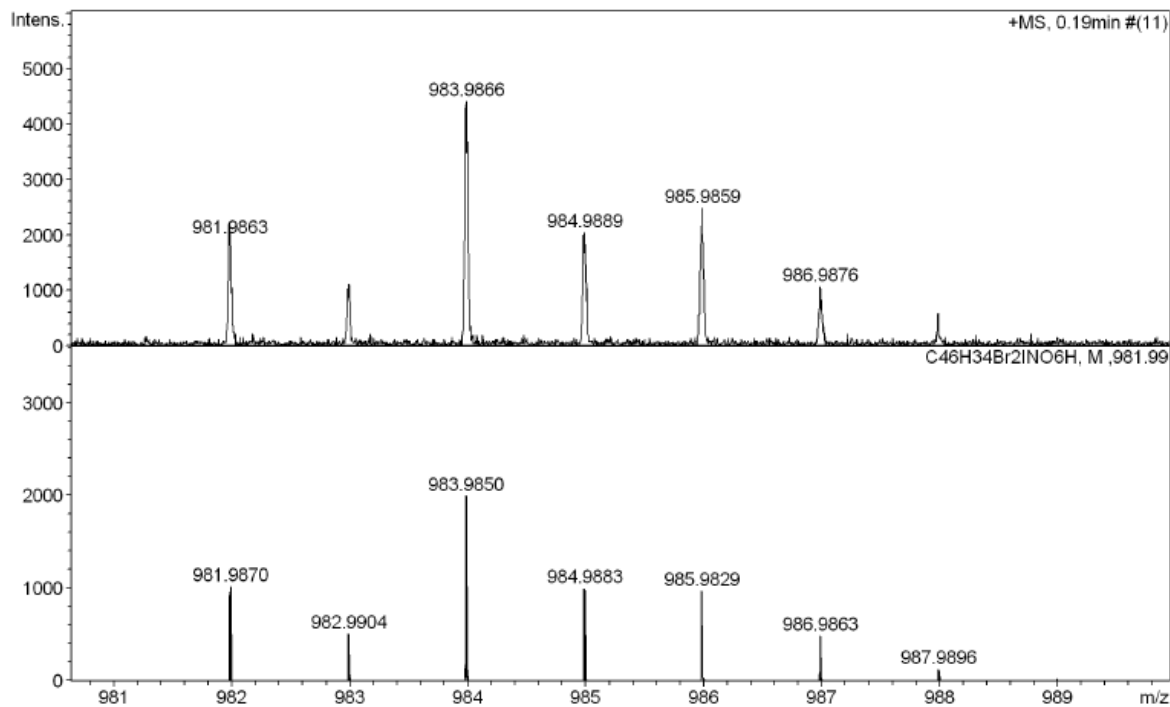

<sup>1</sup>H-NMR spectrum of C<sub>Ni4</sub> in CD<sub>2</sub>Cl<sub>2</sub>

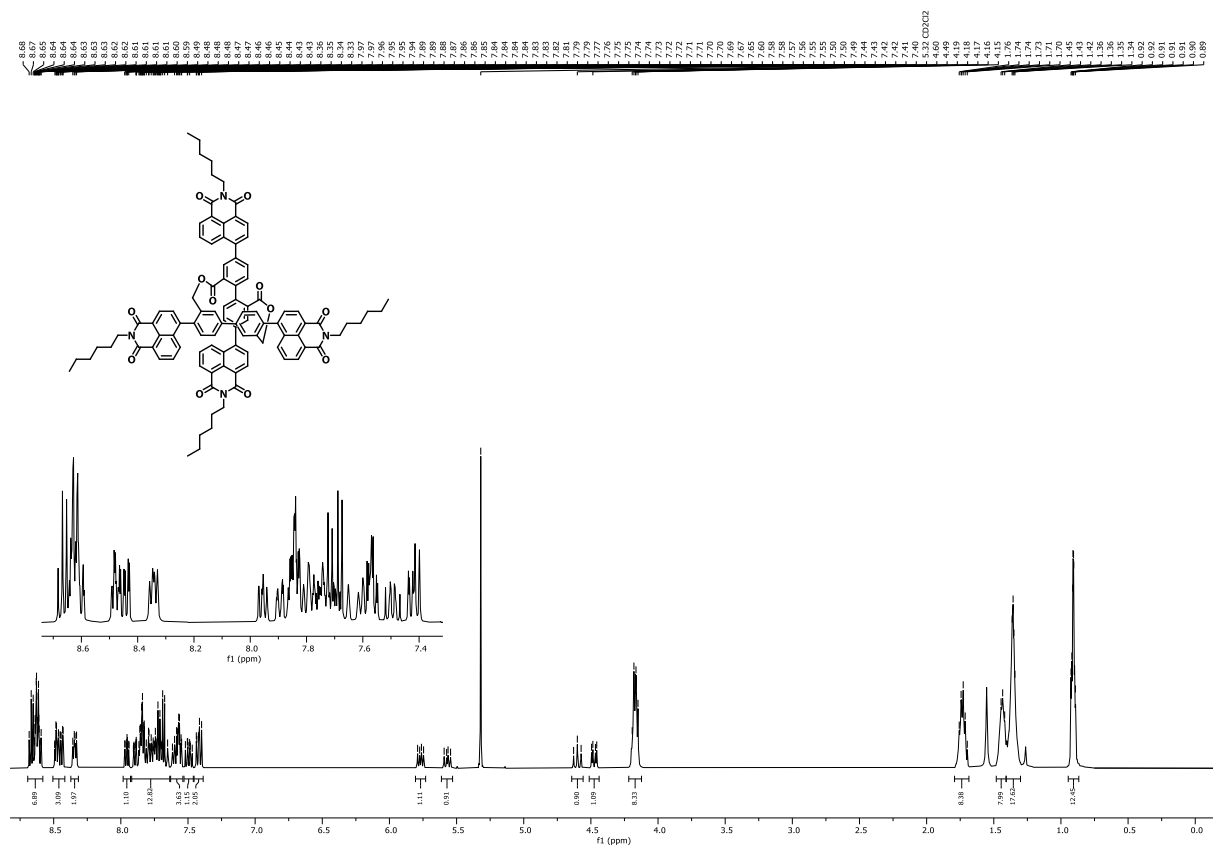

**<sup>13</sup>C-Dept spectrum of C<sub>NI4</sub> in CD<sub>2</sub>Cl<sub>2</sub>**

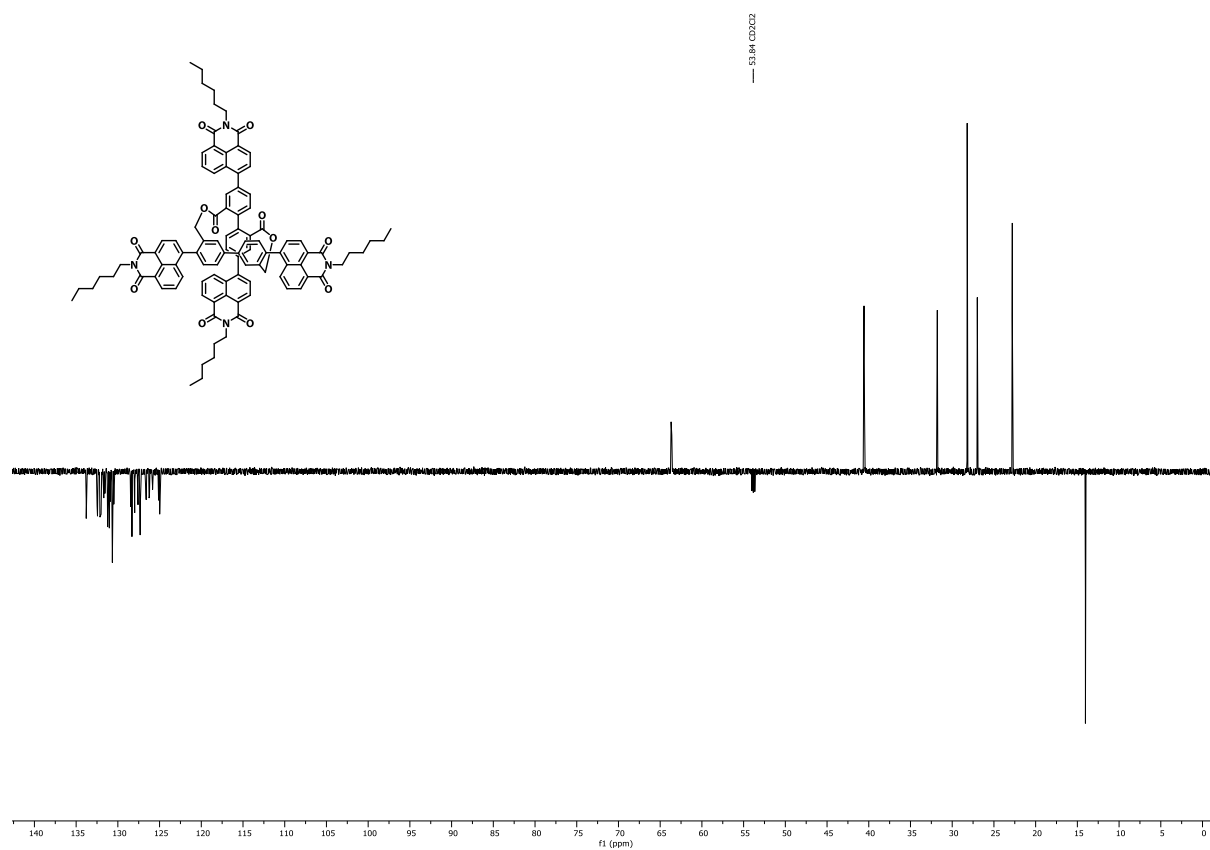

**COSY spectrum of C<sub>NI4</sub> in CD<sub>2</sub>Cl<sub>2</sub>**

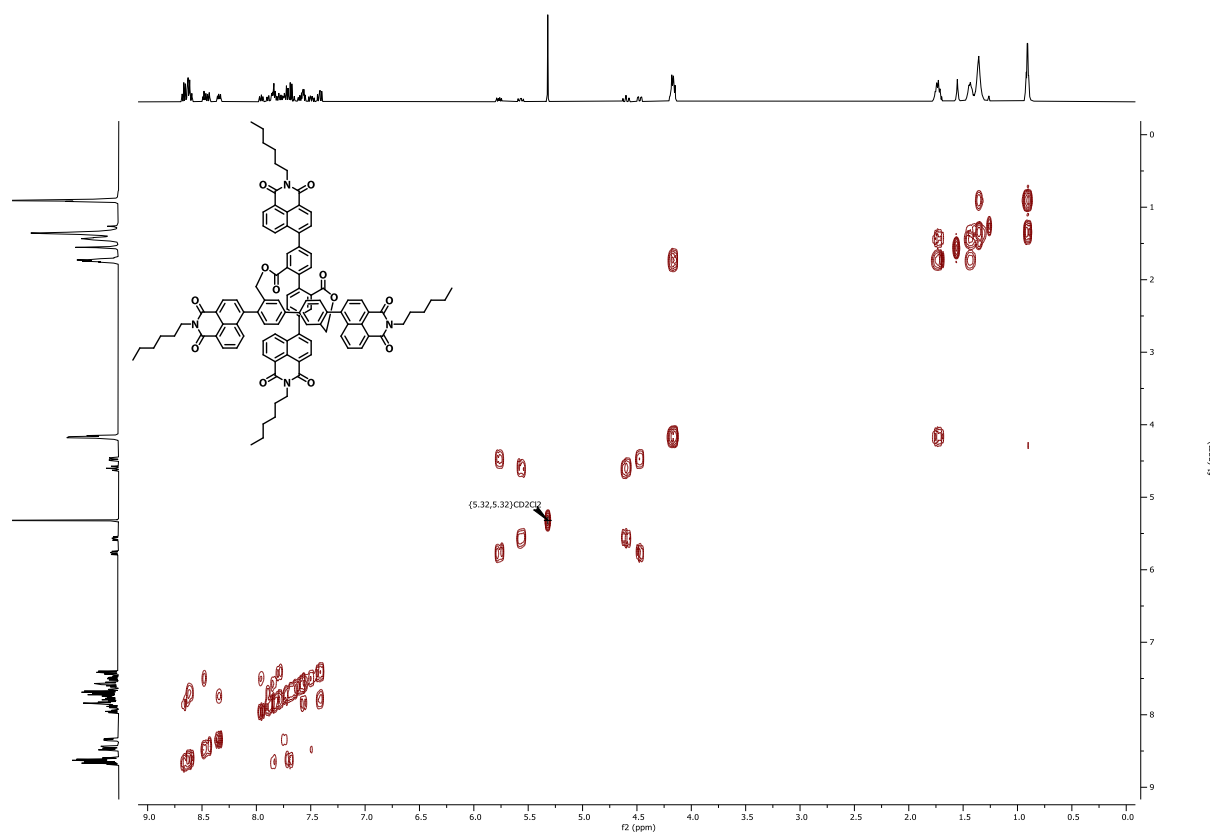



### HMQC spectrum of $C_{Ni4}$ in $CD_2Cl_2$

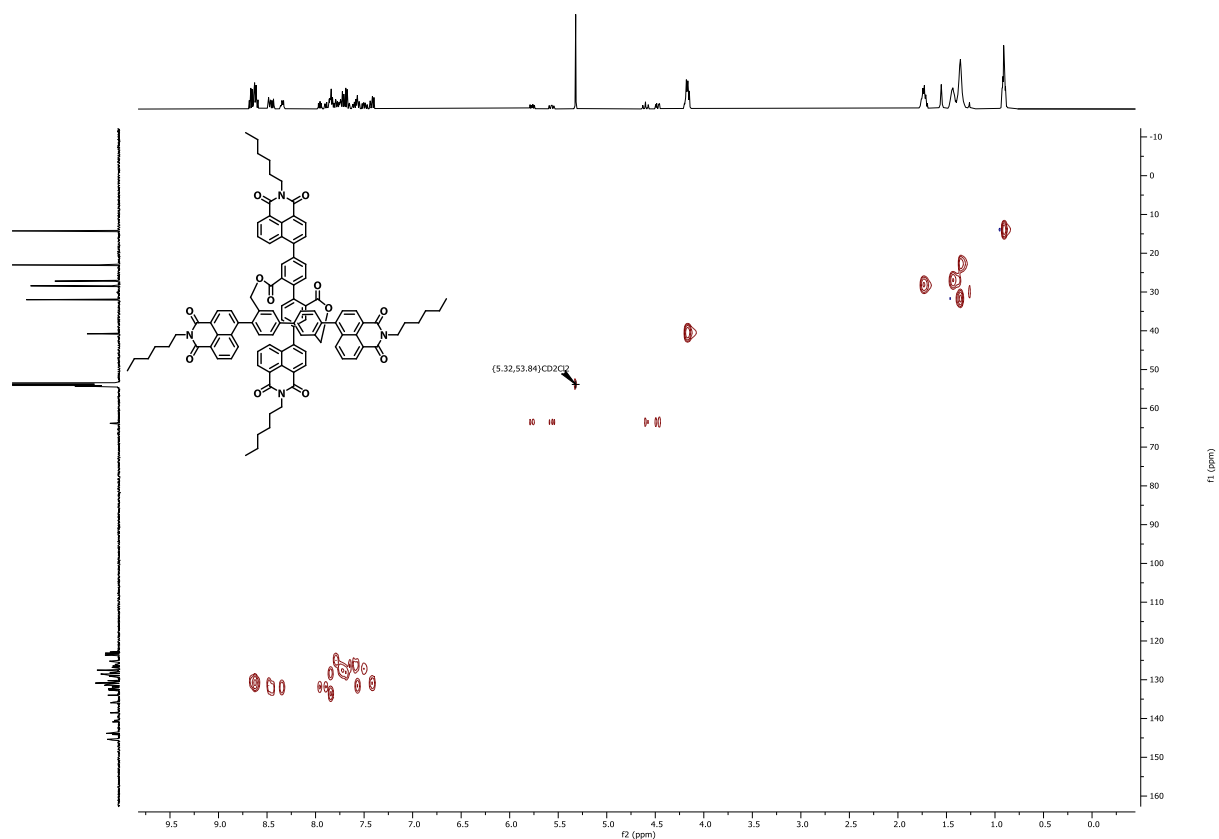

### HMBC spectrum of $C_{Ni4}$ in $CD_2Cl_2$

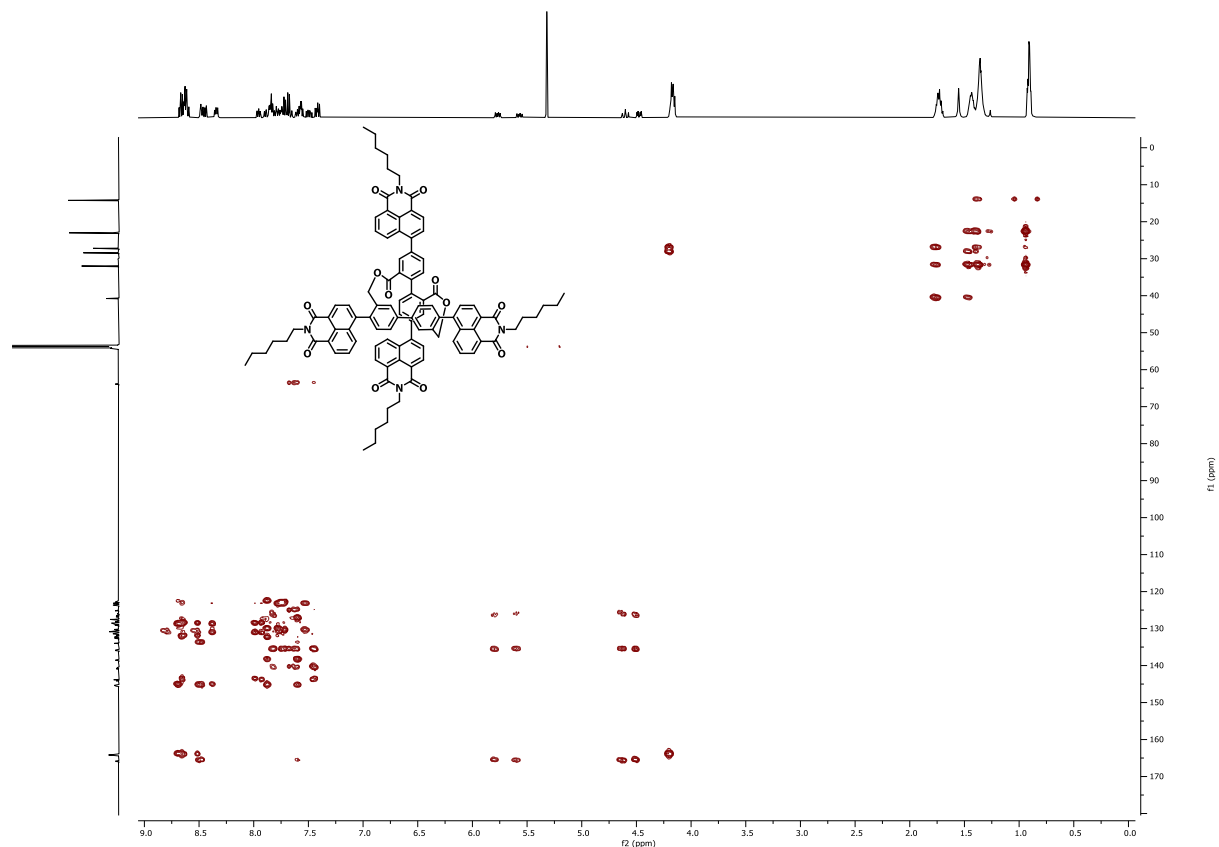

NOESY spectrum of  $C_{NI4}$  in  $CD_2Cl_2$

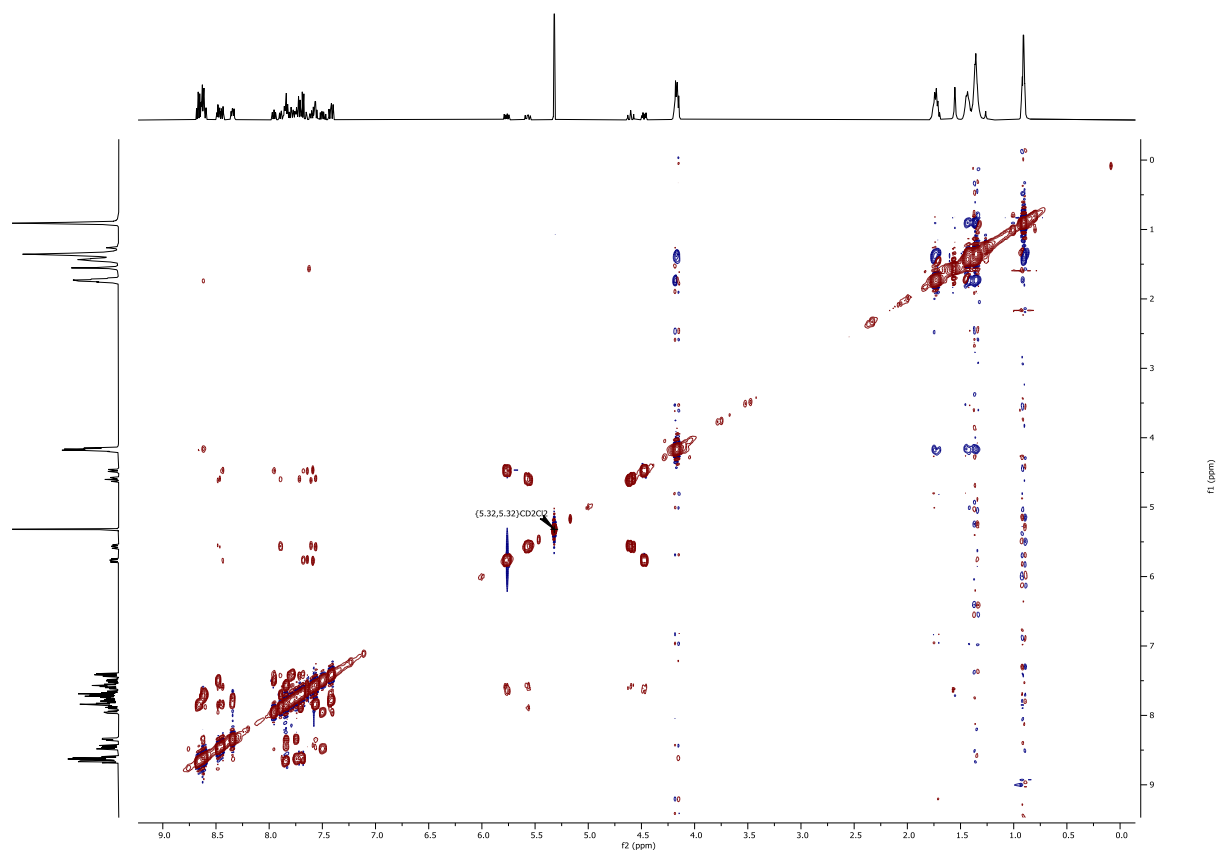

FT-IR spectrum of  $C_{NI4}$  (neat)

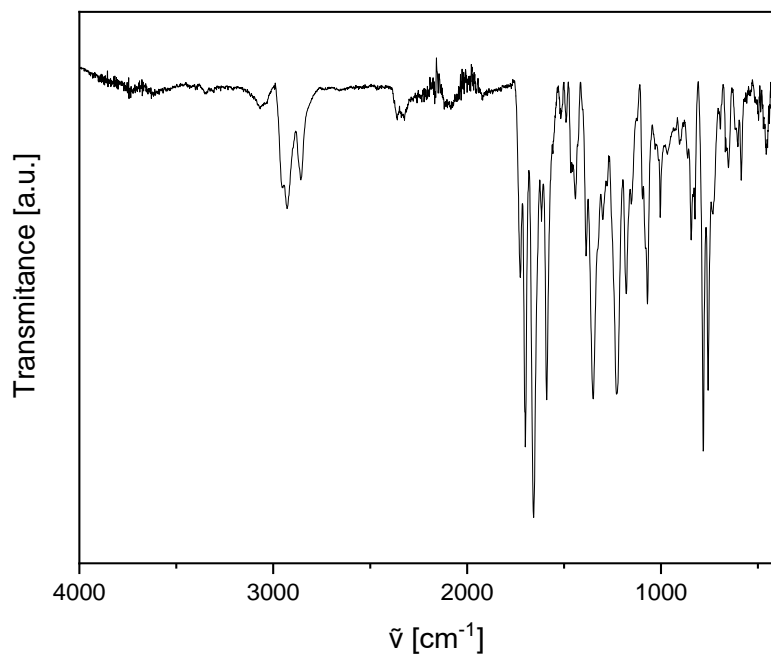

# HR-ESI-MS spectrum of C<sub>Ni4</sub>

## High Resolution Mass Spectrometry Report

Sample Name **KRO482**  
Comment

Instrument **maXis 4G**  
Method **ms\_nocolumn\_high\_pos\_use\_acn.m**

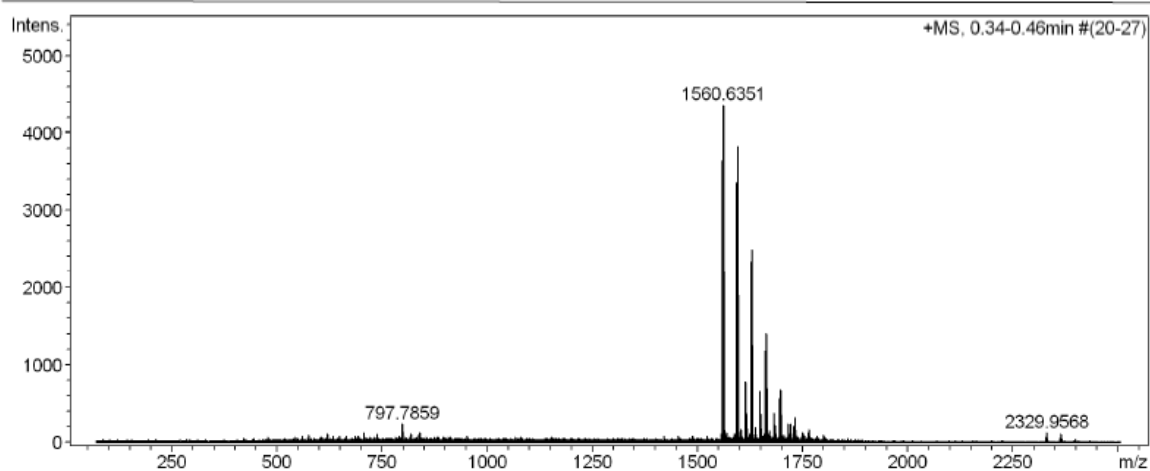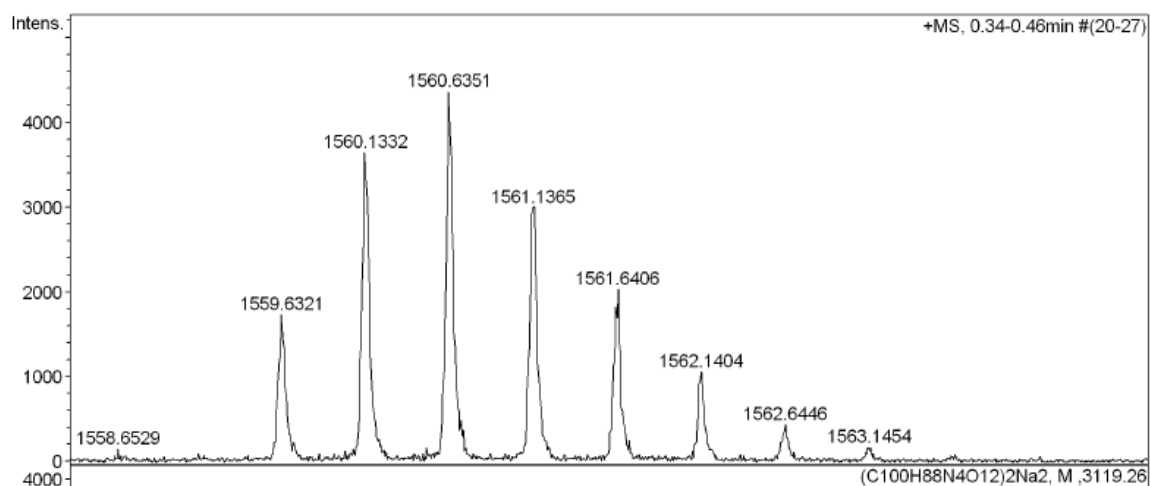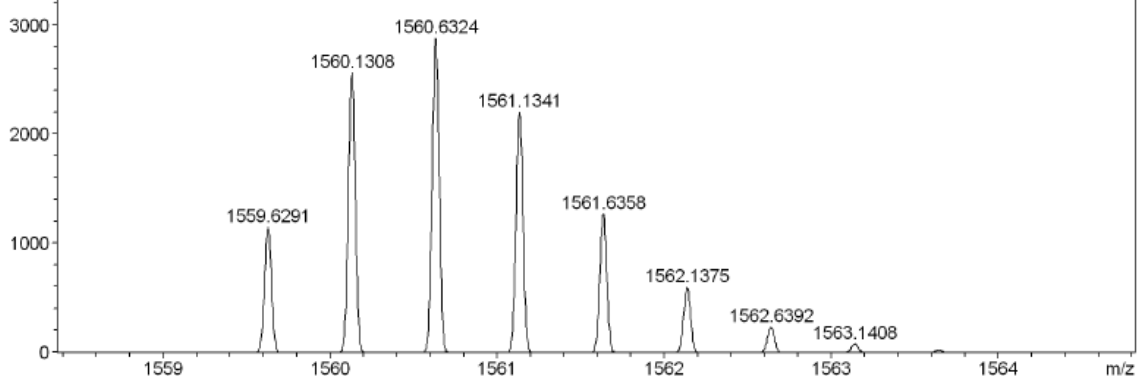

**<sup>1</sup>H-NMR spectrum of C<sub>Br2</sub>BY<sub>2</sub> in CD<sub>2</sub>Cl<sub>2</sub>**

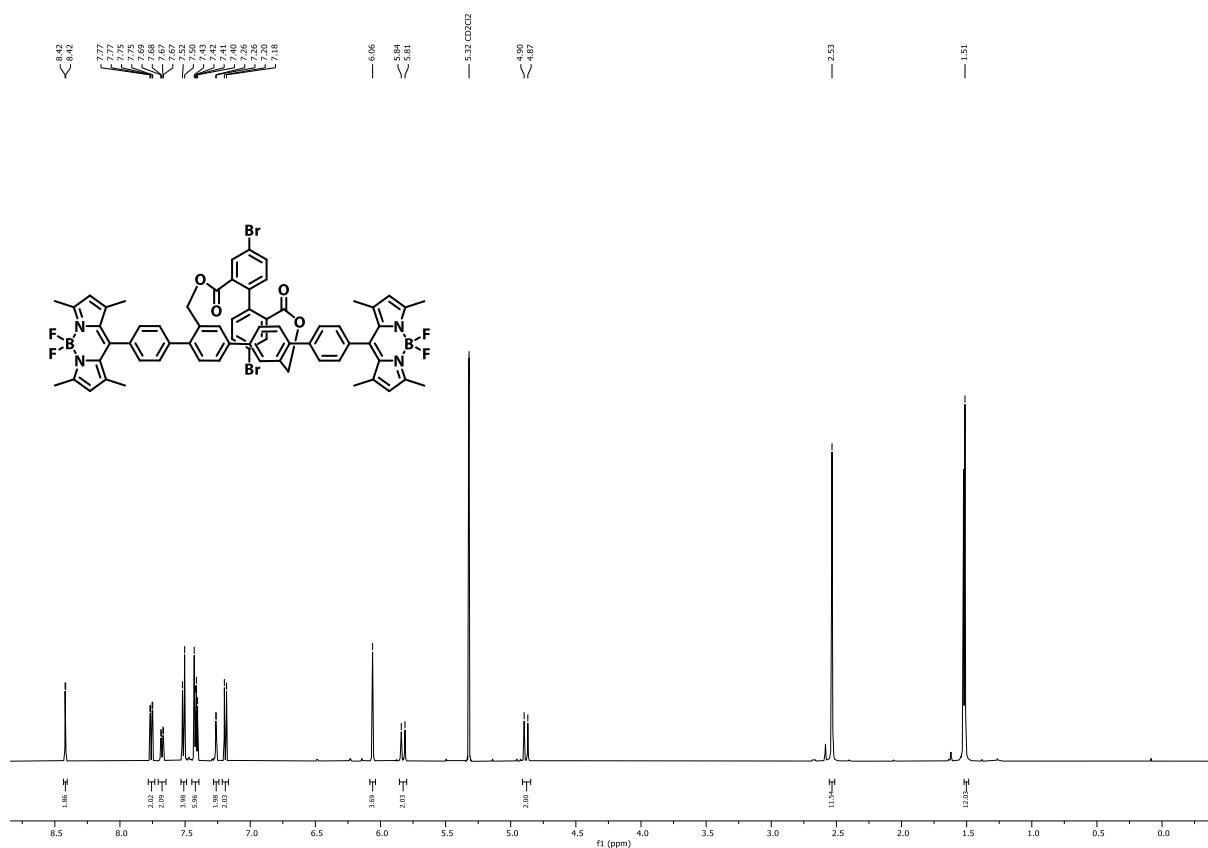

**<sup>13</sup>C-NMR spectrum of C<sub>Br2</sub>BY<sub>2</sub> in CD<sub>2</sub>Cl<sub>2</sub>**

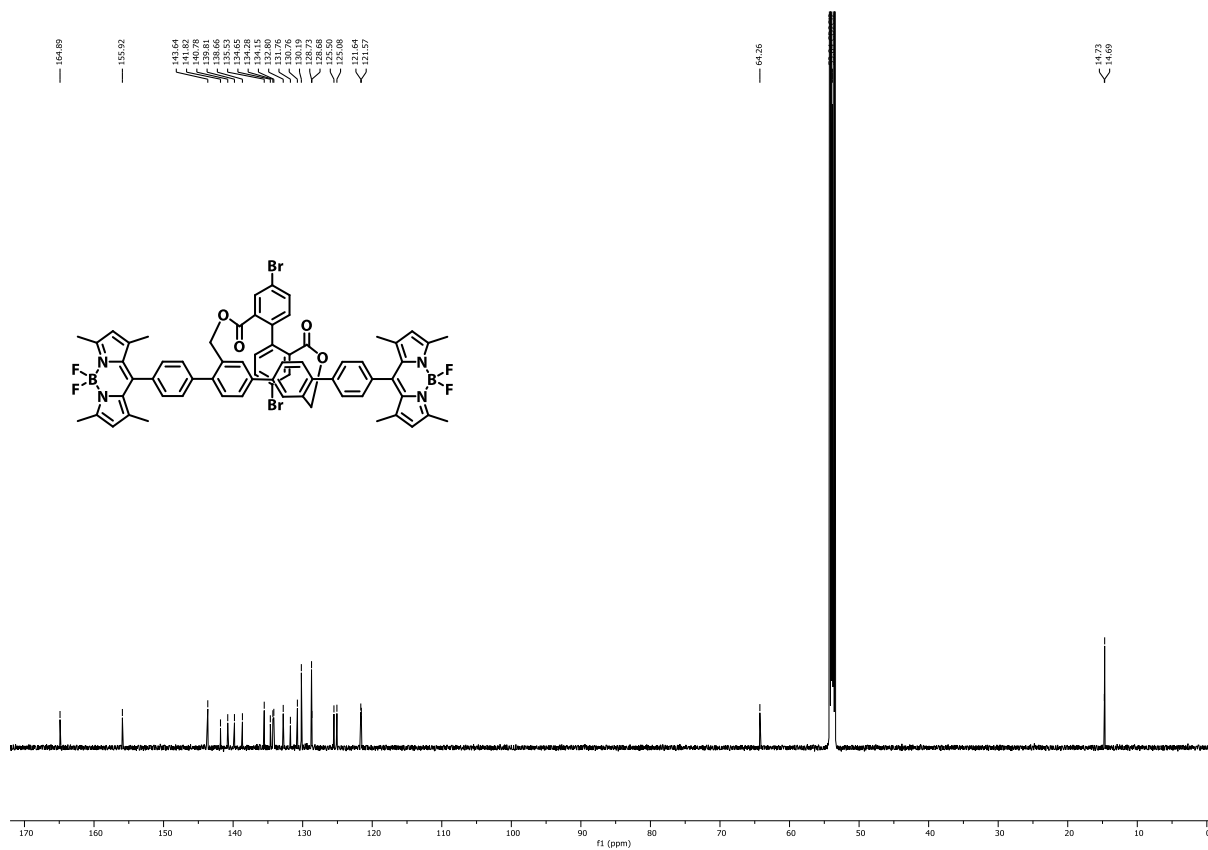

$^{13}\text{C}$ -Dept spectrum of  $\text{C}_{\text{Br}2\text{BY}2}$  in  $\text{CD}_2\text{Cl}_2$

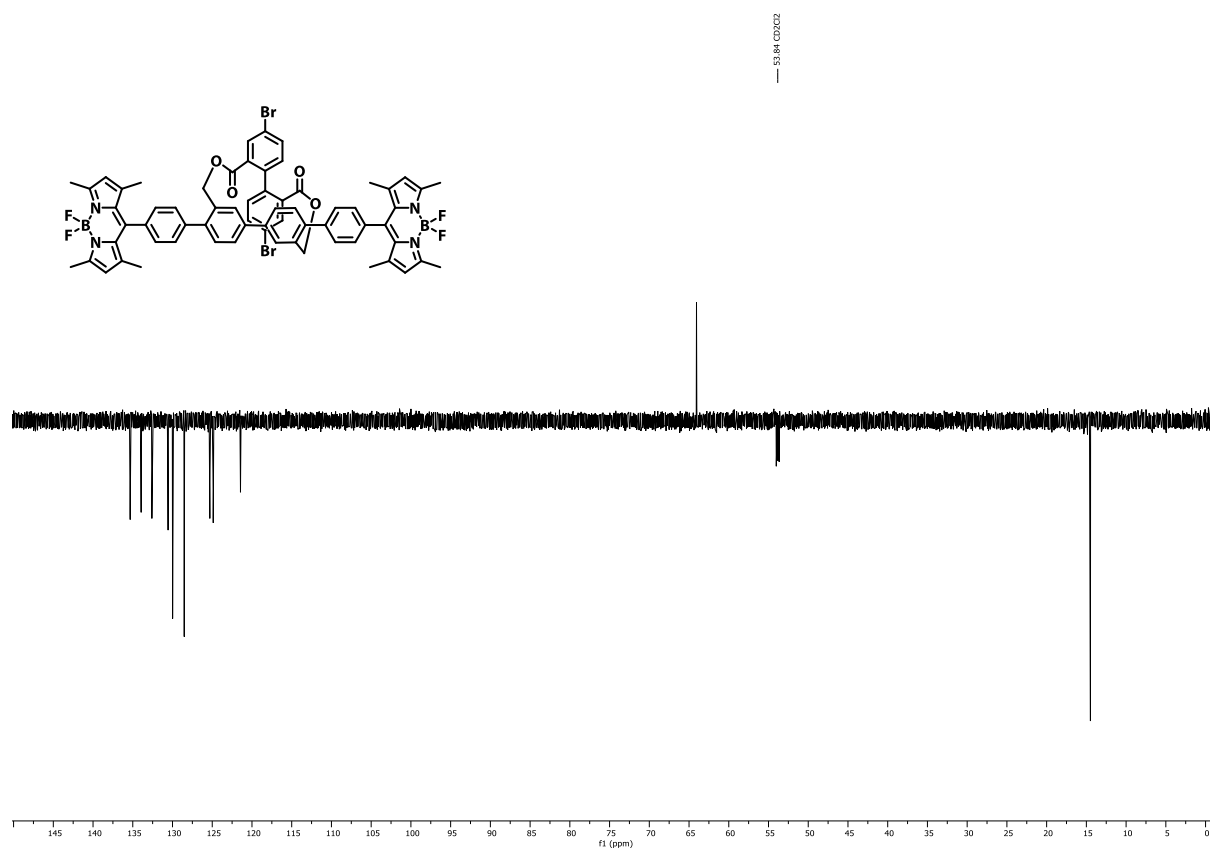

$^{19}\text{F}$ -NMR spectrum of  $\text{C}_{\text{Br}2\text{BY}2}$  in  $\text{CD}_2\text{Cl}_2$

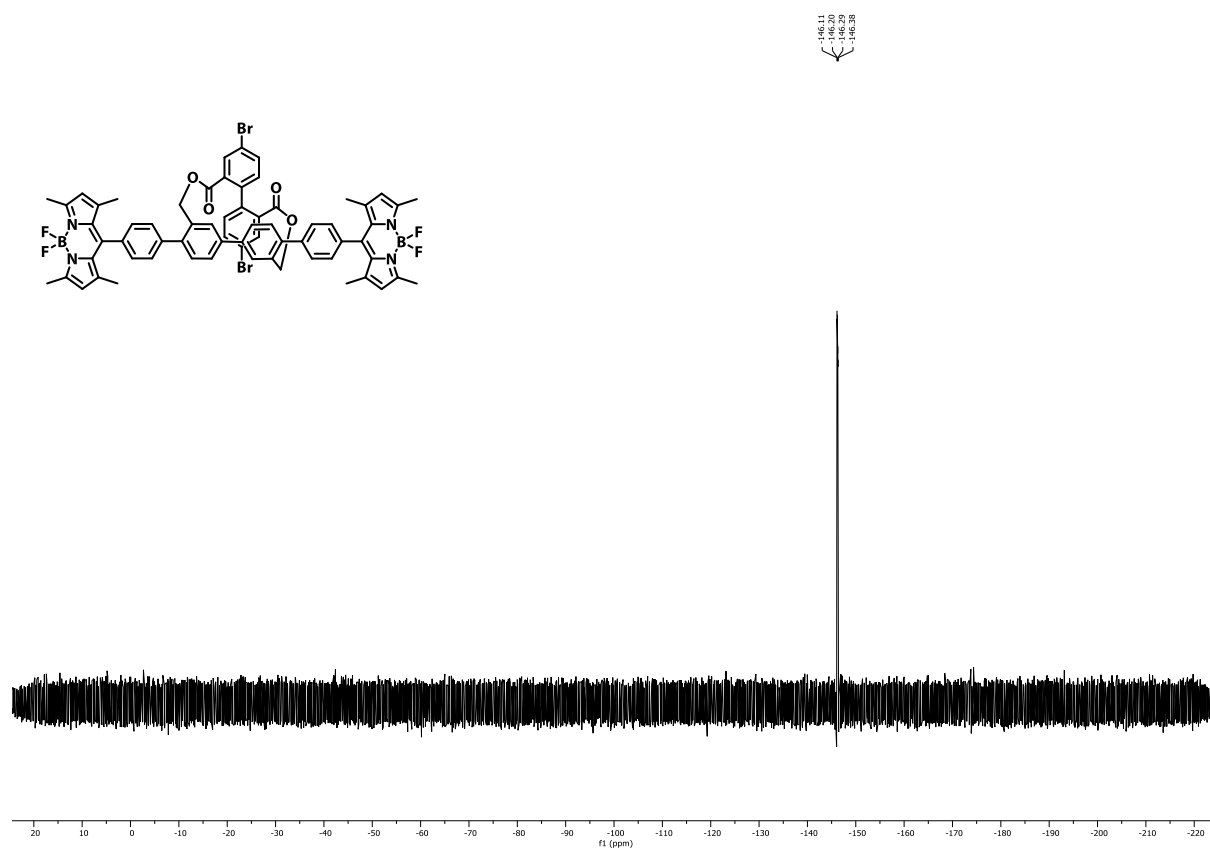

$^{11}\text{B}$ -NMR spectrum of  $\text{C}_{\text{Br}2\text{BY}2}$  in  $\text{CD}_2\text{Cl}_2$

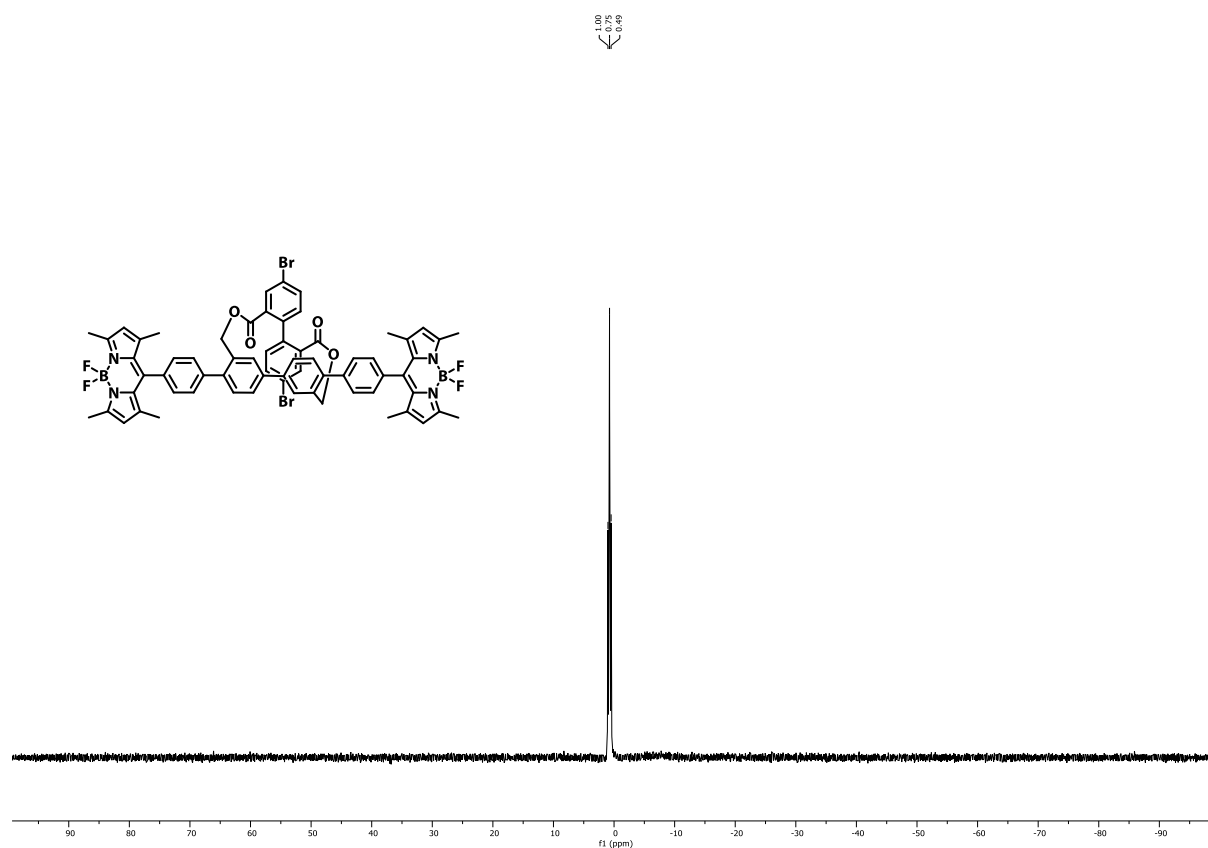

COSY spectrum of  $\text{C}_{\text{Br}2\text{BY}2}$  in  $\text{CD}_2\text{Cl}_2$

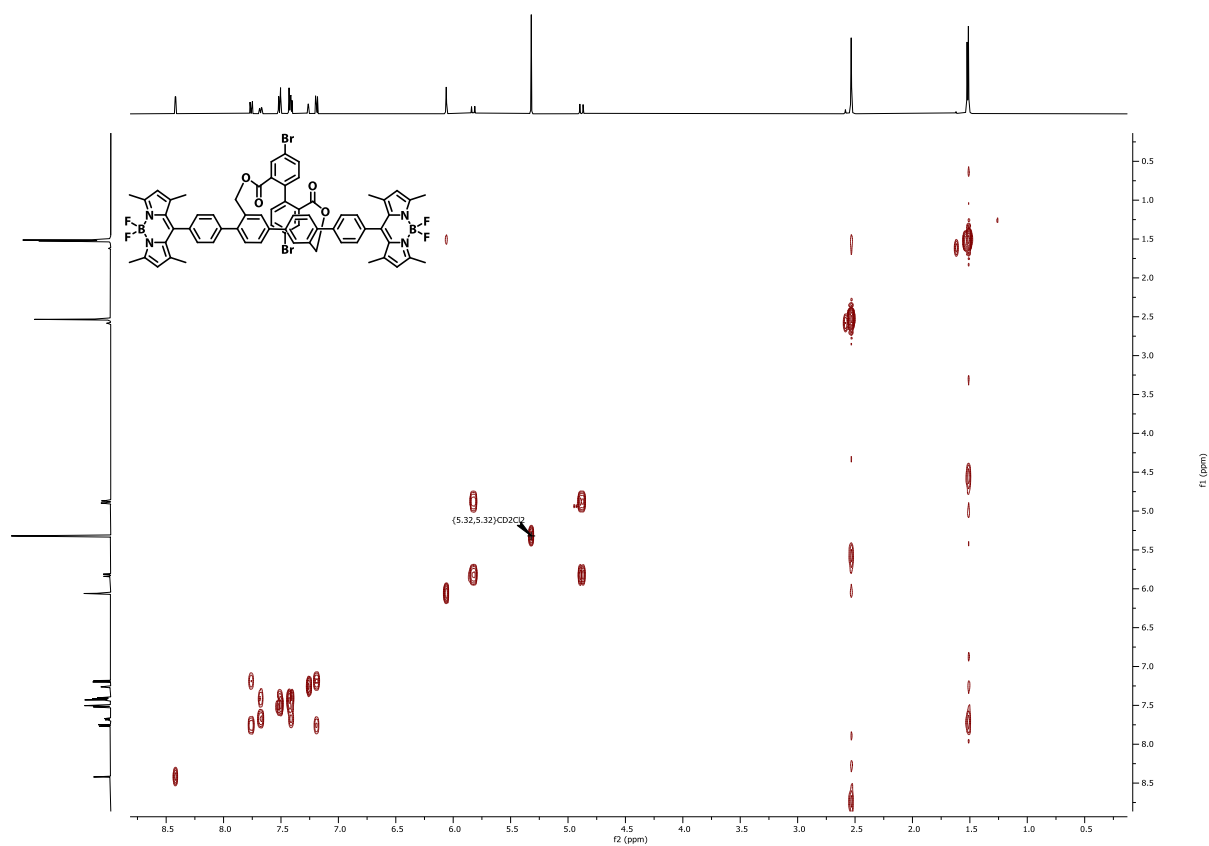

### HMQC spectrum of $C_{Br_2BY_2}$ in $CD_2Cl_2$

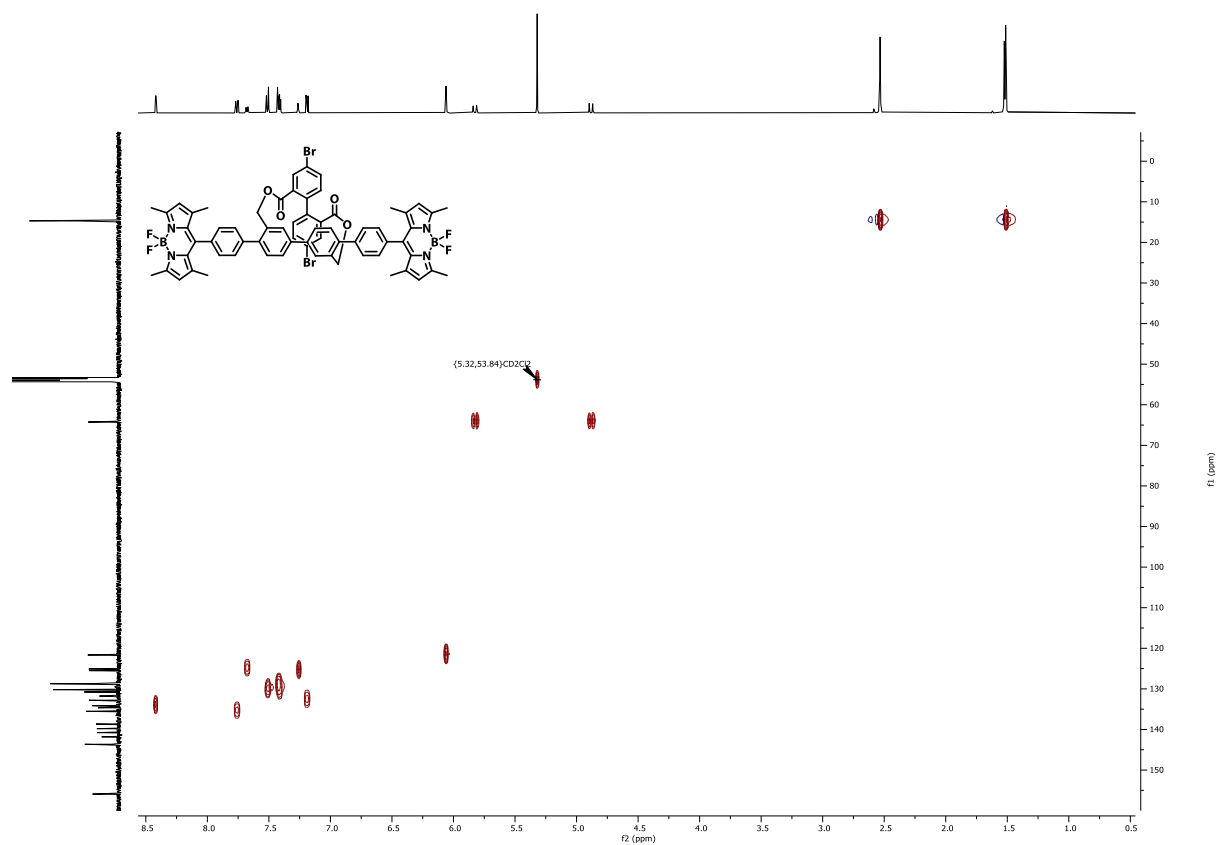

### HMBC spectrum of $C_{Br_2BY_2}$ in $CD_2Cl_2$

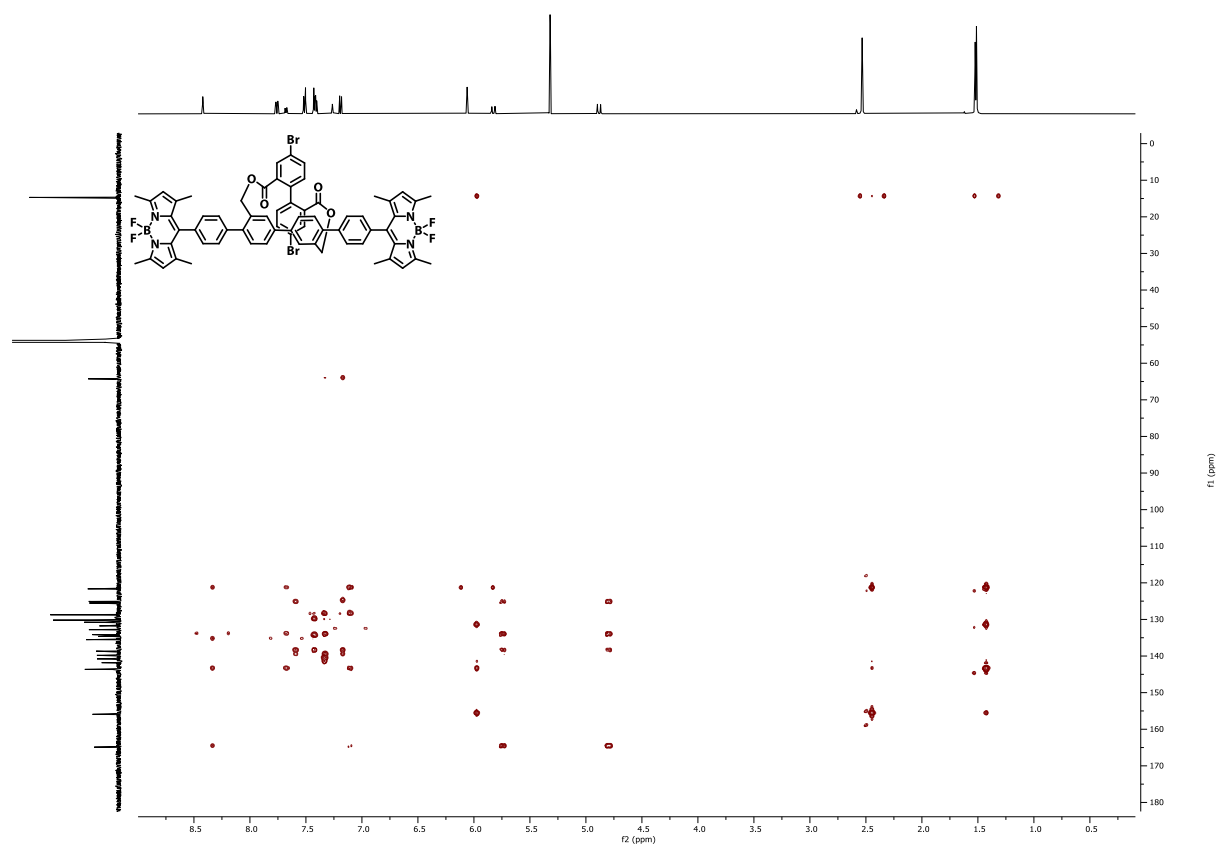

NOESY spectrum of  $C_{Br_2BY_2}$  in  $CD_2Cl_2$

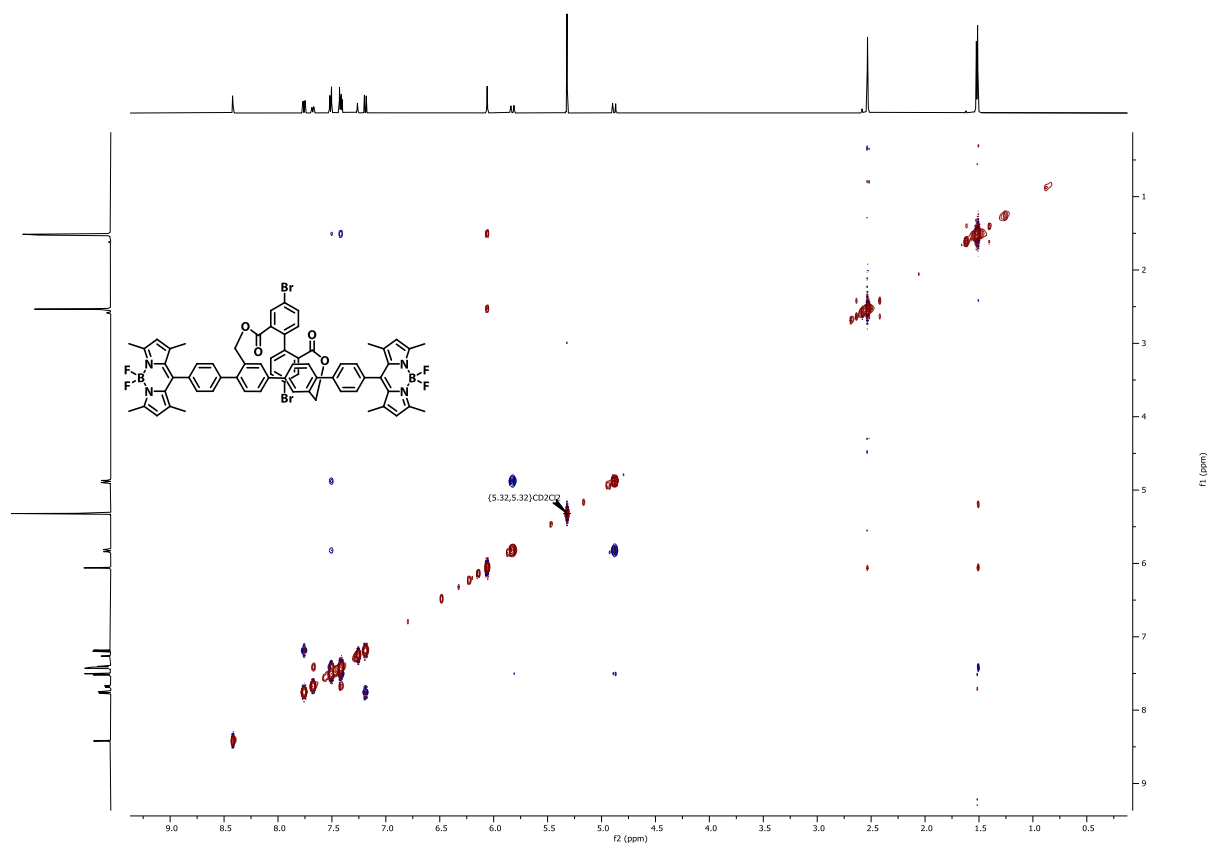

FT-IR spectrum of  $C_{Br_2BY_2}$  (neat)

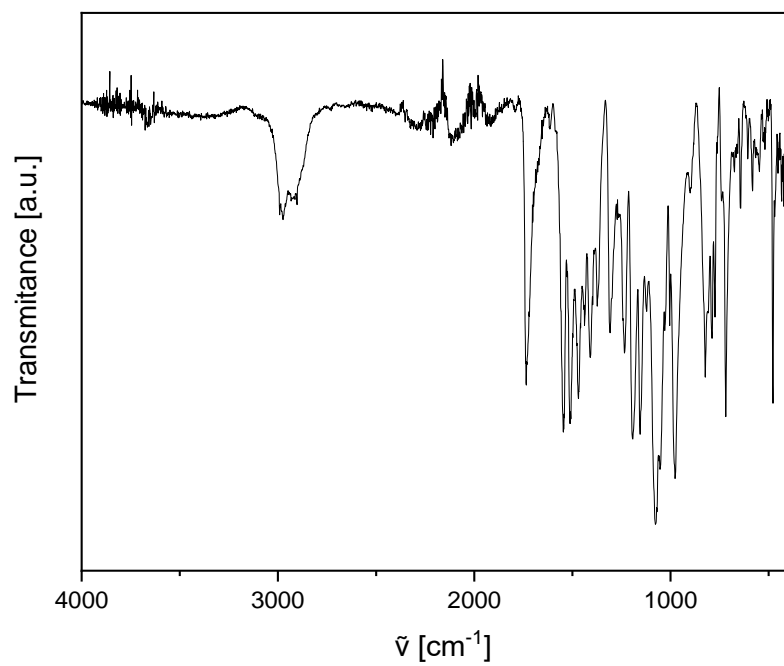



HR-ESI-MS spectrum of  $C_{Br_2BY_2}$

High Resolution Mass Spectrometry Report

Sample Name **KRO477**  
 Comment injected in MeOH

Instrument maXis 4G  
 Method 24 Direct\_pos\_high.m

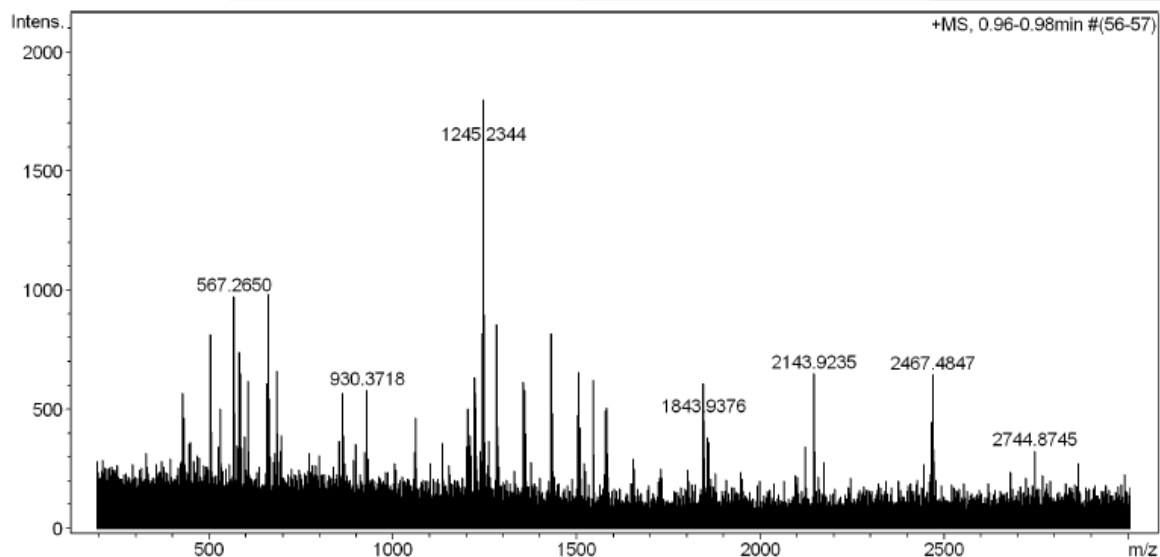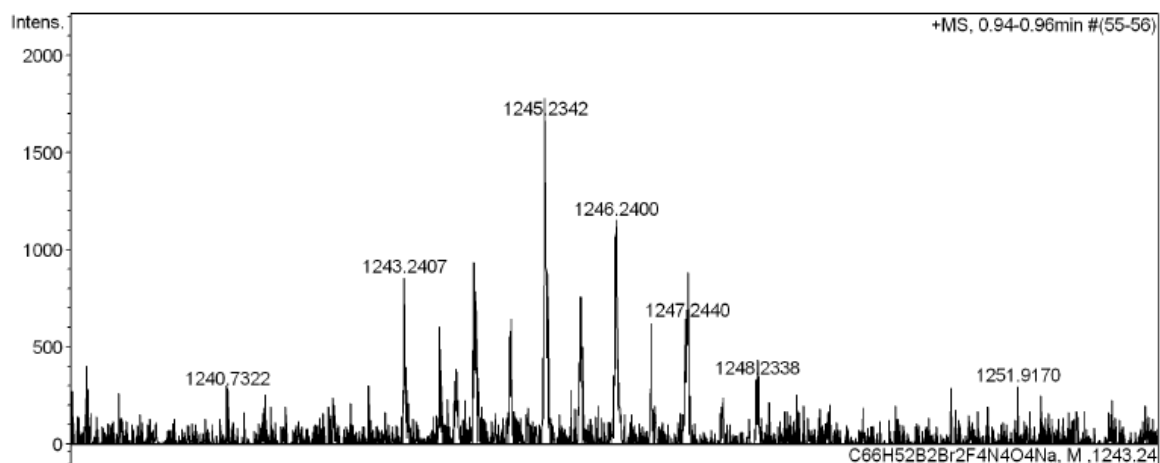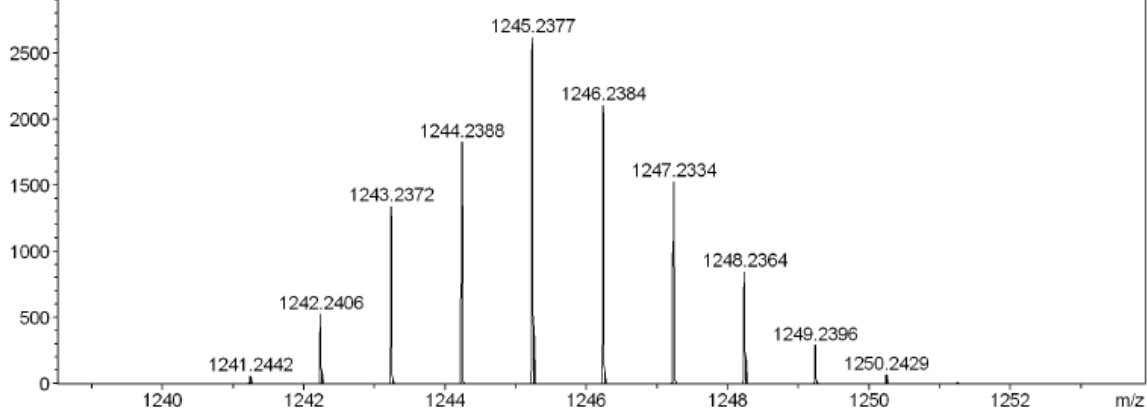

Measured m/z vs. theoretical m/z

| Meas. m/z | # | Formula                           | Score  | m/z       | err [mDa] | err [ppm] | mSigma | rdb  | e <sup>-</sup> Conf | z  |
|-----------|---|-----------------------------------|--------|-----------|-----------|-----------|--------|------|---------------------|----|
| 1243.2407 | 1 | C 66 H 52 B 2 Br 2 F 4 N 4 Na O 4 | 100.00 | 1243.2372 | -3.4      | -2.8      | 109.2  | 40.5 | even                | 1+ |
| 2441.5071 | 1 | C 132 H 105 B 4 Br 4 F 8 N 8 O 8  | 100.00 | 2441.5087 | 1.6       | 0.7       | 540.2  | 80.5 | even                |    |

### <sup>1</sup>H-NMR spectrum of C<sub>BY4</sub> in CD<sub>2</sub>Cl<sub>2</sub>

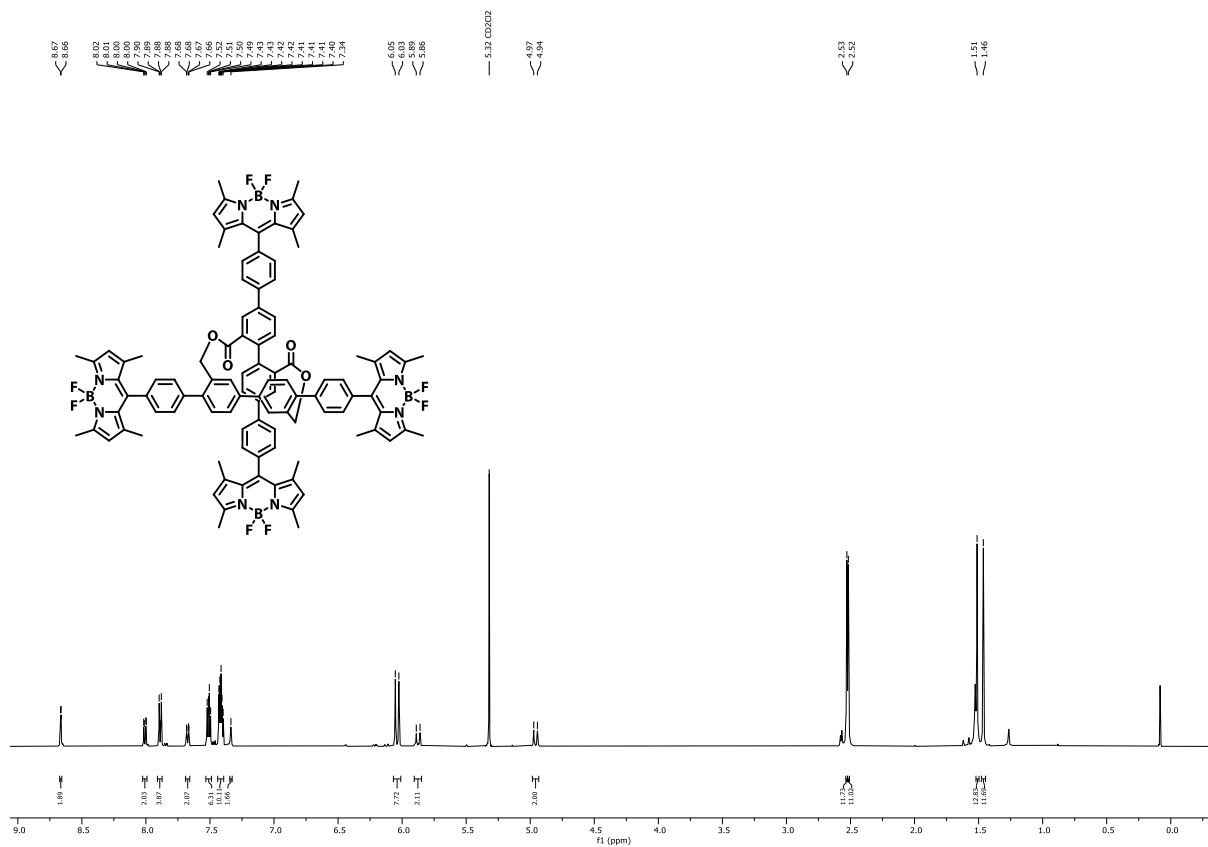

### <sup>13</sup>C-NMR spectrum of C<sub>BY4</sub> in CD<sub>2</sub>Cl<sub>2</sub>

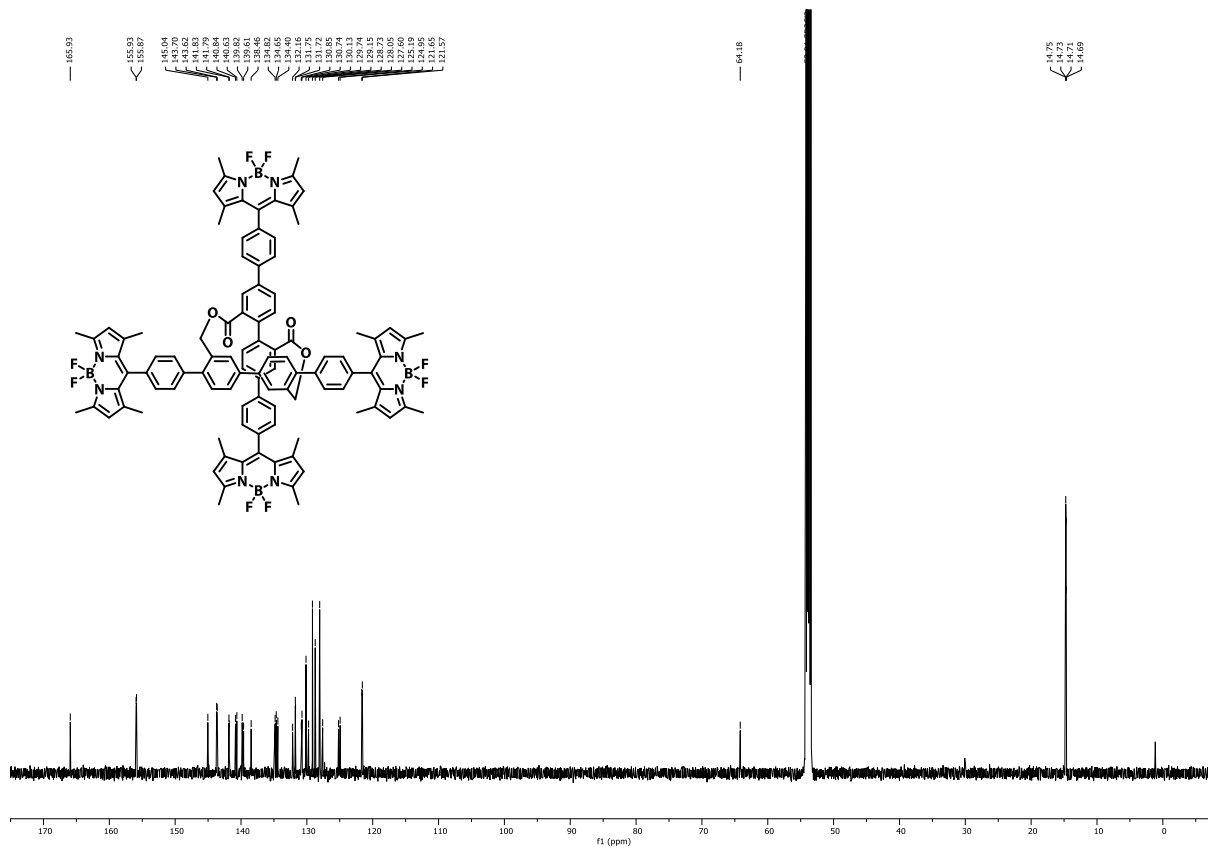

<sup>13</sup>C-Dept spectrum of C<sub>BY4</sub> in CD<sub>2</sub>Cl<sub>2</sub>

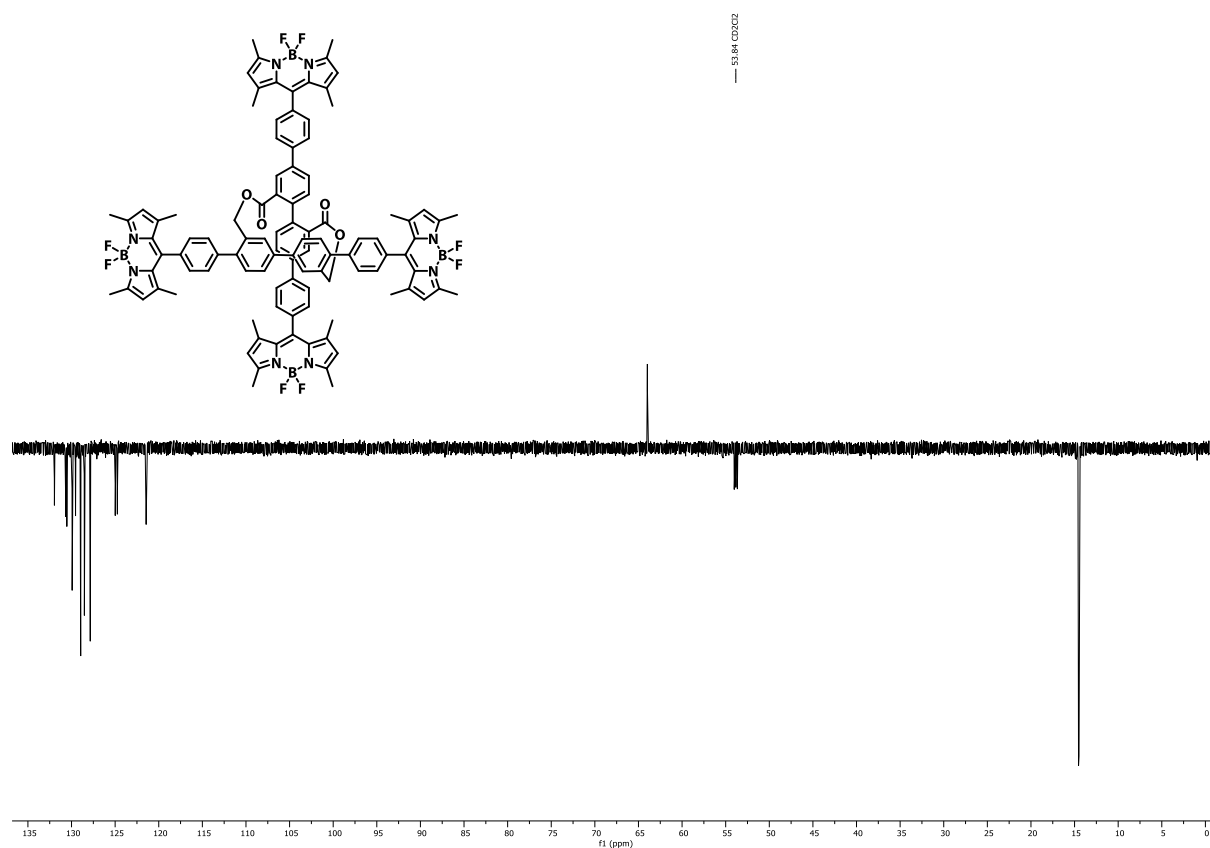

<sup>19</sup>F-NMR spectrum of C<sub>BY4</sub> in CD<sub>2</sub>Cl<sub>2</sub>

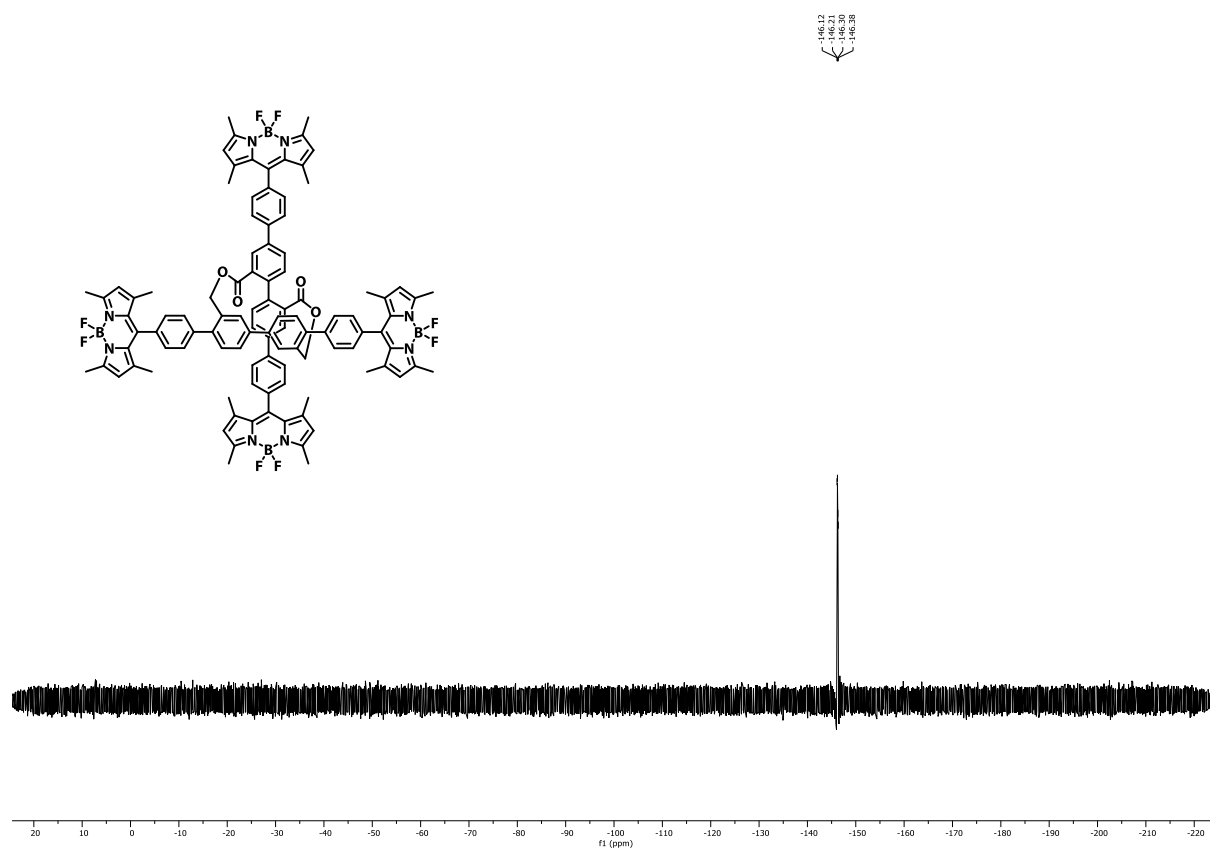

$^{11}\text{B}$ -NMR spectrum of  $\text{C}_{\text{BY}4}$  in  $\text{CD}_2\text{Cl}_2$

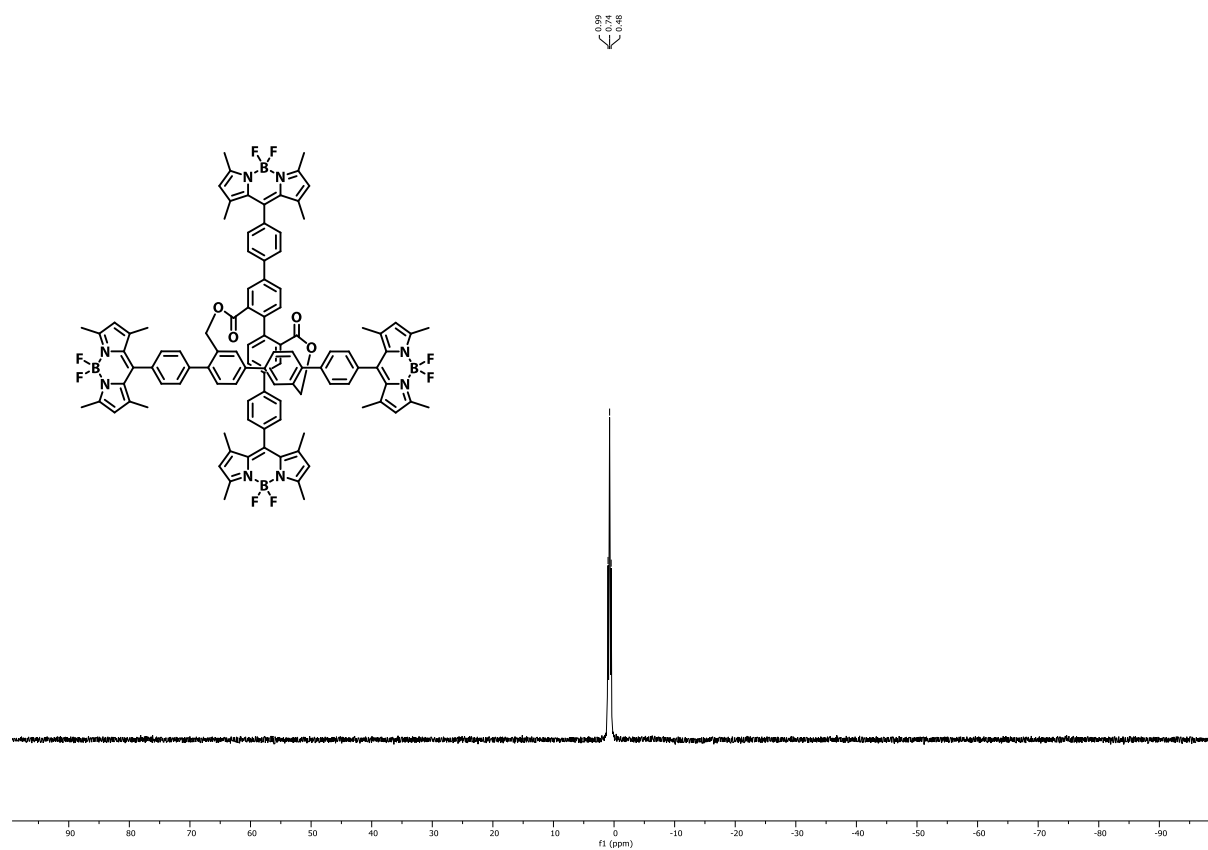

COSY spectrum of  $\text{C}_{\text{BY}4}$  in  $\text{CD}_2\text{Cl}_2$

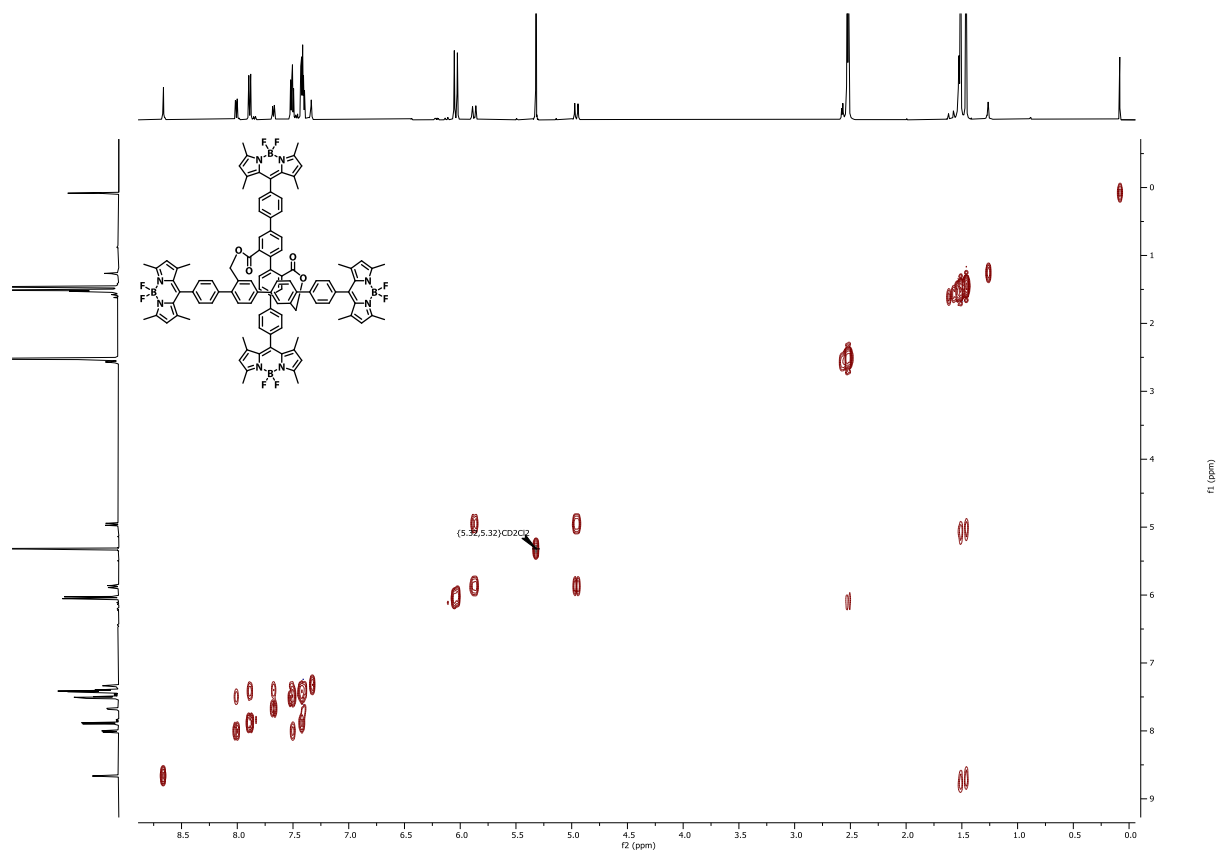

### HMQC spectrum of $C_{BY4}$ in $CD_2Cl_2$

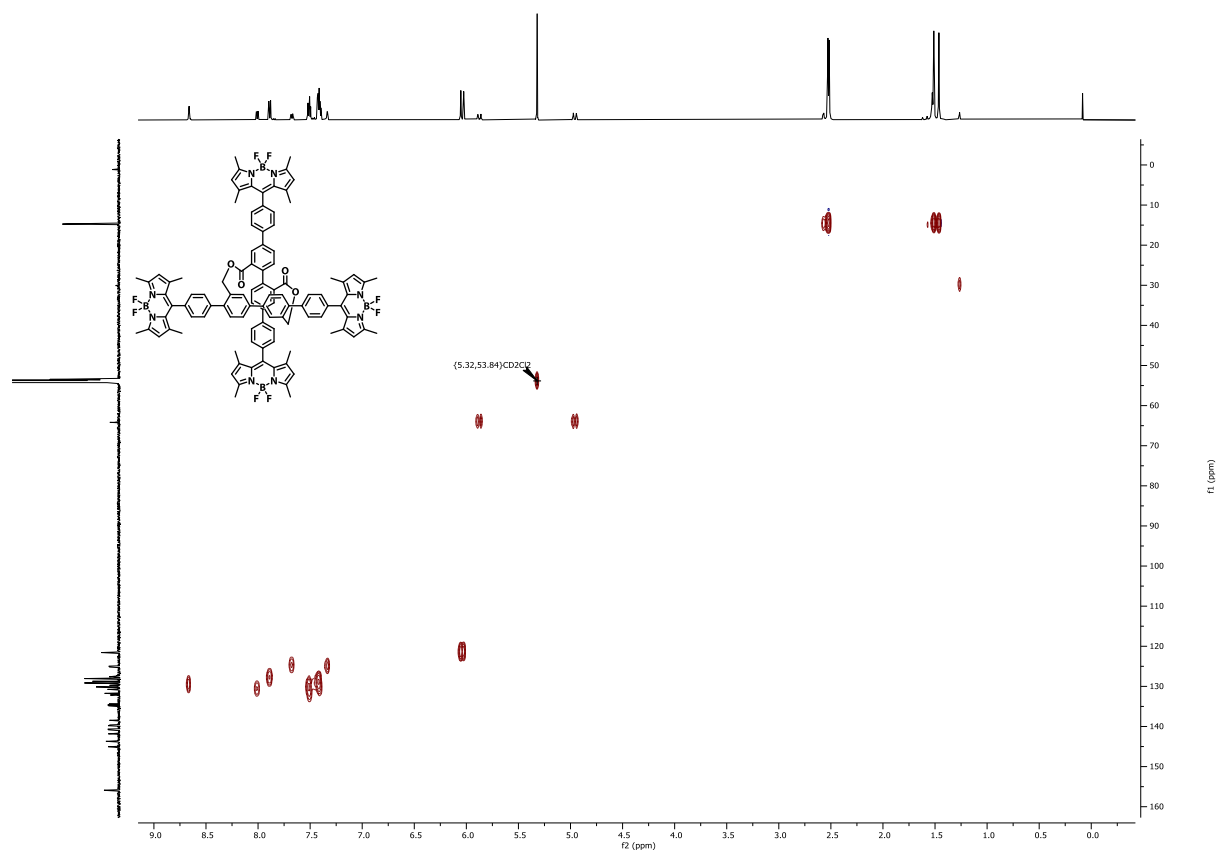

### HMBC spectrum of $C_{BY4}$ in $CD_2Cl_2$

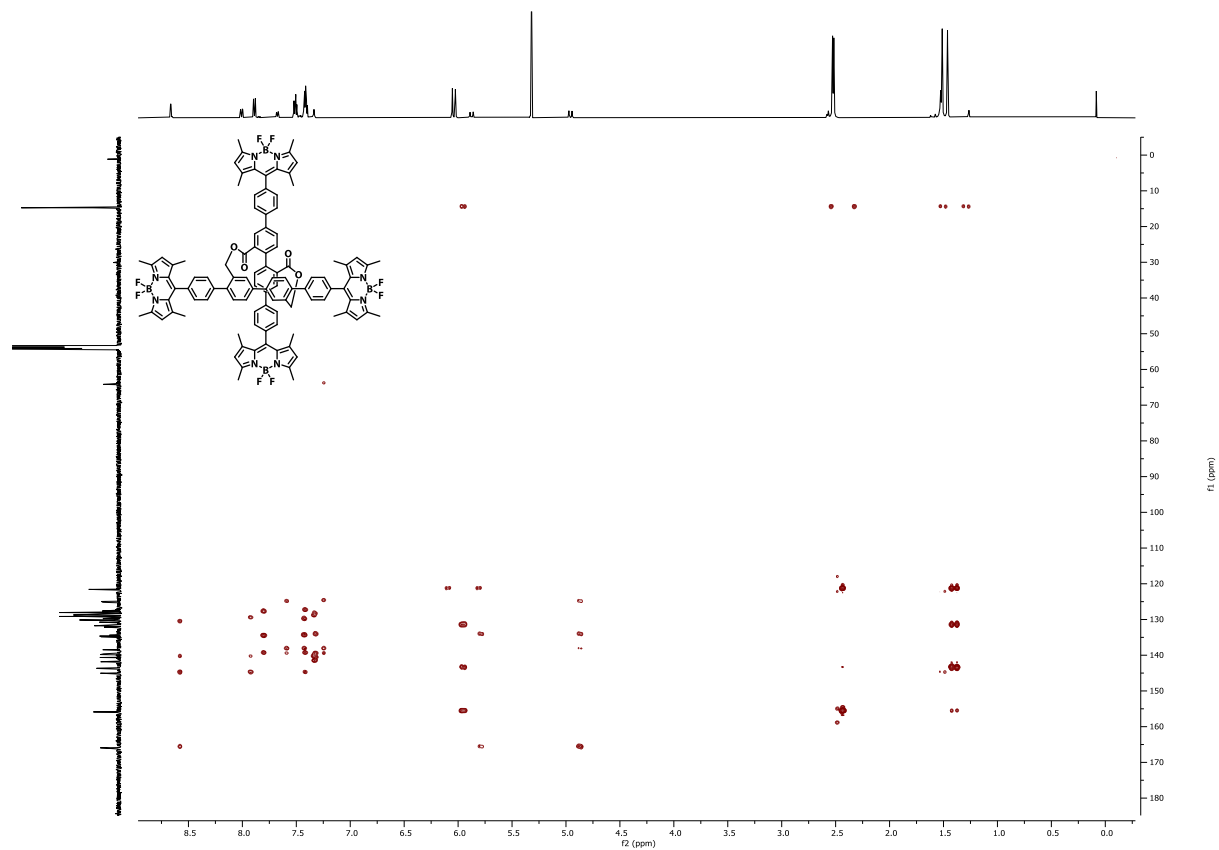

NOESY spectrum of **C<sub>BY4</sub>** in CD<sub>2</sub>Cl<sub>2</sub>

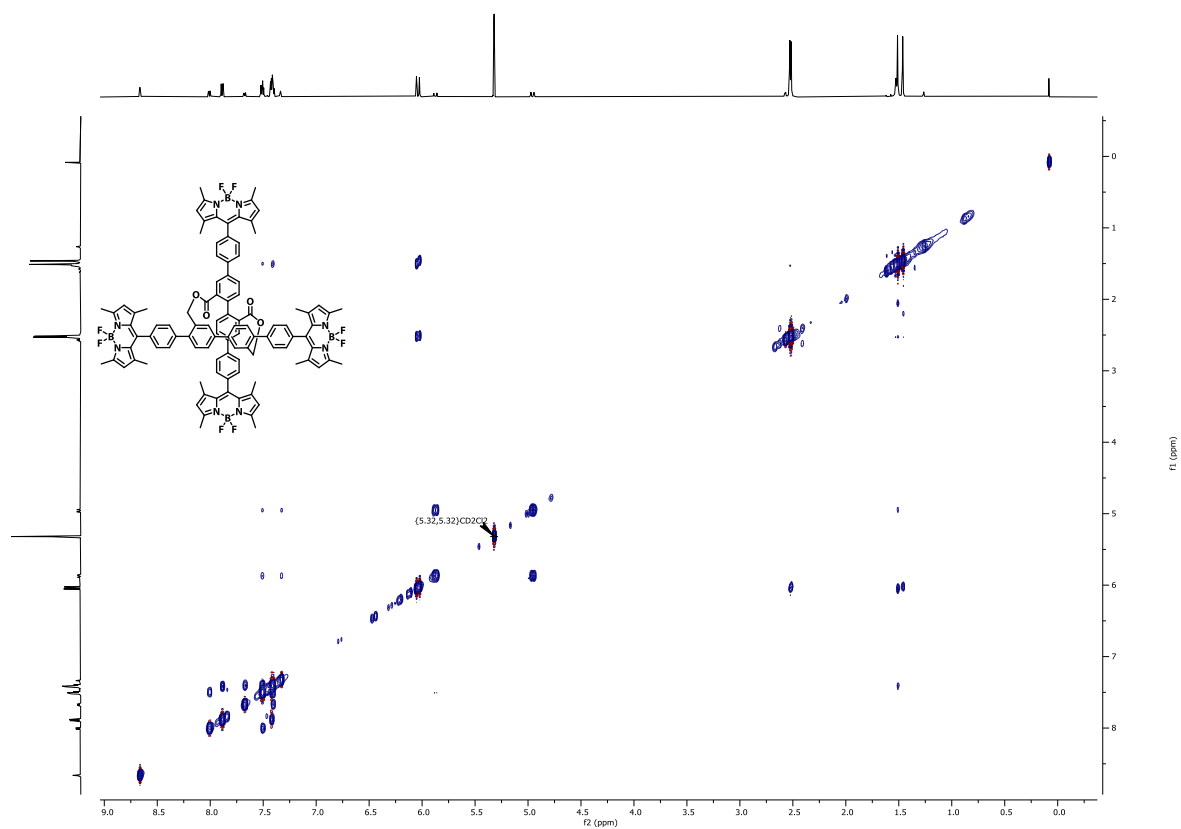

FT-IR spectrum of **C<sub>BY4</sub>** (neat)

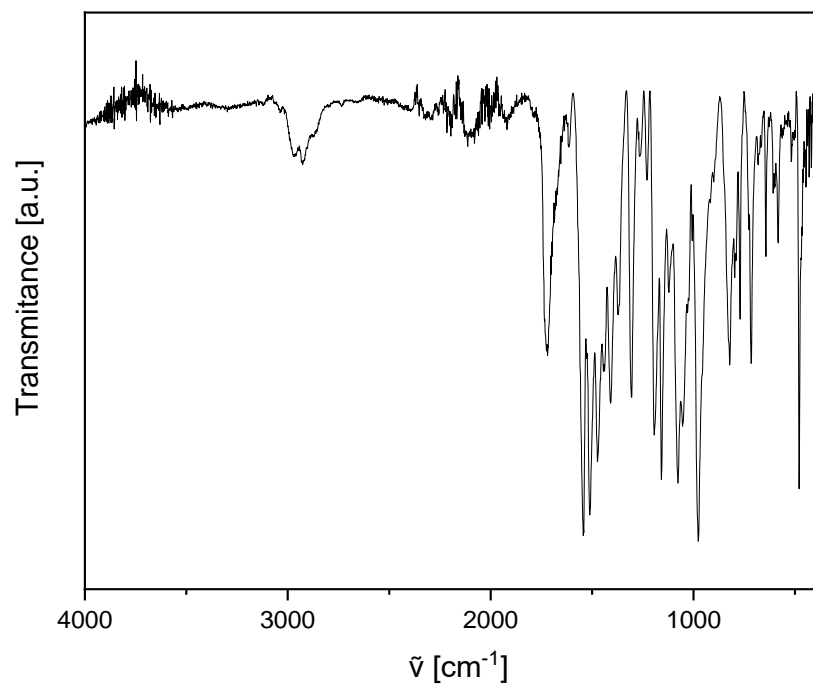

HR-ESI-MS spectrum of **C<sub>8</sub>Y<sub>4</sub>**

High Resolution Mass Spectrometry Report

Sample Name **KRO480**  
Comment

Instrument **maXis 4G**  
Method **ms\_nocolumn\_high\_pos\_use\_acn.m**

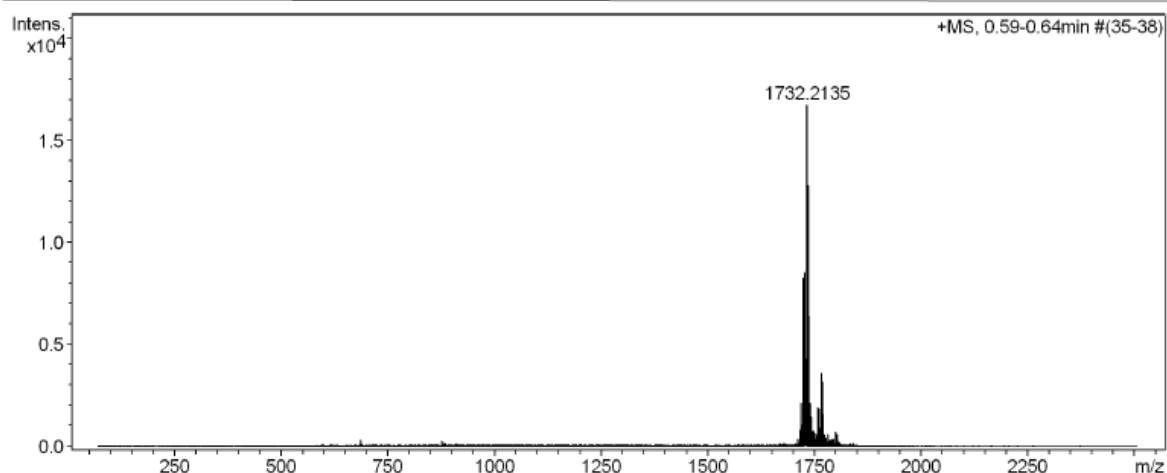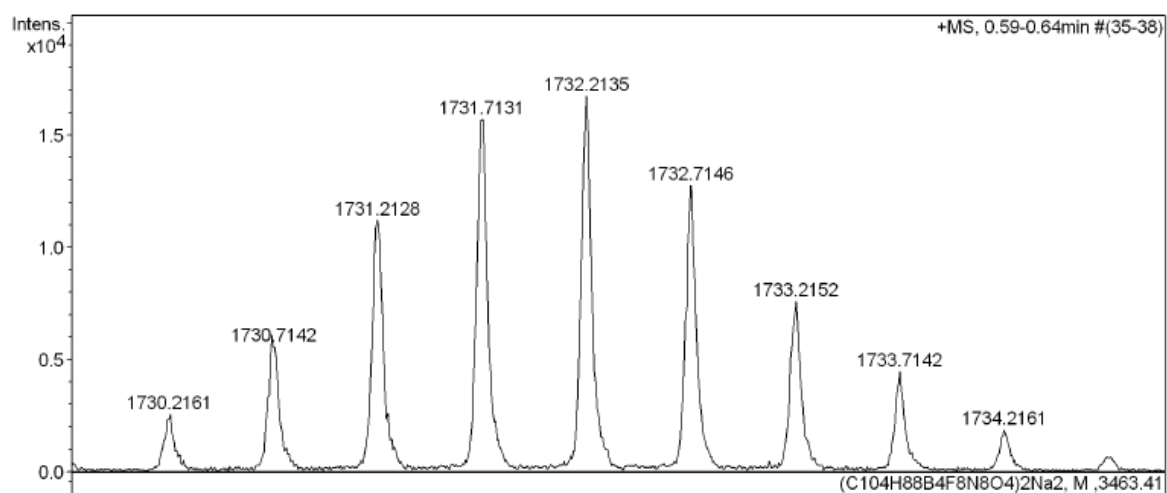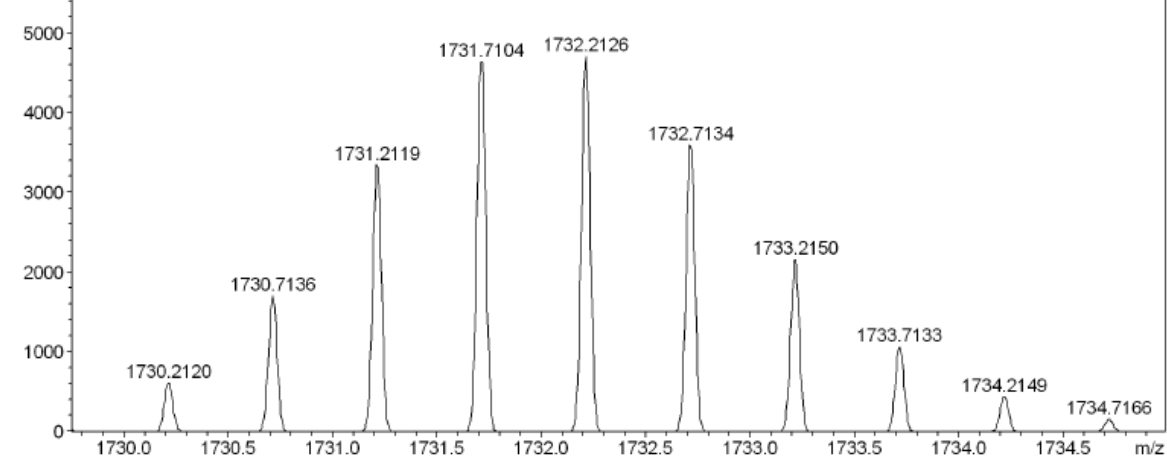

# <sup>1</sup>H-NMR spectrum of C<sub>Ni</sub>2BY2 in CD<sub>2</sub>Cl<sub>2</sub>

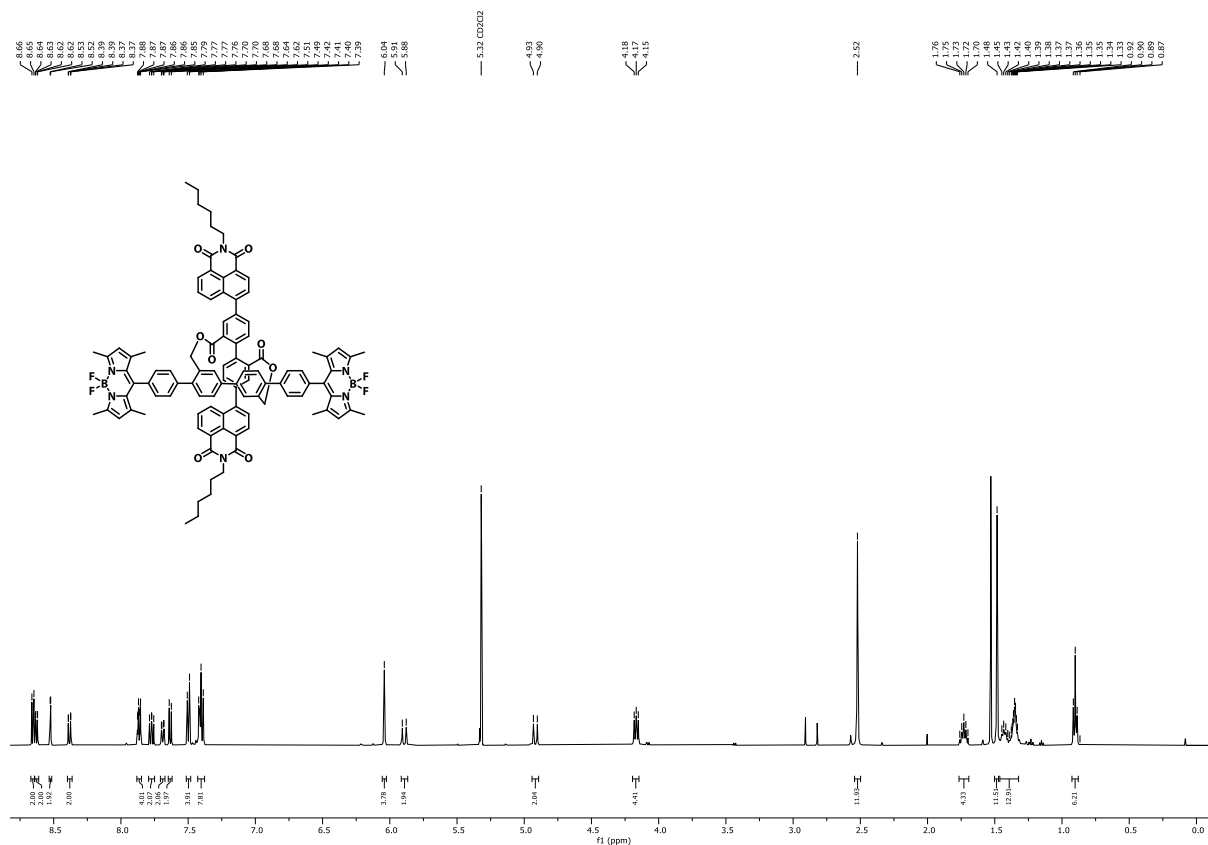

# <sup>13</sup>C-NMR spectrum of C<sub>Ni</sub>2BY2 in CD<sub>2</sub>Cl<sub>2</sub>

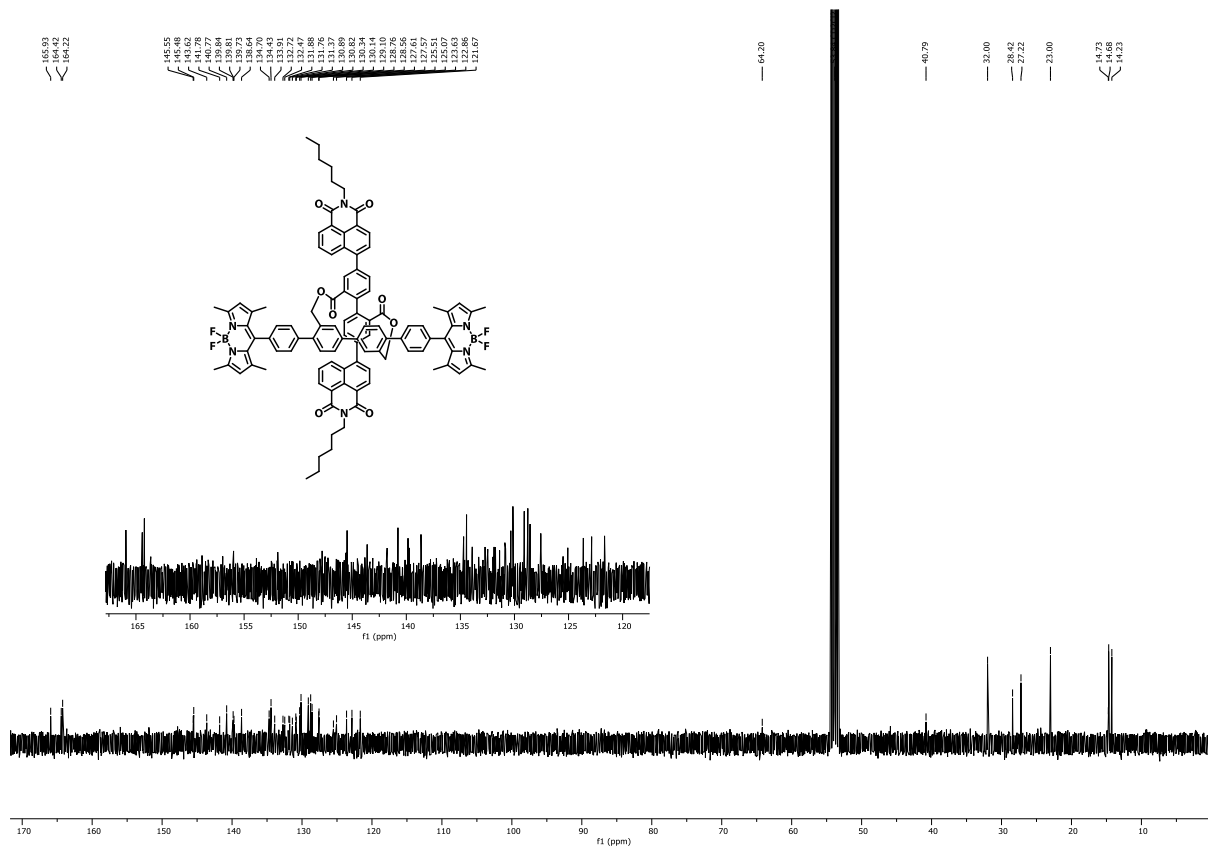



**<sup>13</sup>C-Dept** spectrum of **C<sub>NI2BY2</sub>** in CD<sub>2</sub>Cl<sub>2</sub>

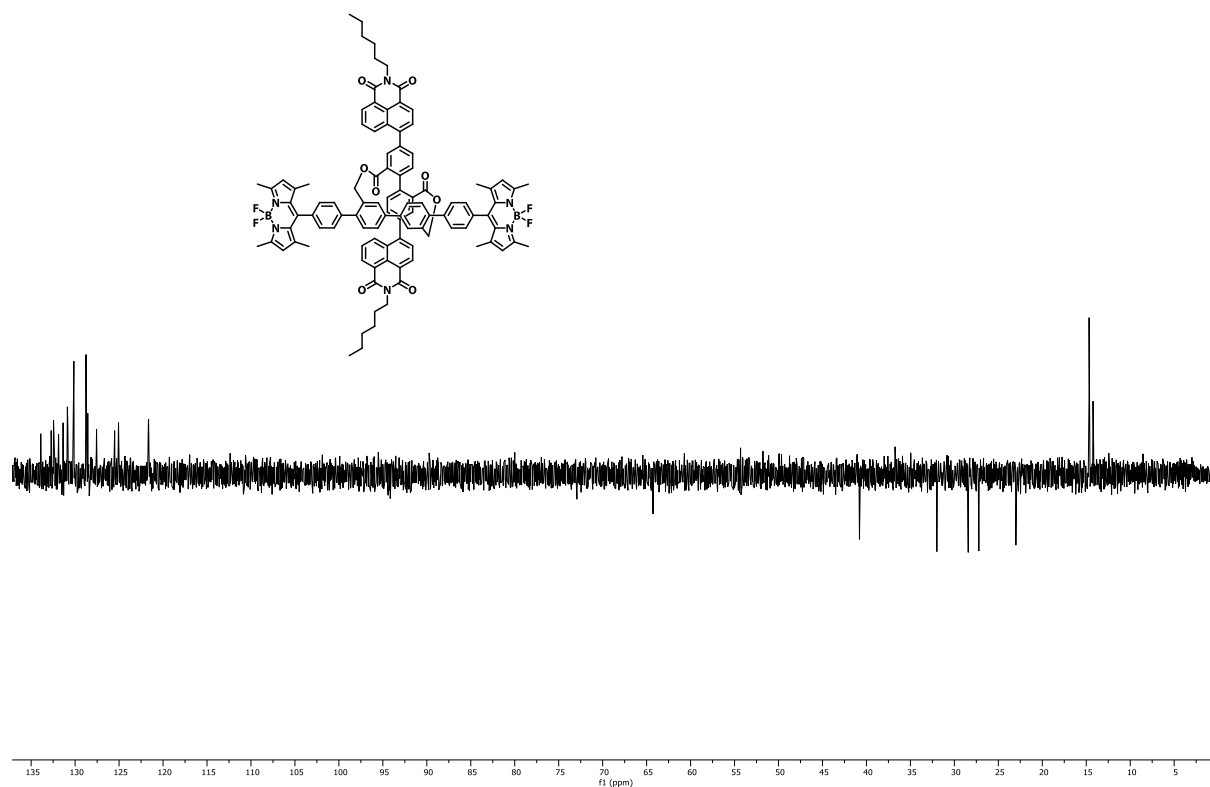

**<sup>19</sup>F-NMR** spectrum of **C<sub>NI2BY2</sub>** in CD<sub>2</sub>Cl<sub>2</sub><sub>kk</sub>

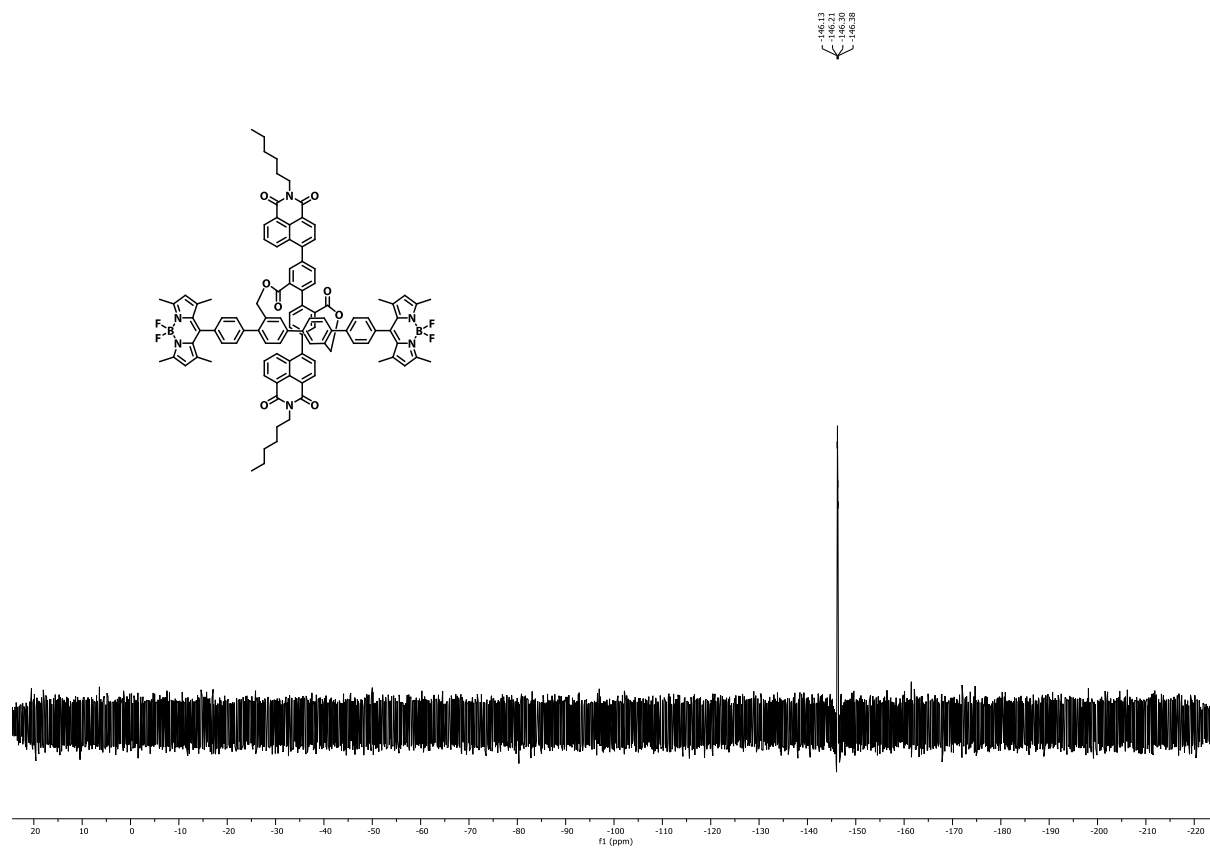

$^{11}\text{B}$ -NMR spectrum of  $\text{C}_{\text{Ni}2\text{BY}2}$  in  $\text{CD}_2\text{Cl}_2$

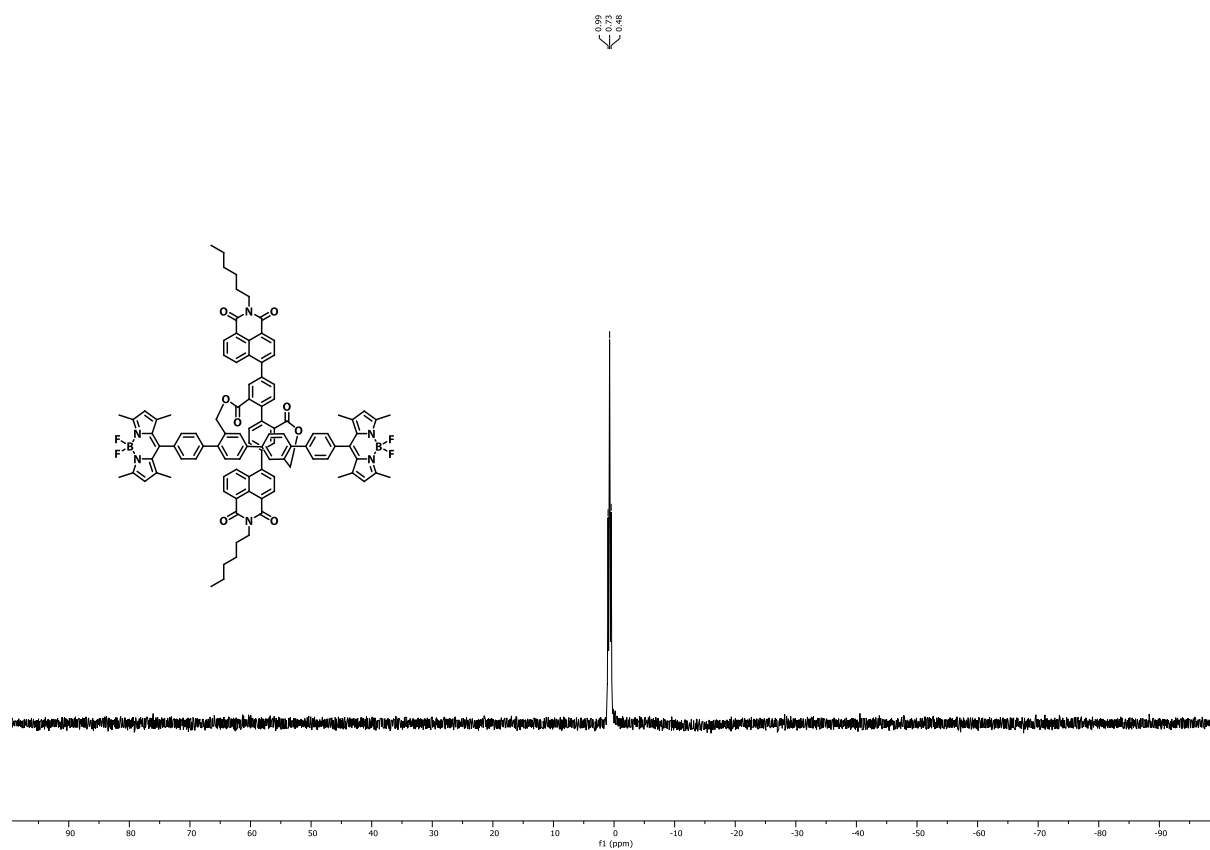

COSY spectrum of  $\text{C}_{\text{Ni}2\text{BY}2}$  in  $\text{CD}_2\text{Cl}_2$

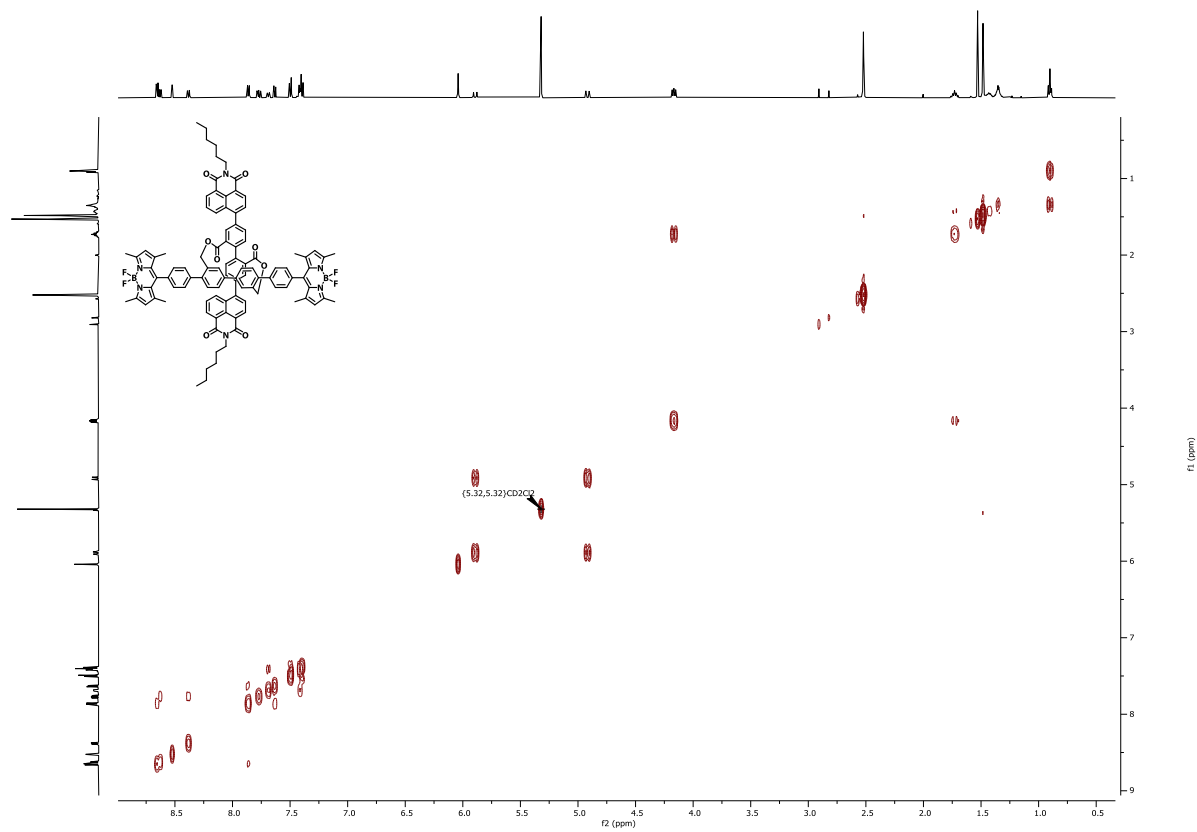

HMQC spectrum of  $C_{Ni2BY2}$  in  $CD_2Cl_2$

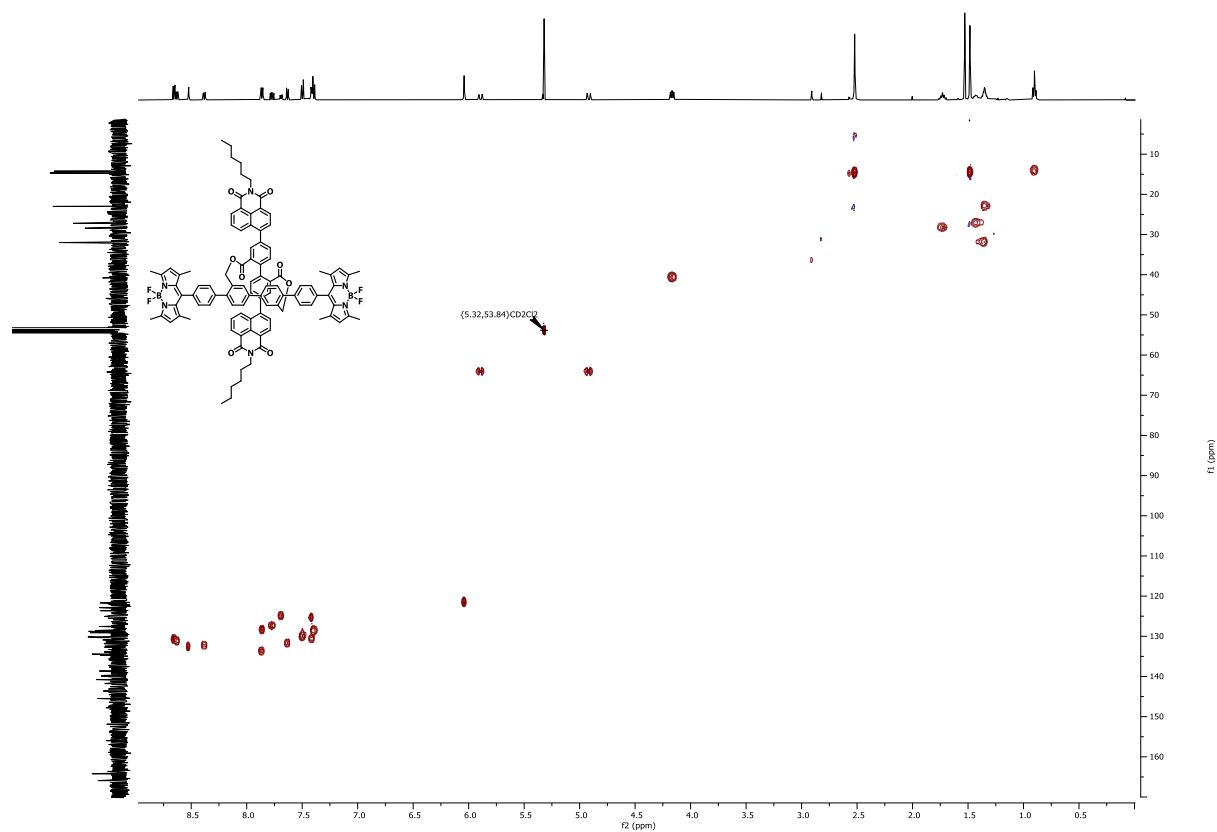

HMBC spectrum of  $C_{Ni2BY2}$  in  $CD_2Cl_2$

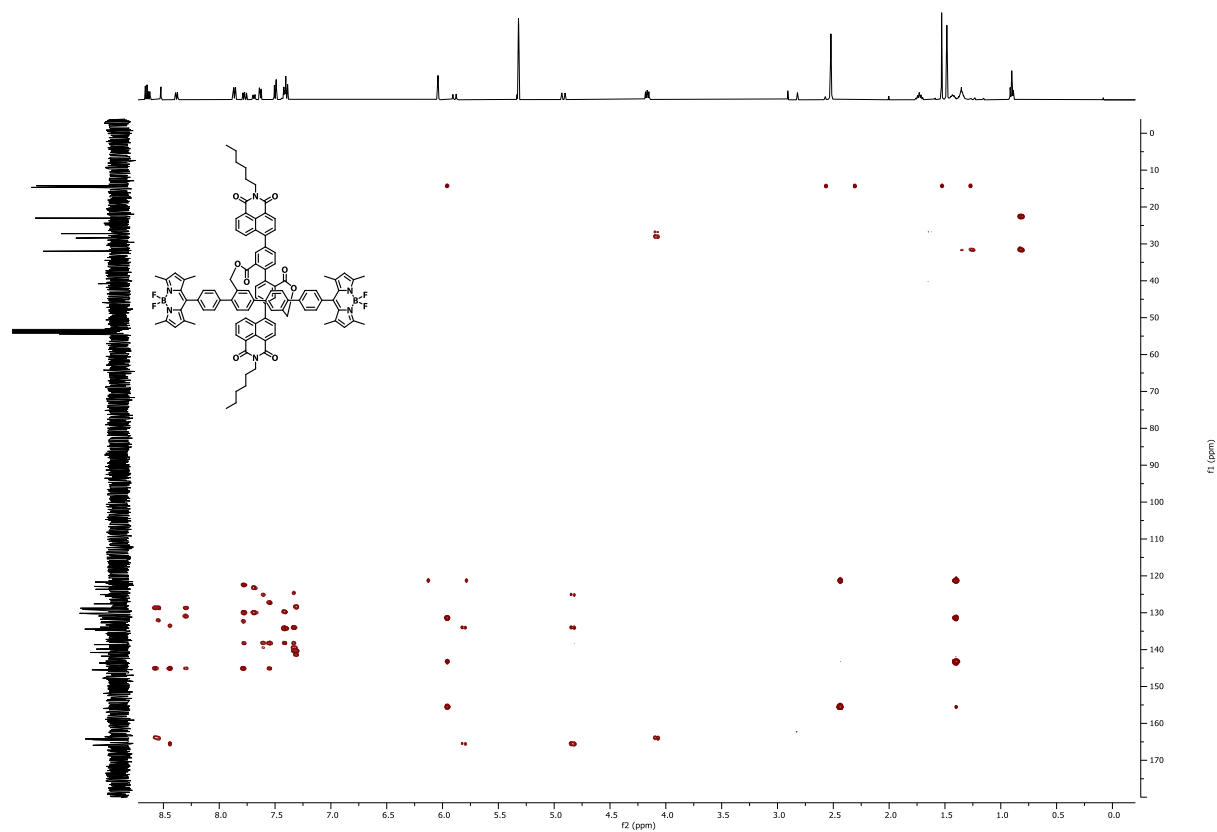

NOESY spectrum of  $C_{Ni2BY2}$  in  $CD_2Cl_2$

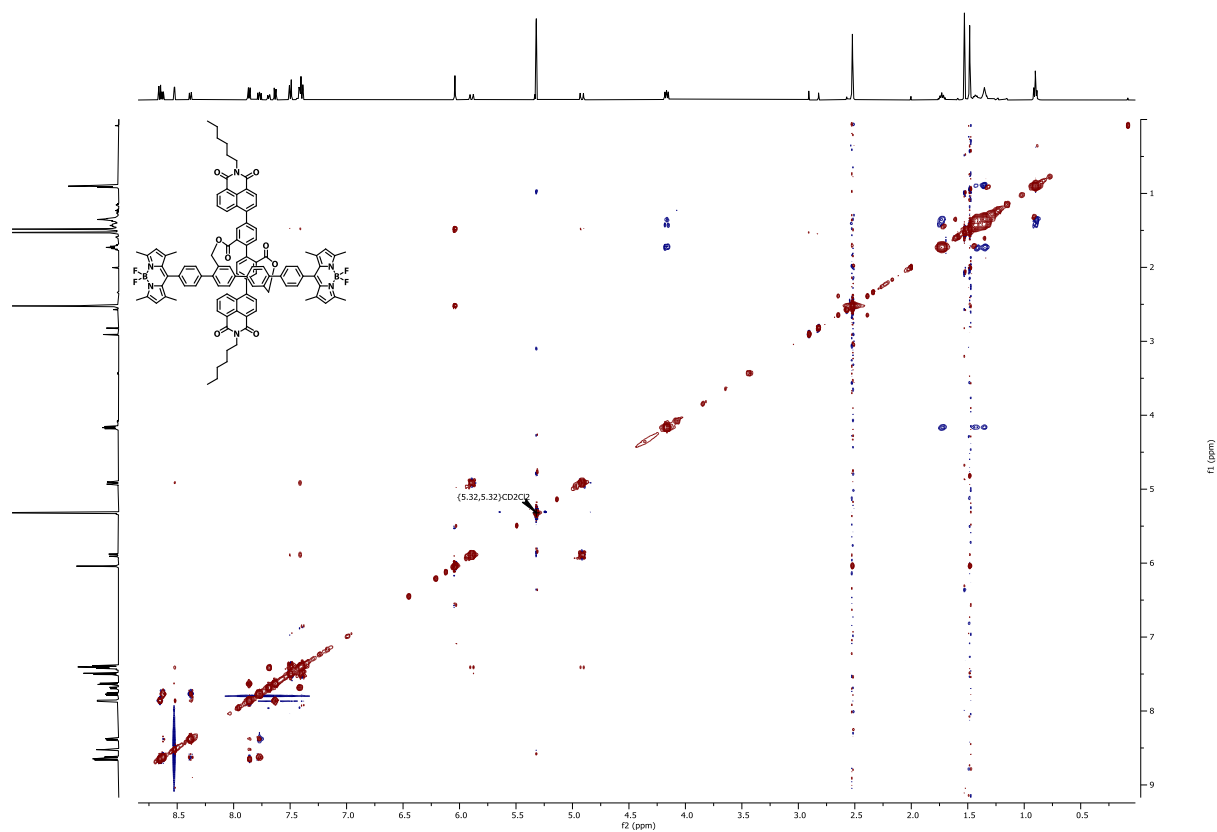

FT-IR spectrum of  $C_{Ni2BY2}$  (neat)

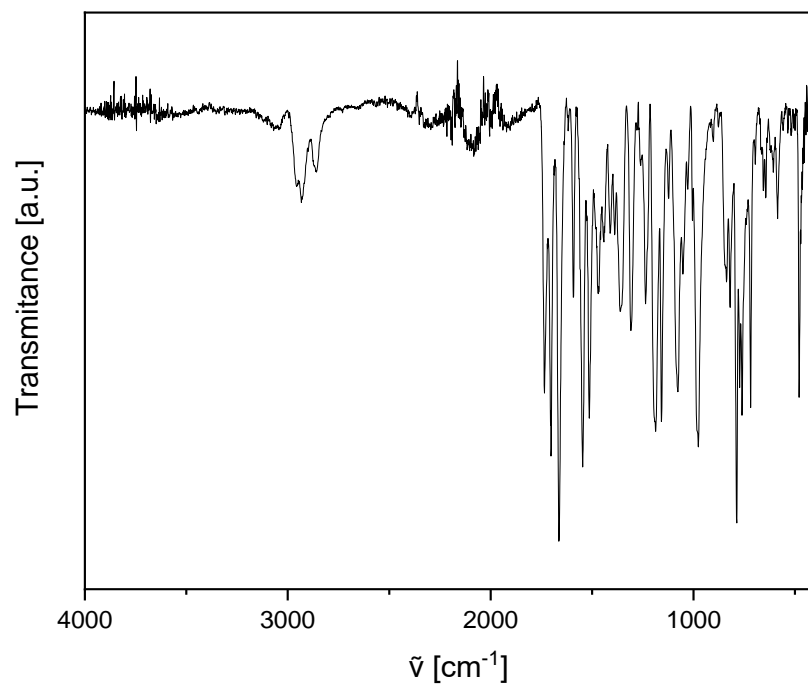

## High Resolution Mass Spectrometry Report

Sample Name **KRO487**  
Comment

Instrument **maXis 4G**  
Method **ms\_nocolumn\_high\_pos\_use\_acn.m**

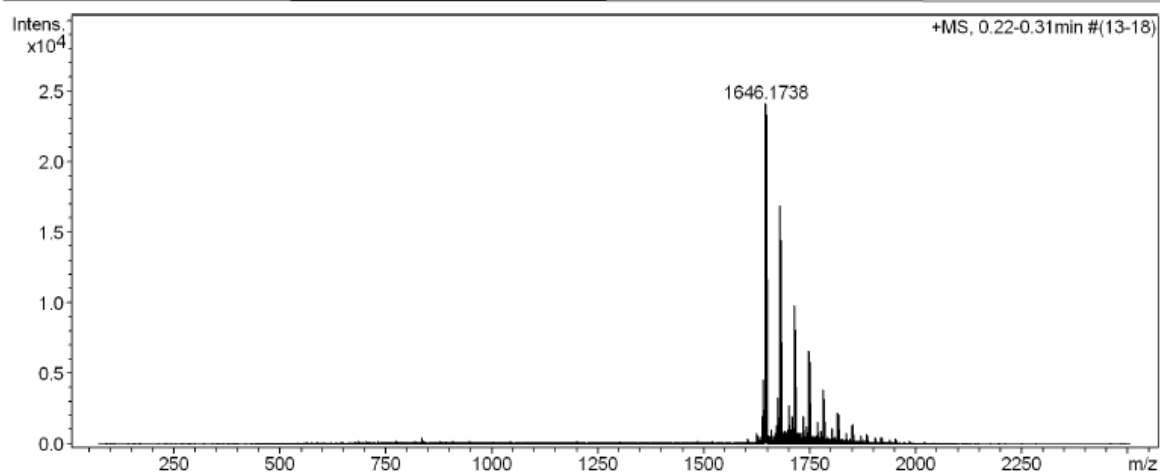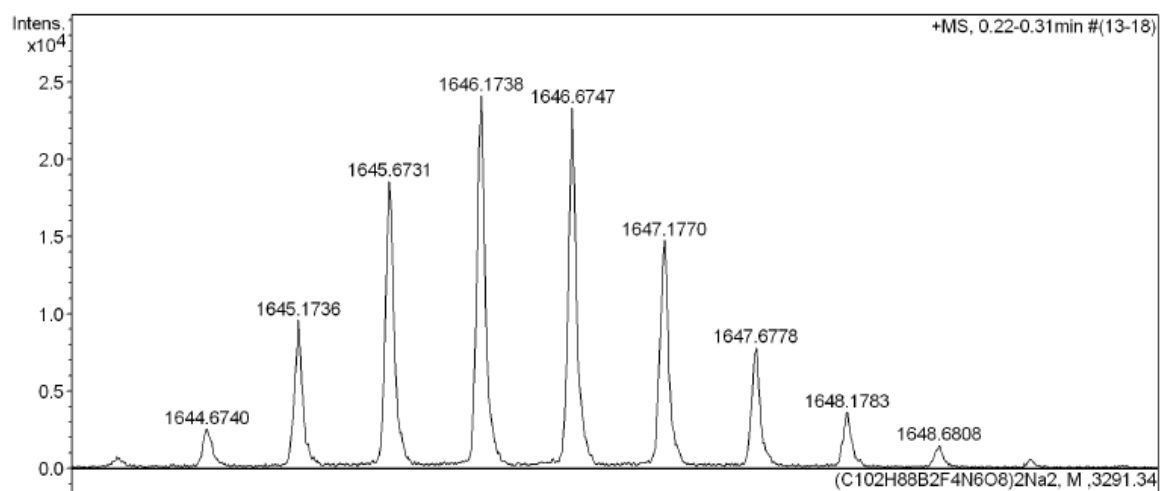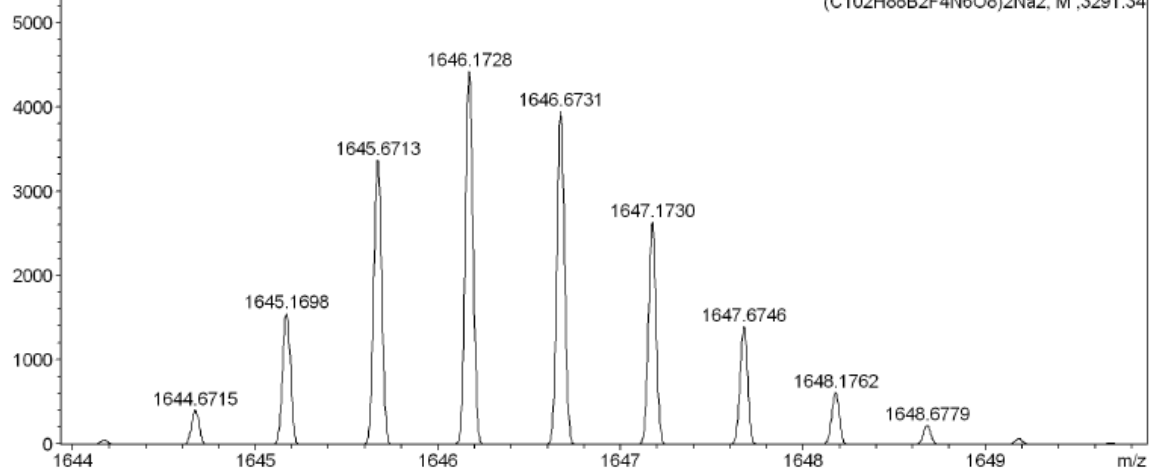

Supplement: d4qo01808g1.pdf [file d4qo01808g1.pdf]
